# Supplementary material
Source: PubMed Central journal article supplement (PMC9213091)
Supplement: NIHMS1793589-supplement-Supplementary_Material.pdf [file NIHMS1793589-supplement-Supplementary_Material.pdf]

Supplementary Information for

**Biocatalytic oxidative cross-coupling reactions for biaryl bond formation**

Lara E. Zetsche<sup>#</sup>, Jessica A. Yazarians<sup>#</sup>, Suman Chakrabarty, Meagan E. Hinze, Lauren A. M. Murray,  
April L. Lukowski, Leo A. Joyce, and Alison R. H. Narayan<sup>\*</sup>

<sup>#</sup>These authors contributed equally  
<sup>\*</sup>Corresponding author

## Table of contents

|                                                                            |             |
|----------------------------------------------------------------------------|-------------|
| <b>I. Chemical synthesis</b>                                               | <b>S3</b>   |
| Synthesis of substrates                                                    | S3          |
| Synthesis of authentic product standards                                   | S11         |
| Analytical scale generation of cross-coupled products                      | S22         |
| Chemical methods for oxidative cross-coupling                              | S28         |
| LC-MS traces for chemical oxidative coupling reactions                     | S34         |
| <b>II. Protein sequences, expression, and purification</b>                 | <b>S49</b>  |
| Bioinformatic analysis of natural P450 sequence space                      | S49         |
| Plasmids and sequences                                                     | S52         |
| Functional expression of fungal P450 in yeast                              | S56         |
| Expression and purification of bacterial enzymes                           | S57         |
| <b>III. Biocatalytic reactions with fungal P450 KtnC</b>                   | <b>S59</b>  |
| Methods for biocatalytic cross-couplings                                   | S59         |
| Standard curves and quantification of biocatalytic reactions               | S65         |
| LC-MS traces for biocatalytic reactions                                    | S71         |
| <b>IV. Directed evolution of KtnC</b>                                      | <b>S117</b> |
| Generation of protein libraries                                            | S117        |
| Screening protein libraries                                                | S122        |
| Engineered LxC sequences                                                   | S123        |
| Supplementary data from evolution campaign                                 | S127        |
| <b>V. Biocatalytic reactions with P450-RhFRed enzymes</b>                  | <b>S133</b> |
| Methods for biocatalytic cross-couplings                                   | S133        |
| Standard curves and quantification of biocatalytic reactions               | S134        |
| LC-MS traces for biocatalytic reactions                                    | S135        |
| <b>VI. Preparative scale biocatalytic reactions</b>                        | <b>S143</b> |
| <b>VII. Assignment of absolute configurations</b>                          | <b>S144</b> |
| <b>VIII. <sup>1</sup>H NMR and <sup>13</sup>C NMR spectra of compounds</b> | <b>S152</b> |
| <b>IX. References</b>                                                      | <b>S208</b> |

## I. Chemical synthesis

**General considerations.** All reagents were used as received unless otherwise noted. Reactions were carried out under a nitrogen atmosphere using standard Schlenk techniques unless otherwise noted. Solvents were degassed and dried over aluminum columns on an MBraun solvent system (Innovative Technology, Inc., Model PS-00-3). Reactions were monitored by thin layer chromatography using Machery-Nagel 60 F<sub>254</sub> precoated silica TLC plates (0.25 mm) or Merck Silica Gel 60 F<sub>254</sub> precoated silica TLC plates (0.25 mm) which were visualized using UV, *p*-anisaldehyde, CAM, DNP, or bromocresol green stain. Flash column chromatography was performed using Machery-Nagel 60  $\mu$ m (230-400 mesh) silica gel. All compounds purified by column chromatography were sufficiently pure for use in further experiments unless otherwise indicated. <sup>1</sup>H and <sup>13</sup>C NMR spectra were obtained in CDCl<sub>3</sub> at rt (25 °C), unless otherwise noted, on Varian 400 MHz or Varian 600 MHz spectrometers. Chemical shifts of <sup>1</sup>H NMR spectra were recorded in parts per million (ppm) on the  $\delta$  scale. High resolution electrospray mass spectra were obtained on an Agilent UPLC-QTOF at the University of Michigan Life Sciences Institute or Agilent UPLC-TOF at the University of Michigan Life Sciences Institute. IR spectra were recorded on a Perkin-Elmer Spectrum BX FT-IR spectrometer. SFC spectra were obtained on a Waters SCF Investigator SFC system. Circular dichroism spectra were obtained on a JASCO J-1500 CD Spectrometer.

### Synthesis of substrates

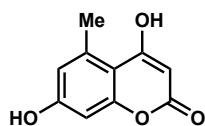

**4,7-dihydroxy-5-methyl-2H-chromen-2-one (S1).** To a mixture of 5-methylresorcinol (3.000 g, 24.16 mmol, 1.000 equiv), malonic acid (2.514 g, 24.16 mmol, 1.000 equiv) and ZnCl<sub>2</sub> flame-dried under vacuum (10.21 g, 74.91 mmol, 3.100 equiv) was added POCl<sub>3</sub> (60.00 mL). The reaction was heated at 60 °C and stirred for 14.5 h. The reaction was quenched by pouring into ice water and induced the precipitation of a solid, which was isolated by vacuum filtration. The crude solid was purified by flash column chromatography (5:6:1 toluene/ethyl acetate/formic acid v/v) to afford 3.380 g of the title compound (73% yield) as a yellow solid with minor impurities.  $R_f$  = 0.37 (8:3:1 toluene/ethyl acetate/formic acid v/v); <sup>1</sup>H NMR (400 MHz, DMSO-*d*<sub>6</sub>)  $\delta$  12.06 (s, 1H), 10.39 (s, 1H), 6.54 (s, 1H), 6.50 (s, 1H), 5.33 (s, 1H), 2.57 (s, 3H); <sup>13</sup>C NMR (150 MHz, DMSO-*d*<sub>6</sub>)  $\delta$  169.1, 161.9, 160.4, 157.0, 138.7, 115.6, 106.4, 100.4, 88.0, 22.8; HRMS (ESI) *m/z* calculated for C<sub>10</sub>H<sub>9</sub>O<sub>4</sub><sup>+</sup> [M+H]<sup>+</sup> 193.0495, found 193.0505. All spectra obtained were constant with literature values.<sup>1</sup>

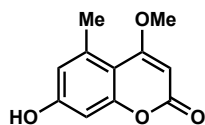

**7-hydroxy-4-methoxy-5-methyl-2H-chromen-2-one (4).** To a solution of 4,7-dihydroxy-5-methyl-2H-chromen-2-one (S1; 1.450 g, 7.546 mmol, 1.000 equiv) in MeOH (84.0 mL) was added H<sub>2</sub>SO<sub>4</sub> (8.4 mL). The reaction was heated at 75 °C for 6.2 h. Incubation at 0 °C induced the precipitation of a white solid which was isolated by vacuum filtration to afford 1.070 g of the title compound (69% yield).  $R_f$  = 0.43 (8:3:1 toluene/ethyl acetate/formic acid v/v); <sup>1</sup>H NMR (400 MHz, DMSO-*d*<sub>6</sub>)  $\delta$  10.46 (s, 1H), 6.57 (d, *J* = 2.4, 1H), 6.54 (d, *J* = 2.4, 1H), 5.59 (s, 1H), 3.92 (s, 3H), 2.53 (s, 3H); HRMS (ESI) *m/z* calculated for C<sub>11</sub>H<sub>11</sub>O<sub>4</sub><sup>+</sup> [M+H]<sup>+</sup> 207.0652, found 207.0657. All spectra obtained were constant with literature values.<sup>2</sup>

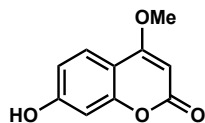

**7-hydroxy-4-methoxy-2H-chromen-2-one (9).** To a solution of 4,7-dihydroxycoumarin (250.0 mg, 1.403 mmol, 1.000 equiv) in MeOH (15.6 mL) was added H<sub>2</sub>SO<sub>4</sub> (1.6 mL). The reaction was heated at 75 °C for 2.8 h. Incubation at 0 °C induced the precipitation of a white solid which was isolated by vacuum filtration to afford

226.2 mg of the title compound (84% yield). **<sup>1</sup>H NMR** (600 MHz, DMSO-*d*<sub>6</sub>) δ 7.61 (d, *J*=8.7, 1H), 6.78 (dd, *J*=8.7, 2.3, 1H), 6.69 (d, *J*=2.3, 1H), 5.67 (s, 1H), 3.96 (s, 3H); **HRMS** (ESI) *m/z* calculated for C<sub>10</sub>H<sub>9</sub>O<sub>4</sub><sup>+</sup> [M+H]<sup>+</sup> 193.0495, found 193.0503. All spectra obtained were constant with literature values.<sup>3</sup>

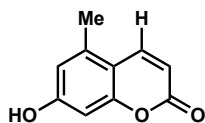

**7-hydroxy-5-methyl-2H-chromen-2-one (10).** Ethyl(3,3)-diethoxypropanoate (0.36 mL, 1.8 mmol, 1.0 equiv) was added neat to 5-methylresorcinol (250 mg, 2.0 mmol, 1.1 equiv). The reaction was heated at 120 °C and stirred until dissolved for 1 h. Toluene (5.0 mL) and toluene sulfonic acid monohydrate (77 mg, 0.40 mmol, 0.200 equiv) were added to the solution. The reaction was heated at 110 °C and stirred for 16 h. The reaction was quenched by pouring into ice water and further induced the precipitation of a solid, which was isolated by vacuum filtration to afford 320.0 mg of the title compound (99% yield). **<sup>1</sup>H NMR** (400 MHz, DMSO-*d*<sub>6</sub>) δ 10.45 (s, 1H), 8.05 (d, *J*=9.7, 1H), 6.64 (d, *J*=2.0, 1H), 6.55 (d, *J*=2.0, 1H), 6.19 (d, *J*=9.7, 1H), 2.42 (s, 3H); **HRMS** (ESI) *m/z* calculated for C<sub>10</sub>H<sub>9</sub>O<sub>3</sub><sup>+</sup> [M+H]<sup>+</sup> 177.0546, found 177.0556. All spectra obtained were constant with literature values.<sup>4</sup>

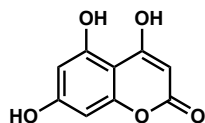

**4,5,7-trihydroxy-2H-chromen-2-one (S2).** 4,5,7-trihydroxy-2H-chromen-2-one (**S2**) was prepared from phloroglucinol and cyanoacetic acid according to the procedure described by Pandey et al.<sup>5</sup> **MP** = >310 °C; **R<sub>f</sub>** = 0.38 (8:3:1 toluene/ethyl acetate/formic acid v/v); **<sup>1</sup>H NMR** (600 MHz, DMSO-*d*<sub>6</sub>) δ 10.40 (s, 1H), 6.17 (s, 2H), 5.19 (s, 1H); **<sup>13</sup>C NMR** (150 MHz, DMSO-*d*<sub>6</sub>) δ 168.3, 162.2, 161.9, 156.9, 156.3, 98.6, 96.6, 94.7, 86.6; **IR** (thin film, cm<sup>-1</sup>) 3097, 2707, 2600, 1634, 1569, 1471, 1415; **HRMS** (ESI) *m/z* calculated for C<sub>9</sub>H<sub>7</sub>O<sub>5</sub><sup>+</sup> [M+H]<sup>+</sup> 195.0288, found 195.0295.

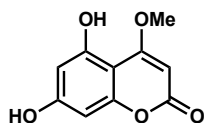

**5,7-dihydroxy-4-methoxy-2H-chromen-2-one (13).** To a solution of 4,5,7-trihydroxy-2H-chromen-2-one (**S2**, 67.6 mg, 0.35 mmol, 1.00 equiv) in MeOH (3.0 mL) was added H<sub>2</sub>SO<sub>4</sub> (0.35 mL). The reaction was heated at 80 °C for 1.5 h. Incubation at 0 °C induced the precipitation of a tan solid which was isolated by vacuum filtration to afford 19.0 mg of the title compound (26% yield). **MP** = 224.2-226.5 °C; **R<sub>f</sub>** = 0.42 (8:3:1 toluene/ethyl acetate/formic acid v/v); **<sup>1</sup>H NMR** (600 MHz, DMSO-*d*<sub>6</sub>) δ 6.20 (d, *J*=2.1, 1H), 6.17 (d, *J*=2.5, 1H), 5.49 (s, 1H), 3.90 (s, 3H); **<sup>13</sup>C NMR** (150 MHz, DMSO-*d*<sub>6</sub>) δ 168.8, 161.8, 161.6, 156.7, 156.0, 99.5, 96.5, 94.6, 85.2, 56.7; **IR** (thin film, cm<sup>-1</sup>) 3402, 3234, 3089, 1700, 1642, 1609, 1579, 1521, 1464, 1443, 1405; **HRMS** (ESI) *m/z* calculated for C<sub>10</sub>H<sub>9</sub>O<sub>5</sub><sup>+</sup> [M+H]<sup>+</sup> 209.0444, found 209.0452.

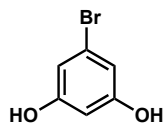

**5-bromoresorcinol (S3).** To a solution of 1-bromo-3,5-dimethoxybenzene (2.00 g, 8.33 mmol, 1.00 equiv) in CH<sub>2</sub>Cl<sub>2</sub> (8.3 mL) was added 1 M BBr<sub>3</sub> solution in CH<sub>2</sub>Cl<sub>2</sub> (25.0 mL, 25.0 mmol, 3.00 equiv) at -78 °C. The reaction was warmed to rt and stirred for 16 h. The reaction was quenched by slow addition of water (10 mL) at 0 °C and extracted with ethyl acetate (3x). The organic layers were combined, washed with brine, dried over Na<sub>2</sub>SO<sub>4</sub>, filtered, and evaporated under reduced pressure to afford an oil. The crude product was purified by flash column chromatography (9:1 to 7:3 hexanes/ethyl acetate v/v) to afford 1.846 g of the title compound (85% yield) as an

off-white solid.  $^1\text{H NMR}$  (400 MHz,  $\text{CD}_3\text{OD}$ )  $\delta$  6.42 (d,  $J = 2.1$ , 2H), 6.19 (t,  $J = 2.1$ , 1H). All spectra obtained were constant with literature values.<sup>6</sup>

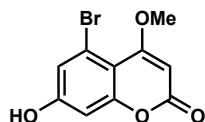

**5-bromo-7-hydroxy-4-methoxy-2H-chromen-2-one (14).** To a mixture of 5-bromoresorcinol (**S3**, 422.0 mg, 2.232 mmol, 1.000 equiv), malonic acid (232.3 mg, 2.232 mmol, 1.000 equiv) and  $\text{ZnCl}_2$  flame-dried under vacuum (943.0 g, 6.919 mmol, 3.100 equiv) was added  $\text{POCl}_3$  (5.6 mL). The reaction was heated at 60 °C and stirred for 15.1 h. The reaction was quenched by pouring into ice water and induced the precipitation of a solid, which was isolated by vacuum filtration. The crude material was used without further purification due to decomposition under flash column chromatography conditions. To a solution of crude 5-bromo-4,7-dihydroxy-2H-chromen-2-one (459.0 mg, 1.785 mmol, 1.000 equiv) in MeOH (20.0 mL) was added  $\text{H}_2\text{SO}_4$  (2.0 mL). The reaction was heated at 75 °C for 7.1 h. Partial concentration of the solution and incubation at 0 °C induced the precipitation of a white solid which was isolated by vacuum filtration to afford 34.3 mg of the title compound (13% yield). **MP** = 207.4-212.0 °C; **R<sub>f</sub>** = 0.41 (8:3:1 toluene/ethyl acetate/formic acid v/v);  $^1\text{H NMR}$  (600 MHz,  $\text{DMSO-}d_6$ )  $\delta$  7.04 (d,  $J = 2.4$ , 1H), 6.71 (d,  $J = 2.4$ , 1H), 5.71 (s, 1H), 3.92 (s, 3H);  $^{13}\text{C NMR}$  (150 MHz,  $\text{DMSO-}d_6$ )  $\delta$  166.4, 160.9, 160.7, 156.2, 119.7, 117.6, 106.2, 102.7, 87.9, 56.6; **IR** (thin film,  $\text{cm}^{-1}$ ) 3406, 3147, 1694, 1611, 1589, 1550, 1433; **HRMS** (ESI)  $m/z$  calculated for  $\text{C}_{10}\text{H}_8\text{BrO}_4^+$   $[\text{M}+\text{H}]^+$  270.9600, found 270.9607.

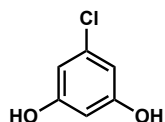

**5-chlororesorcinol (S4).** To a solution of 1-chloro-3,5-dimethoxybenzene (1.00 g, 5.79 mmol, 1.00 equiv) dissolved in  $\text{CH}_2\text{Cl}_2$  (6.0 mL) was added a 1-M solution of  $\text{BBr}_3$  in  $\text{CH}_2\text{Cl}_2$  (12.2 mL, 12.1 mmol, 2.10 equiv) at -78 °C. The reaction was allowed to warm to rt and stirred for 14 h. The reaction was quenched with the addition of water (4.0 mL). The aqueous phase was extracted with ethyl acetate (3x). The organic layers were combined, washed with brine, dried over  $\text{Na}_2\text{SO}_4$ , filtered, and evaporated under reduced pressure to afford an oil. The crude residue was purified by flash column chromatography (4:1 hexanes/ethyl acetate v/v) to afford 661 mg of the title compound (79% yield) as a pink solid.  $^1\text{H NMR}$  (400 MHz, acetone- $d_6$ )  $\delta$  8.63 (s, 2H), 6.37 (d,  $J = 2.1$ , 2H), 6.30 (t,  $J = 2.1$ , 1H). All spectra obtained were constant with literature values.<sup>7</sup>

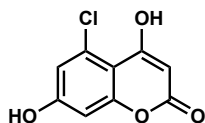

**5-chloro-4,7-dihydroxy-2H-chromen-2-one (S5).** To a mixture of 5-chlororesorcinol (**S4**, 300.0 mg, 2.075 mmol, 1.000 equiv), malonic acid (215.9 mg, 2.075 mmol, 1.000 equiv) and  $\text{ZnCl}_2$  flame-dried under vacuum (876.7 mg, 6.432 mmol, 3.100 equiv) was added  $\text{POCl}_3$  (5.2 mL). The reaction was heated at 60 °C and stirred for 14.5 h. The reaction was quenched by pouring into ice water and induced the precipitation of a solid, which was isolated by vacuum filtration. The crude solid was purified by flash column chromatography (8:3:1 toluene/ethyl acetate/formic acid v/v) to afford a 108.3 mg of the title compound (24% yield) as a tan solid with minor impurities. **MP** = 250.1-252.9 °C; **R<sub>f</sub>** = 0.45 (8:3:1 toluene/ethyl acetate/formic acid v/v);  $^1\text{H NMR}$  (600 MHz, acetone- $d_6$ )  $\delta$  6.88 (d,  $J = 2.4$ , 1H), 6.70 (d,  $J = 2.4$ , 1H), 5.51 (s, 1H);  $^{13}\text{C NMR}$  (150 MHz, acetone- $d_6$ )  $\delta$  166.9, 161.6, 161.2, 158.5, 132.8, 116.5, 107.0, 103.2, 91.0; **IR** (thin film,  $\text{cm}^{-1}$ ) 3254, 3080, 2940, 1617, 1547, 1436; **HRMS** (ESI)  $m/z$  calculated for  $\text{C}_9\text{H}_6\text{ClO}_4^+$   $[\text{M}+\text{H}]^+$  212.9949, found 212.9953.

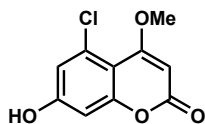

**5-chloro-7-hydroxy-4-methoxy-2H-chromen-2-one (15).** To a solution of 5-chloro-4,7-dihydroxy-2H-chromen-2-one (**S5**, 88.0 mg, 0.41 mmol, 1.00 equiv) in MeOH (4.6 mL) was added H<sub>2</sub>SO<sub>4</sub> (0.46 mL). The reaction was heated at 75 °C for 3.7 h. Incubation at 0 °C induced the precipitation of a white solid which was isolated by vacuum filtration to afford 56.9 mg of the title compound (61% yield). **MP** = >310 °C; **R<sub>f</sub>** = 0.49 (8:3:1 toluene/ethyl acetate/formic acid v/v); **<sup>1</sup>H NMR** (600 MHz, DMSO-*d*<sub>6</sub>) δ 10.98 (br s, 1H), 6.82 (d, *J* = 2.3, 1H), 6.68 (d, *J* = 2.3, 1H), 5.71 (s, 1H), 3.93 (s, 3H); **<sup>13</sup>C NMR** (150 MHz, DMSO-*d*<sub>6</sub>) δ 166.8, 160.9, 160.5, 156.2, 130.6, 115.9, 105.1, 102.2, 88.0, 56.8; **IR** (thin film, cm<sup>-1</sup>) 3139, 2728, 2161, 2033, 1698, 1613, 1593, 1522, 1449, 1433; **HRMS** (ESI) *m/z* calculated for C<sub>10</sub>H<sub>8</sub>ClO<sub>4</sub><sup>+</sup> [M+H]<sup>+</sup> 227.0106, found 227.0112.

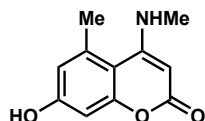

**7-hydroxy-5-methyl-4-(methylamino)-2H-chromen-2-one (16).** To a solution of 4,7-dihydroxy-5-methyl-2H-chromen-2-one (**S1**, 423 mg, 2.2 mmol, 1.0 equiv) in MeCN (8.8 mL) was added benzyl triethylammonium chloride (2.0 g, 8.9 mmol, 4.0 equiv). The solution was heated at 40 °C for 10 min then POCl<sub>3</sub> (910 μL, 9.7 mmol, 4.4 equiv) was added. The reaction was heated at 90 °C for 1.0 h. The reaction was quenched by pouring into ice water and extracted with ethyl acetate (3x). The organic layers were combined, washed with brine, dried over Na<sub>2</sub>SO<sub>4</sub>, filtered, and evaporated under reduced pressure to afford an oil, which was carried forward without further purification and dissolved in EtOH (12.7 mL) in a pressure vessel. To the crude solution was added triethylamine (4.20 mL) and methylamine hydrochloride (1.49 g, 22.1 mmol, 10.0 equiv). The reaction was heated at 80 °C for 14.5 h. The reaction was quenched by pouring into 1 M HCl and extracted with ethyl acetate (3x). The organic layers were combined, washed with brine, dried over Na<sub>2</sub>SO<sub>4</sub>, filtered, and evaporated under reduced pressure to afford 88.7 mg of the title compound (20% yield) as an orange solid. **MP** 279.3-283.6 °C; **R<sub>f</sub>** = 0.17 (8:3:1 toluene/ethyl acetate/formic acid v/v); **<sup>1</sup>H NMR** (600 MHz, CD<sub>3</sub>OD) δ 8.46 (s, 1H), 6.59 (d, *J* = 2.5, 1H), 6.54 (d, *J* = 2.6, 1H), 5.08 (s, 1H), 2.95 (s, 3H), 2.71 (s, 3H); **<sup>13</sup>C NMR** (150 MHz, CD<sub>3</sub>OD) δ 166.6, 161.5, 160.2, 157.9, 137.9, 117.8, 107.5, 102.5, 80.5, 30.5, 23.4; **HRMS** (ESI) *m/z* calculated for C<sub>11</sub>H<sub>12</sub>NO<sub>3</sub><sup>+</sup> [M+H]<sup>+</sup> 206.0812, found 206.0820.

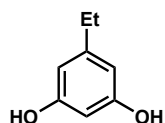

**5-ethylbenzene-1,3-diol (S6).** The title compound was prepared from 1-(3,5-dihydroxyphenyl)ethan-1-one according to the procedure described by Linusson et al.<sup>8</sup> **<sup>1</sup>H NMR** (400 MHz, acetone-*d*<sub>6</sub>) δ 8.01 (s, 2H), 6.19 (d, *J* = 1.9, 2H), 6.17 (d, *J* = 2.1, 1H), 2.46 (q, *J* = 7.6, 2H), 1.14 (t, *J* = 7.6, 3H). All spectra obtained were consistent with literature values.<sup>8</sup>

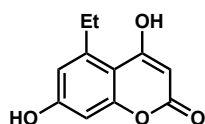

**5-ethyl-4,7-dihydroxy-2H-chromen-2-one (S7).** To a mixture of 5-ethylbenzene-1,3-diol (**S6**, 800.2 mg, 5.791 mmol, 1.000 equiv), malonic acid (602.6 mg, 5.791 mmol, 1.000 equiv) and ZnCl<sub>2</sub> flame-dried under vacuum (2.446 g, 17.95 mmol, 3.100 equiv) was added POCl<sub>3</sub> (14.5 mL). The reaction was heated at 60 °C and stirred for 14.5 h. The reaction was quenched by pouring into ice water and induced the precipitation of a solid, which was isolated by vacuum filtration. The crude solid was purified by flash column chromatography (8:3:1 to 6:5:1 toluene/ethyl acetate/formic acid v/v) to afford a 183.5 mg of the title compound (15% yield) as a tan solid with minor impurities. **MP** = 234.1-236.8 °C; **R<sub>f</sub>** = 0.43 (8:3:1 toluene/ethyl acetate/formic acid v/v); **<sup>1</sup>H NMR** (600 MHz,

DMSO-*d*<sub>6</sub>) δ 12.11 (s, 1H), 10.41 (s, 1H), 6.57 (d, *J* = 2.4, 1H), 6.51 (d, *J* = 2.4, 1H), 5.36 (s, 1H), 2.99 (q, *J* = 7.4, 2H), 1.15 (t, *J* = 7.4, 3H); <sup>13</sup>C NMR (150 MHz, DMSO-*d*<sub>6</sub>) δ 168.7, 161.8, 160.6, 157.2, 145.2, 114.4, 105.7, 100.6, 88.3, 28.2, 16.5; IR (thin film, cm<sup>-1</sup>) 3086, 2971, 2599, 1646, 1598, 1555, 1510, 1437; HRMS (ESI) *m/z* calculated for C<sub>11</sub>H<sub>11</sub>O<sub>4</sub><sup>+</sup> [M+H]<sup>+</sup> 207.0652, found 207.0651.

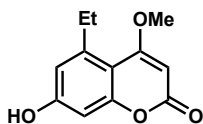

**5-ethyl-7-hydroxy-4-methoxy-2H-chromen-2-one (17).** To a solution of 5-ethyl-4,7-dihydroxy-2H-chromen-2-one (**S7**, 141.7 mg, 0.691 mmol, 1.000 equiv) in MeOH (7.7 mL) was added H<sub>2</sub>SO<sub>4</sub> (0.77 mL). The reaction was heated at 75 °C for 4.4 h. Incubation at 0 °C induced the precipitation of an orange solid which was isolated by vacuum filtration to afford 78.8 mg of the title compound (52% yield) as a tan solid with minor impurities. **MP** = 267.4-269.5 °C; **R<sub>f</sub>** = 0.48 (8:3:1 toluene/ethyl acetate/formic acid v/v); <sup>1</sup>H NMR (600 MHz, DMSO-*d*<sub>6</sub>) δ 10.45 (br s, 1H), 6.58 (d, *J* = 2.3, 1H), 6.54 (d, *J* = 2.3, 1H), 5.60 (s, 1H), 3.93 (s, 3H), 2.91 (q, *J* = 7.3, 2H), 1.12 (t, *J* = 7.4, 3H); <sup>13</sup>C NMR (150 MHz, DMSO-*d*<sub>6</sub>) δ 169.0, 161.7, 160.5, 156.2, 144.5, 114.7, 105.3, 100.6, 86.9, 56.5, 28.6, 16.1; IR (thin film, cm<sup>-1</sup>) 3286, 1689, 1621, 1606, 1560, 1421; HRMS (ESI) *m/z* calculated for C<sub>12</sub>H<sub>13</sub>O<sub>4</sub><sup>+</sup> [M+H]<sup>+</sup> 221.0808, found 221.0818.

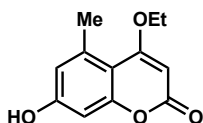

**4-ethoxy-7-hydroxy-5-methyl-2H-chromen-2-one (18).** To a solution of 4,7-dihydroxy-5-methyl-2H-chromen-2-one (**S1**, 510.0 mg, 2.650 mmol, 1.000 equiv) in EtOH (29.6 mL) was added H<sub>2</sub>SO<sub>4</sub> (2.9 mL). The reaction was heated at 75 °C for 9.5 h. Incubation at 0 °C induced the precipitation of a pale-yellow solid which was isolated by vacuum filtration to afford 237.6 mg of the title compound (41% yield). **MP** 276.5-278.2 °C; **R<sub>f</sub>** = 0.58 (8:3:1 toluene/ethyl acetate/formic acid v/v); <sup>1</sup>H NMR (600 MHz, DMSO-*d*<sub>6</sub>) δ 10.40 (br s, 1H), 6.54 (d, *J* = 2.4, 1H), 6.51 (d, *J* = 2.4, 1H), 5.50 (s, 1H), 4.12 (q, *J* = 7.0, 2H), 2.51 (s, 3H), 1.40 (t, *J* = 7.0, 3H); <sup>13</sup>C NMR (150 MHz, DMSO-*d*<sub>6</sub>) δ 168.3, 161.8, 160.2, 156.1, 138.2, 116.0, 106.0, 100.5, 86.8, 65.2, 23.1, 13.9; IR (thin film, cm<sup>-1</sup>) 3189, 1697, 1612, 1558, 1459, 1403; HRMS (ESI) *m/z* calculated for C<sub>12</sub>H<sub>13</sub>O<sub>4</sub><sup>+</sup> [M+H]<sup>+</sup> 221.0808, found 221.0813.

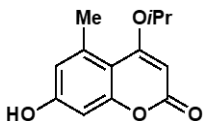

**7-hydroxy-4-isopropoxy-5-methyl-2H-chromen-2-one (19).** To a solution of 4,7-dihydroxy-5-methyl-2H-chromen-2-one (**S1**, 550.0 mg, 2.862 mmol, 1.000 equiv) in *i*-PrOH (32.0 mL) was added H<sub>2</sub>SO<sub>4</sub> (3.2 mL). The reaction was heated at 75 °C for 4.7 h. The solution was partially concentrated under reduced pressure, diluted with H<sub>2</sub>O and extracted with ethyl acetate (3x). The organic layers were combined, washed with brine, dried over Na<sub>2</sub>SO<sub>4</sub>, filtered, and evaporated under reduced pressure to afford a solid. The crude solid was purified by flash column chromatography (9:2:1 to 8:3:1 toluene/ethyl acetate/formic acid v/v) to afford 51.8 mg of the title compound (8% yield) as a tan solid. **MP** = 215.1-217.1 °C; **R<sub>f</sub>** = 0.51 (8:3:1 toluene/ethyl acetate/formic acid v/v); <sup>1</sup>H NMR (600 MHz, acetone-*d*<sub>6</sub>) δ 6.61 (d, *J* = 2.2, 1H), 6.56 (d, *J* = 2.5, 1H), 5.48 (s, 3H), 4.84 (heptd, *J* = 6.0, 2.7, 1H), 2.61 (s, 3H), 1.46 (d, *J* = 6.0, 6H); <sup>13</sup>C NMR (150 MHz, acetone-*d*<sub>6</sub>) δ 168.2, 162.7, 160.9, 157.8, 139.8, 116.7, 108.2, 101.5, 88.2, 73.0, 24.0, 21.8; IR (thin film, cm<sup>-1</sup>) 3207, 2980, 2933, 1683, 1599, 1556, 1452; HRMS (ESI) *m/z* calculated for C<sub>13</sub>H<sub>15</sub>O<sub>4</sub><sup>+</sup> [M+H]<sup>+</sup> 235.0965, found 235.0973.

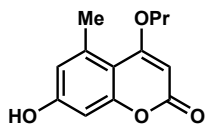

**7-hydroxy-5-methyl-4-propoxy-2H-chromen-2-one (20).** To a solution of 4,7-dihydroxy-5-methyl-2H-chromen-2-one (**S1**, 500.0 mg, 2.602 mmol, 1.000 equiv) in *i*-PrOH (29.0 mL) was added H<sub>2</sub>SO<sub>4</sub> (2.9 mL). The reaction was heated at 75 °C for 8.6 h. The solution was partially concentrated under reduced pressure, diluted with H<sub>2</sub>O, and extracted with ethyl acetate (3x). The organic layers were combined, washed with brine, dried over Na<sub>2</sub>SO<sub>4</sub>, filtered, and evaporated under reduced pressure to afford a solid. The crude solid was purified by flash column chromatography (8:3:1 toluene/ethyl acetate/formic acid v/v) and subjected to trituration (3x, 8:3:1 toluene/ethyl acetate/formic acid v/v) to afford 167.1 mg of the title compound (27% yield) as a tan solid. **MP** = 198.2-199.5 °C; **R<sub>f</sub>** = 0.50 (8:3:1 toluene/ethyl acetate/formic acid v/v); **<sup>1</sup>H NMR** (600 MHz, acetone-*d*<sub>6</sub>) δ 9.26 (s, 1H), 6.63 (dd, *J* = 2.6, 1.0, 1H), 6.57 (d, *J* = 2.5, 1H), 5.48 (s, 1H), 4.14 (t, *J* = 6.3, 2H), 2.63 (s, 3H), 1.98-1.87 (m, 2H), 1.10 (t, *J* = 7.4, 3H); **<sup>13</sup>C NMR** (150 MHz, acetone-*d*<sub>6</sub>) δ 169.7, 162.6, 161.1, 157.8, 139.7, 116.8, 108.0, 101.7, 88.2, 72.1, 23.9, 22.8, 11.1; **IR** (thin film, cm<sup>-1</sup>) 3148, 3090, 2974, 2935, 1709, 1697, 1689, 1625, 1451; **HRMS** (ESI) *m/z* calculated for C<sub>13</sub>H<sub>15</sub>O<sub>4</sub><sup>+</sup> [M+H]<sup>+</sup> 235.0965, found 235.0960.

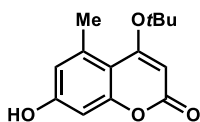

**4-(tert-butoxy)-7-hydroxy-5-methyl-2H-chromen-2-one (21).** To a solution of 4,7-dihydroxy-5-methyl-2H-chromen-2-one (**S1**, 25.0 mg, 0.121 mmol) in *t*-butanol (1.20 mL, 0.10 M) was added H<sub>2</sub>SO<sub>4</sub> (0.120 mL, 1.0 M) in a 10 mL cuvette. The reaction was heated at 120 °C for 1 h in a microwave reactor, rapidly forming a biphasic mixture. The reaction was quenched by the addition of water and extracted with ethyl acetate (3x). The organic layers were combined, washed with brine, dried over Na<sub>2</sub>SO<sub>4</sub>, and evaporated under reduced pressure to afford a yellow solid. The crude solid was purified over silica gel by flash chromatography (2% to 20% ethyl acetate in dichloromethane), to afford 8.9 mg (28% yield) of coumarin **21** as a glassy yellow film. **<sup>1</sup>H NMR** (600 MHz, acetone-*d*<sub>6</sub>) δ 6.60 (d, *J* = 2.5 Hz, 1H), 6.48 (d, *J* = 2.4 Hz, 1H), 6.16 (s, 1H), 2.53 (s, 3H), 1.01 (s, 9H). **<sup>13</sup>C NMR** (150 MHz, acetone-*d*<sub>6</sub>) δ 191.5, 167.4, 159.6, 159.3, 143.8, 116.1, 108.3, 102.0, 100.6, 67.0, 28.7, 21.9. **HRMS** (ESI) *m/z* calculated for C<sub>14</sub>H<sub>17</sub>O<sub>4</sub><sup>+</sup> [M+H]<sup>+</sup> 249.1121, found 249.1123.

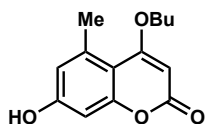

**4-butoxy-7-hydroxy-5-methyl-2H-chromen-2-one (22).** To a solution of 4,7-dihydroxy-5-methyl-2H-chromen-2-one (**S1**, 400.0 mg, 2.081 mmol, 1.000 equiv) in *n*-BuOH (23.3 mL) was added H<sub>2</sub>SO<sub>4</sub> (2.3 mL). The reaction was heated at 75 °C for 5.1 h. The solution was partially concentrated under reduced pressure, diluted with H<sub>2</sub>O, and extracted with ethyl acetate (3x). The organic layers were combined, washed with brine, dried over Na<sub>2</sub>SO<sub>4</sub>, filtered, and evaporated under reduced pressure to afford a solid. The crude solid was purified by flash column chromatography (9:2:1 to 8:3:1 toluene/ethyl acetate/formic acid v/v) and subjected to trituration (3x, 8:3:1 toluene/ethyl acetate/formic acid v/v) to afford 105.2 mg of the title compound (21% yield) as a white solid. **MP** = 196.7-197.8 °C; **R<sub>f</sub>** = 0.54 (8:3:1 toluene/ethyl acetate/formic acid v/v); **<sup>1</sup>H NMR** (600 MHz, CD<sub>3</sub>OD) δ 6.58 (d, *J* = 2.2, 1H), 6.54 (d, *J* = 2.2, 1H), 5.55 (s, 1H), 4.15 (t, *J* = 6.3, 2H), 2.61 (s, 3H), 1.92-1.84 (m, 2H), 1.57 (q, *J* = 7.5, 2H), 1.02 (t, *J* = 7.4); **<sup>13</sup>C NMR** (150 MHz, CD<sub>3</sub>OD) δ 171.5, 166.1, 162.2, 158.0, 140.2, 117.5, 108.0, 101.7, 87.5, 70.9, 31.8, 23.9, 20.5, 14.1; **IR** (thin film, cm<sup>-1</sup>) 3279, 3122, 2957, 2872, 1675, 1610, 1555, 1448, 1409; **HRMS** (ESI) *m/z* calculated for C<sub>14</sub>H<sub>17</sub>O<sub>4</sub><sup>+</sup> [M+H]<sup>+</sup> 249.1121, found 249.1124.



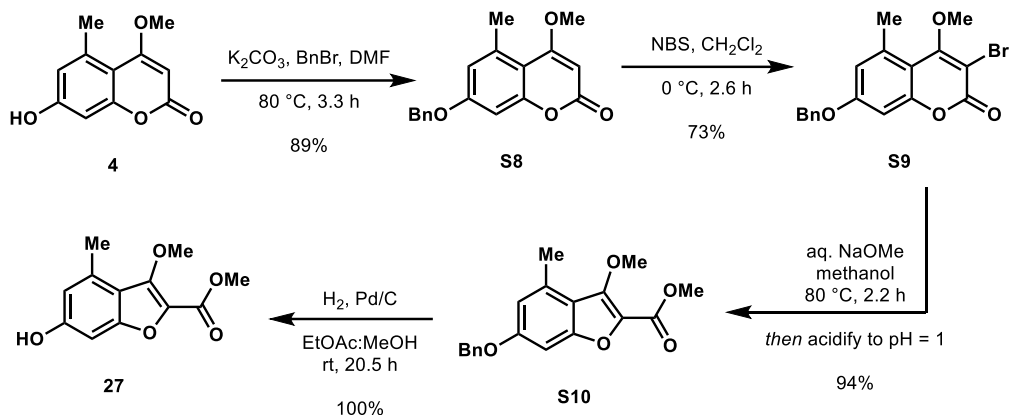

**Supplemental Scheme S1.** Synthesis of benzofuran **27**.

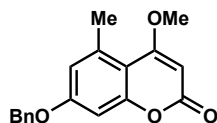

**7-(benzyloxy)-4-methoxy-5-methyl-2H-chromen-2-one (S8).** To a solution of 7-hydroxy-4-methoxy-5-methyl-2H-chromen-2-one (**4**; 1.07 g, 5.19 mmol, 1.00 equiv) in DMF (52.0 mL) was added  $K_2CO_3$  (1.07 g, 7.78 mmol, 1.50 equiv) and BnBr (740  $\mu$ L, 6.23 mmol, 1.20 equiv). The reaction was heated at 80 °C and stirred for 3.3 h. The reaction was quenched with MeOH (1 mL). Water was added and the aqueous phase was extracted with ethyl acetate (3x). The organic layers were combined, washed with brine, dried over  $Na_2SO_4$ , filtered, and evaporated under reduced pressure afford 1.37 g of the title compound (89% yield) as a white solid. **MP** = 137.5-138.7 °C; **R<sub>f</sub>** = 0.17 (2:1 hexanes/ethyl acetate v/v); **<sup>1</sup>H NMR** (600 MHz,  $CDCl_3$ )  $\delta$  7.41-7.34 (m, 4H), 7.33-7.29 (m, 1H), 6.65 (d,  $J$  = 2.6, 1H), 6.63 (d,  $J$  = 2.5, 1H), 5.47 (s, 1H), 5.03 (s, 2H), 3.86 (s, 3H), 2.55 (s, 3H); **<sup>13</sup>C NMR** (150 MHz,  $CDCl_3$ )  $\delta$  169.6, 163.0, 160.9, 156.5, 138.5, 135.9, 128.7, 128.2, 127.5, 116.1, 108.0, 99.6, 87.5, 70.1, 55.9, 23.4; **IR** (thin film,  $cm^{-1}$ ) 3089, 3063, 3032, 2975, 2935, 1711, 1601, 1555, 1497, 1455, 1423; **HRMS** (ESI)  $m/z$  calculated for  $C_{18}H_{17}O_4^+$  [ $M+H$ ]<sup>+</sup> 297.1121, found 297.1122.

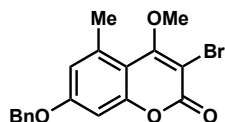

**7-(benzyloxy)-3-bromo-4-methoxy-5-methyl-2H-chromen-2-one (S9).** To a solution of 7-(benzyloxy)-4-methoxy-5-methyl-2H-chromen-2-one (**S8**, 600.0 mg, 2.02 mmol, 1.00 equiv) in  $CH_2Cl_2$  (25.0 mL) was added recrystallized *N*-bromosuccinimide (378 mg, 2.13 mmol, 1.05 equiv) at 0 °C. The reaction was stirred for 2.6 h. The reaction was quenched with saturated  $Na_2S_2O_3$  (5.0 mL). The aqueous phase was extracted with  $CH_2Cl_2$  (3x). The organic layers were combined, washed with brine, dried over  $Na_2SO_4$ , filtered, and evaporated under reduced pressure afford 555 mg of the title compound (73% yield) as a white solid. **MP** 118.3-121.5 °C; **R<sub>f</sub>** = 0.53 (2:1 hexanes/ethyl acetate v/v); **<sup>1</sup>H NMR** (600 MHz,  $CDCl_3$ )  $\delta$  7.42-7.33 (m, 5H), 6.76 (d, 2H), 5.11 (s, 2H), 4.09 (s, 3H), 2.65 (s, 3H); **<sup>13</sup>C NMR** (150 MHz,  $CDCl_3$ )  $\delta$  168.5, 161.4, 159.6, 155.4, 137.9, 135.7, 128.9, 128.5, 127.6, 117.2, 110.2, 99.9, 97.4, 70.5, 61.0, 22.6; **IR** (thin film,  $cm^{-1}$ ) 3089, 3063, 3032, 2972, 2939, 1715, 1612, 1588, 1538, 1497, 1453; **HRMS** (ESI)  $m/z$  calculated for  $C_{18}H_{16}BrO_4^+$  [ $M+H$ ]<sup>+</sup> 375.0226, found 375.0218.

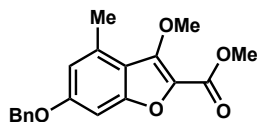

**Methyl 6-(benzyloxy)-3-methoxy-4-methylbenzofuran-2-carboxylate (S10).** To a suspension of 7-(benzyloxy)-3-bromo-4-methoxy-5-methyl-2H-chromen-2-one (**S9**; 418 mg, 1.11 mmol, 1.00 equiv) in MeOH (44.6 mL) was added freshly prepared 1M solution of NaOMe in MeOH (11.1 mL, 11.1 mmol, 10.0 equiv). The

reaction was heated at 80 °C and stirred for 2.2 h. The reaction was poured into 122 mL of 0.1 M HCl. The acidified aqueous phase was extracted with ethyl acetate (3x). The organic layers were combined, washed with brine, dried over Na<sub>2</sub>SO<sub>4</sub>, filtered, and evaporated under reduced pressure to afford 342 mg of the title compound (94% yield) as an off-white solid. **MP** = 57.9-58.8 °C; **R<sub>f</sub>** = 0.62 (2:1 hexanes/ethyl acetate v/v); **<sup>1</sup>H NMR** (400 MHz, CDCl<sub>3</sub>) δ 7.45-7.30 (m, 5H), 6.81 (d, *J* = 2.1, 1H), 6.74 (d, *J* = 2.1, 1H), 5.08 (s, 2H), 4.12 (s, 3H), 3.96 (s, 3H), 2.59 (s, 3H); **<sup>13</sup>C NMR** (100 MHz, CDCl<sub>3</sub>) δ 160.3, 159.6, 154.8, 152.4, 136.5, 134.5, 131.2, 128.8, 128.2, 127.5, 115.3, 94.4, 70.4, 63.1, 52.0, 18.2; **IR** (thin film, cm<sup>-1</sup>) 3033, 2950, 2851, 1708, 1621, 1598, 1573, 1498, 1446; **HRMS** (ESI) *m/z* calculated for C<sub>19</sub>H<sub>9</sub>O<sub>5</sub><sup>+</sup> [M+H]<sup>+</sup> 327.1227, found 327.1231.

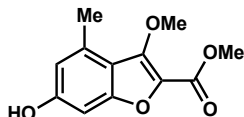

**Methyl 6-hydroxy-3-methoxy-4-methylbenzofuran-2-carboxylate (27).** A solution of methyl 6-(benzyloxy)-3-methoxy-4-methylbenzofuran-2-carboxylate (**S10**; 502 mg, 0.923 mmol, 1.00 equiv) in MeOH (30.0 mL) was sparged with N<sub>2</sub> for 15 min then 10% Pd/C (30 mg, 10% w/w) as a slurry in ethyl acetate (1.0 mL). The reaction was sparged with N<sub>2</sub> for 10 min then sparged with H<sub>2</sub> for 10 min and stirred for 20.5 h under H<sub>2</sub> balloon atmosphere. The reaction was filtered through a plug of celite, rinsed with ethyl acetate, and the organic solution evaporated under reduced pressure. The crude solid was purified through a silica plug with flash chromatography (ethyl acetate) to afford 220 mg of the title compound (quantitative yield) as a light pink solid. **MP** 137.6-140.2 °C; **R<sub>f</sub>** = 0.45 (2:1 hexanes/ethyl acetate v/v); **<sup>1</sup>H NMR** (600 MHz, CD<sub>3</sub>OD) δ 6.58 (d, *J* = 1.0, 1H), 6.54 (d, *J* = 1.0, 1H), 4.04 (s, 3H), 3.89 (s, 3H), 2.51 (s, 3H); **<sup>13</sup>C NMR** (150 MHz, CD<sub>3</sub>OD) δ 161.2, 160.6, 156.5, 153.6, 135.4, 131.8, 115.7, 115.1, 96.0, 63.5, 52.1, 18.1; **IR** (thin film, cm<sup>-1</sup>) 3365, 2952, 2852, 1682, 1619, 1600, 1575, 1448; **HRMS** (ESI) *m/z* calculated for C<sub>12</sub>H<sub>13</sub>O<sub>5</sub><sup>+</sup> [M+H]<sup>+</sup> 237.0757, found 237.0762.

Compounds **11–12** and **28–31** are commercially available.

## Synthesis of authentic product standards

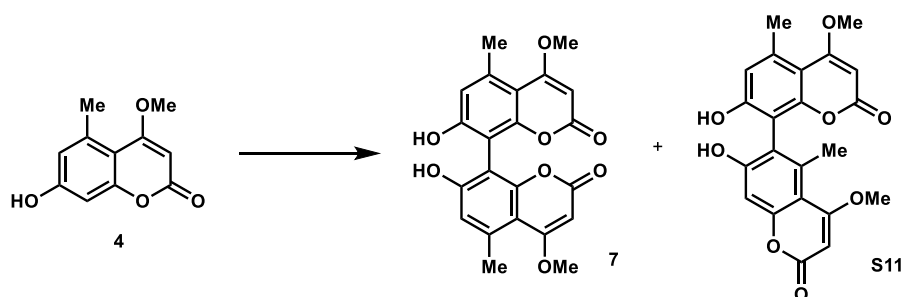

**Chemical dimerization of 7-hydroxy-4-methoxy-5-methyl-2H-chromen-2-one (4) to produce racemic product mixtures (7 and S11).** To a solution of 7-hydroxy-5-methyl-4-propoxy-2H-chromen-2-one (**4**; 51.5 mg, 0.250 mmol, 1.00 equiv) in CH<sub>2</sub>Cl<sub>2</sub> (1.0 mL) and trifluoroacetic acid (0.25 mL) was added VOF<sub>3</sub> (124 mg, 0.375 mmol, 1.50 equiv) at 0 °C. The reaction was stirred for 4.0 h. The reaction was quenched with H<sub>2</sub>O (2 mL). The aqueous phase was extracted with ethyl acetate (3x). The organic layers were combined, washed with brine, dried over Na<sub>2</sub>SO<sub>4</sub>, filtered, and evaporated under reduced pressure. The crude solid was purified by flash column chromatography (8:3:1 toluene/ethyl acetate/formic acid v/v) then reverse-phase HPLC (Phenomenex Kinetex 5 μm C18, 150 x 21.2 mm column) under the following conditions: mobile phase A = deionized water + 0.1% formic acid and B = acetonitrile + 0.1% formic acid; method = 75% A for 5.0 min, 75% A to 70% A over 2.0 min, 70% A for 7.0 min, 70% A to 65% A over 2.0 min, 65% A for 5.0 min, 65% A to 50% A over 3.0 min, 50% A for 1.0 min, 254 and 308 nm UV detection and 14 mL/min flow rate. A retention time of 12.65-14.77 min afforded 7.0 mg of 8,8'-product **7** (14% yield), and a retention time of 18.44-20.07 min afforded 6.6 mg of 6,8'-product **S11** (13% yield).

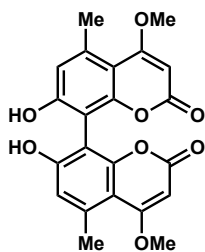

**7,7'-dihydroxy-4,4'-dimethoxy-5,5'-dimethyl-2H,2H'-[8,8'-bichromene]-2,2'-dione (7).** <sup>1</sup>H NMR (400 MHz, DMSO-*d*<sub>6</sub>) δ 6.69 (s, 2H), 5.55 (s, 2H), 3.94 (s, 6H), 2.59 (s, 6H); HRMS (ESI) *m/z* calculated for C<sub>22</sub>H<sub>19</sub>O<sub>8</sub><sup>+</sup> [M+H]<sup>+</sup> 411.1074, found 411.1070. All spectra obtained were in agreement with literature values.<sup>9</sup>

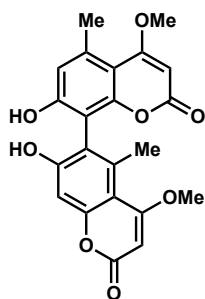

**7,7'-dihydroxy-4,4'-dimethoxy-5,5'-dimethyl-2H,2H'-[6,8'-bichromene]-2,2'-dione (S11).** <sup>1</sup>H NMR (400 MHz, DMSO-*d*<sub>6</sub>) δ 6.70 (s, 1H), 6.68 (s, 1H), 5.63 (s, 1H), 5.57 (s, 1H), 3.93 (s, 6H), 2.58 (s, 3H), 2.23 (s, 3H); HRMS (ESI) *m/z* calculated for C<sub>22</sub>H<sub>19</sub>O<sub>8</sub><sup>+</sup> [M+H]<sup>+</sup> 411.1074, found 411.1088. All spectra obtained were in agreement with literature values.<sup>10</sup>

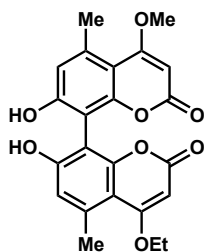

**4-ethoxy-7,7'-dihydroxy-4'-methoxy-5,5'-dimethyl-2H,2H-[8,8'-bichromene]-2,2'-dione (23).** To a suspension of 7,7'-dihydroxy-4,4'-dimethoxy-5,5'-dimethyl-2H,2H-[8,8'-bichromene]-2,2'-dione (**7**, 25 mg, 0.061 mmol, 1.000 equiv) in MeOH (5.0 mL) and EtOH (5.0 mL) was added ground 3 Å molecular sieves (100 mg) and H<sub>2</sub>SO<sub>4</sub> (500 µL). The reaction was heated at 75 °C and stirred for 38.7 h. The reaction was cooled, diluted with ethyl acetate, and poured into water. The aqueous phase was extracted with ethyl acetate (3x). The organic layers were combined, washed with brine, dried over Na<sub>2</sub>SO<sub>4</sub>, filtered, and evaporated under reduced pressure. The crude solid was purified by reverse-phase HPLC (Phenomenex Kinetex 5 µm C18, 150 x 21.2 mm column) under the following conditions: mobile phase A = deionized water + 0.1% formic acid and B = acetonitrile + 0.1% formic acid; method = 70% A for 5 min, 70% A to 65% A over 2.0 min, 65% A for 5 min, 65% A to 60% A over 2.0 min, 60% A for 5 min, 60% A to 40% A over 5 min, 40% A for 2 min, 40% A to 10% A over 4 min, 10% A for 1 min, 254 and 308 nm UV detection and 12 mL/min flow rate. The 8,8'-product, **23**, eluted from 9.8-12.0 min to provide 7 mg of material (27% yield) with minor impurities. <sup>1</sup>H NMR (400 MHz, acetone-*d*<sub>6</sub>) δ 6.77 (s, 2H), 5.50 (s, 1H), 5.45 (s, 1H), 4.25 (q, *J* = 7.0, 2H), 4.02 (s, 3H), 2.68 (s, 3H), 2.64 (s, 3H), 1.54 (t, *J* = 7.0, 3H); HRMS (ESI) *m/z* calculated for C<sub>23</sub>H<sub>21</sub>O<sub>8</sub><sup>+</sup> [M+H]<sup>+</sup> 425.1231, 425.1235; <sup>13</sup>C NMR (150 MHz, DMSO-*d*<sub>6</sub>) δ 169.7, 168.7, 161.8, 161.7, 158.7, 158.7, 154.0, 154.0, 137.1, 137.0, 115.7, 115.7, 106.0, 106.0, 105.8, 105.8, 86.6, 86.4, 65.3, 56.5, 23.4, 23.2, 14.0.

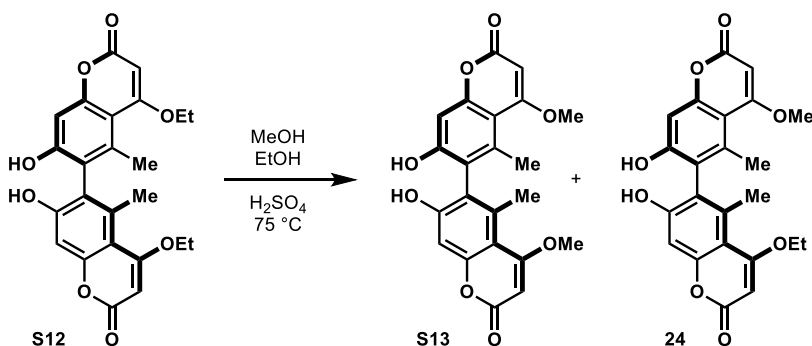

**7,7'-dihydroxy-4,4'-dimethoxy-5,5'-dimethyl-2H,2H-[6,6'-bichromene]-2,2'-dione (S13) and 4-ethoxy-7,7'-dihydroxy-4'-methoxy-5,5'-dimethyl-2H,2H-[6,6'-bichromene]-2,2'-dione (24).** To a suspension of 4,4'-diethoxy-7,7'-dihydroxy-5,5'-dimethyl-2H,2H-[6,6'-bichromene]-2,2'-dione (**S12**, 10 mg, 0.023 mmol, 1.0 equiv) in MeOH (2.5 mL) and EtOH (2.5 mL) was added ground 3 Å molecular sieves (40.0 mg) and H<sub>2</sub>SO<sub>4</sub> (250 µL). The reaction was heated at 75 °C for 10.6 h. The reaction was quenched by diluting with ethyl acetate and pouring into water. The aqueous layer was extracted with ethyl acetate (3x), washed with brine, dried over Na<sub>2</sub>SO<sub>4</sub>, filtered, and evaporated under reduced pressure. The crude solids were purified by reverse-phase HPLC (Phenomenex Kinetex 5 µm C18, 150 x 21.2 mm column) under the following conditions: mobile phase A = deionized water + 0.1% formic acid and B = acetonitrile + 0.1% formic acid; method = 70% A for 5 min, 70% A to 65% A over 2.0 min, 65% A for 5.0 min, 65% A to 60% A over 2.0 min, 60% A for 5.0 min, 60% A to 40% A over 5.0 min, 40% A for 2.0 min, 40% A to 10% A over 4.0 min, 10% A for 1.0 min, 254 and 308 nm UV detection and 12 mL/min flow rate. A retention time of 12.05-14.55 min afforded 1.5 mg of 6,6' product **S13** (16% yield), and a retention time of 16.57-19.55 afforded 2.0 mg of 6,6' cross-coupled product **24** (20% yield).

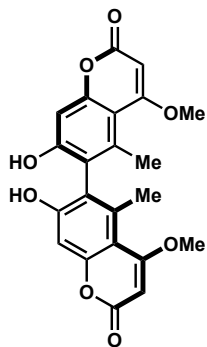

**7,7'-dihydroxy-4,4'-dimethoxy-5,5'-dimethyl-2H,2H-[6,6'-bichromene]-2,2'-dione (S13).**  $^1\text{H NMR}$  (400 MHz,  $\text{CD}_3\text{OD}$ )  $\delta$  6.71 (s, 2H), 5.65 (s, 2H), 3.99 (s, 6H), 2.30 (s, 6H); **HRMS** (ESI)  $m/z$  calculated for  $\text{C}_{22}\text{H}_{19}\text{O}_8^+$   $[\text{M}+\text{H}]^+$  411.1074, found 411.0990. All spectra obtained were in agreement with literature values.<sup>11</sup>

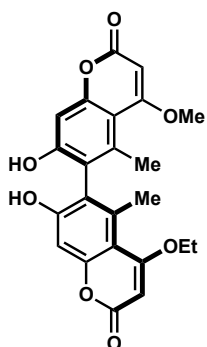

**4-ethoxy-7,7'-dihydroxy-4'-methoxy-5,5'-dimethyl-2H,2H-[6,6'-bichromene]2,2'-dione (24).**  $^1\text{H NMR}$  (600 MHz,  $\text{CD}_3\text{OD}$ )  $\delta$  6.71 (s, 2H), 5.65 (s, 1H), 5.61 (s, 1H), 4.24 (q,  $J=7.0$ , 2H), 3.99 (s, 3H), 2.33 (s, 3H), 2.30 (s, 3H), 1.51 (t,  $J=7.0$ , 3H);  $^{13}\text{C NMR}$  (200 MHz,  $\text{CD}_3\text{OD}$ )  $\delta$  172.6, 171.7, 166.1, 165.9, 160.4, 160.4, 157.4, 157.3, 139.4, 139.3, 124.4, 108.4, 101.6, 101.5, 87.8, 87.5, 66.9, 56.9, 40.4, 19.4, 19.3, 14.5. **HRMS** (ESI)  $m/z$  calculated for  $\text{C}_{23}\text{H}_{21}\text{O}_8^+$   $[\text{M}+\text{H}]^+$  425.1231, found 425.1255.

Compounds **25–26** are present in the following section: “Analytical scale generation of cross-coupled product standards.” See pages S25 and S27.

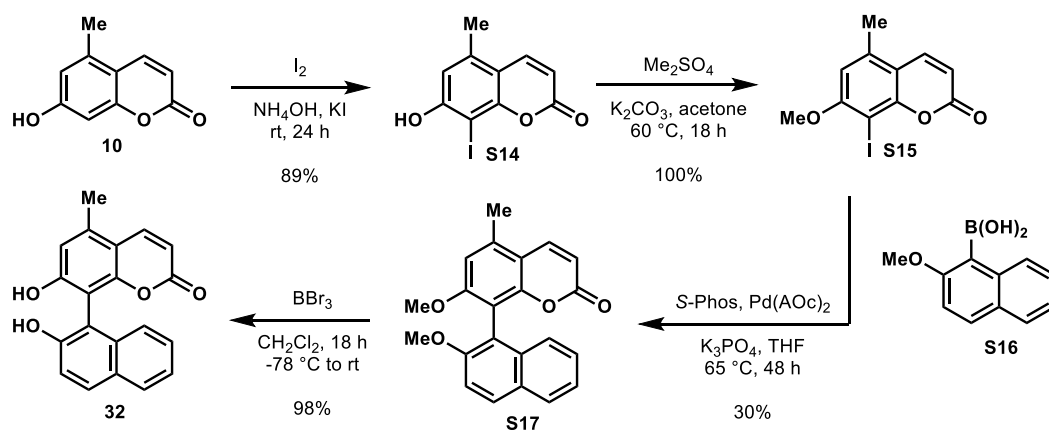

**Supplemental Scheme S2.** Synthesis of 8,1'-cross-coupled product **32**.

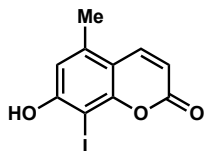

**7-hydroxy-8-iodo-5-methyl-2H-chromen-2-one (S14).** Coumarin (**10**; 750 mg, 4.26 mmol, 1.00 equiv) was dissolved in 20% aqueous solution of  $\text{NH}_4\text{OH}$  (17.0 mL, 0.250 M) at room temperature in a round bottom flask open to air.  $\text{I}_2$  (1.08 g, 4.26 mmol, 1.000 equiv) was dissolved in an 5.0% KI solution (8.50 mL, 0.125 M), and added dropwise to the reaction flask. The reaction was stirred at rt for 48 h, until complete by TLC. The reaction was acidified to a pH of approximately 2.0 with 6M  $\text{H}_2\text{SO}_4$ , where the product precipitated as an off-white solid. The solid was collected by vacuum filtration and dried under vacuum and carried forward without further purification, 1.15 g, 89% yield.  $^1\text{H NMR}$  (600 MHz,  $\text{DMSO}-d_6$ )  $\delta$  11.29 (s, 1H), 8.02 (d,  $J = 9.7$  Hz, 1H), 6.75 (s, 1H), 6.23 (d,  $J = 9.6$  Hz, 1H), 2.41 (s, 3H);  $^{13}\text{C NMR}$  (151 MHz,  $\text{DMSO}-d_6$ )  $\delta$  160.6, 160.2, 155.4, 141.8, 137.9, 113.2, 111.2, 111.1, 71.3, 18.0; **HRMS** (ESI)  $m/z$  calculated for  $\text{C}_{10}\text{H}_8\text{IO}_3^+$   $[\text{M}+\text{H}]^+$  302.9513, found 302.9513.<sup>12</sup>

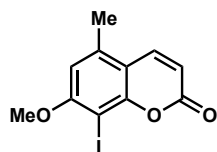

**8-iodo-7-methoxy-5-methyl-2H-chromen-2-one (S15).** Iodocoumarin (**S14**; 100 mg, 0.33 mmol, 1.0 equiv) and  $\text{K}_2\text{CO}_3$  (183 mg, 1.32 mmol, 4.00 equiv) were added to a dry 1 dram vial. Dry acetone (0.7 mL, 0.5 M) was added at rt followed by  $\text{Me}_2\text{SO}_4$  (79  $\mu\text{L}$ , 0.83 mmol, 2.5 equiv). The reaction was heated to reflux and allowed to stir overnight 16 h. The reaction was cooled to rt, and quenched by stirring with dilute HCl (1 mL) for 10 min at rt. The reaction was then extracted with ethyl acetate (20 mL x 3), the extracts were combined, washed with brine, dried over  $\text{Na}_2\text{SO}_4$ , and concentrated to an off-white solid, (104 mg, quantitative yield). The product was carried forward to the next step without further purification.  $^1\text{H NMR}$  (600 MHz,  $\text{CDCl}_3$ )  $\delta$  7.76 (d,  $J = 9.7$  Hz, 1H), 6.65 (s, 1H), 6.24 (d,  $J = 9.7$  Hz, 1H), 3.97 (s, 3H), 2.51 (s, 3H);  $^{13}\text{C NMR}$  (150 MHz,  $\text{CDCl}_3$ )  $\delta$  161.2, 160.7, 155.4, 140.3, 137.9, 113.3, 112.8, 109.3, 73.0, 57.0, 19.0; **HRMS** (ESI)  $m/z$  calculated for  $\text{C}_{11}\text{H}_{10}\text{IO}_3^+$   $[\text{M}+\text{H}]^+$  316.9669, found 316.9671.

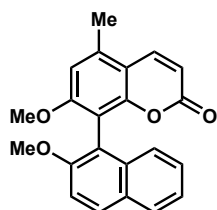

**7-methoxy-8-(2-methoxynaphthalen-1-yl)-5-methyl-2H-chromen-2-one (S17).** Coumarin (**S15**, 50.0 mg, 0.166 mmol, 1.00 equiv), commercial 2-methoxy-naphthalene-1-boronic acid (**S16**; 66.9 mg, 0.331 mmol, 2.00 equiv),  $\text{K}_3\text{PO}_4$  (105.4 mg, 0.497 mmol, 3.00 equiv), and approximately 5 mg activated 4 Å mol sieves were added to a dry round bottom flask. A stock solution of  $\text{Pd}(\text{OAc})_2$  (1.9 mg, 8.3  $\mu\text{mol}$ , 5 mol %), and *S*-Phos (6.8 mg, 17 mmol, 10 mol %) in dry toluene (2 mL, 0.083 M) was prepared and stirred for 20 min at rt before transferring to the reaction vessel and heating to 110 °C. The reaction was monitored by TLC over 72 h. The reaction was cooled to rt, and passed through a silica plug with 1:1 ethyl acetate: hexanes as eluent, then concentrated to afford a golden solid. The crude material was purified by column chromatography using 0 to 30% ethyl acetate in hexanes. The desired product was recovered as 17 mg of a white glassy solid in a 30% yield.  $^1\text{H NMR}$  (800 MHz, acetone- $d_6$ )  $\delta$  8.15 (d,  $J = 9.7$  Hz, 1H), 8.00 (d,  $J = 9.0$  Hz, 1H), 7.88 (d,  $J = 8.6$  Hz, 0H), 7.53 (d,  $J = 9.0$  Hz, 1H), 7.31 (qt,  $J = 6.6, 3.3$  Hz, 2H), 7.23 (d,  $J = 8.3$  Hz, 0H), 7.12 (s, 1H), 6.17 (d,  $J = 9.8$  Hz, 1H), 3.83 (s, 3H), 3.75 (s, 3H), 2.68 (s, 3H);  $^{13}\text{C NMR}$  (200 MHz, acetone- $d_6$ )  $\delta$  160.4, 160.0, 155.2, 153.9, 141.0, 137.6, 133.6, 129.7, 129.3, 128.0, 126.2, 124.5, 123.3, 115.5, 114.0, 112.0, 111.9, 110.8, 109.6, 56.0, 55.6, 18.0; **HRMS** (ESI)  $m/z$  calculated for  $\text{C}_{22}\text{H}_{19}\text{O}_4^+$   $[\text{M}+\text{H}]^+$  347.1278, found 347.1261.

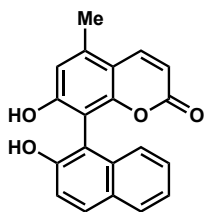

**7-hydroxy-8-(2-hydroxynaphthalen-1-yl)-5-methyl-2H-chromen-2-one (32).** Biaryl (**S17**, 17 mg, 49  $\mu\text{mol}$ , 1.0 equiv) was dissolved in dry  $\text{CH}_2\text{Cl}_2$  (0.5 mL, 0.1 M) in a dry round bottom flask and cooled to  $-78^\circ\text{C}$ . A solution of 1 M  $\text{BBr}_3$  in  $\text{CH}_2\text{Cl}_2$  (200  $\mu\text{L}$ , 200  $\mu\text{mol}$ , 4.0 equiv) was added slowly, and the reaction was allowed to warm to room temperature and stir overnight. The reaction was quenched by the addition of water and pH adjusted to approximately 4 with aqueous saturated sodium bicarbonate, then extracted with ethyl acetate (10 mL x 3). The extracts were combined, washed with brine, dried over  $\text{Na}_2\text{SO}_4$ , and concentrated to an off-white solid as 15.3 mg of the target compound was isolated without further purification in a 98% yield.  $^1\text{H NMR}$  (600 MHz,  $\text{CD}_3\text{OD}$ )  $\delta$  8.17 (d,  $J = 9.6$  Hz, 1H), 7.80 (t,  $J = 9.1$  Hz, 2H), 7.26 (ddd,  $J = 6.9, 4.5, 1.8$  Hz, 2H), 7.22 (d,  $J = 8.8$  Hz, 1H), 7.21 – 7.16 (m, 1H), 6.88 (s, 1H), 6.18 (d,  $J = 9.6$  Hz, 1H), 2.59 (s, 3H);  $^{13}\text{C NMR}$  (150 MHz,  $\text{CD}_3\text{OD}$ )  $\delta$  162.9, 159.4, 154.6, 152.8, 142.2, 137.35, 134.0, 129.3, 128.8, 127.6, 125.8, 123.7, 122.3, 117.7, 114.2, 111.3, 111.2, 109.9, 108.9, 17.1; **HRMS** (ESI)  $m/z$  calculated for  $\text{C}_{20}\text{H}_{15}\text{O}_4^+$   $[\text{M}+\text{H}]^+$  319.0965, found 319.0970.

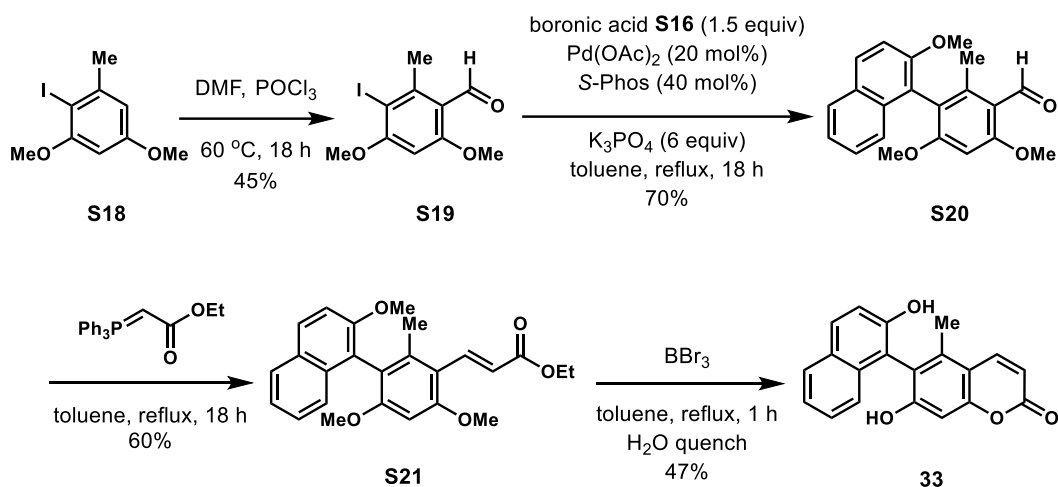

**Supplemental Scheme S3.** Synthesis of 3,1'-cross-coupled product **33**.

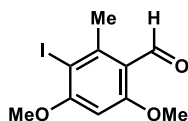

**3-iodo-4,6-dimethoxy-2-methylbenzaldehyde (S19).** To an oven-dried 50 mL round-bottomed flask charged with a stir bar was added dry dimethylformamide (5 mL) under dry nitrogen atmosphere. The reaction mixture was cooled to  $0^\circ\text{C}$  using an ice bath and  $\text{POCl}_3$  (0.94 mL, 10.1 mmol, 2.00 equiv) was added dropwise. The ice bath was removed, and the resultant mixture was stirred at room temperature for 1 h. Subsequently, a solution of 1,3-dimethoxy-5-methylbenzene (**S18**, synthesized via iodination of 3,5-dimethoxytoluene using *N*-iodosuccinimide; 1.40 g, 5.03 mmol, 1.00 equiv) in dry dimethylformamide (5 mL) was added to the reaction flask and the resultant mixture was stirred at  $60^\circ\text{C}$  for 18 h. Afterwards, the reaction mixture was quenched with the addition of ice, basified to pH 13 using 10 M  $\text{KOH}$  and stirred at room temperature for 30 min. The reaction mixture was subsequently acidified to pH 2 using 5 M  $\text{HCl}$  and extracted with ethyl acetate (2 x 20 mL). The combined organic fractions were washed with water (20 mL), brine (20 mL), dried over anhydrous  $\text{Na}_2\text{SO}_4$  and concentrated in vacuum. Flash chromatography over silica gel (gradient of 5-60% ethyl acetate in hexanes) to afford the desired product **S19** (692 mg, 45% yield) as a yellow solid. TLC analysis (30% ethyl acetate in Hexanes)  $R_f = 0.5$ ;  $^1\text{H NMR}$  (600 MHz,  $\text{CDCl}_3$ )  $\delta$  10.34 (1H, s), 6.32 (1H, s), 3.95 (3H, s), 3.92 (3H, s), 2.78 (3H,

s) ppm;  $^{13}\text{C}$  NMR (150 MHz,  $\text{CDCl}_3$ )  $\delta$  190.2, 165.3, 162.4, 146.3, 118.4, 92.6, 87.5, 56.6, 55.9, 26.2 ppm; HRMS (ESI) (M+H) $^+$  calculated for  $\text{C}_9\text{H}_{12}\text{O}_2^+$  = 306.9826, found = 306.9795 *m/z*.

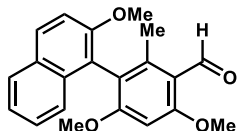

**4,6-dimethoxy-3-(2-methoxynaphthalen-1-yl)-2-methylbenzaldehyde (S20).** To an oven-dried 50 mL round bottomed charged with a stir bar was added aryl iodide **S19** (200 mg, 0.65 mmol, 1.0 equiv), 2-methoxynaphthalene-1-boronic acid (**S16**; 198 mg, 0.980 mmol, 1.50 equiv),  $\text{K}_3\text{PO}_4$  (827 mg, 3.90 mmol, 6.00 equiv),  $\text{Pd}(\text{OAc})_2$  (29 mg, 0.13 mmol, 0.20 equiv) and *S*-Phos (107 mg, 0.260 mmol, 0.400 equiv). A reflux condenser and a Teflon septa were added and the resultant mixture was subjected to vacuum and then refilled with nitrogen. The degas cycle was carried out for a total of 5 times, following which dry toluene (13 mL) was added and the resultant mixture was stirred at room temperature for 30 min. The mixture was subsequently heated to reflux and was allowed to stir at 110 °C for a total of 18 h. Afterwards, the reaction mixture was cooled to room temperature and was quenched by the addition of saturated aqueous  $\text{NH}_4\text{Cl}$  (13 mL) and was extracted with ethyl acetate (2 x 20 mL). The combined organic layers were washed with brine (10 mL) and were concentrated under vacuum. Flash chromatography over silica gel (gradient of 5-70% ethyl acetate in hexanes) afforded the desired product **S20** (152 mg, 70% yield) as a waxy solid. TLC (35% ethyl acetate in hexanes)  $R_f$  = 0.5;  $^1\text{H}$  NMR (600 MHz,  $\text{CDCl}_3$ )  $\delta$  10.66 (s, 1H), 7.90 (d,  $J$  = 9.0 Hz, 1H), 7.86 – 7.81 (m, 1H), 7.38 (d,  $J$  = 9.1 Hz, 1H), 7.32 (ddt,  $J$  = 9.7, 6.7, 3.3 Hz, 2H), 7.25 – 7.19 (m, 1H), 6.51 (s, 1H), 4.00 (s, 3H), 3.83 (s, 3H), 3.69 (s, 3H), 2.20 (s, 3H) ppm;  $^{13}\text{C}$  NMR (150 MHz,  $\text{CDCl}_3$ )  $\delta$  191.1, 165.1, 162.9, 154.5, 143.4, 133.6, 129.3, 129.1, 128.1, 126.4, 124.5, 123.5, 119.5, 118.8, 117.3, 113.7, 92.5, 56.7, 55.8, 55.8, 17.7 ppm; HRMS (ESI) (M+H) $^+$  calculated for  $\text{C}_{21}\text{H}_{21}\text{O}_4^+$  = 337.1434, found = 337.1436 *m/z*.

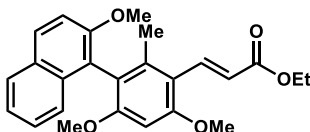

**Ethyl (E)-3-(4,6-dimethoxy-3-(2-methoxynaphthalen-1-yl)-2-methylphenyl)acrylate (S21).** A mixture of aldehyde intermediate **S20** (152 mg, 0.450 mmol) and Wittig reagent ethyl (triphenylphosphoranylidene)acetate (199 mg, 0.57 mmol, 1.20 equiv) were dissolved in toluene (4.5 mL) and the resultant mixture was refluxed under nitrogen for 18 h. Afterwards, the reaction mixture was concentrated under reduced pressure. Flash chromatography over silica gel (gradient of 5-50% ethyl acetate in hexanes) afforded the desired product **S21** (110 mg, 47% yield) as a white solid. TLC (25% ethyl acetate in hexanes)  $R_f$  = 0.5;  $^1\text{H}$  NMR (600 MHz,  $\text{CDCl}_3$ )  $\delta$  8.00 (d,  $J$  = 16.1 Hz, 1H), 7.89 (d,  $J$  = 9.0 Hz, 1H), 7.85 – 7.80 (m, 1H), 7.38 (d,  $J$  = 8.9 Hz, 1H), 7.31 (m, 3H), 7.22 (dd,  $J$  = 7.8, 1.8 Hz, 1H), 6.67 (d,  $J$  = 16.1 Hz, 1H), 6.53 (s, 1H), 4.26 (q,  $J$  = 7.1 Hz, 2H), 3.99 (s, 3H), 3.84 (s, 3H), 3.66 (s, 3H), 2.00 (s, 3H), 1.33 (t,  $J$  = 7.1 Hz, 3H) ppm;  $^{13}\text{C}$  NMR (150 MHz,  $\text{CDCl}_3$ )  $\delta$  168.6, 160.4, 159.5, 154.4, 140.8, 139.3, 133.7, 129.1, 127.9, 126.3, 124.7, 123.4, 120.5, 119.7, 117.9, 115.4, 113.8, 93.1, 60.1, 56.7, 55.8, 55.4, 17.6, 14.4 ppm; HRMS (ESI) (M+H) $^+$  calculated for  $\text{C}_{25}\text{H}_{27}\text{O}_5^+$  = 407.1853, found = 407.1853 *m/z*.

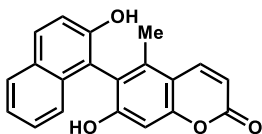

**7-hydroxy-6-(2-hydroxynaphthalen-1-yl)-5-methyl-2H-chromen-2-one (33).** This transformation was carried out with slight modifications of the original procedure<sup>13</sup> reported by Lavielle and coworkers as follows. To a solution of the intermediate **S21** (110 mg, 0.270 mmol, 1.00 equiv) in dry toluene (2.7 mL) under an inert nitrogen atmosphere was added  $\text{BBr}_3$  (0.20 mL, 2.2 mmol, 8.0 equiv) dropwise, and the resultant mixture was heated to reflux at 110 °C for 1 h. Afterwards, the reaction mixture was cooled to room temperature and subsequently to 0 °C using an ice bath and was quenched with the slow addition of water (5 mL; caution: significant exotherm noted). The quenched reaction mixture was stirred at room temperature for 30 min and was extracted with ethyl



acetate (2 x 20 mL). The combined organic layers were washed with brine, dried over anhydrous Na<sub>2</sub>SO<sub>4</sub> and concentrated under vacuum. Flash chromatography on silica gel (gradient of 5-80% ethyl acetate in hexanes) affords the desired product **33** (40 mg, 47%) as a crystalline white solid: TLC (60% ethyl acetate in hexanes) *R<sub>f</sub>* = 0.5; <sup>1</sup>H NMR (600 MHz, CDCl<sub>3</sub>) δ 7.93 (m, 2H), 7.90–7.85 (m, 1H), 7.40 (m, 2H), 7.34 (d, *J* = 8.9 Hz, 1H), 7.19 – 7.13 (m, 1H), 6.95 (s, 1H), 6.28 (d, *J* = 9.7 Hz, 1H), 5.53 (s, 1H), 5.32 (s, 1H), 2.15 (s, 3H) ppm; <sup>13</sup>C NMR (150 MHz, CDCl<sub>3</sub>) δ 161.2, 157.8, 156.6, 152.6, 140.9, 138.6, 132.85, 131.8, 129.4, 128.6, 127.9, 124.3, 123.3, 118.0, 117.1, 112.8, 112.5, 110.7, 101.9, 15.8 ppm; **HRMS (ESI)** (M+H)<sup>+</sup> calculated for C<sub>20</sub>H<sub>15</sub>O<sub>4</sub><sup>+</sup> = 319.0965, found = 319.0969 *m/z*.

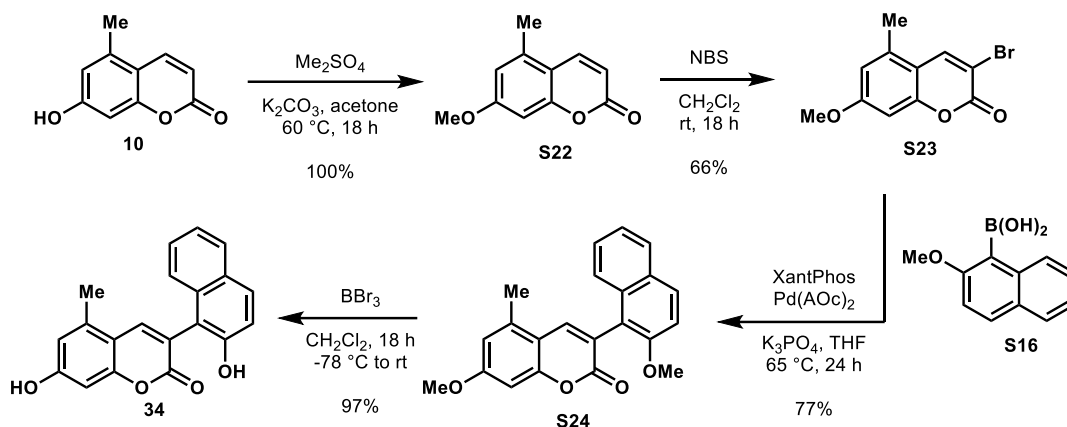

**Supplemental Scheme S4.** Synthesis of 3,1'-cross-coupled product **34**.

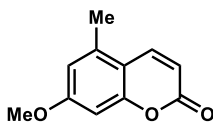

**7-methoxy-5-methyl-2H-chromen-2-one (S22).** Coumarin (**10**; 100 mg, 0.57 mmol, 1.00 equiv) and K<sub>2</sub>CO<sub>3</sub> (314 mg, 2.27 mmol, 4.00 equiv) were added to a round bottom flask. Dry acetone (2 mL, 0.5 M) was added at rt followed by Me<sub>2</sub>SO<sub>4</sub> (135 μL, 1.42 mmol, 2.50 equiv). The reaction was heated to 50 °C and allowed to stir for 16 h. The reaction was cooled to rt and quenched by stirring with 1 mL 1.0 M NaOH for 10 min at rt. The reaction was then extracted with ethyl acetate (10 mL x 3). The extracts were combined, washed with brine, dried over Na<sub>2</sub>SO<sub>4</sub>, and concentrated to a white solid (110 mg, quantitative yield). The material was carried forward without further purification. <sup>1</sup>H NMR (600 MHz, CDCl<sub>3</sub>) δ 7.82 (d, *J* = 9.7 Hz, 1H), 6.70 – 6.61 (m, 2H), 6.24 (d, *J* = 9.7 Hz, 1H), 3.84 (s, 3H), 2.47 (s, 3H); <sup>13</sup>C NMR (150 MHz, CDCl<sub>3</sub>) δ 162.5, 161.5, 156.7, 140.6, 137.4, 114.1, 112.4, 111.7, 98.8, 55.8, 18.6; **HRMS (ESI)** *m/z* calculated for C<sub>11</sub>H<sub>11</sub>O<sub>3</sub><sup>+</sup> [M+H]<sup>+</sup> 191.0703, found 191.0705.<sup>14</sup>

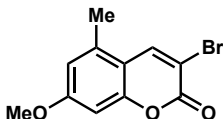

**3-bromo-7-methoxy-5-methyl-2H-chromen-2-one (S23).** Coumarin (**S22**, 92 mg, 0.48 mmol, 1.0 equiv) was added to a round bottom flask and dissolved in dry CH<sub>2</sub>Cl<sub>2</sub> (1.4 mL, 0.35 M). NBS (130 mg, 0.73 mmol, 1.5 equiv) added at room temperature under a stream of nitrogen and allowed to stir at room temperature overnight. The reaction was quenched with water and extracted with ethyl acetate (10 mL x 3). The extracts were combined, washed with brine, dried over Na<sub>2</sub>SO<sub>4</sub>, and concentrated to provide an off-white solid. The crude material was purified by flash chromatography over silica gel with a gradient of 0 to 40% ethyl acetate in hexanes. 86 mg of the desired compound was recovered as white solid in a 66% yield. <sup>1</sup>H NMR (600 MHz, CDCl<sub>3</sub>) δ 8.18 (s, 1H), 6.71 (s, 1H), 6.67 (s, 1H), 3.85 (s, 3H), 2.47 (s, 3H); <sup>13</sup>C NMR (151 MHz, CDCl<sub>3</sub>) δ 162.8, 157.7, 155.9, 142.0, 136.9, 114.7, 110.2, 107.3, 98.7, 55.9, 18.7; **HRMS (ESI)** *m/z* calculated for C<sub>11</sub>H<sub>10</sub>BrO<sub>3</sub><sup>+</sup> [M+H]<sup>+</sup> 268.9808, found 268.9811.

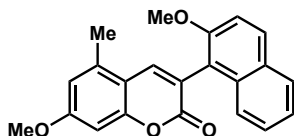

**7-methoxy-3-(2-methoxynaphthalen-1-yl)-5-methyl-2H-chromen-2-one (S24).** Coumarin **S23** (15 mg, 56  $\mu\text{mol}$ , 1.0 equiv), boronic acid (**S21**; 17 mg, 0.84 mmol, 1.5 equiv),  $\text{K}_3\text{PO}_4$  (36 mg, 0.17, 3.0 equiv),  $\text{Pd}(\text{OAc})_2$  (2.5 mg, 11  $\mu\text{mol}$ , 0.2 equiv), and XantPhos (13 mg, 22  $\mu\text{mol}$ , 0.40 equiv) were added to a dry round bottom flask. Dry THF (2.2 mL, 0.025 M) was added, and the reaction was heated to 65  $^\circ\text{C}$  for 18 h. The reaction was cooled, quenched with 1 M NaOH, and extracted with  $\text{CH}_2\text{Cl}_2$  (10 mL x 3). The combined extracts were washed with brine, dried over  $\text{Na}_2\text{SO}_4$ , and concentrated to afford a reddish-brown solid. The crude material was purified by flash chromatography over silica gel with a gradient of 5 to 30% ethyl acetate in hexanes, resulting in isolation of 14.8 mg of the target compound as a white solid in a 77% yield.  **$^1\text{H NMR}$**  (600 MHz,  $\text{CDCl}_3$ )  $\delta$  7.93 (d,  $J$  = 9.0 Hz, 1H), 7.84 (d,  $J$  = 7.5 Hz, 2H), 7.67 (d,  $J$  = 8.5 Hz, 1H), 7.42 (ddd,  $J$  = 8.4, 6.7, 1.4 Hz, 1H), 7.39 – 7.34 (m, 2H), 6.79 (d,  $J$  = 2.4 Hz, 1H), 6.73 (d,  $J$  = 2.6 Hz, 1H), 3.93 (s, 3H), 3.89 (s, 3H), 2.45 (s, 3H);  **$^{13}\text{C NMR}$**  (151 MHz,  $\text{CDCl}_3$ )  $\delta$  162.3, 160.9, 156.5, 155.1, 141.3, 137.3, 133.4, 130.6, 129.3, 128.4, 127.1, 124.1, 123.8, 120.35, 118.4, 114.0, 113.6, 112.4, 98.6, 56.9, 55.8, 18.8; **HRMS** (ESI)  $m/z$  calculated for  $\text{C}_{22}\text{H}_{19}\text{O}_4^+$   $[\text{M}+\text{H}]^+$  347.1278, found 347.1284.

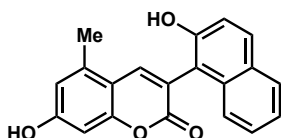

**7-hydroxy-3-(2-hydroxynaphthalen-1-yl)-5-methyl-2H-chromen-2-one (34).** Biaryl (**S24**; 28 mg, 81  $\mu\text{mol}$ , 1.0 equiv) was dissolved in dry  $\text{CH}_2\text{Cl}_2$  (1.6 mL, 0.05 M) in a dry round bottom flask and cooled to  $-78^\circ\text{C}$ .  $\text{BBr}_3$  (31  $\mu\text{L}$ , 0.32 mmol, 4.0 equiv) was added dropwise, and the reaction mixture was allowed to warm to rt and stirred for 18 h. The reaction was quenched by cooling to 0  $^\circ\text{C}$ , then adding water and stirring for 10 minutes. The pH was adjusted to approximately 4 by addition of aqueous saturated sodium bicarbonate and extracted with ethyl acetate (10 mL x 3). The extracts were combined, washed with brine, dried over  $\text{Na}_2\text{SO}_4$ , and concentrated to a brown solid. The crude material was purified flash chromatography over silica gel 7 to 60% ethyl acetate in hexanes to recover 25 mg biaryl **36** as a white solid in a 97% yield.  **$^1\text{H NMR}$**  (600 MHz, acetone- $d_6$ )  $\delta$  8.91 (s, 2H), 8.00 (s, 1H), 7.87–7.82 (m, 2H), 7.60 (dd,  $J$  = 8.5, 1.1 Hz, 1H), 7.38 (ddd,  $J$  = 8.3, 6.7, 1.3 Hz, 1H), 7.31 (ddd,  $J$  = 8.0, 6.7, 1.2 Hz, 1H), 7.27 (d,  $J$  = 8.9 Hz, 1H), 6.77 (dd,  $J$  = 2.3, 1.0 Hz, 1H), 6.70 (d,  $J$  = 2.3 Hz, 1H), 2.50 (s, 3H).  **$^{13}\text{C NMR}$**  (150 MHz, acetone- $d_6$ )  $\delta$  161.5, 160.8, 157.6, 153.8, 143.0, 139.2, 134.9, 130.7, 129.6, 128.9, 127.3, 125.0, 123.8, 120.0, 119.3, 116.7, 115.1, 112.5, 101.2, 18.6; **HRMS** (ESI)  $m/z$  calculated for  $\text{C}_{20}\text{H}_{13}\text{O}_4^-$   $[\text{M}-\text{H}]^-$  317.0819, found 317.0824.

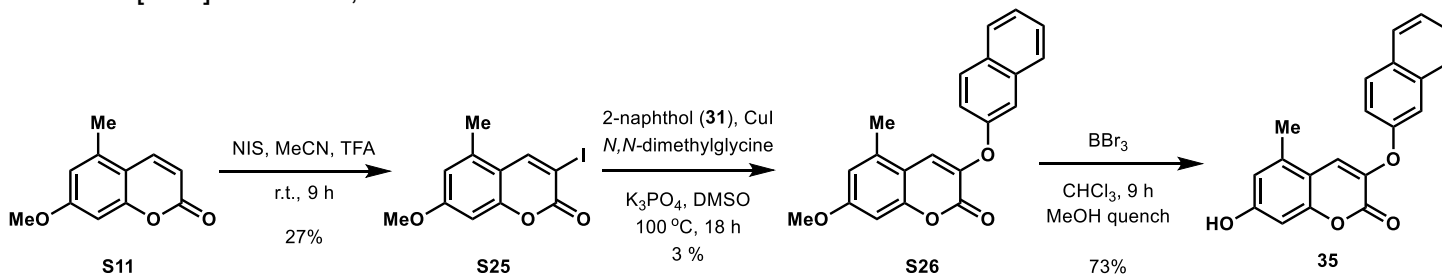

**Supplemental Scheme S5.** Synthesis of C–O cross-coupling product **35**.

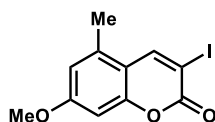

**3-iodo-5-methyl-7-methoxy coumarin (S25).** To an oven-dried round bottomed flask charged with a stir bar was added 5-methyl-7-methoxy coumarin (**S16**; 190 mg, 1.00 mmol, 1.00 equiv), followed by dry acetonitrile (20 mL). To the stirred solution was added N-iodosuccinimide (225 mg, 1.00 mmol, 1.00 equiv) in one portion, followed by trifluoroacetic acid (0.1 mL, catalytic). The resultant mixture was stirred at room

temperature for 9 h. Afterwards, the reaction mixture was concentrated under reduced pressure and the crude mixture was purified by flash chromatography over silica gel (gradient of 5-50% ethyl acetate in hexanes) to afford intermediate **S12** (86 mg, 0.27 mmol, 27% yield) as a white solid: TLC (25% ethyl acetate in hexanes)  $R_f = 0.5$ ;  $^1\text{H NMR}$  (600 MHz,  $\text{CDCl}_3$ )  $\delta$  8.44 (s, 1H), 6.72–6.65 (m, 2H), 3.87 (s, 2H), 2.48 (s, 3H);  $^{13}\text{C NMR}$  (150 MHz,  $\text{CDCl}_3$ )  $\delta$  162.9, 157.9, 156.6, 149.4, 136.5, 114.3, 113.4, 98.5, 80.6, 55.8, 18.5; **HRMS** (ESI)  $m/z$  calculated for  $\text{C}_{11}\text{H}_{10}\text{O}_3^+$   $[M+H]^+ = 316.9669$ , found = 316.9689  $m/z$ .

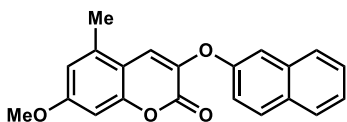

**7-methoxy-5-methyl-3-(naphthalen-2-yloxy)-2H-chromen-2-one (S26).** The aryl iodide phenol coupling was carried out according to conditions previously reported by Maiti and Buchwald<sup>15</sup> as follows. To an oven-dried round bottomed flask charged with a stir bar was added iodide **S25** (86 mg, 0.27 mmol, 1.00 equiv), 2-naphthol (**31**, 47 mg, 0.32 mmol, 1.2 equiv), copper iodide (10 mg, 20 mol %), *N,N*-dimethylglycine (11 mg, 40 mol %), dry  $\text{K}_3\text{PO}_4$  (172 mg, 0.810 mmol, 3.00 equiv) and dry DMSO (1 mL). The resultant mixture was subjected to vacuum and back filled with nitrogen for a total of 3 times. The reaction mixture was heated to 100 °C for 18 h. Afterwards, the reaction mixture was cooled to room temperature, a saturated solution of  $\text{NH}_4\text{Cl}$  (20 mL) was added to the reaction mixture, and the resultant mixture was extracted with ethyl acetate (20 mL x 3). The combined organic extracts were washed with brine (20 mL), dried over  $\text{Na}_2\text{SO}_4$  and concentrated in vacuum. Flash chromatography over silica gel (gradient of 5-40% ethyl acetate in hexanes) afforded the C–O cross-coupling product **S26** (3.0 mg, 3.3% yield) as a white solid: TLC (20% ethyl acetate in hexanes)  $R_f = 0.5$ ;  $^1\text{H NMR}$  (600 MHz,  $\text{CDCl}_3$ )  $\delta$  7.89 (d,  $J = 8.9$  Hz, 1H), 7.86 (dd,  $J = 8.3, 1.3$  Hz, 1H), 7.77 – 7.74 (m, 1H), 7.50 (ddd,  $J = 8.2, 6.8, 1.4$  Hz, 1H), 7.45 (ddd,  $J = 8.1, 6.8, 1.3$  Hz, 1H), 7.43 (s, 1H), 7.40 (d,  $J = 2.5$  Hz, 1H), 7.35 (dd,  $J = 8.9, 2.5$  Hz, 1H), 6.79 – 6.73 (m, 2H), 3.88 (s, 3H), 2.38 (s, 3H);  $^{13}\text{C NMR}$  (150 MHz,  $\text{CDCl}_3$ )  $\delta$  161.2, 157.8, 153.9, 153.5, 138.9, 136.6, 134.2, 130.6, 130.3, 127.8, 127.3, 126.8, 125.1, 123.2, 118.9, 114.4, 113.3, 111.3, 98.6, 55.7, 18.7; **HRMS** (ESI)  $(M+H)^+$  calculated for  $\text{C}_{21}\text{H}_{17}\text{O}_4^+$  = 333.1121, found = 333.1122  $m/z$ .

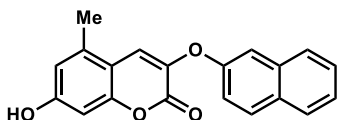

**7-hydroxy-5-methyl-3-(naphthalen-2-yloxy)-2H-chromen-2-one (35).** To a solution of intermediate **S26** (3 mg, 9  $\mu\text{mol}$ , 1 equiv) in dry  $\text{CH}_2\text{Cl}_2$  (1 mL) at -78 °C was added  $\text{BBr}_3$  (1 M solution in  $\text{CH}_2\text{Cl}_2$ ; 0.45 mL, 50.0 equiv). The resultant mixture was stirred at room temperature overnight. Afterwards, the reaction mixture was carefully quenched with dry methanol, and the resultant mixture was concentrated under vacuum. The crude mixture was dissolved in dry methanol (1 mL) and the mixture was concentrated to dryness under vacuum. This process was repeated a total of 5 times to azeotropically remove  $\text{B(OMe)}_3$ . Afterwards, the crude mixture was dried overnight under vacuum to afford the deprotected C–O cross-coupling product **35** (2.1 mg, 73% yield) as a white solid: TLC (30% ethyl acetate in hexanes)  $R_f = 0.5$ ;  $^1\text{H NMR}$  (800 MHz,  $\text{DMSO}-d_6$ )  $\delta$  10.45 (s, 1H), 8.19 (d,  $J = 8.5$  Hz, 1H), 8.00 (d,  $J = 7.9$  Hz, 1H), 7.96 (d,  $J = 9.0$  Hz, 1H), 7.92 (s, 1H), 7.72 (ddd,  $J = 8.3, 6.8, 1.3$  Hz, 1H), 7.56 (ddd,  $J = 8.0, 6.7, 1.1$  Hz, 1H), 7.42 (d,  $J = 9.0$  Hz, 1H), 6.71 (d,  $J = 2.3$  Hz, 1H), 6.66 (d,  $J = 2.4$  Hz, 1H), 2.39 (s, 3H);  $^{13}\text{C NMR}$  (200 MHz,  $\text{DMSO}-d_6$ )  $\delta$  160.4, 157.3, 154.2, 151.8, 138.3, 136.1, 132.7, 131.1, 129.86, 129.0, 128.9, 127.6, 126.1, 126.0, 117.6, 115.2, 110.3, 109.0, 100.6, 18.7; **HRMS** (ESI) calculated for  $\text{C}_{20}\text{H}_{13}\text{O}_4^+$  = 713.0819, found = 317.0822  $m/z$ .

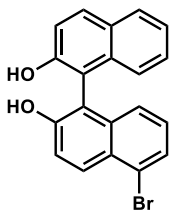

**5-bromo-[1,1'-binaphthalene]-2,2'-diol (43).** To a solution of 5-bromo-2-naphthol (100 mg, 0.45 mmol) and 2-naphthol (**31**, 194 mg, 1.35 mmol) in 45 mL of CH<sub>2</sub>Cl<sub>2</sub> was added Cu-TMEDA catalyst (10.4 mg, 5.00 mol %). The resultant mixture was stirred at room temperature in open air for 72 h. Afterwards, the reaction mixture was analyzed by TLC and LC-MS. The mixture was concentrated and purified by flash chromatography over silica gel (gradient of 5-50% ethyl acetate in hexanes) to afford partially pure compound **43** (85 mg, 52% yield). The partially pure compound was resubjected to purification by flash chromatography over silica gel (gradient of 5-50% ethyl acetate in hexanes) to afford pure **43** (45 mg, 28% yield). TLC (25% ethyl acetate in hexanes)  $R_f = 0.5$ ;  $^1\text{H NMR}$  (600 MHz, DMSO-*d*<sub>6</sub>)  $\delta$  9.42 (s, 1H), 9.29 (s, 1H), 8.12 (d, *J* = 2.2 Hz, 1H), 7.86 (td, *J* = 8.3, 7.9, 1.1 Hz, 3H), 7.37 (d, *J* = 8.9 Hz, 1H), 7.34 – 7.29 (m, 2H), 7.25 (ddd, *J* = 8.1, 6.7, 1.3 Hz, 1H), 7.19 (ddd, *J* = 8.2, 6.7, 1.4 Hz, 1H), 6.93 – 6.90 (m, 1H), 6.88 (dt, *J* = 9.0, 0.6 Hz, 1H);  $^{13}\text{C NMR}$  (150 MHz, DMSO-*d*<sub>6</sub>)  $\delta$  154.0, 153.5, 134.4, 133.2, 130.0, 129.8, 129.4, 129.2, 128.6, 128.4, 128.4, 127.2, 126.5, 124.7, 122.8, 120.20, 119.0, 116.2, 115.6, 115.2; **HRMS** (ESI) calculated for C<sub>20</sub>H<sub>12</sub>BrO<sub>2</sub><sup>-</sup> = 363.0026, found = 363.0065 *m/z*.

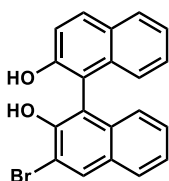

**3-bromo-[1,1'-binaphthalene]-2,2'-diol (44).** To a solution of 3-bromo-2-naphthol (**39**, 116 mg, 0.520 mmol, 1.00 equiv) and 2-naphthol (**31**, 75 mg, 0.52 mmol, 1.0 equiv) in HFIP (5.2 mL, 0.10 M) was added Cu(OH)Cl·TMEDA (121 mg, 0.520 mmol, 1.00 equiv) at room temperature and stirred for 48 h. The reaction was quenched with 1 mL 0.1 M HCl and diluted with deionized H<sub>2</sub>O (10 mL), extracted with ethyl acetate (25 mL x 3). The combined organic extracts were washed with brine, dried over Na<sub>2</sub>SO<sub>4</sub>, then concentrated under reduced pressure to afford 236 mg of a brown solid. The crude mixture was purified by flash chromatography over silica gel with a gradient of 5% to 30% ethyl acetate in hexanes, recovering 44 mg of cross-coupled product **44** as an off-white solid in a 23% yield with minor impurities.  $^1\text{H NMR}$  (400 MHz, CDCl<sub>3</sub>)  $\delta$  8.28 (s, 1H), 7.97 (d, *J* = 8.9 Hz, 1H), 7.89 (d, *J* = 8.1 Hz, 1H), 7.82 (d, *J* = 8.2 Hz, 1H), 7.43–7.34 (m, 3H), 7.34–7.28 (m, 2H), 7.14 (d, *J* = 8.4 Hz, 1H), 7.10 (d, *J* = 8.3 Hz, 1H), 5.61 (s, 1H), 5.02 (s, 1H).  $^1\text{H}$  and  $^{13}\text{C}$  NMR spectra obtained were consistent with literature values.<sup>16,17</sup> **HRMS** (ESI) *m/z* calculated for C<sub>20</sub>H<sub>12</sub>BrO<sub>2</sub><sup>-</sup> [M-H]<sup>-</sup> 363.0026, found 363.0022 *m/z*.

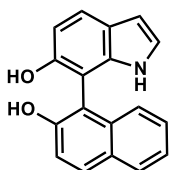

**7-(2-hydroxynaphthalen-1-yl)-1H-indol-6-ol (45).** To a solution of 6-hydroxyindole (133 mg, 1.00 mmol, 1 equiv) and 2-naphthol (**31**, 144 mg, 1.00 mmol, 1.00 equiv) in 50 mL of CH<sub>2</sub>Cl<sub>2</sub> was added Cu-TMEDA catalyst (23 mg, 5.0 mol %). The resultant mixture was stirred at room temperature in open air for 72 h. Afterwards, the reaction mixture was analyzed by TLC and LCMS. The reaction mixture was concentrated and purified by flash chromatography over silica gel (gradient of 10-60% ethyl acetate in hexanes) to afford partially pure **39** (12 mg, 4.4% yield). The compound **45** was redissolved in methanol, filtered through a 0.22  $\mu\text{m}$  filter and purified by preparative HPLC using a Phenomenex Kinetex 5  $\mu\text{m}$  C18, 150 x 21.2 mm column using the following conditions. Mobile phase A = deionized water + 0.1% formic acid. Mobile Phase B = acetonitrile + 0.1% formic acid. Method: 5% to 100% B over 15 minutes, 100% B over 1 minute; Flow rate = 10 mL/min. The desired product eluted at 12 min. Preparative HPLC purification afforded clean compound **45** as a light brown solid (2.3 mg, 0.83% yield overall). TLC (30% ethyl acetate in hexanes)  $R_f = 0.5$ ;  $^1\text{H NMR}$  (600 MHz, DMSO-*d*<sub>6</sub>)  $\delta$  9.83 (s, 1H), 9.19 (s, 1H),

8.42 (s, 1H), 7.82 (dd,  $J = 8.0, 5.2$  Hz, 2H), 7.37 (d,  $J = 8.4$  Hz, 1H), 7.30 (d,  $J = 8.8$  Hz, 1H), 7.26 – 7.19 (m, 2H), 7.12 (dd,  $J = 7.9, 1.8$  Hz, 1H), 6.90 (t,  $J = 2.8$  Hz, 1H), 6.75 (d,  $J = 8.4$  Hz, 1H), 6.32 (t,  $J = 2.5$  Hz, 1H).  $^{13}\text{C}$  NMR (150 MHz, DMSO- $d_6$ )  $\delta$  153.6, 150.8, 137.1, 134.4, 128.9, 128.7, 128.2, 126.0, 125.3, 123.8, 122.6, 121.5, 119.8, 119.2, 114.8, 110.2, 105.6, 101.3. HRMS (ESI) calculated for  $\text{C}_{18}\text{H}_{12}\text{NO}_2^- = 274.0874$ , found = 274.0865  $m/z$ .

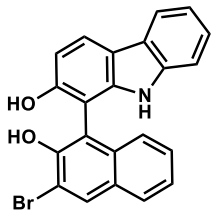

**1-(3-bromo-2-hydroxynaphthalen-1-yl)-9H-carbazol-2-ol (46).** To a solution of 2-hydroxycarbazole (366 mg, 2.00 mmol) and 3-bromo-2-naphthol (**39**, 446 mg, 2.00 mmol) in 100 mL of  $\text{CH}_2\text{Cl}_2$  was added Cu-TMEDA catalyst (46 mg, 5.0 mol %). The resultant mixture was stirred at room temperature in open air for 72 h. Afterwards, the reaction mixture was analyzed TLC and LCMS. The mixture was concentrated and purified by flash chromatography over silica gel (gradient of 5-40% ethyl acetate in hexanes) to afford partially pure **46** (20 mg, 2.5% yield). The partially pure compound was resubjected to purification by flash chromatography over silica gel (gradient of 5-25% ethyl acetate in hexanes) to afford pure **46** (8 mg, 1%). TLC (20% ethyl acetate in hexanes)  $R_f = 0.5$ ;  $^1\text{H}$  NMR (600 MHz, DMSO- $d_6$ )  $\delta$  10.21 (s, 1H), 9.22 (s, 1H), 8.86 (s, 1H), 8.32 (s, 1H), 7.99 (d,  $J = 8.2$  Hz, 2H), 7.89 (dd,  $J = 8.3, 1.3$  Hz, 1H), 7.32 (ddd,  $J = 8.1, 6.7, 1.3$  Hz, 1H), 7.28 – 7.25 (m, 1H), 7.25 – 7.23 (m, 1H), 7.18 (ddd,  $J = 8.1, 7.0, 1.2$  Hz, 1H), 7.10 – 7.04 (m, 2H), 6.90 (d,  $J = 8.4$  Hz, 1H);  $^{13}\text{C}$  NMR (150 MHz,  $\text{CDCl}_3$ )  $\delta$  152.7, 148.8, 139.6, 139.4, 133.5, 132.2, 130.0, 128.0, 127.6, 125.2, 124.9, 124.6, 123.7, 122.4, 119.9, 119.6, 117.6, 112.3, 111.9, 110.6, 109.2, 101.6; HRMS (ESI) calculated for  $\text{C}_{22}\text{H}_{13}\text{BrNO}_2^- = 402.0135$ , found = 402.0129  $m/z$ .

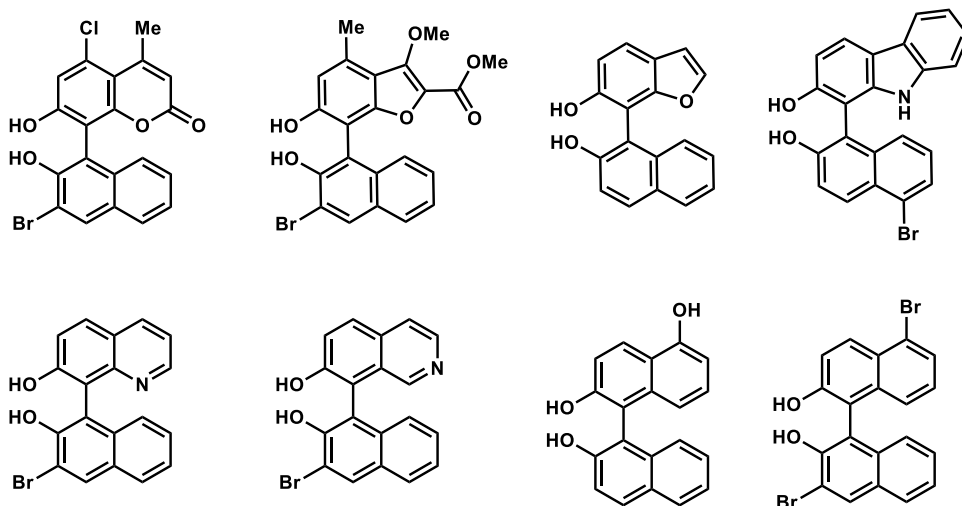

**Supplemental Figure S1.** We were not successful in the synthesis of the following compounds through small molecules-based oxidative cross-coupling strategies. In most of the following examples, trace amounts of the cross-coupling products were formed, thus, product isolation was not fruitful.

## Analytical scale generation of cross-coupled product standards

To determine the site-selectivity of selected KtnC-catalyzed cross-coupling reactions, standards were prepared by transesterification of dimers with known connectivity. Subjecting dimers containing a labile vinylogous methyl ester to a given alcohol in the presence of acid and heat created a statistical mixture of compounds that could be used on analytical scale with analysis by LC-MS without the need for isolation of individual species. This strategy allowed rapid access to standards with known connectivity for comparison to KtnC cross-coupled reactions, which is particularly attractive for generation of 6,6'-cross-coupled coumarin scaffolds which were synthetically intractable.

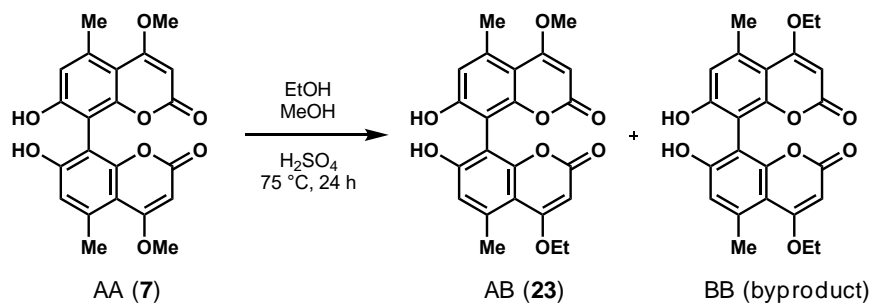

**4-ethoxy-7,7'-dihydroxy-4'-methoxy-5,5'-dimethyl-2H,2H'-[8,8'-bichromene]2,2'-dione (23).** To an authentic standard of 7,7'-dihydroxy-4,4'-dimethoxy-5,5'-dimethyl-2H,2H'-[8,8'-bichromene]-2,2'-dione **7** (2.5 mg, 5.9  $\mu$ mol, 1.0 equiv) was added methanol (200  $\mu$ L, 29.4  $\mu$ M), ethanol (200  $\mu$ L, 29.4  $\mu$ M), and concentrated H<sub>2</sub>SO<sub>4</sub> (11  $\mu$ L, 0.54 mM) in a 1-dram vial with stir bar. The vial was sealed and heated to 75 °C and monitored by LC-MS over 24 h. The crude mixture was used as an analytical standard. **HRMS** (ESI) calculated for C<sub>23</sub>H<sub>21</sub>O<sub>8</sub><sup>+</sup> [M+H]<sup>+</sup> = 425.1231, found = 425.1251 *m/z*.

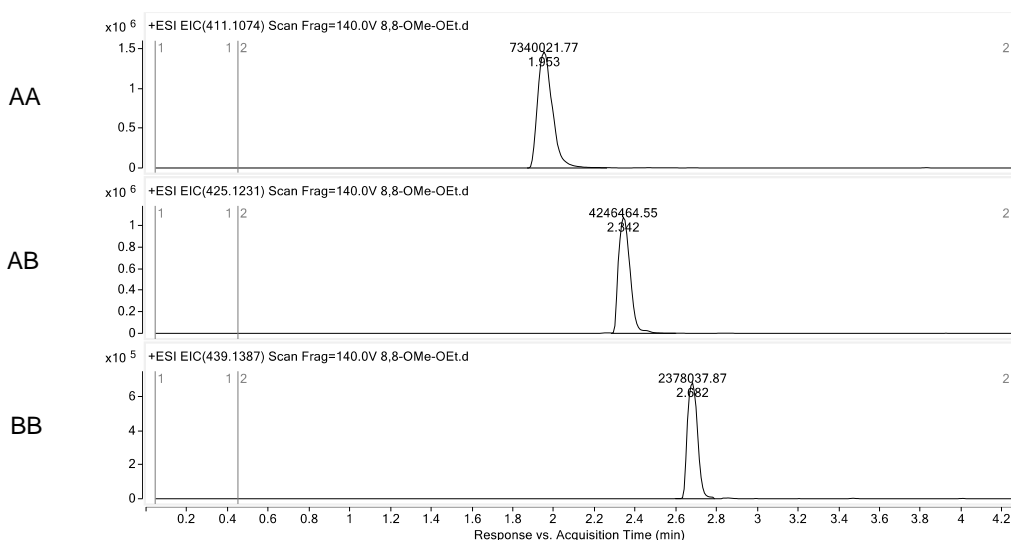

**Supplemental Figure S2.** Extracted ion chromatograms (EICs) of products with 8,8'-connectivity.

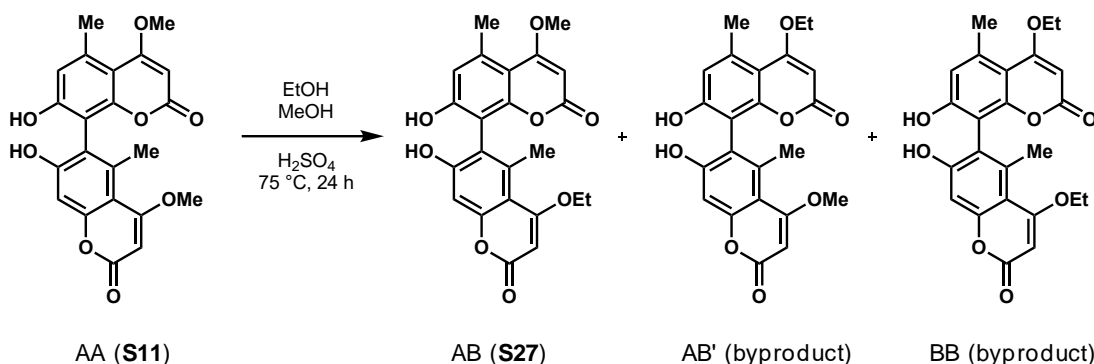

**4-ethoxy-7,7'-dihydroxy-4'-methoxy-5,5'-dimethyl-2H,2'H-[6,8'-bichromene]-2,2'-dione (S27).** To an authentic standard of 7,7'-dihydroxy-4,4'-dimethoxy-5,5'-dimethyl-2H,2'H-[6,8'-bichromene]-2,2'-dione **S11** (0.95 mg, 0.22  $\mu\text{mol}$ , 1.00 equiv) was added methanol (100  $\mu\text{L}$ , 2.20  $\mu\text{M}$ ), ethanol (100  $\mu\text{L}$ , 2.20  $\mu\text{M}$ ), and concentrated  $\text{H}_2\text{SO}_4$  (6.0  $\mu\text{L}$ , 0.037 mM) in a 1-dram vial with stir bar. The vial was sealed and heated to 75  $^\circ\text{C}$  and monitored by LC-MS over 24 h. The crude mixture was used as an analytical standard. **HRMS** (ESI) calculated for  $\text{C}_{23}\text{H}_{21}\text{O}_8^+$   $[\text{M}+\text{H}]^+ = 425.1231$ , found = 425.1227  $m/z$ .

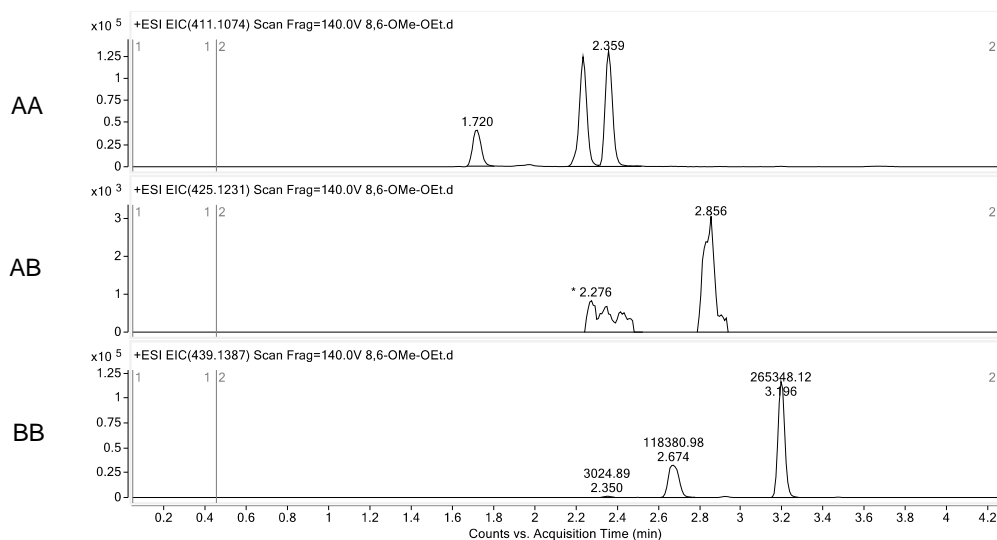

**Supplemental Figure S3.** Extracted ion chromatograms (EICs) of products with 8,6'- and 6,8'-connectivity.

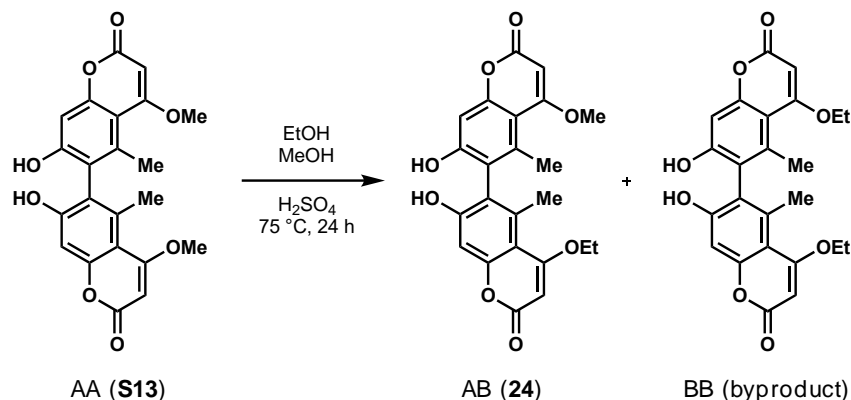

**4-ethoxy-7,7'-dihydroxy-4'-methoxy-5,5'-dimethyl-2*H*,2*H*-[6,6'-bichromene]2,2'-dione (**24**).** To an authentic standard of 7,7'-dihydroxy-4,4'-dimethoxy-5,5'-dimethyl-2*H*,2'*H*-[6,6'-bichromene]-2,2'-dione **S13** (0.95 mg, 0.22  $\mu\text{mol}$ , 1.0 equiv) was added methanol (100  $\mu\text{L}$ , 2.2  $\mu\text{M}$ ), ethanol (100  $\mu\text{L}$ , 2.2  $\mu\text{M}$ ), and concentrated  $\text{H}_2\text{SO}_4$  (6.0  $\mu\text{L}$ , 37  $\mu\text{M}$ ) in a 1 dram vial with stir bar. The vial was sealed and heated to 75  $^\circ\text{C}$  and monitored by LC-MS over 24 h. The crude mixture was used as an analytical standard. **HRMS** (ESI) calculated for  $\text{C}_{23}\text{H}_{21}\text{O}_8^+$   $[\text{M}+\text{H}]^+ = 425.1231$ , found = 425.1251  $m/z$ .

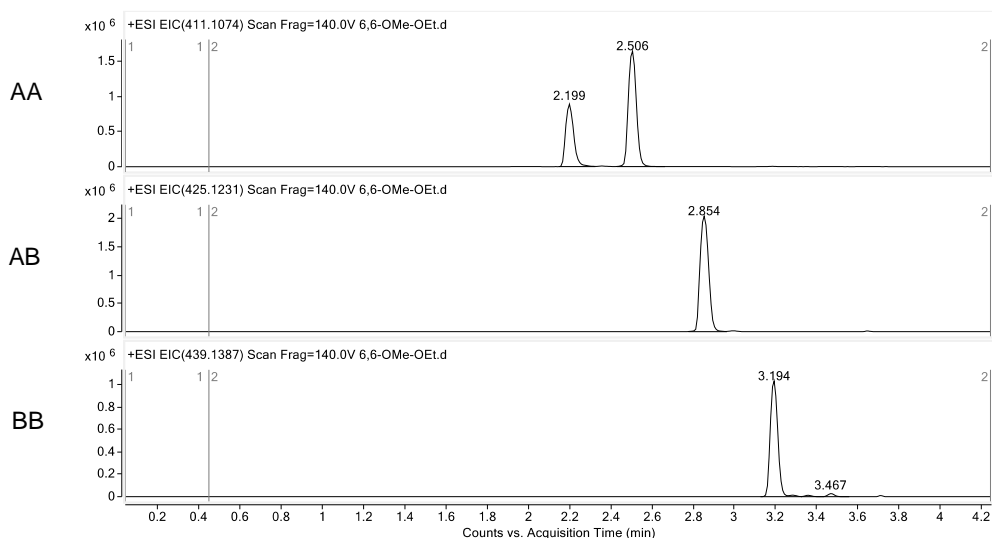

**Supplemental Figure S4.** Extracted ion chromatograms (EICs) of cross-coupled products with 6,6'-connectivity.



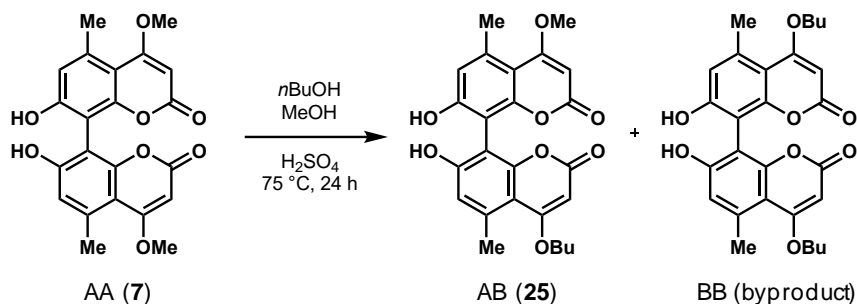

**4-butoxy-7,7'-dihydroxy-4'-methoxy-5,5'-dimethyl-2H,2'H-[8,8'-bichromene]2,2'-dione (25).** To an authentic standard of 7,7'-dihydroxy-4,4'-dimethoxy-5,5'-dimethyl-2H,2'H-[8,8'-bichromene]-2,2'-dione **7** (2.5 mg, 5.5  $\mu\text{mol}$ ,

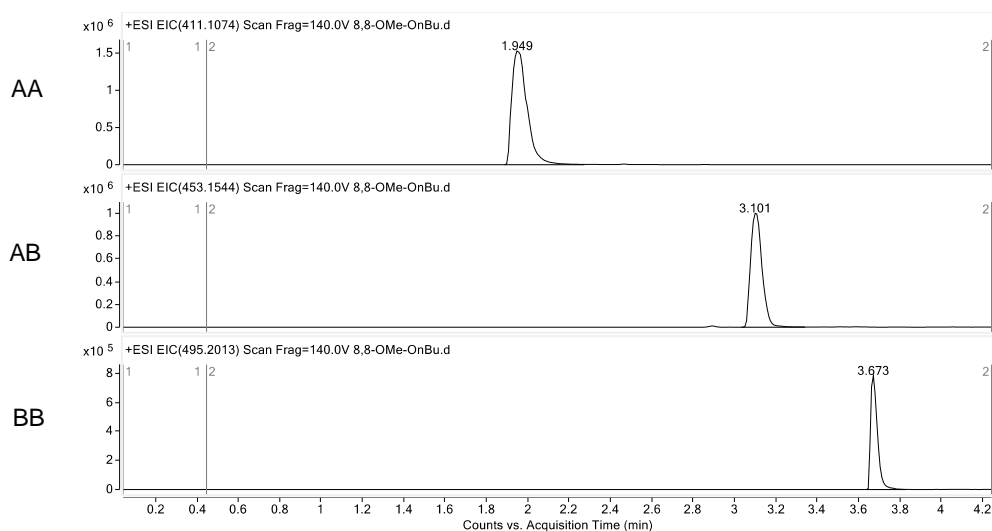

1.0 equiv) was added *n*-butanol (200  $\mu\text{L}$ , 28.0  $\mu\text{M}$ ), *n*-butanol (200  $\mu\text{L}$ , 28.0  $\mu\text{M}$ ), and concentrated  $\text{H}_2\text{SO}_4$  (11  $\mu\text{L}$ , 0.5 mM) in a 1 dram vial with stir bar. The vial was sealed and heated to 75  $^\circ\text{C}$  and monitored by LC-MS over 24 h. The crude mixture was used as an analytical standard. **HRMS** (ESI) calculated for  $\text{C}_{25}\text{H}_{25}\text{O}_8^+$   $[\text{M}+\text{H}]^+$  = 453.1544, found = 453.1570  $m/z$ .

**Supplemental Figure S5.** Extracted ion chromatograms (EICs) of cross-coupled products with 8,8'-connectivity.

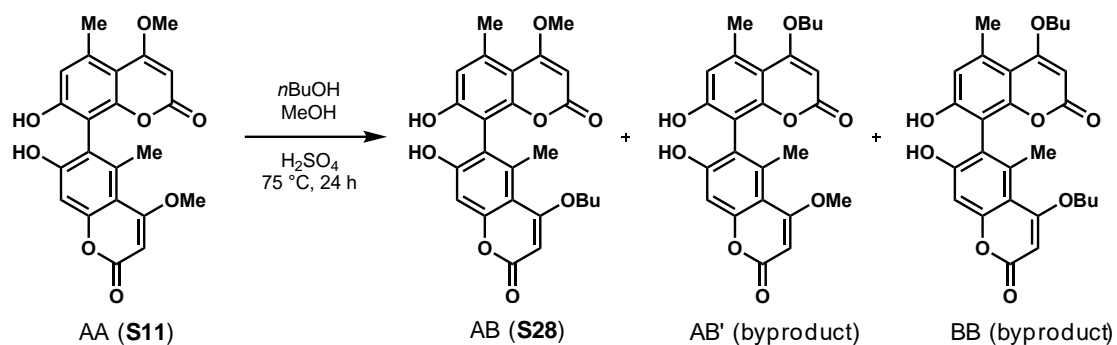

**4-butoxy-7,7'-dihydroxy-4'-methoxy-5,5'-dimethyl-2*H*,2*H*'-[6,8'-bichromene]2,2'-dione (S28).** To an authentic standard of 7,7'-dihydroxy-4,4'-dimethoxy-5,5'-dimethyl-2*H*,2'*H*'-[6,8'-bichromene]-2,2'-dione **S11** (0.95 mg, 2.1  $\mu\text{mol}$ , 1.0 equiv) was added methanol (100  $\mu\text{L}$ , 21.0  $\mu\text{M}$ ), *n*-butanol (100  $\mu\text{L}$ , 21.0  $\mu\text{M}$ ), and concentrated  $\text{H}_2\text{SO}_4$  (6.0  $\mu\text{L}$ , 0.35 mM) in a 1 dram vial with a stir bar. The vial was sealed and heated to 75  $^\circ\text{C}$  and monitored by LC-MS over 24 h. The crude mixture was used as an analytical standard. **HRMS** (ESI) calculated for  $\text{C}_{25}\text{H}_{25}\text{O}_8^+$   $[\text{M}+\text{H}]^+ = 453.1544$ , found = 453.3457  $m/z$ .

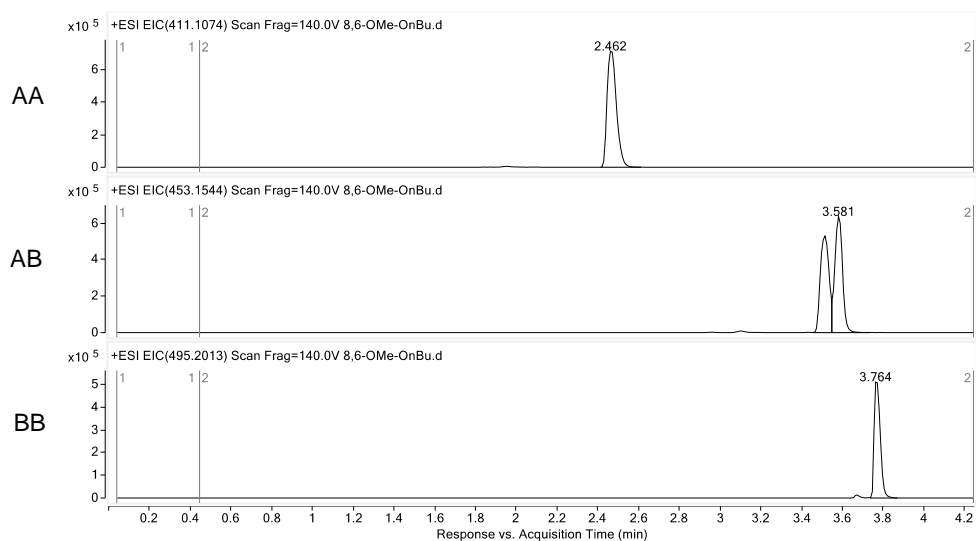

**Supplemental Figure S6.** Extracted ion chromatograms (EICs) of products with 8,6'- and 6,8'-connectivity.

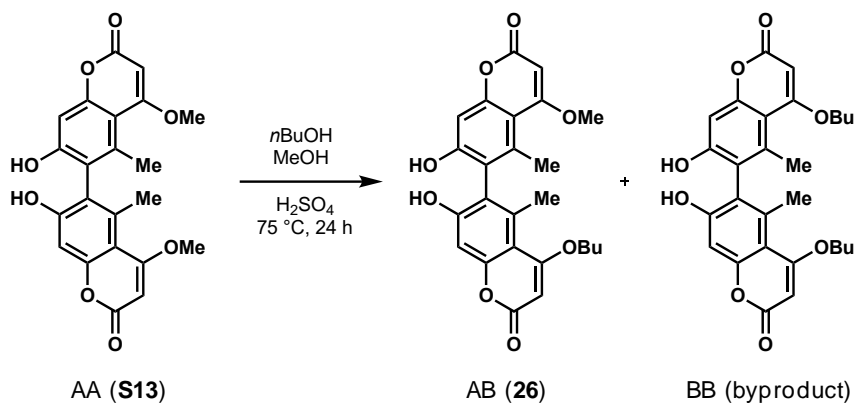

**4-butoxy-7,7'-dihydroxy-4'methoxy-5,5'-dimethyl-2H,2'H-[6,6'-bichromene]-2,2'-dione (26).** To an authentic standard of 7,7'-dihydroxy-4,4'-dimethoxy-5,5'-dimethyl-2H,2'H-[6,6'-bichromene]-2,2'-dione (**S13**; 0.95 mg, 2.1  $\mu\text{mol}$ , 1.0 equiv) was added methanol (100  $\mu\text{L}$ , 21  $\mu\text{M}$ ), *n*-butanol (100  $\mu\text{L}$ , 21.0  $\mu\text{M}$ ), and concentrated  $\text{H}_2\text{SO}_4$  (6.0  $\mu\text{L}$ , 0.35 mM) in a 1 dram vial with stir bar. The vial was sealed and heated to 75  $^\circ\text{C}$  and monitored by LC-MS over 24 h. The crude mixture was used as an analytical standard. **HRMS** (ESI) calculated for  $\text{C}_{25}\text{H}_{25}\text{O}_8^+$   $[\text{M}+\text{H}]^+ = 453.1544$ , found = 453.1567  $m/z$ .

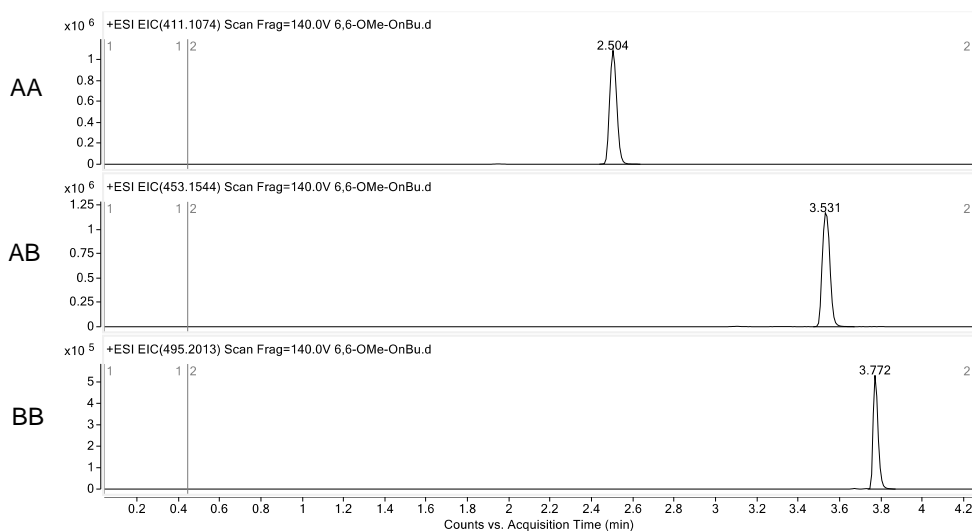

**Supplemental Figure S7.** Extracted ion chromatograms (EICs) of cross-coupled products with 6,6'-connectivity.

## Chemical methods for oxidative cross-coupling

**Supplemental Table S1.** Oxidative cross-coupling reactions of different classes of phenols were benchmarked with transition metal catalysts.<sup>18-25</sup> Representative examples of coumarin–coumarin, coumarin–naphthol, and naphthol–naphthol cross-coupling reactions are included. Percent yields for isolated cross-coupled products are reported. <sup>a</sup>Relative percent conversion calculated by LC-MS. <sup>b</sup>Percent yield calculated by NMR. All reactions were screened on analytical scale and monitored by LC-MS to optimize conditions and determine general reactivity. LC-MS traces (Supplemental Figures S11-25) detail the extracted ion chromatograms of the remaining starting materials, dimerized, and cross-coupled products formed in the reaction. Reactions that showed relative conversions of >5% to cross-coupled products were selected for further investigation.

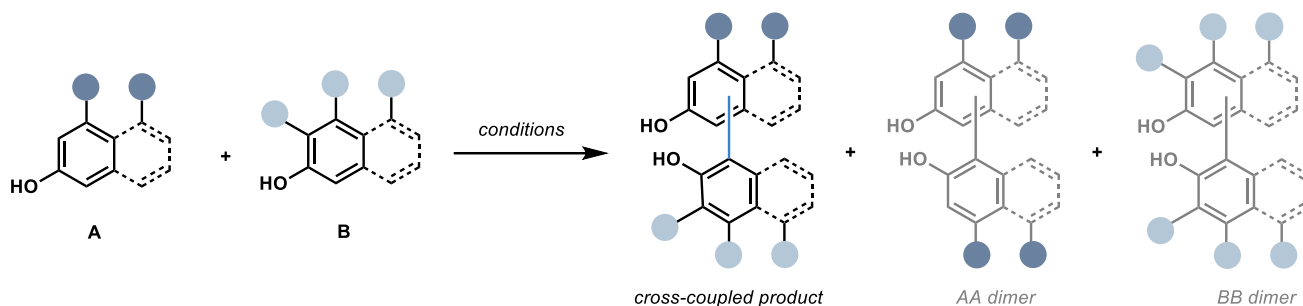

| Entry | Phenols | (a) Cu(OH)Cl·TMEDA | (b) VOF <sub>3</sub> | (c) FeCl <sub>3</sub> | (d) Fe(TPP)Cl | (e) Cr-Salen-Cy |
|-------|---------|--------------------|----------------------|-----------------------|---------------|-----------------|
| 1     |         | 5% <sup>a</sup>    | 23% <sup>a</sup>     | trace                 | trace         | 0%              |
| 2     |         | 19% <sup>b</sup>   | trace                | 0%                    | decomposition | trace           |
| 3     |         | 23%                | 5% <sup>b</sup>      | 6% <sup>b</sup>       | decomposition | 5%              |

**General discussion on oxidative cross-coupling reactions.** Achieving reactivity, chemoselectivity and site-selectivity were challenging across the scope of representative reactions studied. In general, we observed low overall reactivity, with isolated yields of cross-coupled products from 5% (Entry 3e) to 23% in the best scenario (Entry 3a). In many cases, the reactions resulted in mixtures of multiple species including unreacted starting materials, dimers, and cross-coupled products, and in some cases, multiple regioisomers of each species. Analysis of these complex mixtures has been an ongoing challenge; however, we have found success using LC-MS as a screening tool to quickly identify reactions that show desirable chemoselectivity and determine the site-selectivity when authentic standards are accessible. Using relative percent conversions has been useful in providing an estimate of the reactivity observed for a given set of substrates under established conditions and serve as an indication for the reactions that should be scaled up for further analysis. Verification of the formation of meaningful amounts of cross-coupled products is attained by either purification and isolation of products, or by <sup>1</sup>H NMR analysis of mixtures and comparison to internal standards. When these two options were not feasible due to low yields of the desired cross-coupled products or the formation of inseparable mixtures of products, percent conversion to cross-coupled products calculated by LC-MS remained the best indication of reactivity.

Of the phenols selected for direct oxidative coupling, coumarin–coumarin cross-coupling reactions (Entries 1a-1e) were the most challenging to achieve, whereas naphthol–naphthol cross-coupling reactions (3a-3e) were more broadly accessible across the panel of oxidants investigated. When reactivity was achieved, the formation of multiple products rendered isolation a challenge, with several rounds of purification required to

isolate characterizable products. The most versatile catalyst for cross-coupling was Cu(OH)Cl•TMEDA (column A), which formed cross-coupled products with each substrate pair with low to moderate reactivity. Whereas this copper-mediated method generally led to the formation of only one major cross-coupled product, the reactions suffered from competing dimerization and overall low yields. In general, iron and chromium catalysts resulted in mixtures of products, with no reactivity in coumarin–coumarin and coumarin–naphthol coupling reactions. In reactions with Fe(TPP)Cl (column C), decomposition of starting materials in each case was observed. For coumarin–coumarin coupling, VOF<sub>3</sub> (Entry 1b) achieved modest conversions to cross-coupled products and was the only oxidant capable of forming 8,6'-isomers and trace amounts of 6,6'-isomers. However, individual isomers were not isolable from the complex reaction mixtures as isomers were inseparable.

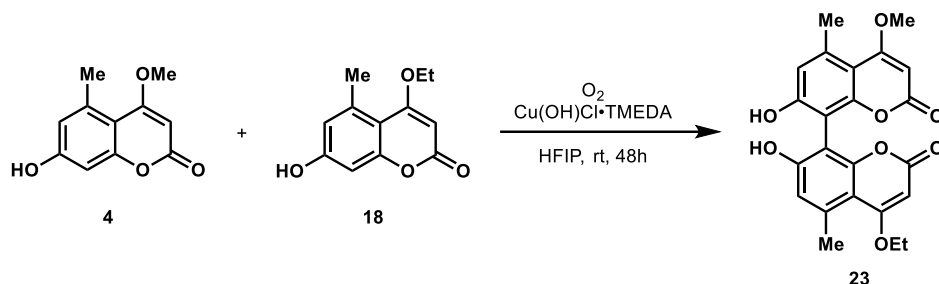

**Entry 1a.** To a solution of 7-hydroxy-4-methoxy-5-methyl-2H-chromen-2-one (**4**; 100 mg, 0.481 mmol, 1.00 equiv) and 4-ethoxy-7-hydroxy-5-methyl-2H-chromen-2-one (**18**; 107 mg, 0.481 mmol, 1.00 equiv) in hexafluoro-2-propanol (4.81 mL, 0.1 M) was added Di- $\mu$ -hydroxo-bis[(*N,N,N',N'*-tetramethylethylenediamine)copper(II)] chloride, CAS# 30698-64-7, (Cu(OH)Cl•TMEDA, 113 mg, 0.481 mmol, 1.00 equiv) at room temperature and stirred for 48 h.<sup>16</sup> Upon addition of copper complex, reaction mixture turned a deep navy blue. The reaction was quenched with 2 mL 0.1 M HCl, which induced a color change from navy to green to light yellow. The reaction was diluted with deionized H<sub>2</sub>O (30 mL), extracted with ethyl acetate (25 mL x 3) and 70% isopropanol was added to aid in emulsion separation (2 mL x 2). The combined organic extracts were washed with brine, dried over Na<sub>2</sub>SO<sub>4</sub>, then concentrated to a pale-yellow solid, 139 mg of crude material recovered as a mixture of unreacted starting materials, dimers, and one cross-coupled product. The mixture was analyzed by LC-MS to determine the connectivity of the cross-coupled product **23** using authentic standards generated by transesterification (see page S12 for synthesis). **HRMS** (ESI) calculated for C<sub>23</sub>H<sub>19</sub>O<sub>8</sub><sup>-</sup> [M-H]<sup>-</sup> = 423.1085, found 423.1082 *m/z*.

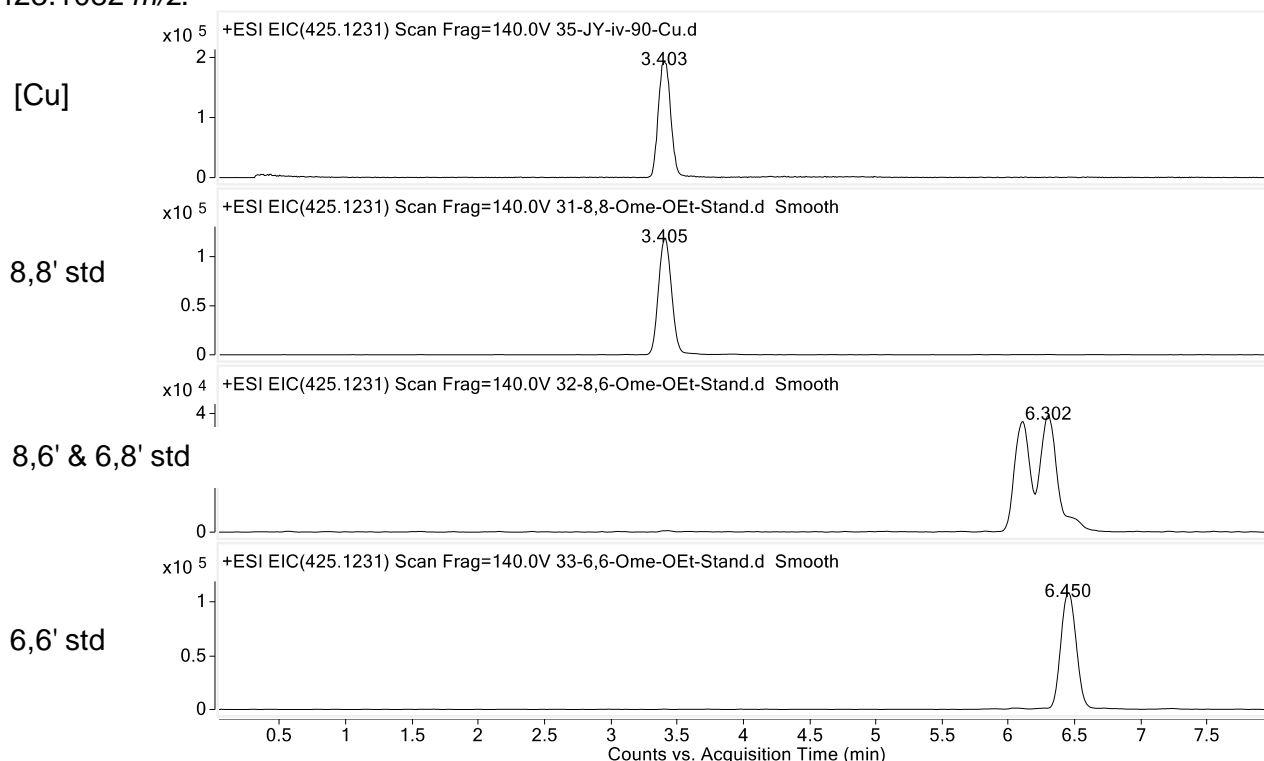

**Supplemental Figure S8.** Extracted ion chromatograms (EICs) of cross-coupled products (1A) compared to standards with 8,8'-, 8,6'- and 6,8'-, and 6,6'-isomers prepared by transesterification.

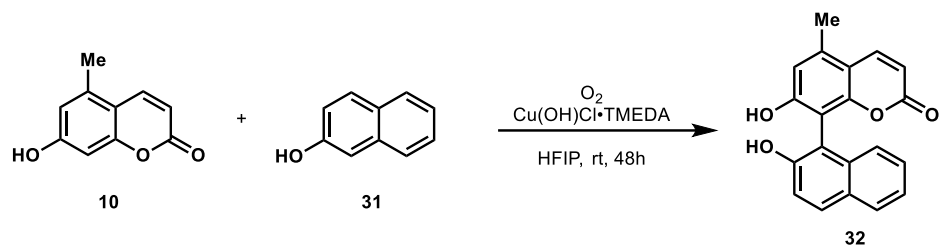

**Entry 2a.** To a solution of 7-hydroxy-5-methyl-2*H*-chromen-2-one (**10**, 50 mg, 0.28 mmol, 1.0 equiv) and 2-naphthol (**31**, 4.0 mg, 0.28 mmol, 1.0 equiv) in HFIP (2.8 mL, 0.10 M) was added Cu(OH)Cl·TMEDA (33 mg, 0.28 mmol, 1.0 equiv) at room temperature and stirred for 48 h.<sup>16</sup> Upon addition of copper complex, reaction mixture turned dark navy blue. The reaction mixture was quenched with 1 mL 0.1 M HCl, inducing a color change from navy to brownish yellow. The reaction was diluted with deionized H<sub>2</sub>O (10 mL), extracted with ethyl acetate (15 mL x 3). The combined organic extracts were washed with brine, dried over Na<sub>2</sub>SO<sub>4</sub>, then concentrated under reduced pressure to afford 111 mg of a brown solid. To confirm the connectivity of the major cross-coupled species (**32**), the crude reaction mixture was compared to authentic standards (see Supplemental Schemes S2-5) by LC-MS. The major product was determined to harbor the 8,1'-connectivity, with an unidentified isomeric minor product that did not match the retention times of available standards. The yield of the 8,1'-product was determined by <sup>1</sup>H NMR as 19% and was calculated by analysis of 20.5 mg of the crude reaction mixture in 1.0 mL of D<sub>6</sub>-Acetone with 5.0 mg (0.0297 mmol) 1,3,5-trimethoxybenzene as an internal standard (Supplemental Figure S87). **HRMS** (ESI) calculated for C<sub>20</sub>H<sub>13</sub>O<sub>4</sub><sup>-</sup> [M-H]<sup>-</sup> = 317.0819, found = 317.0820 *m/z*.

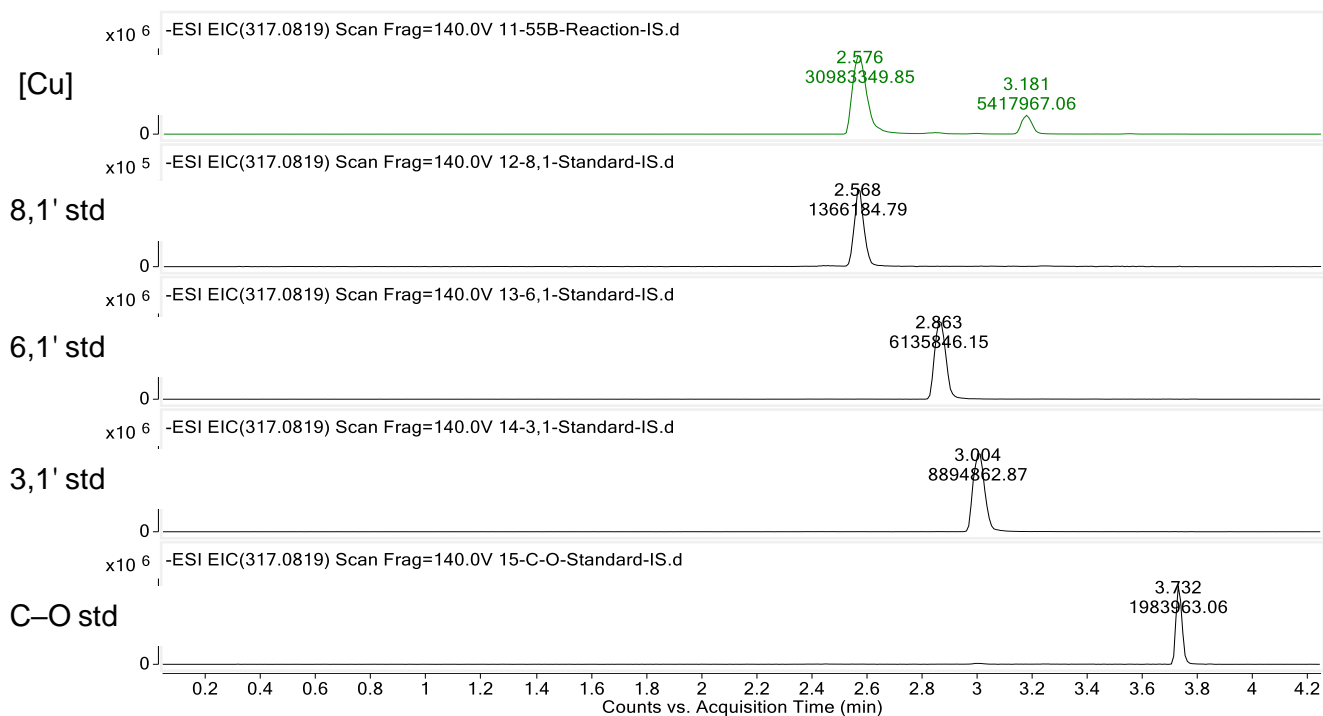

**Supplemental Figure S9.** Extracted ion chromatograms confirm 8,1'-connectivity of the major cross-coupled product.

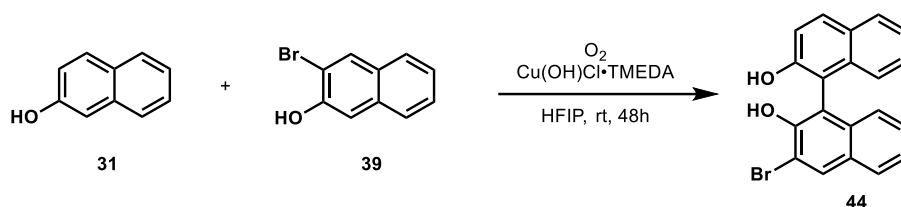

**Entry 3a.** To a solution of 3-bromo-2-naphthol (**39**, 116 mg, 0.520 mmol, 1.00 equiv) and 2-naphthol (**31**, 75 mg, 0.52 mmol, 1.0 equiv) in HFIP (5.2 mL, 0.10 M) was added  $\text{Cu(OH)Cl}\cdot\text{TMEDA}$  (121 mg, 0.520 mmol, 1.00 equiv) at room temperature and stirred for 48 h. The reaction was quenched with 1 mL 0.1 M HCl and diluted with deionized  $\text{H}_2\text{O}$  (10 mL), extracted with ethyl acetate (25 mL x 3). The combined organic extracts were washed with brine, dried over  $\text{Na}_2\text{SO}_4$ , then concentrated under reduced pressure to afford 236 mg of a brown solid. The crude mixture was purified by flash chromatography over silica gel with a gradient of 5% to 30% ethyl acetate in hexanes, recovering 44 mg of cross-coupled product **44** as an off-white solid in a 23% yield with minor impurities.  $^1\text{H NMR}$  (400 MHz,  $\text{CDCl}_3$ )  $\delta$  8.28 (s, 1H), 7.97 (d,  $J = 8.9$  Hz, 1H), 7.89 (d,  $J = 8.1$  Hz, 1H), 7.82 (d,  $J = 8.2$  Hz, 1H), 7.43–7.34 (m, 3H), 7.34–7.28 (m, 2H), 7.14 (d,  $J = 8.4$  Hz, 1H), 7.10 (d,  $J = 8.3$  Hz, 1H), 5.61 (s, 1H), 5.02 (s, 1H). All spectra obtained were consistent with literature values.<sup>16,17</sup> **HRMS** (ESI) calculated for  $\text{C}_{20}\text{H}_{12}\text{BrO}_2$   $[\text{M-H}]^- = 363.0026$ , found 365.0007  $m/z$ .

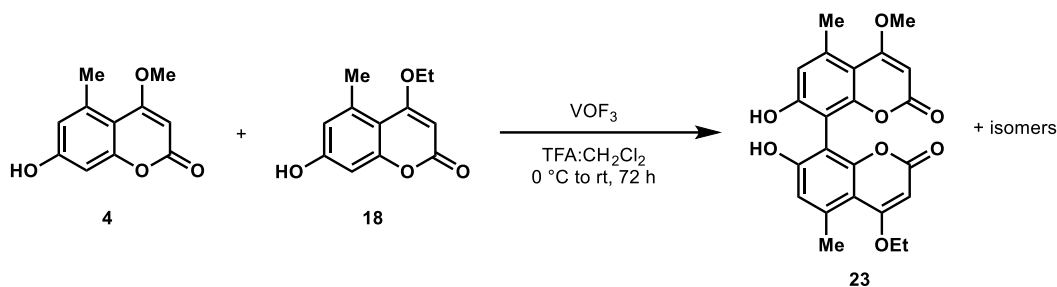

**Entry 1b.** To a solution of 7-hydroxy-4-methoxy-5-methyl-2H-chromen-2-one (**4**; 100 mg, 0.48 mmol, 1.0 equiv) and 4-ethoxy-7-hydroxy-5-methyl-2H-chromen-2-one (**18**; 107 mg, 0.480 mmol, 1.00 equiv) in dry  $\text{CH}_2\text{Cl}_2$  (4.0 mL, 0.125 M) and trifluoroacetic acid (1 mL, 0.5 M) was added  $\text{VOF}_3$  (120 mg, 0.97 mmol, 2.00 equiv) at 0 °C, then warmed to room temperature and stirred for 48 h.<sup>21-24</sup> Upon addition of the vanadium complex, the reaction mixture turned a deep navy blue. The reaction was quenched by addition of  $\text{H}_2\text{O}$  and extracted with ethyl acetate (15 mL x 3). The combined extracts were washed with brine, dried over  $\text{Na}_2\text{SO}_4$ , and concentrated under reduced pressure to afford a pale-yellow solid (112 mg). The reaction resulted in a complex, inseparable mixture of multiple dimers and cross-coupled products combined with remaining coumarin starting materials. The crude mixture was analyzed by LC-MS and percent conversions were calculated. The connectivity of the major cross-coupled isomer (**23**) was determined by comparison of standards with known connectivity on analytical scale. **HRMS** (ESI) calculated for  $\text{C}_{23}\text{H}_{19}\text{O}_8$   $[\text{M-H}]^- = 423.1085$ , found = 423.1085  $m/z$ .

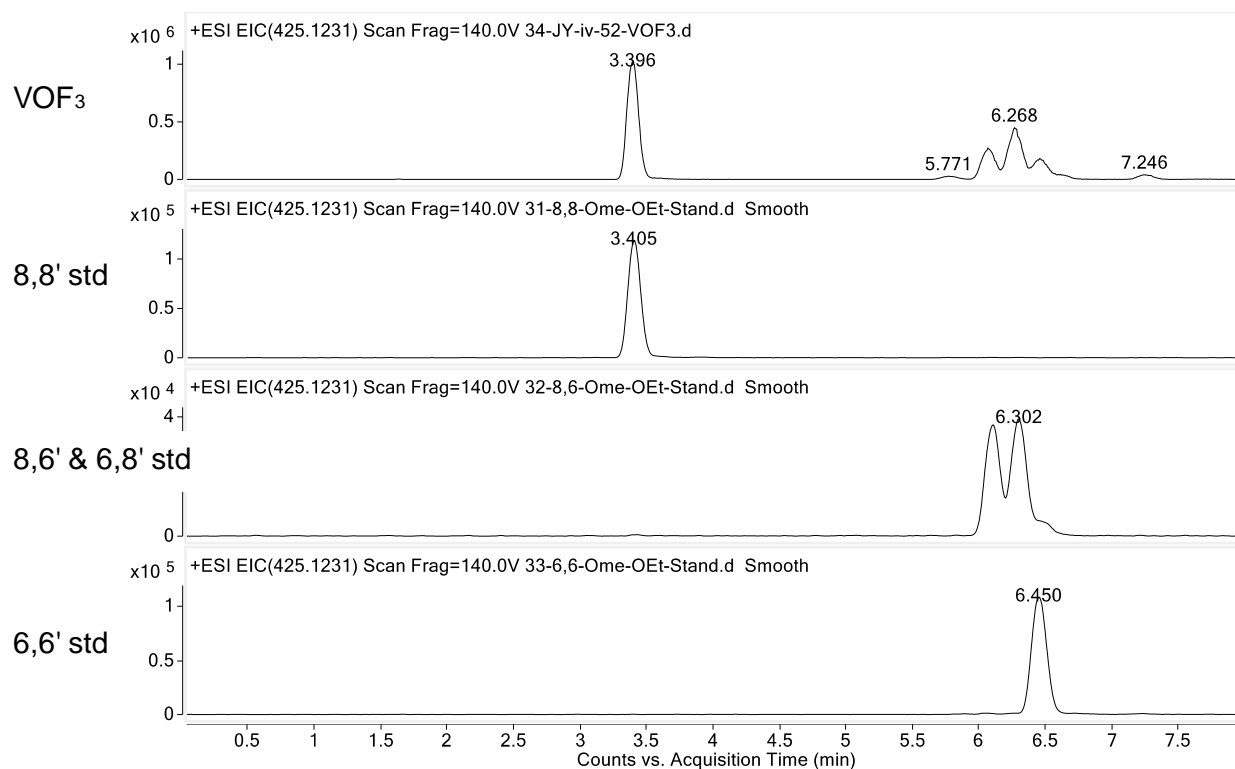

**Supplemental Figure S10.** Extracted ion chromatograms (EICs) of cross-coupled products (1B) compared to standards with 8,8'-, 8,6'- and 6,8'-, and 6,6'-isomers prepared by transesterification.

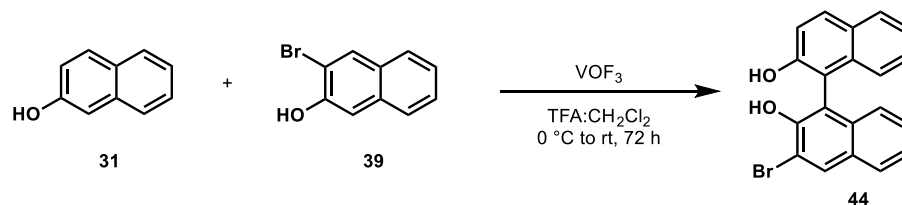

**Entry 3b.** To a solution of 3-bromo-2-naphthol (**39**, 77 mg, 0.35 mmol, 1.0 equiv) and 2-naphthol (**31**, 50.0 mg, 0.350 mmol, 1.00 equiv) in dry  $\text{CH}_2\text{Cl}_2$  (2.80 mL, 0.125 M) and trifluoroacetic acid (0.7 mL, 0.5 M) was added  $\text{VOF}_3$  (85 mg, 0.69 mmol, 2.0 equiv) at 0 °C, then warmed to room temperature and stirred for 48 h.<sup>21-24</sup> Upon addition of the vanadium complex, the reaction mixture gradually turned orange then green over 72 h. The reaction was quenched by addition of  $\text{H}_2\text{O}$  and extracted with ethyl acetate (25 mL x 3). The combined extracts were washed with brine, dried over  $\text{Na}_2\text{SO}_4$ , and concentrated under vacuum to give a black solid (124 mg). The crude mixture was purified by flash chromatography over silica gel with a gradient of 0 to 25 % ethyl acetate in hexanes. The fractions contained a total of 5.8 mg of **44** in a 5% yield, calculated by comparison to an internal standard by  $^1\text{H}$  NMR in  $\text{CDCl}_3$ . Fraction 2 (29 mg) contained 5.6 mg (33  $\mu\text{mol}$ ) of 1,3,5-trimethoxybenzene as an internal standard and 4.7 mg of **44**; combined fractions 3-5 (33 mg) contained 7.5 mg (45  $\mu\text{mol}$ ) of 1,3,5-trimethoxybenzene and 1.1 mg of **44** (Supplemental Figure S88). **HRMS** (ESI) calculated for  $\text{C}_{20}\text{H}_{12}\text{BrO}_2^-$  [ $\text{M-H}$ ] 363.0026, found = 317.0809  $m/z$ .

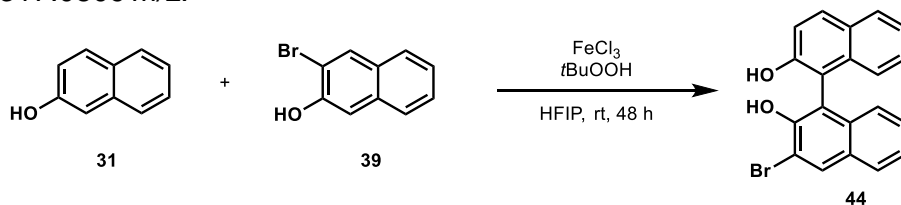

**Entry 3c.** To a solution of 3-bromo-2-naphthol (**39**, 116 mg, 0.520 mmol, 1.00 equiv) and 2-naphthol (**31**, 75.0 mg, 0.520 mmol, 1.00 equiv) in HFIP (5.2 mL, 0.10 M) was added anhydrous  $\text{FeCl}_3$  (17 mg, 0.10 mmol, 0.20 equiv) and 75  $\mu\text{L}$   $t\text{-BuOOH}$  (70% solution, 0.57 mmol, 1.1 equiv) at room temperature and stirred for 48 h.<sup>25</sup> The reaction was quenched by the addition of water and the aqueous phase was extracted with ethyl acetate (25 mL x 3). The organic layers were combined, washed with brine, dried over  $\text{Na}_2\text{SO}_4$ , filtered, and evaporated under



reduced pressure to afford 229 mg of a dark brown solid. The reaction resulted in a mixture of dimers and one major cross-coupled product. The crude mixture was purified by flash chromatography over silica gel with a gradient of 0 to 20% ethyl acetate in hexanes, resulting in mixed fractions. The fractions containing the cross-coupled product **44** were combined and concentrated under reduced pressure to afford 36.2 mg of a yellow solid. The yield was calculated as 6.4% using the entire 36.2 mg mixture in 1 mL CDCl<sub>3</sub> and 5 mg mesitylene (97% purity, 0.0404 mmol) as the internal standard (Supplemental Figure S89). **HRMS** (ESI) *m/z* calculated for C<sub>20</sub>H<sub>12</sub>BrO<sub>2</sub><sup>-</sup> [M-H]<sup>-</sup> 363.0026, found 363.0022 *m/z*.

**General procedure for Fe(TPP)Cl mediated coupling (column D).** Carried out on analytical scale only due to low or no formation of cross-coupled product. Each phenolic substrate was used in a 1:1 ratio (1 equiv each, 5 mg scale) and were dissolved in a solution of Fe(III)meso-tetraphenylporphine chloride, CAS# 16456-81-8 (Fe(TPP)Cl, 0.2 equiv) in HFIP (0.08 M), followed by addition of *t*-BuOOH (70%, 1.1 equiv) at room temperature.<sup>26</sup> Each reaction was stirred at room temperature and monitored by LC-MS over 48 h. Trace amounts (<2% conversion) of cross-coupled product or decomposition of starting materials was observed in each case, with detailed LC-MS traces shown in Supplemental Figures S20-22.

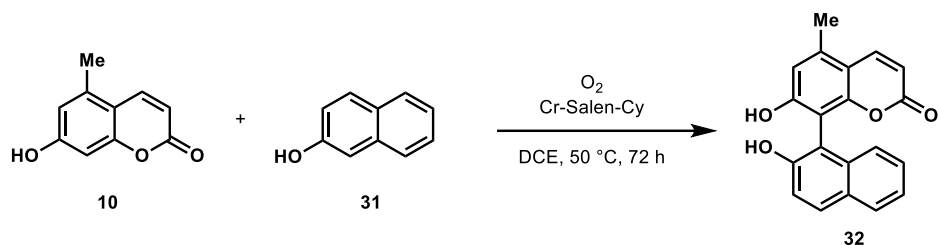

**Entry 2e.** To a solution of 7-hydroxy-5-methyl-2*H*-chromen-2-one (**10**; 50 mg, 0.28 mmol, 1.0 equiv) and 2-naphthol (**31**; 41 mg, 0.28 mmol, 1.0 equiv) in 1,2-dichloroethane (2.8 mL, 0.10 M) was added 18 mg (1*R*,2*R*)-(-)-[1,2-Cyclohexanediamino-*N,N'*-bis(3,5-di-*t*-butylsalicylidene)]chromium(III) chloride, CAS# 164931-83-3 (Cr-Salen-Cy, 28 μmol, 0.10 equiv) and heated to 50 °C for 72 h.<sup>27</sup> The reaction mixture was diluted with ethyl acetate, filtered through silica gel, and evaporated under reduced pressure to afford 97 mg of a dark brown solid. LC-MS analysis revealed that the reaction resulted in a mixture of dimers and multiple cross-coupled products. Analysis by <sup>1</sup>H NMR did not reveal significant formation of cross-coupled product, with only trace amounts of cross-coupled products observed by LC-MS.

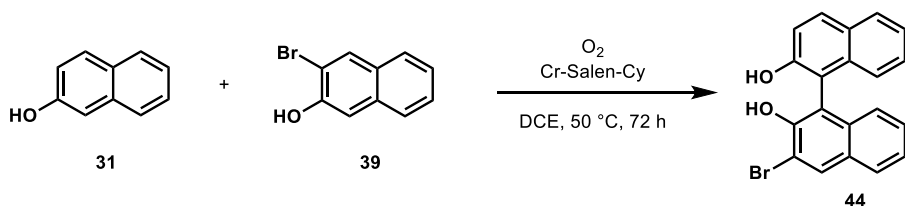

**Entry 3e.** To a solution of 3-bromo-2-naphthol (**39**; 116 mg, 0.520 mmol, 1.00 equiv) and 2-naphthol (**31**; 75.0 mg, 0.520 mmol, 1.00 equiv) in 1,2-dichloroethane (5.2 mL, 0.10 M) was added 33 mg Cr-Salen-Cy catalyst (52 μmol, 0.10 equiv) and heated to 50 °C for 72 h.<sup>27</sup> The reaction mixture was diluted with ethyl acetate, filtered through silica gel, and evaporated under reduced pressure to afford 223 mg of a dark brown solid. The reaction resulted in a mixture of dimers and one major cross-coupled product. The reaction was purified by flash chromatography over silica gel with a gradient of 0 to 20% ethyl acetate in hexanes, to provide 10.1 mg of **44** (5% yield) as a yellow solid with impurities. <sup>1</sup>H NMR (600 MHz, CDCl<sub>3</sub>) δ 8.28 (s, 1H), 7.89 (d, *J* = 9.4 Hz, 1H), 7.83 (d, *J* = 8.2 Hz, 1H), 7.39 (dddd, *J* = 16.3, 8.1, 6.7, 1.1 Hz, 3H), 7.33 – 7.28 (m, 2H), 7.15 (d, *J* = 8.4 Hz, 1H), 7.10 (d, *J* = 8.4 Hz, 1H), 5.57 (s, 1H), 4.97 (s, 1H). All spectra obtained were consistent with literature values.<sup>16,17</sup> **HRMS** (ESI) calculated for C<sub>20</sub>H<sub>12</sub>BrO<sub>2</sub><sup>-</sup> [M-H]<sup>-</sup> = 363.0026, found = 363.0025 *m/z*.

## LC-MS traces for chemical oxidative coupling reactions

Reactions were carried out on analytical scale and analyzed by LC-MS. For each reaction, extracted ion chromatograms (EICs) of the starting materials, A and B, cross-coupled products (AB), and dimers (AA and BB) are provided. The number of peaks for each product mass is used to assess the number of products formed in each reaction as separation of constitutional isomers is assumed.

**Supplemental Figure S11.** Oxidative cross-coupling of **4** and **18** by Cu(OH)Cl·TMEDA (Supplemental Table S1, Entry 1a).

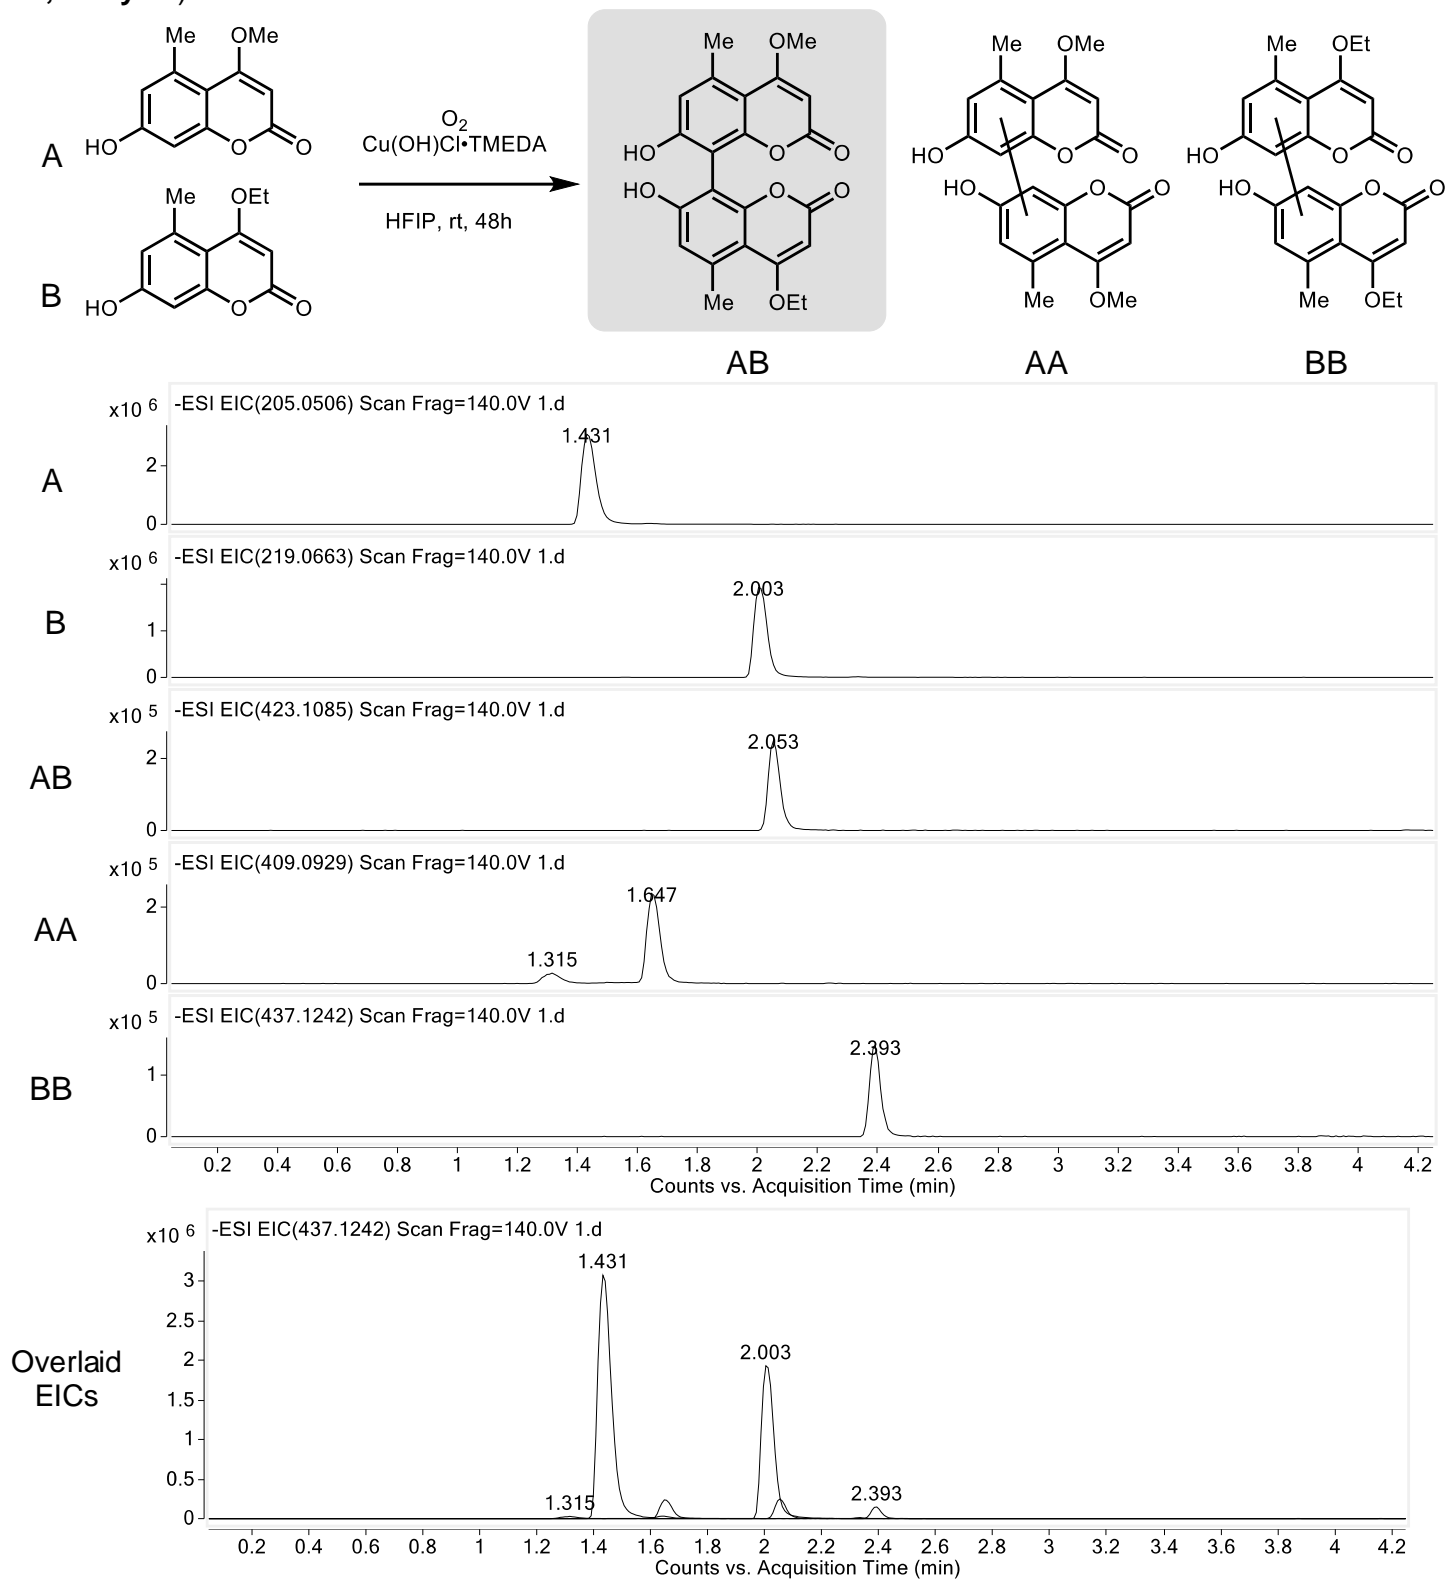

**Supplemental Figure S12.** Oxidative cross-coupling of **10** and **31** by Cu(OH)Cl·TMEDA (Supplemental Table S1, Entry 2a).

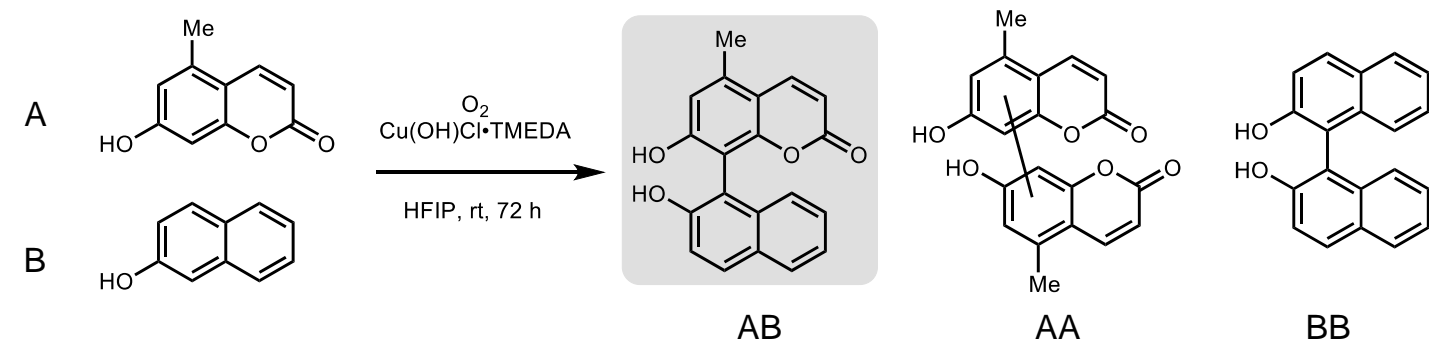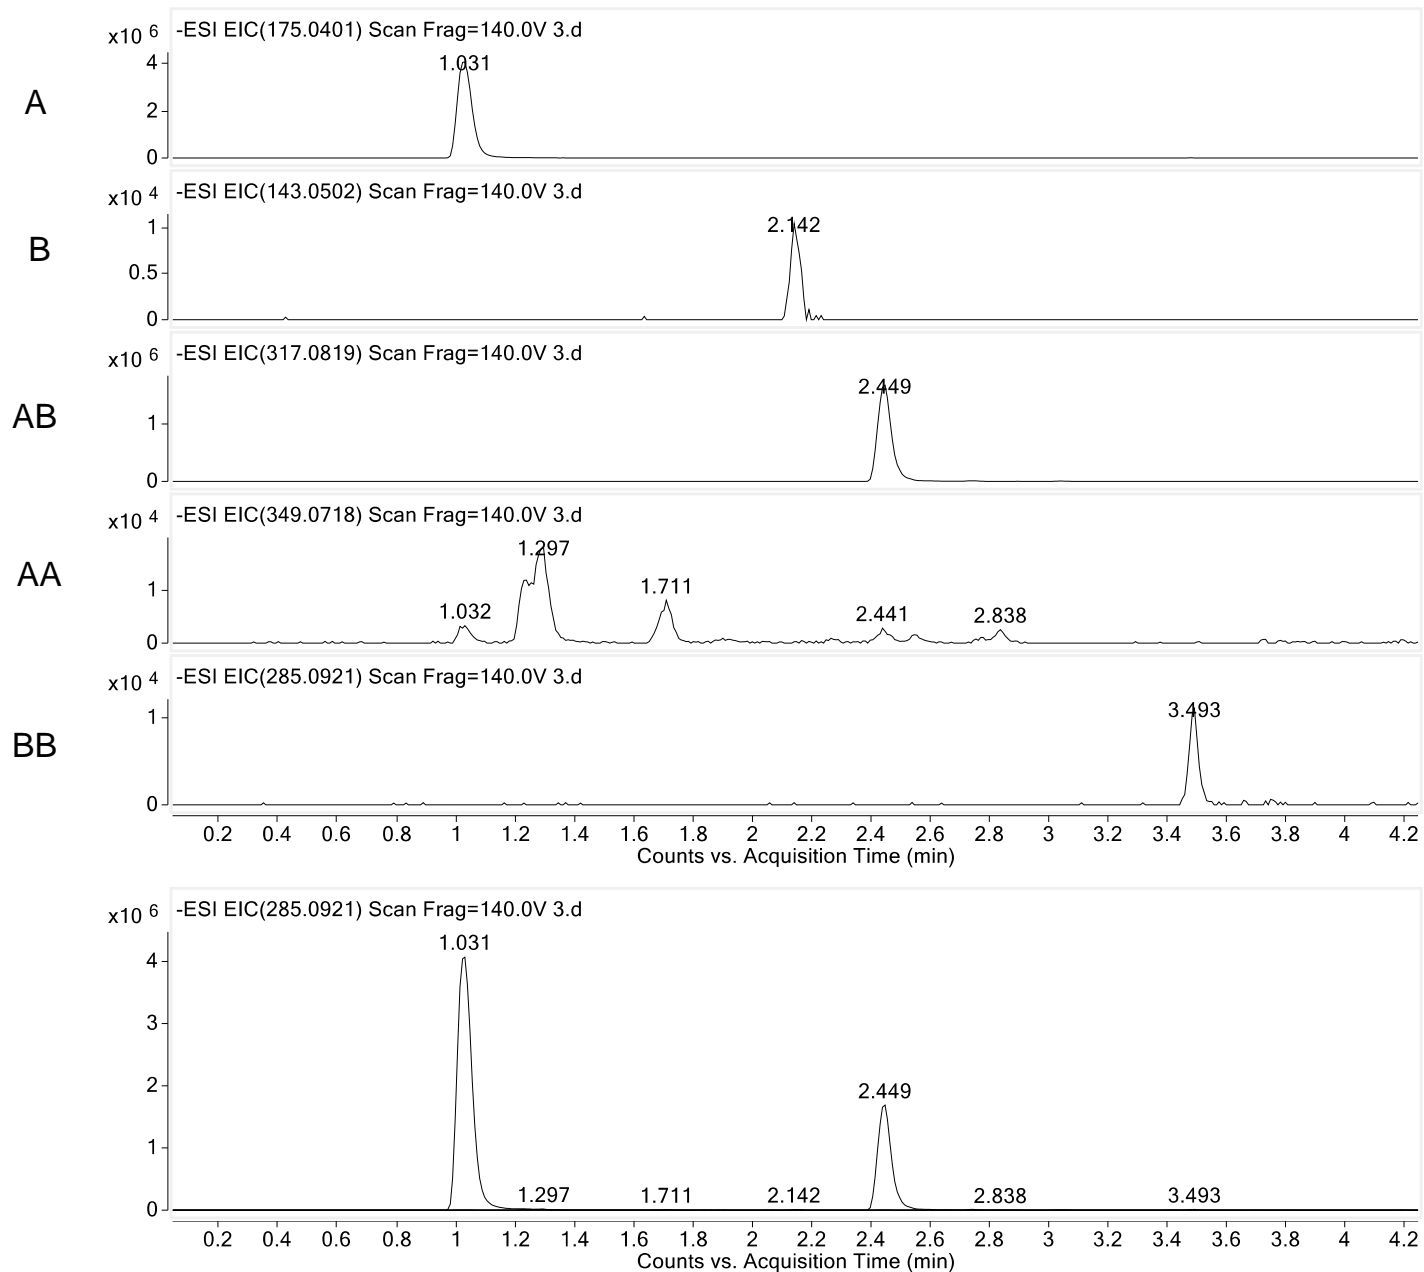

**Supplemental Figure S13.** Oxidative cross-coupling of **31** and **39** by Cu(OH)Cl·TMEDA (Supplemental Table S1, Entry 3a).

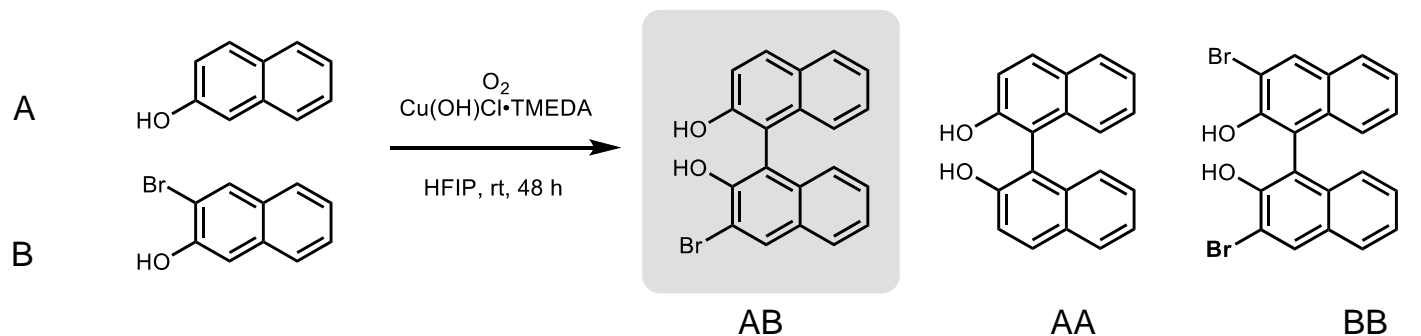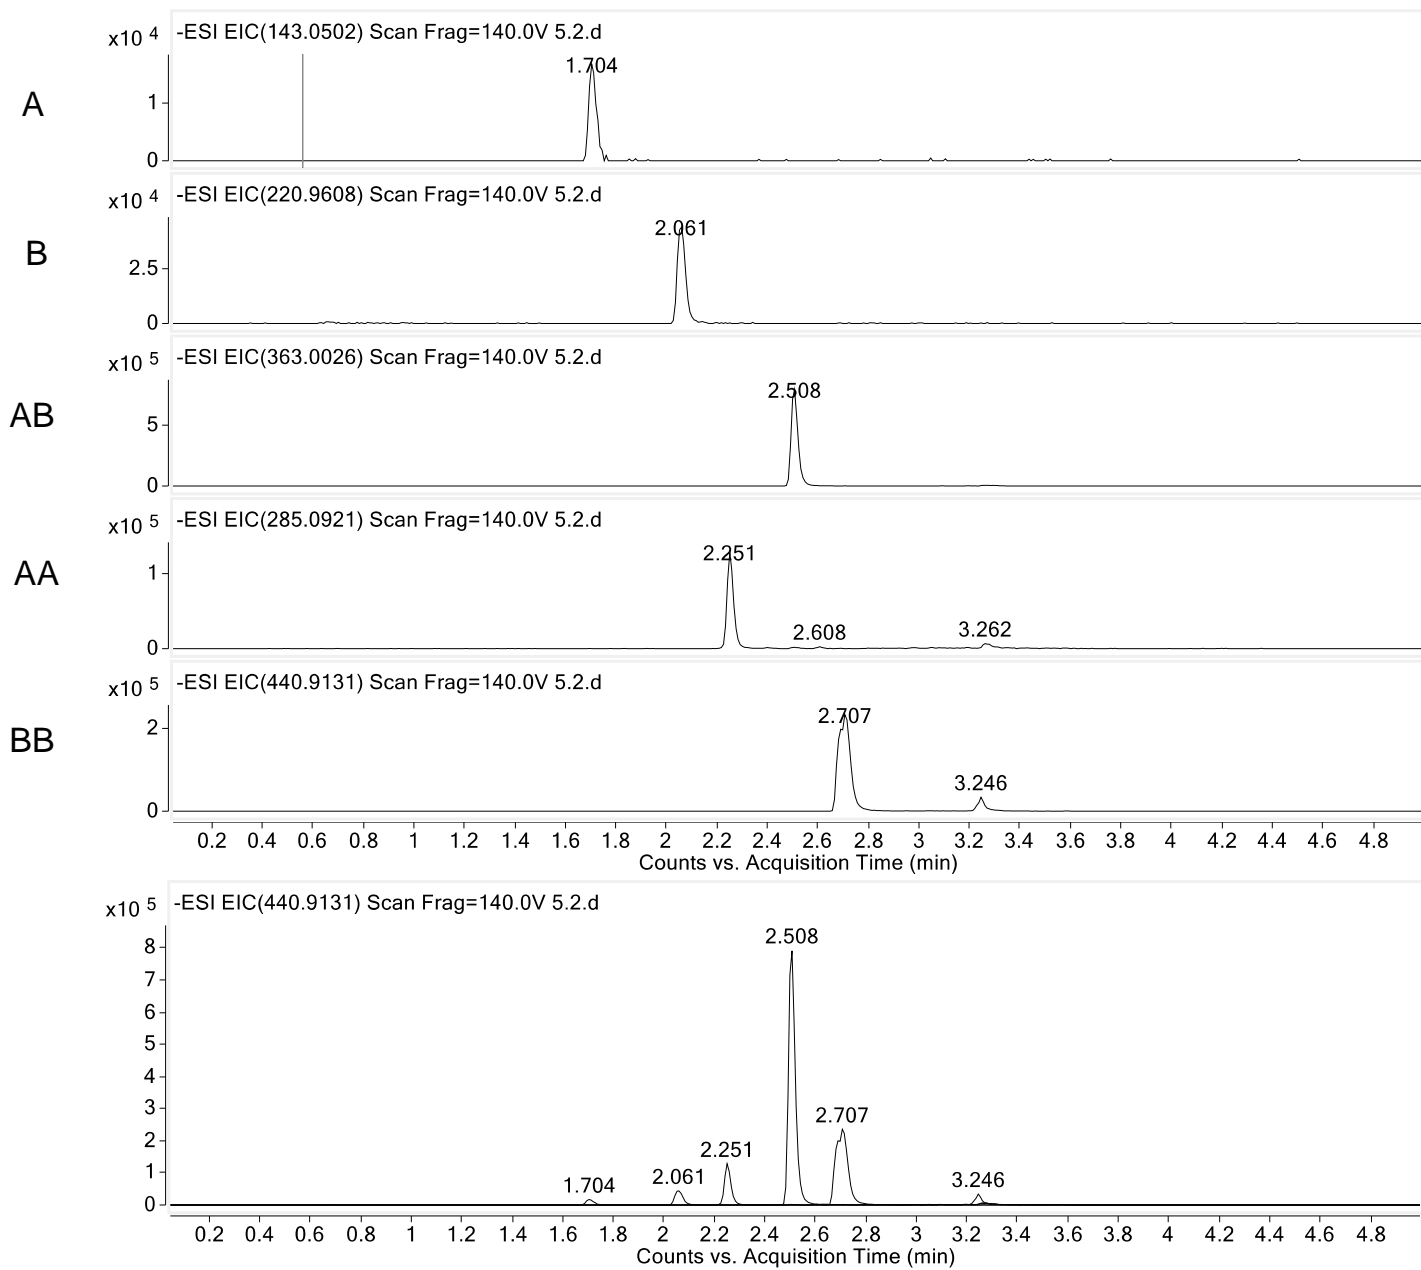

**Supplemental Figure S14.** Oxidative cross-coupling of **4** and **18** by  $\text{VOF}_3$  (**Supplemental Table S1, Entry 1b**).

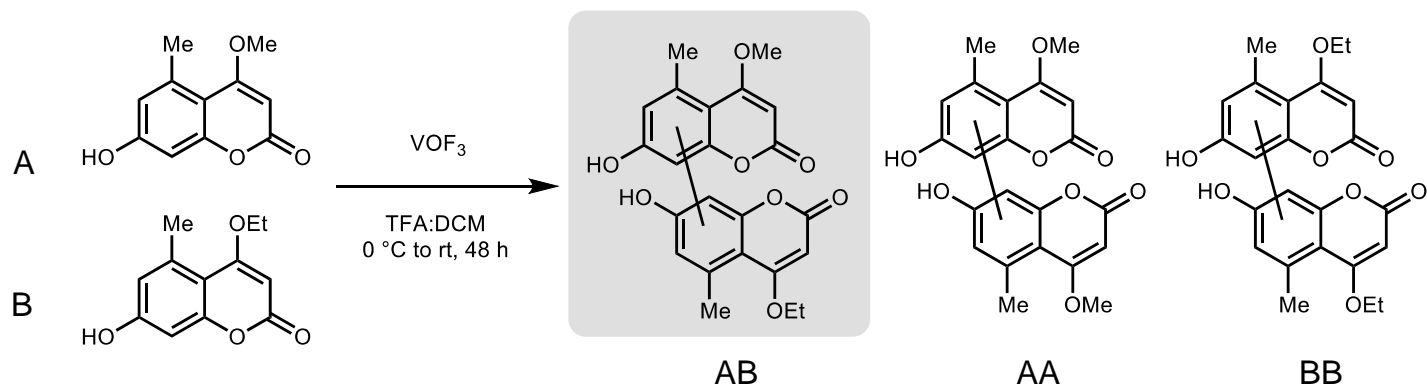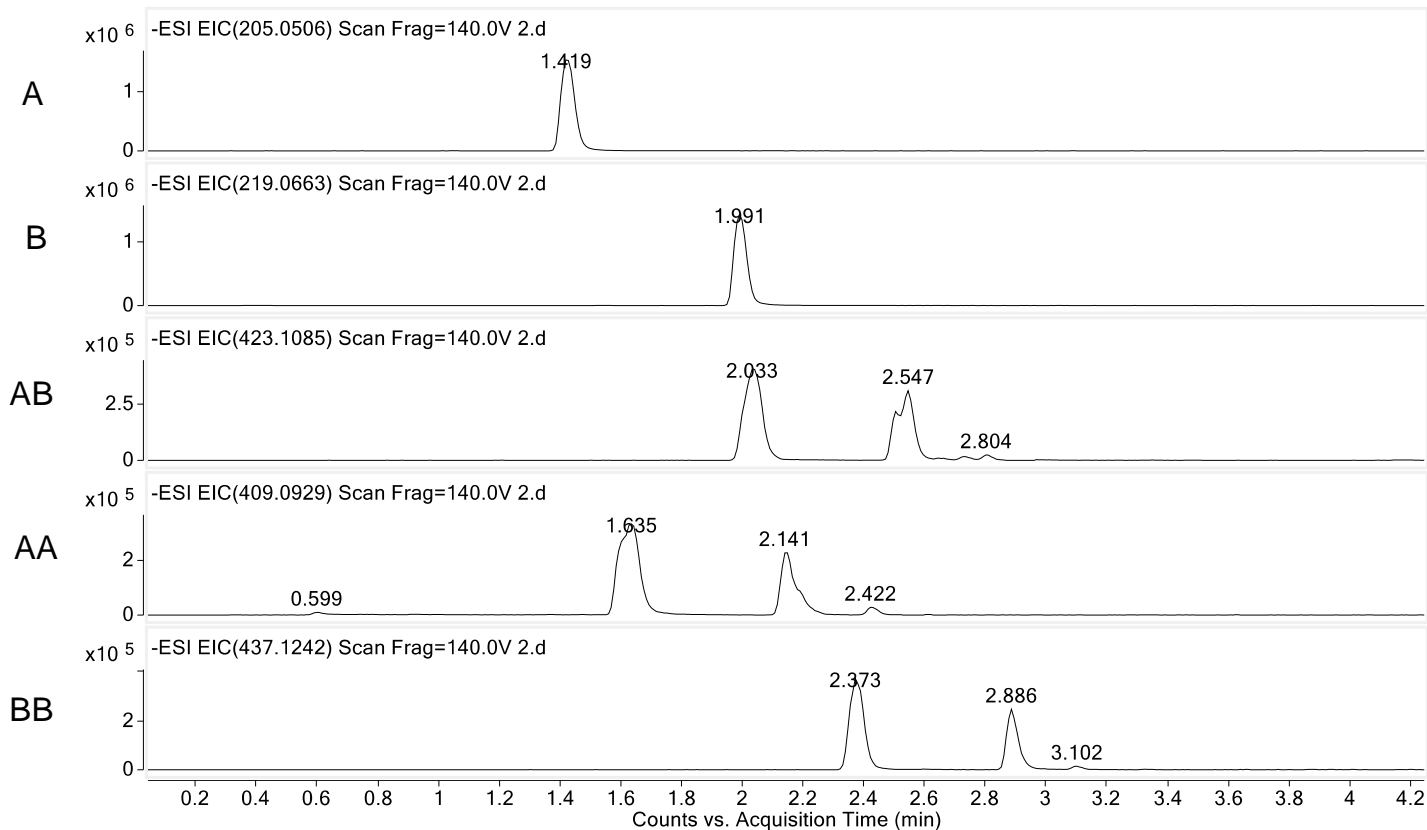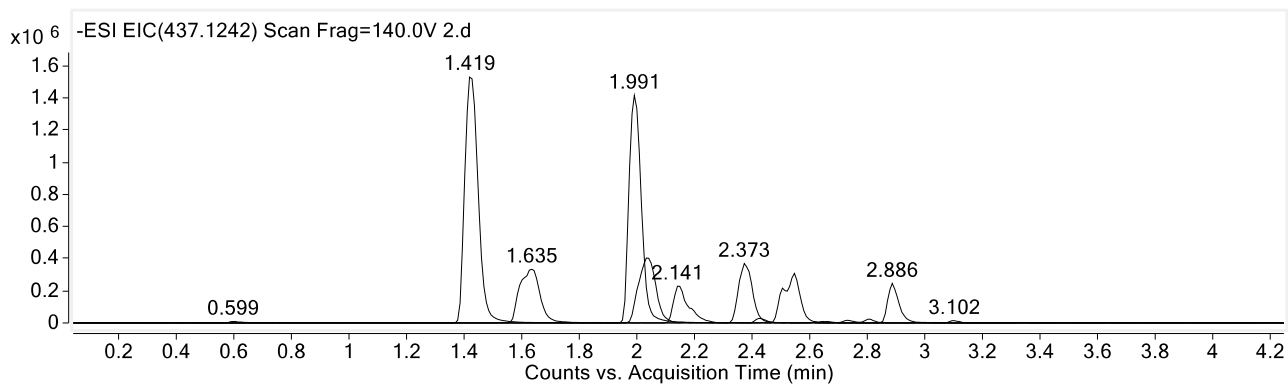

**Supplemental Figure S15.** Oxidative cross-coupling of **10** and **31** by  $\text{VOF}_3$  (**Supplemental Table S1, Entry 2b**).

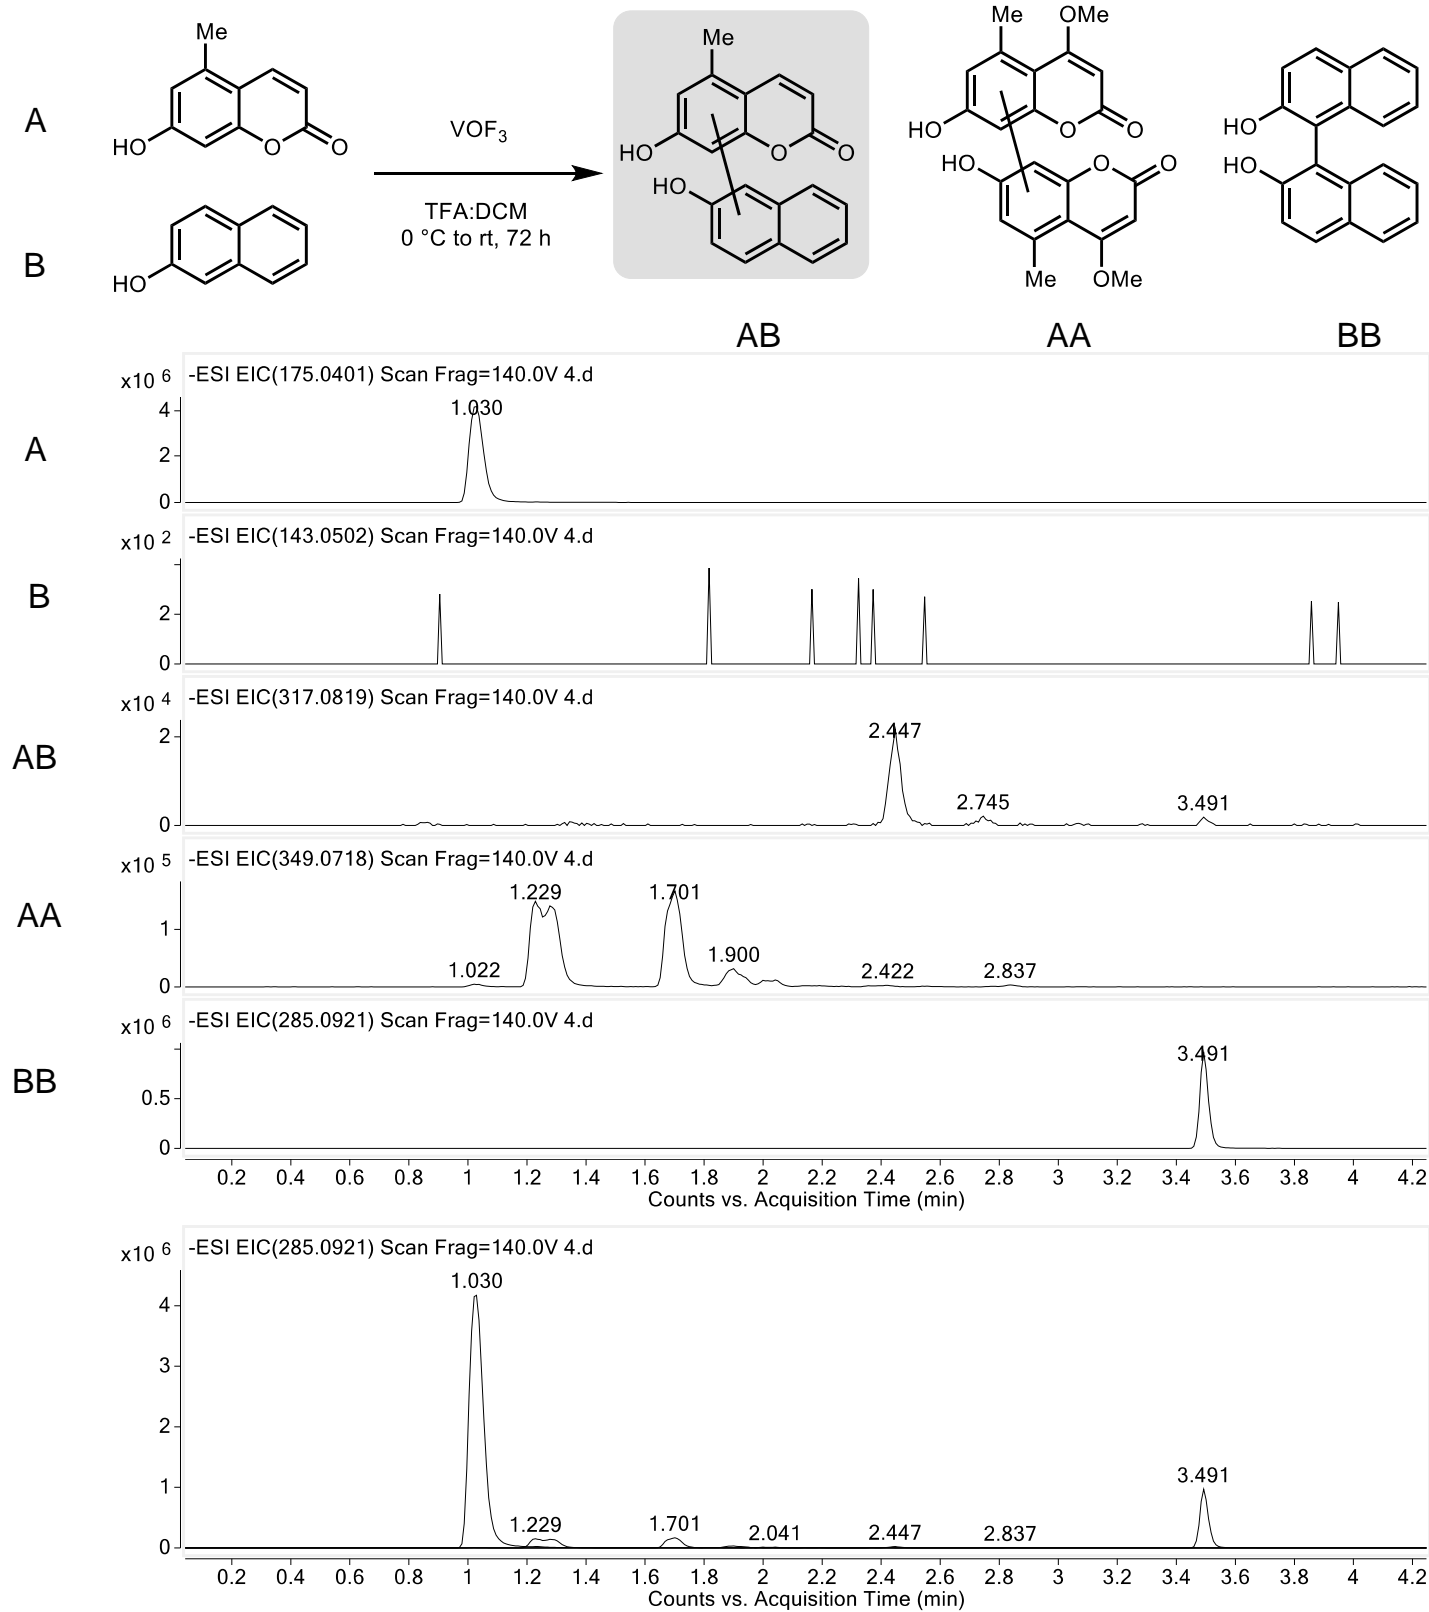

**Supplemental Figure S16.** Oxidative cross-coupling of **31** and **39** by  $\text{VOF}_3$  (**Supplemental Table S1, Entry 3b**).

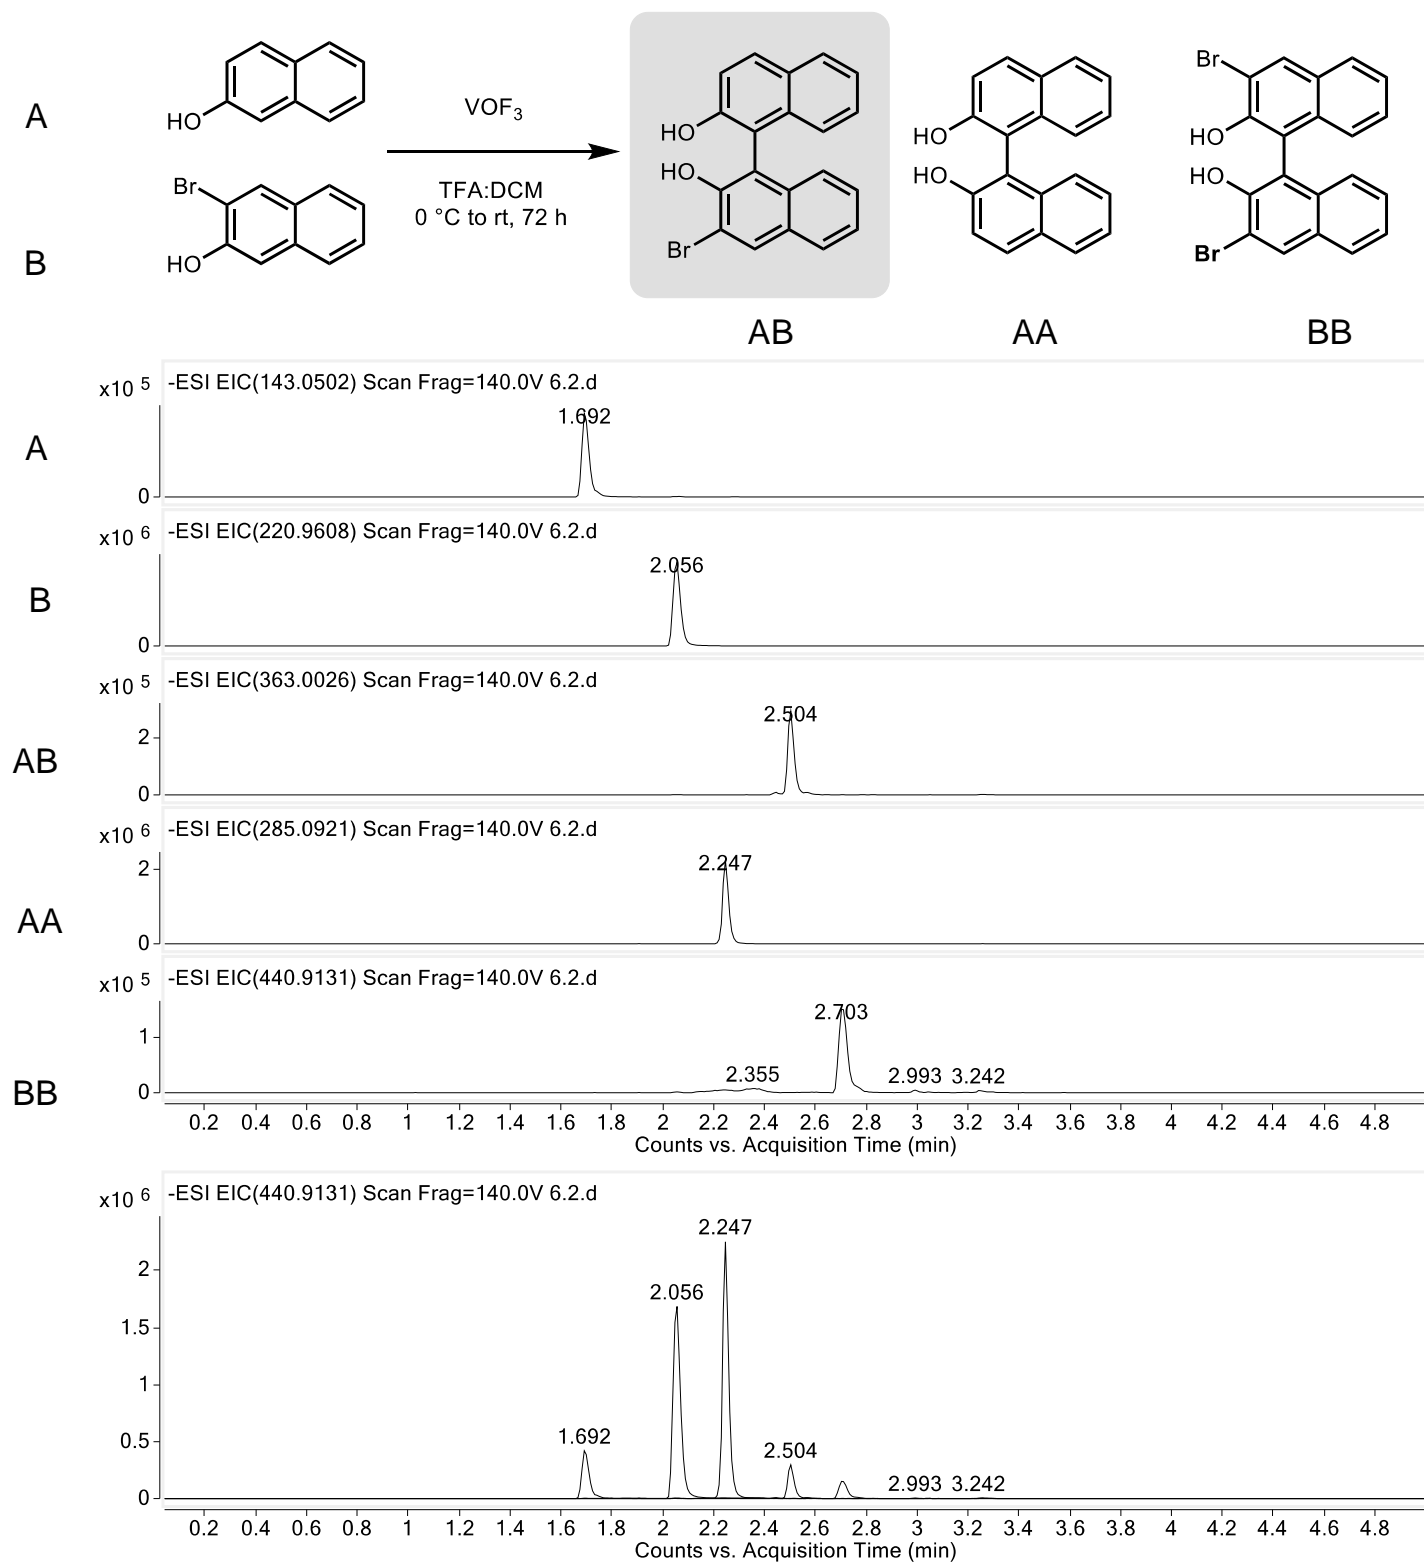

**Supplemental Figure S17.** Oxidative cross-coupling of **4** and **18** by FeCl<sub>3</sub> (Supplemental Table S1, Entry 1c).

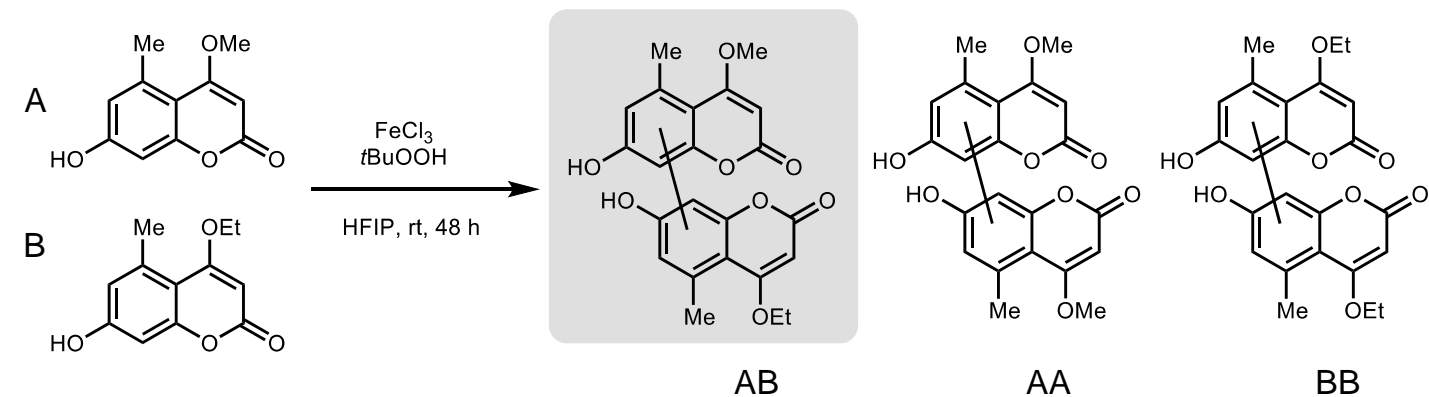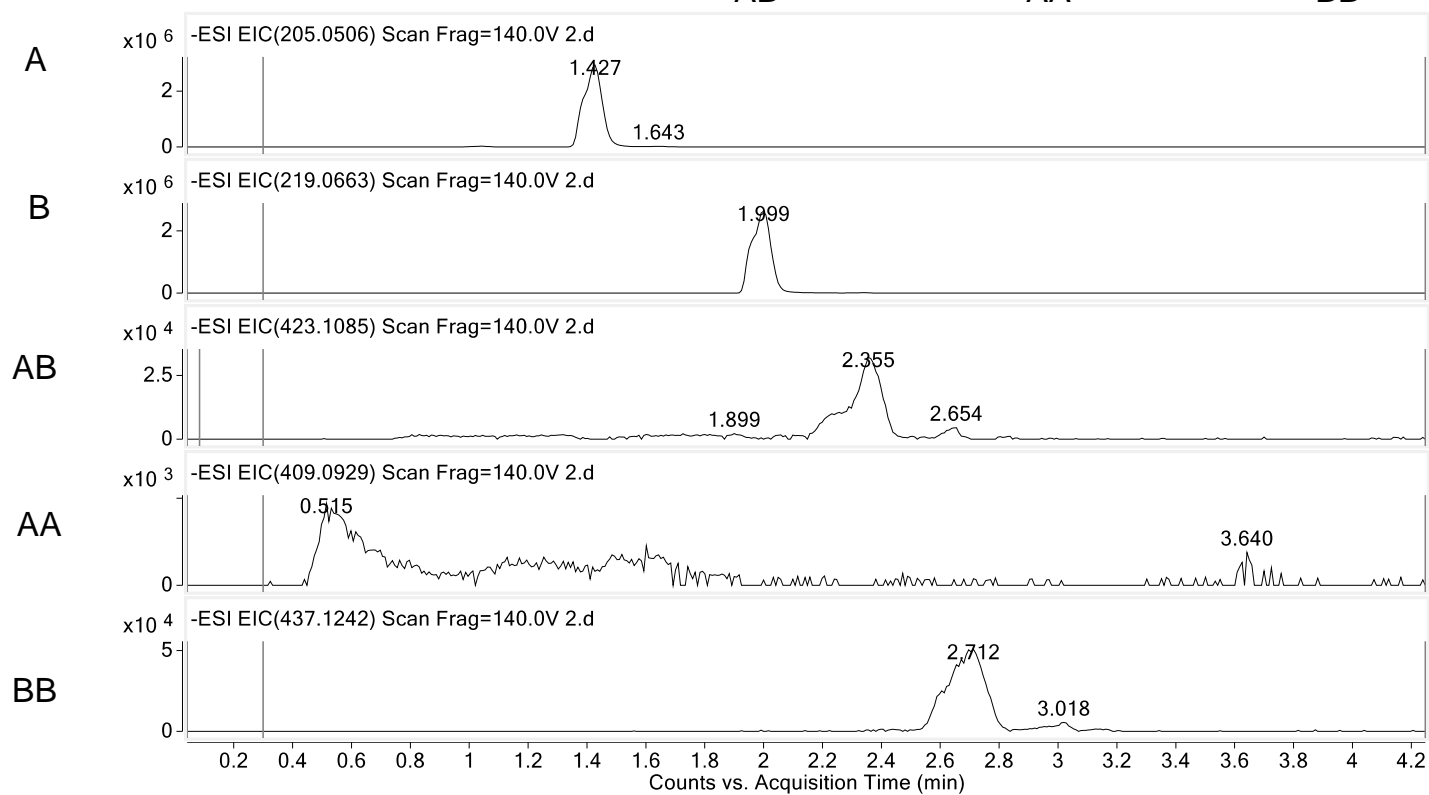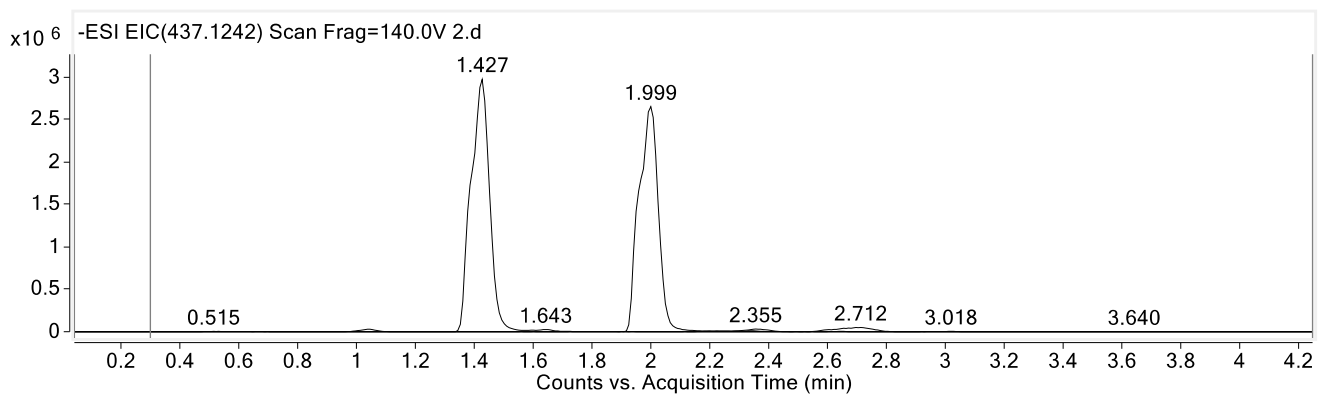



**Supplemental Figure S18.** Oxidative cross-coupling of **10** and **31** by  $\text{FeCl}_3$  (**Supplemental Table S1, Entry 2c**).

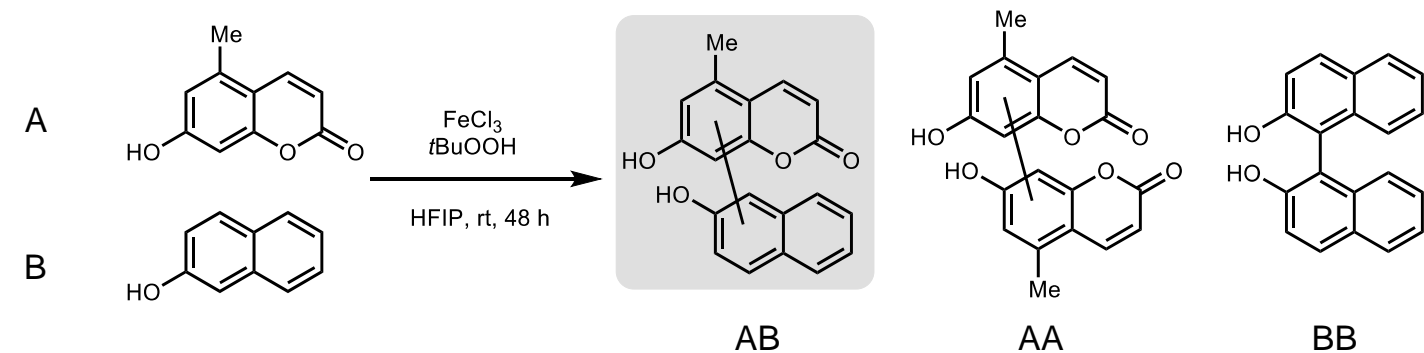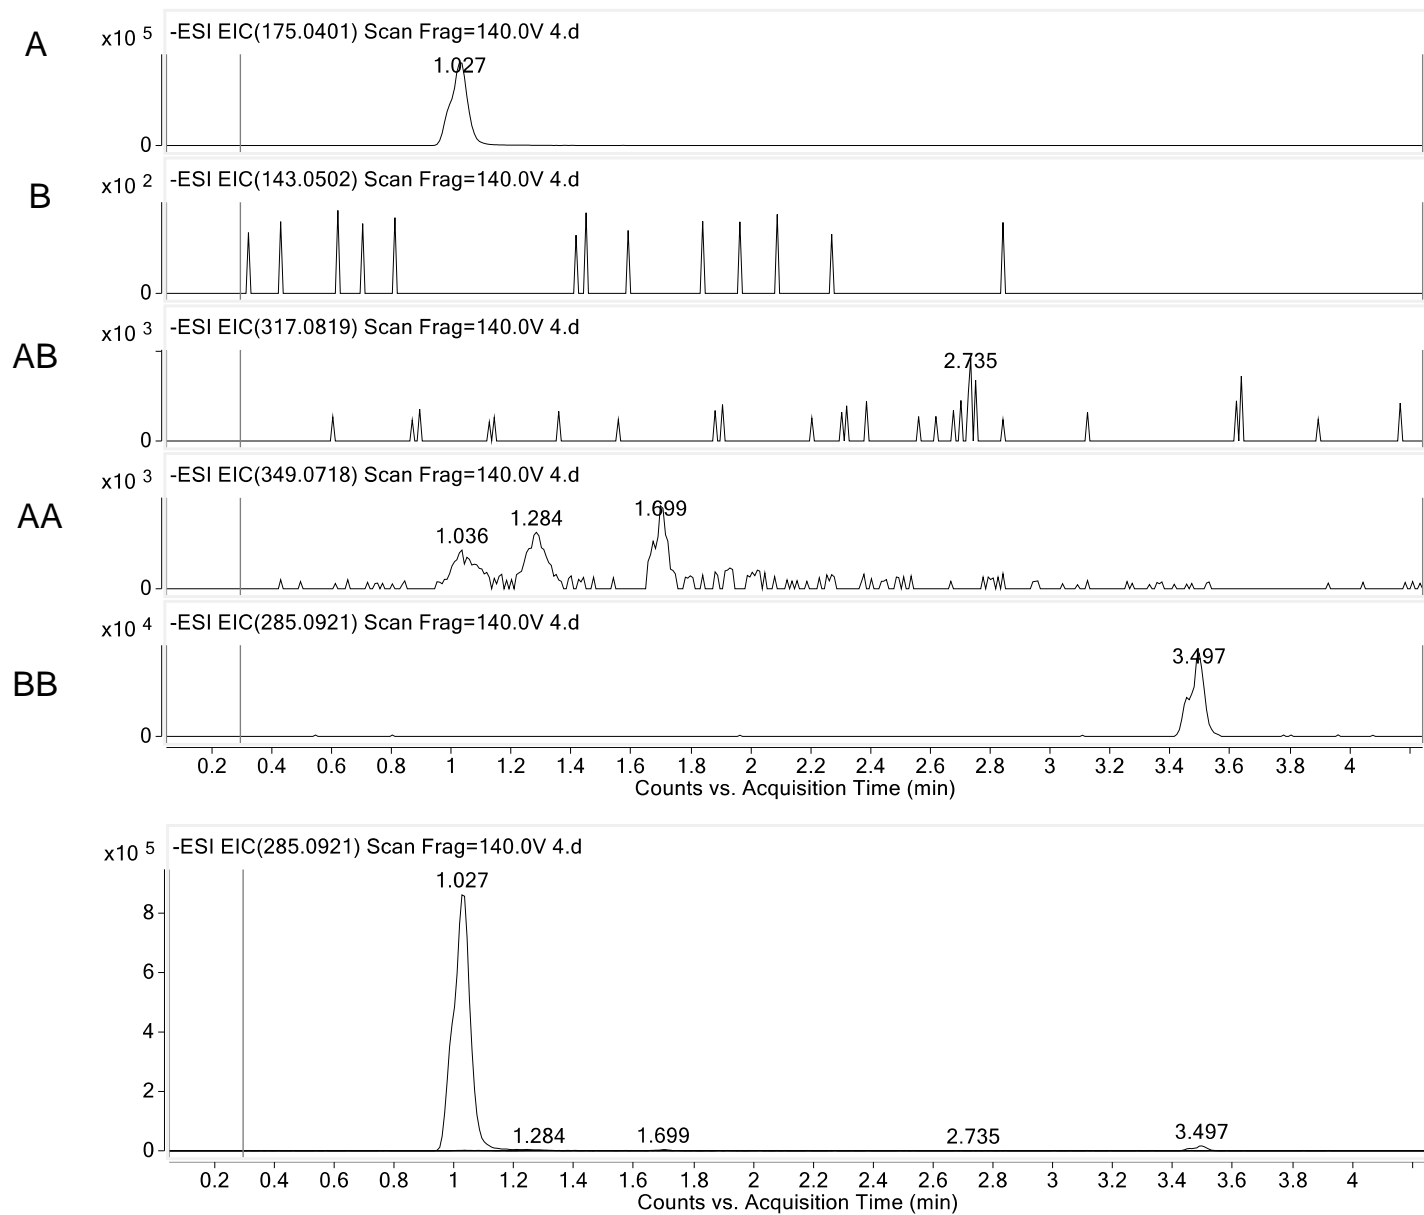

**Supplemental Figure S19.** Oxidative cross-coupling of **31** and **39** by  $\text{FeCl}_3$  (**Supplemental Table S1, Entry 3c**).

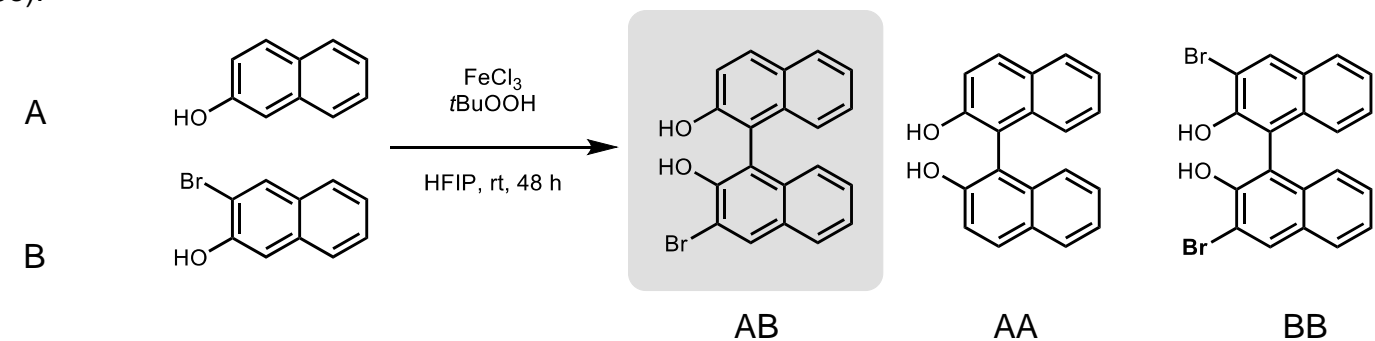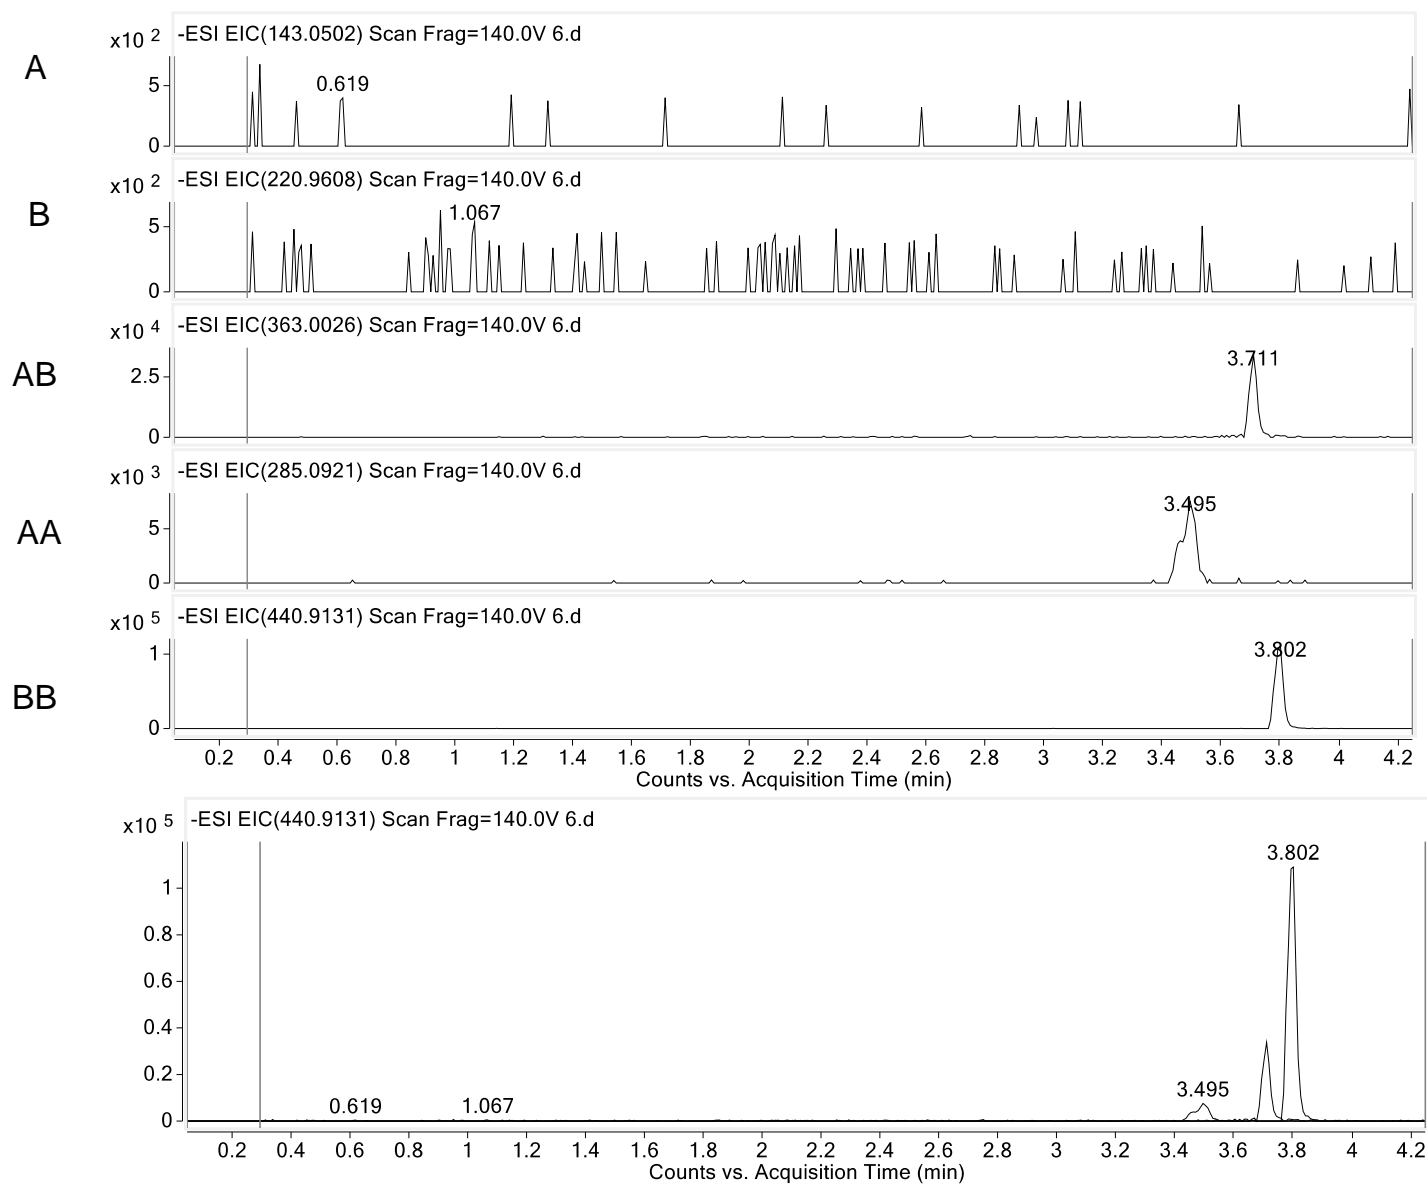

**Supplemental Figure S20.** Oxidative cross-coupling of **4** and **18** by Fe(TPP)Cl (Supplemental Table S1, Entry 1d).

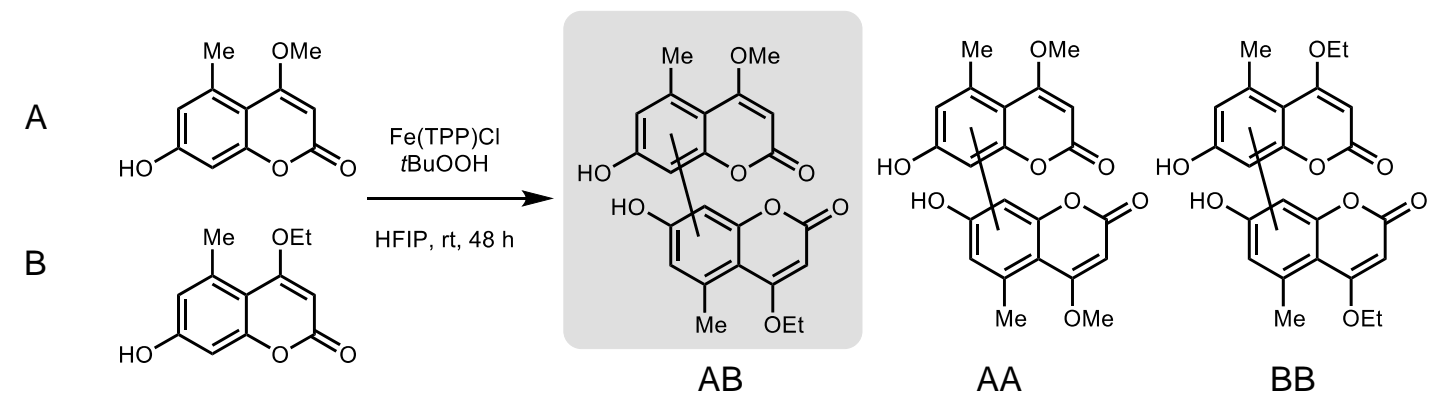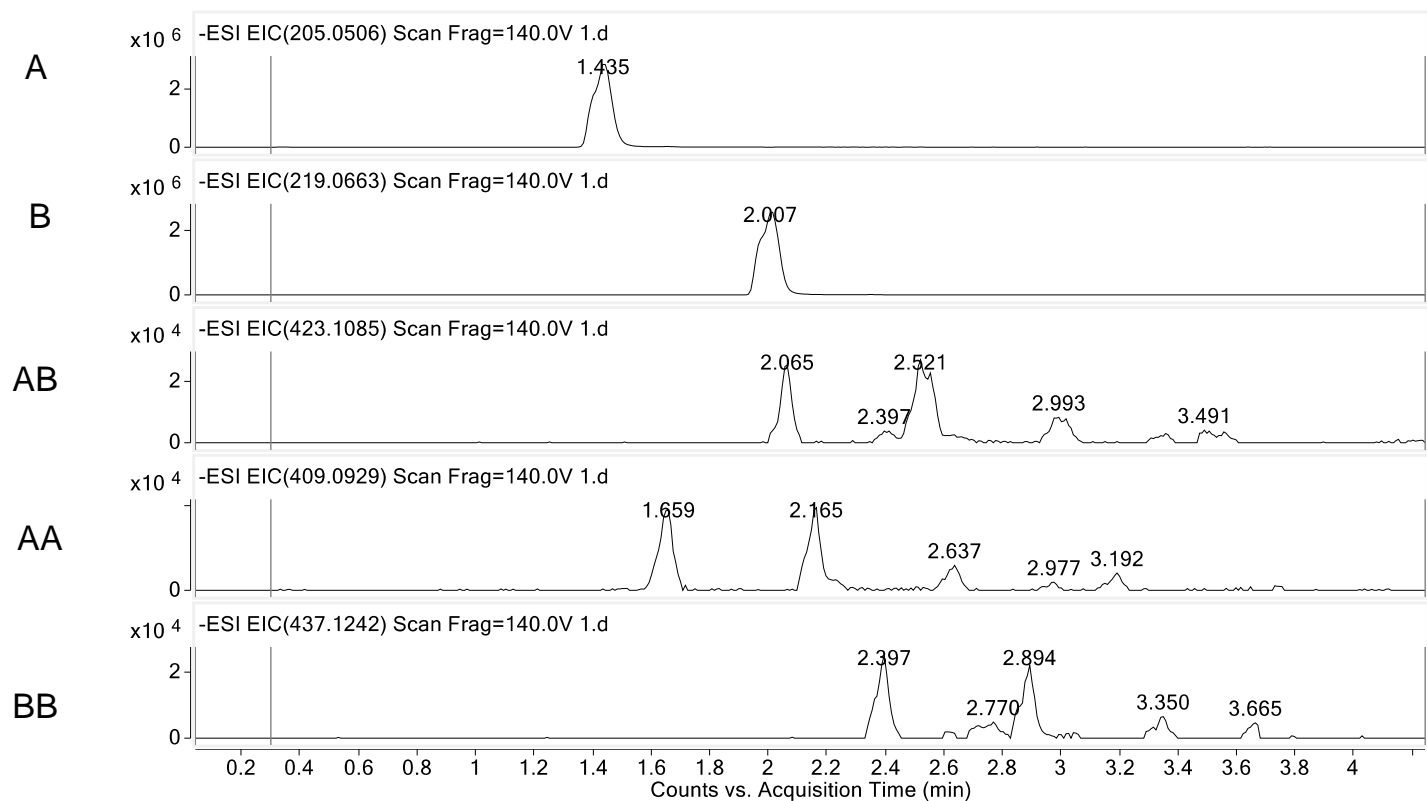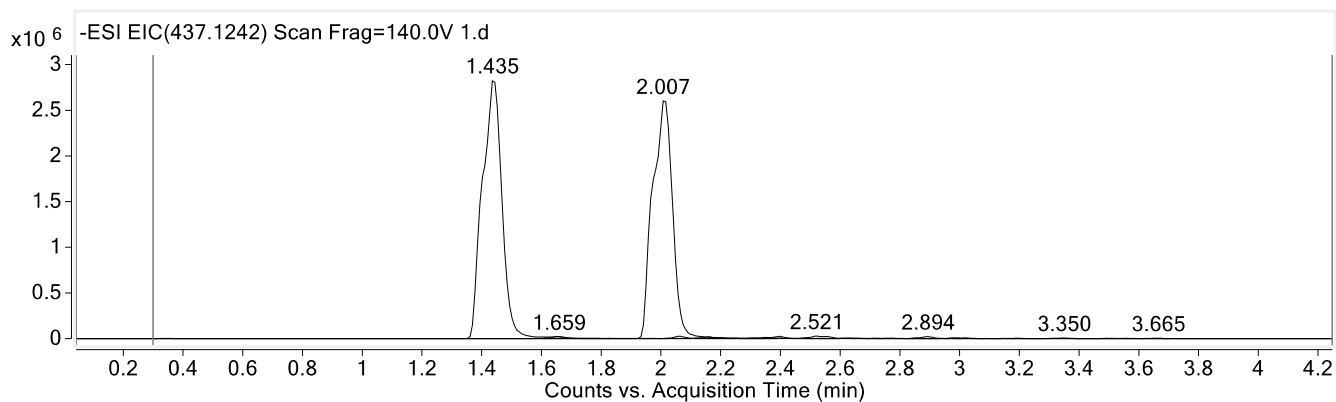

**Supplemental Figure S21.** Oxidative cross-coupling of **10** and **31** by Fe(TPP)Cl (Supplemental Table S1, Entry 2d).

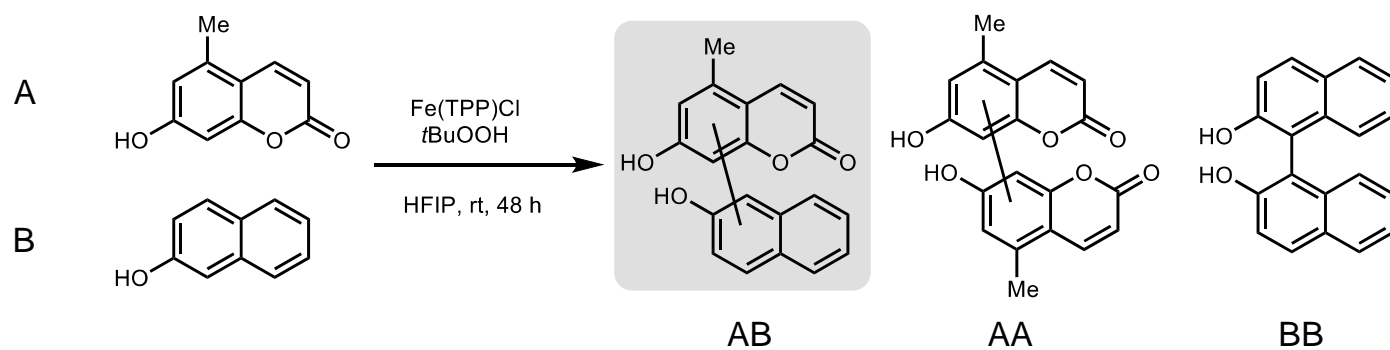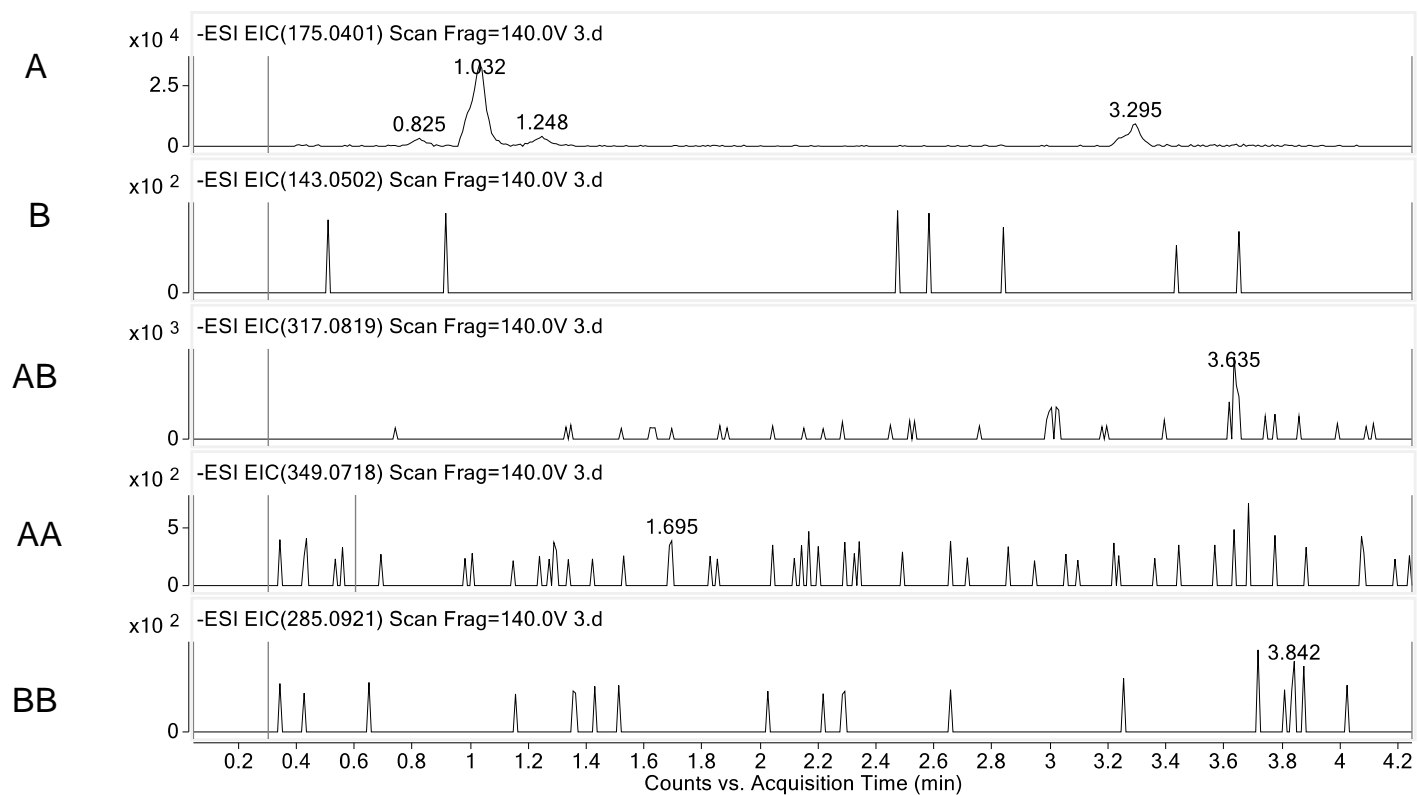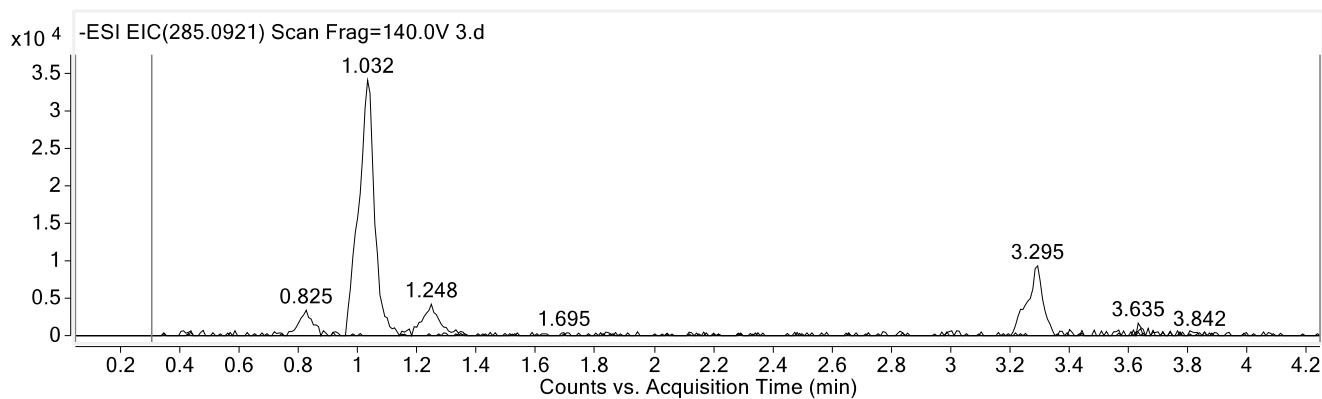

**Supplemental Figure S22.** Oxidative cross-coupling of **31** and **39** by Fe(TPP)Cl (**Supplemental Table S1, Entry 3d**).

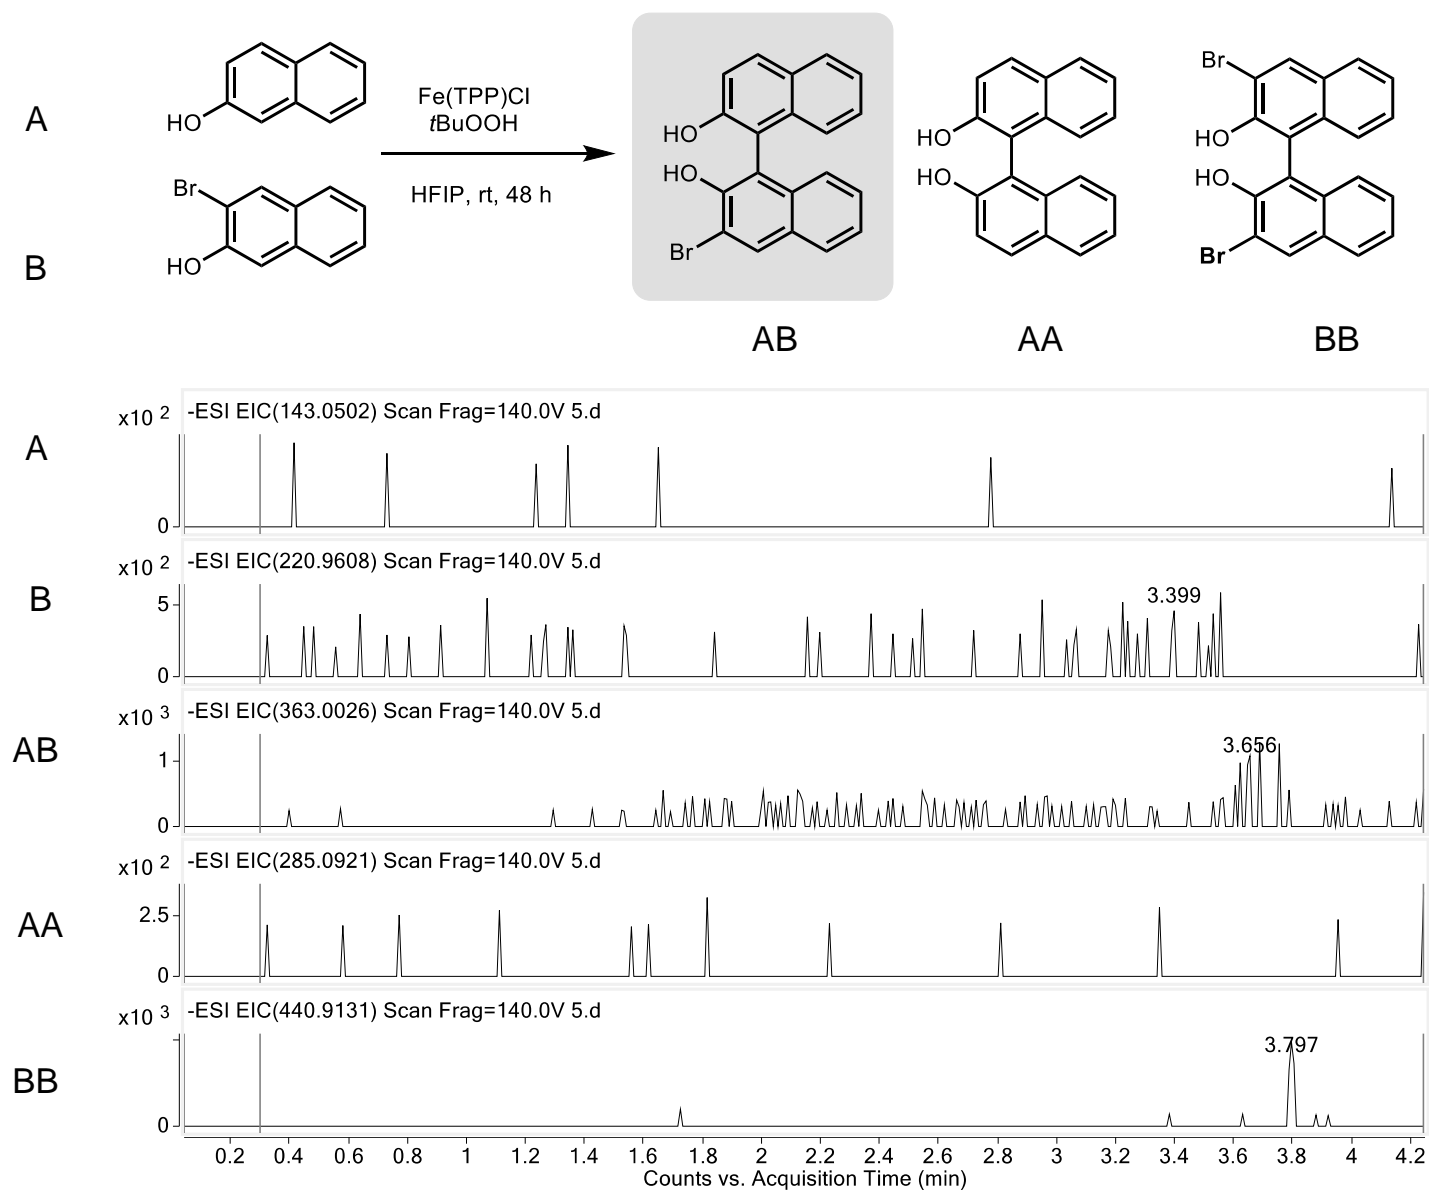

**Supplemental Figure S23.** Oxidative cross-coupling of **4** and **18** by Cr-Salen-Cy (Supplemental Table S1, Entry 1e).

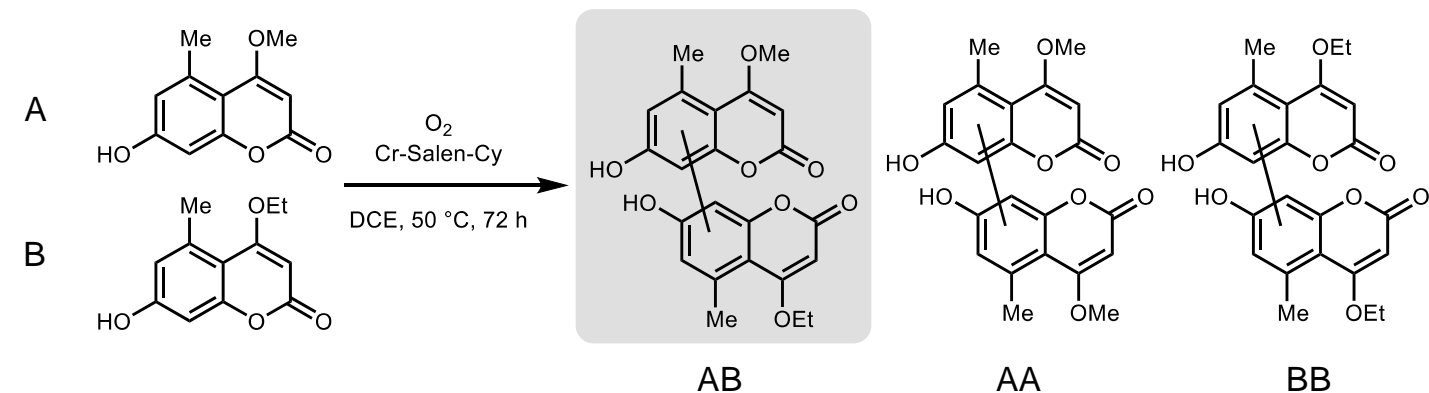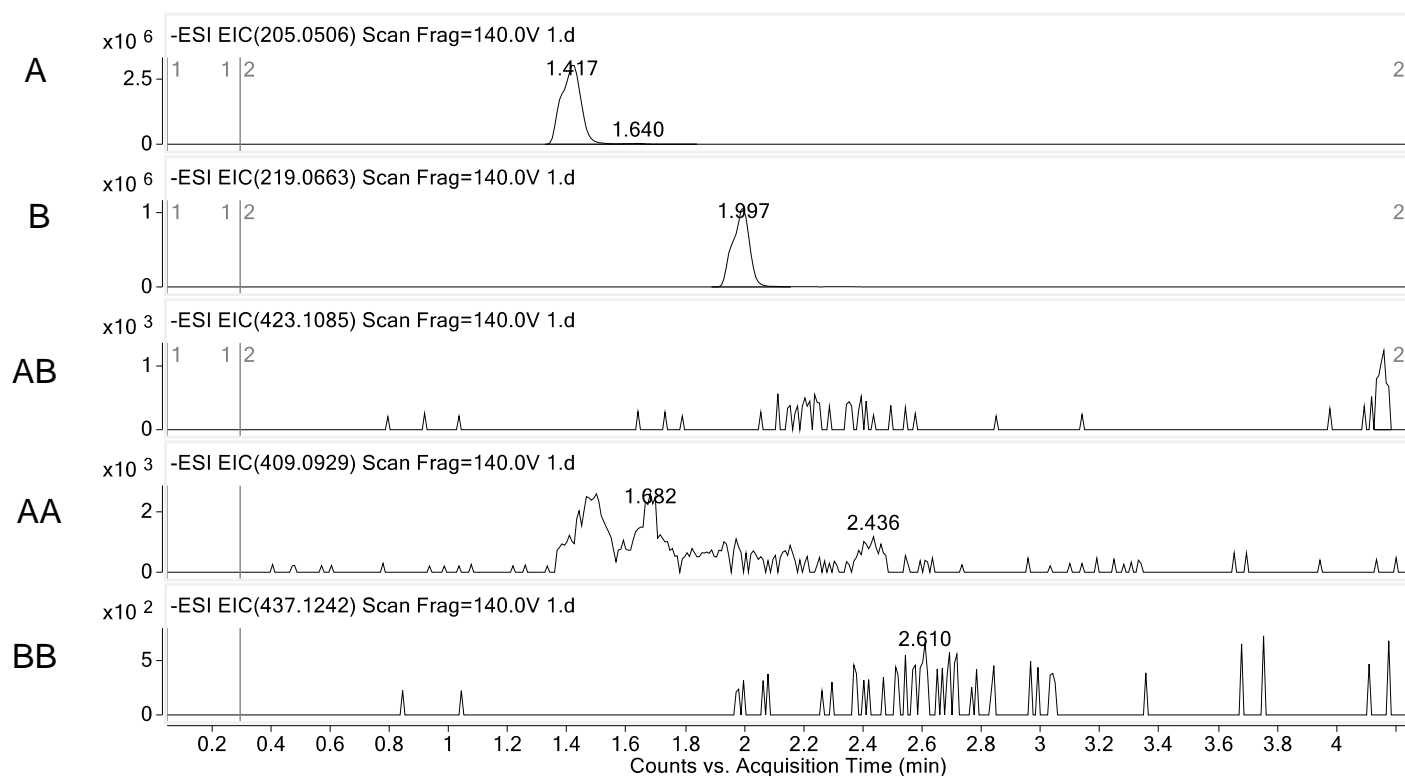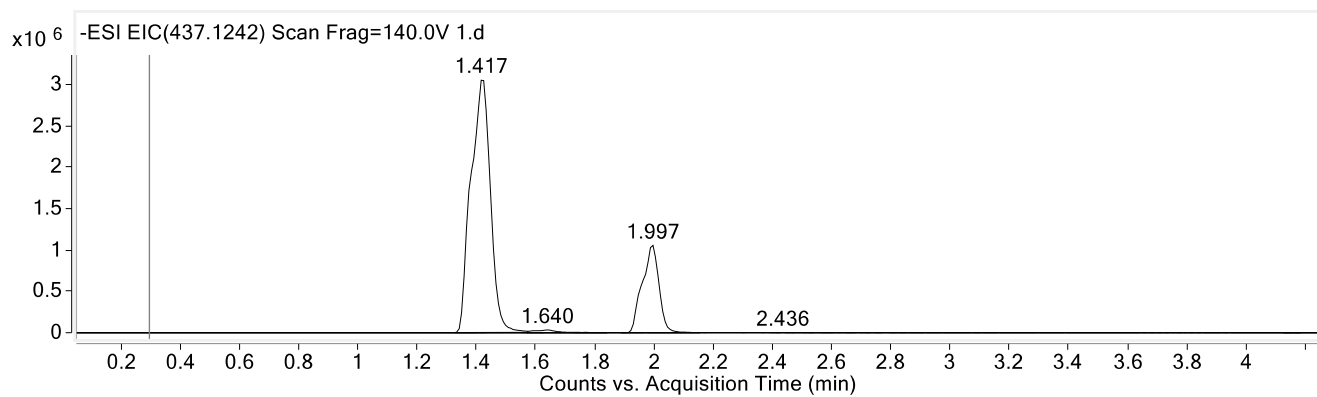

**Supplemental Figure S24.** Oxidative cross-coupling of **10** and **31** by Cr-Salen-Cy (**Supplemental Table S1, Entry 2e**).

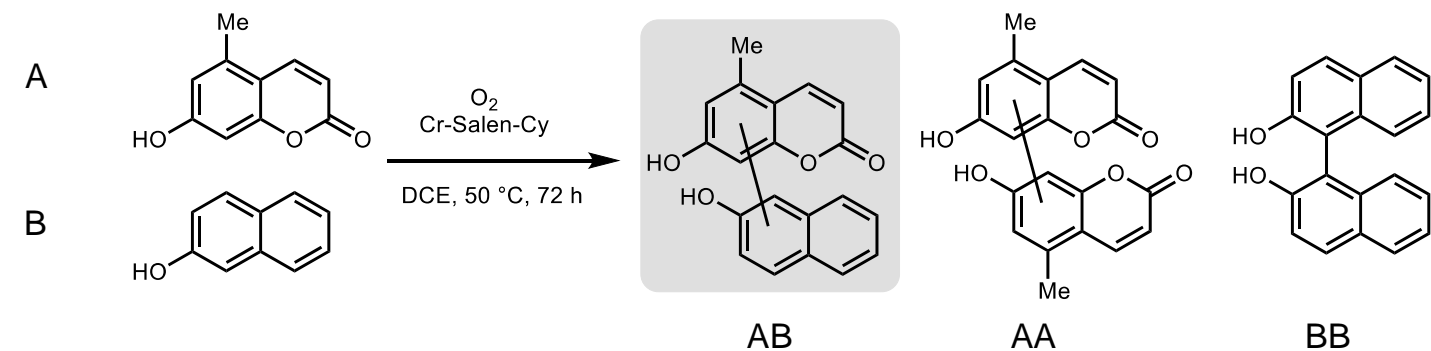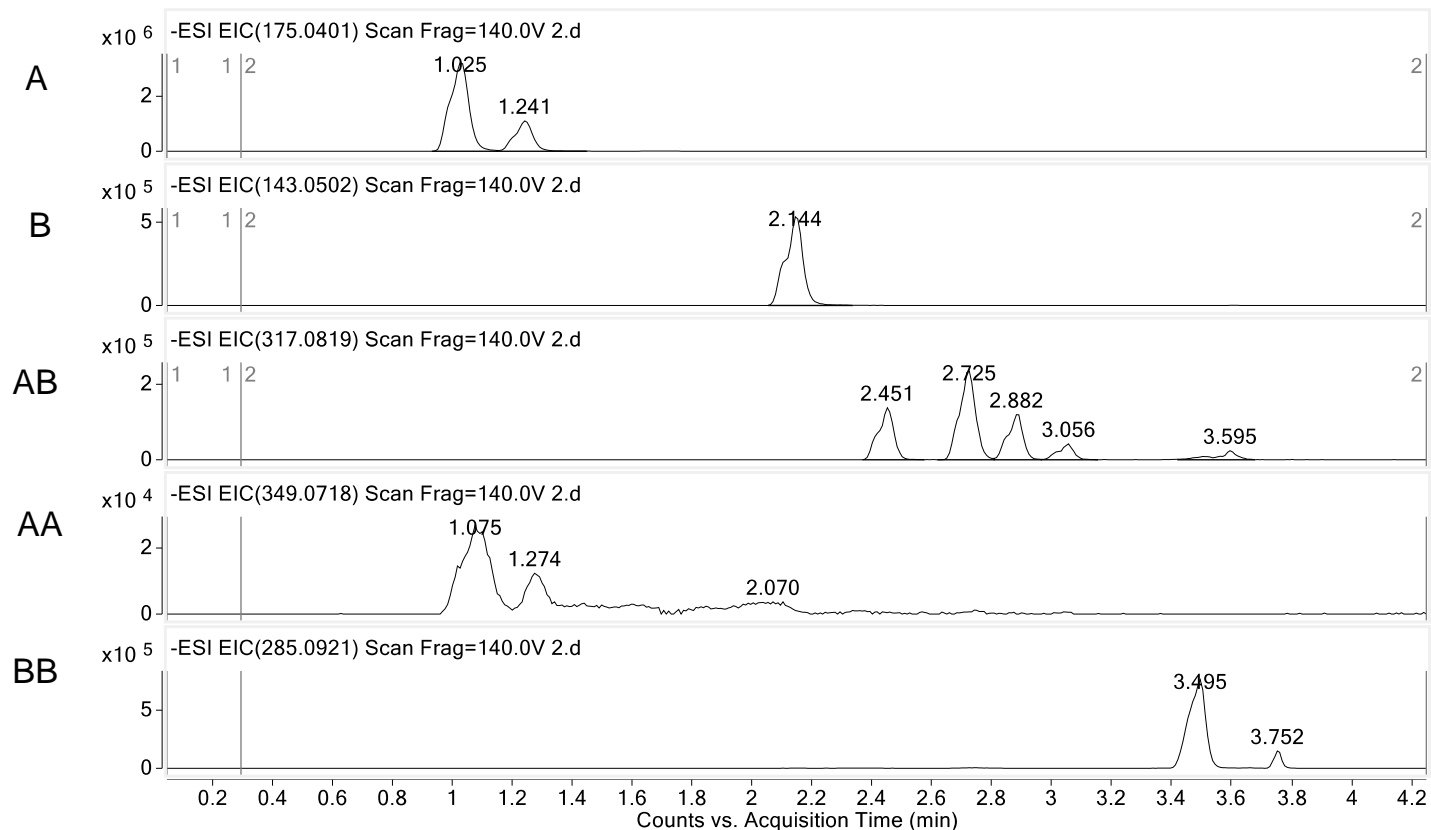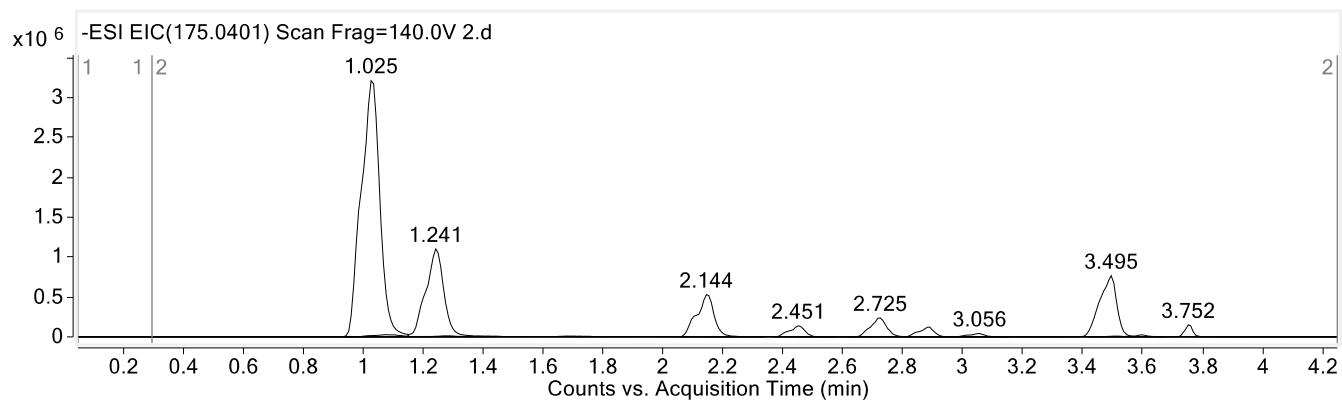

**Supplemental Figure S25.** Oxidative cross-coupling of **31** and **39** by Cr-Salen-Cy (**Supplemental Table S1, Entry 3e**).

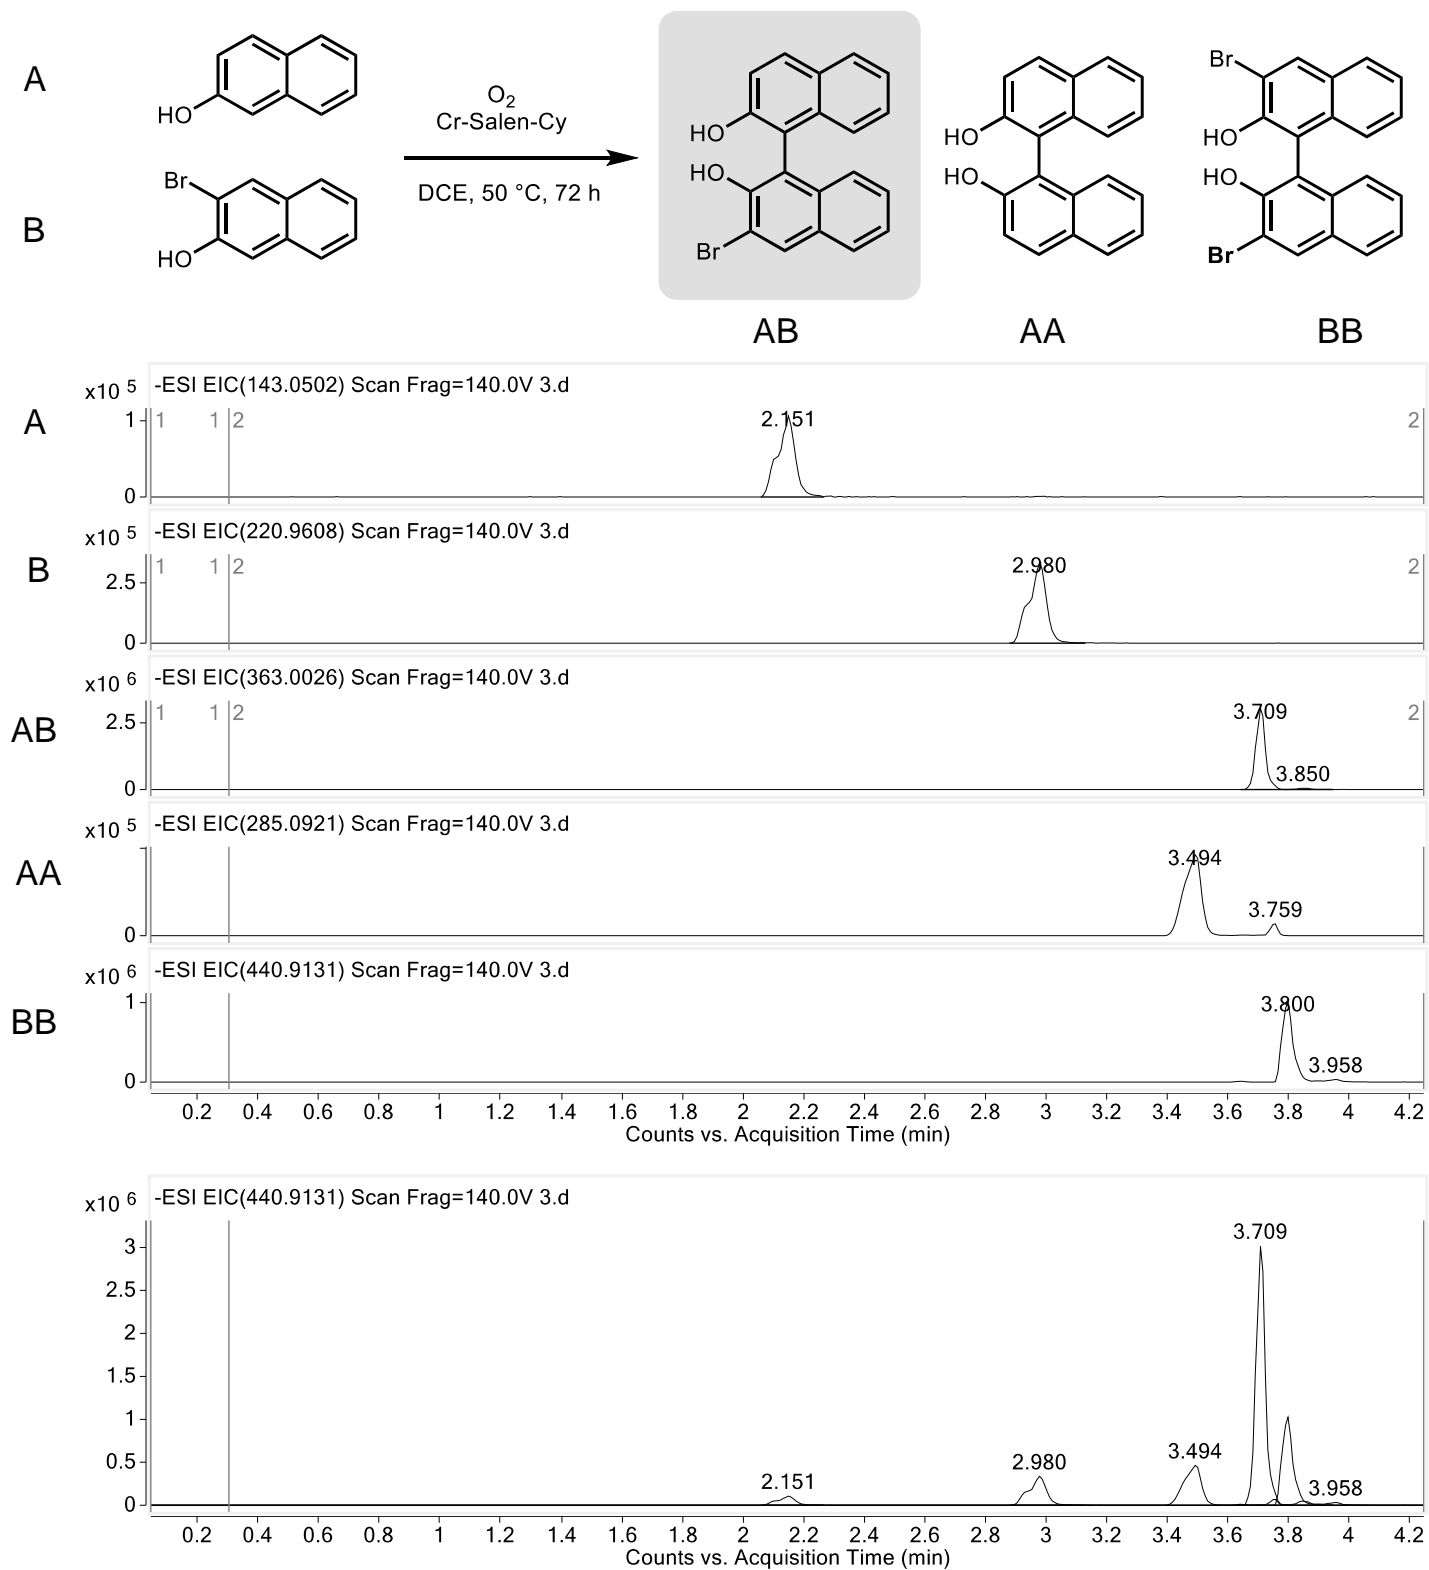



## II. Protein sequences, expression, and purification

### Bioinformatic analysis of natural P450 sequence space

**Supplemental Table S2.** Natural copper- and iron-containing enzymes that have been identified to catalyze intermolecular oxidative coupling reactions in the biosynthesis of biaryl natural products. (\*denotes hypothetical protein)

| Enzyme            | Enzyme class                             | Organism                  | Biosynthetic pathway          | Reference                              |
|-------------------|------------------------------------------|---------------------------|-------------------------------|----------------------------------------|
| laccase/<br>GhDIR | laccase/<br>dirigent protein             | <i>G. hirsutum</i>        | (+)-gossypol                  | Schaller and coworkers <sup>28</sup>   |
| VdtB/<br>VdtD     | multicopper oxidase/<br>dirigent protein | <i>A. nidulans</i>        | viriditoxin                   | Chooi and coworkers <sup>29</sup>      |
| AshL              | laccase                                  | <i>A. paraphysata</i>     | ( <i>P</i> )-chaetochromin A  | Müller and coworkers <sup>30</sup>     |
| CheL              | laccase                                  | <i>C. olivicolor</i>      | ( <i>P</i> )-chaetochromin A  |                                        |
| MytL              | laccase                                  | <i>T. thermophila</i>     | ( <i>P</i> )-chaetochromin A  |                                        |
| UstL              | laccase                                  | <i>U. virens</i>          | ( <i>M</i> )-ustilaginoidin A |                                        |
| KtnC              | cytochrome P450                          | <i>A. niger</i>           | ( <i>P</i> )-kotanin          | Müller and coworkers <sup>2,31</sup>   |
| DesC              | cytochrome P450                          | <i>A. desertorum</i>      | ( <i>M</i> )-desertorin C     |                                        |
| BicC*             | cytochrome P450                          | <i>A. alliaceus</i>       | bicoumarin (6,6')             |                                        |
| AfvE*             | cytochrome P450                          | <i>A. flavus</i>          | bicoumarin (3,8')             |                                        |
| AunB              | cytochrome P450                          | <i>A. niger</i>           | aurasperone A                 | Müller and coworkers <sup>32</sup>     |
| BfoB              | cytochrome P450                          | <i>A. brasiliensis</i>    | nigerone                      |                                        |
| ShwC              | cytochrome P450                          | <i>X. schweinitzii</i>    | alloschweinitzin              | Müller and coworkers <sup>33</sup>     |
| ClaM              | cytochrome P450                          | <i>C. fulvum</i>          | cladofulvin                   | Collemare and coworkers <sup>34</sup>  |
| NsrP              | cytochrome P450                          | <i>A. novofumigatus</i> , | neosartorin                   | Larsen and coworkers <sup>35</sup>     |
| Jull              | cytochrome P450                          | <i>S. afghaniensis</i>    | julichrome                    | Müller and coworkers <sup>36</sup>     |
| SetI*             | cytochrome P450                          | <i>S. aurantiacus</i>     | setomimycin                   |                                        |
| SptI*             | cytochrome P450                          | <i>S. spectabilis</i>     | spectomycin                   |                                        |
| P450mel           | cytochrome P450                          | <i>S. griseus</i>         | melanin                       | Horinouchi and coworkers <sup>37</sup> |
| CYP158A1          | cytochrome P450                          | <i>S. coelicolor</i>      | biflaviolin (3,3')            | Zhao and coworkers <sup>38</sup>       |
| CYP158A2          | cytochrome P450                          | <i>S. coelicolor</i>      | biflaviolin (3,8')            | Zhao and coworkers <sup>39</sup>       |
| CYP158A3          | cytochrome P450                          | <i>S. avermitilis</i>     | biflaviolin                   | Kim and coworkers <sup>40</sup>        |

**Supplemental Figure S26.** SSN visualizing sequences from the entire P450 family (PF00067) with clusters containing P450s known to catalyze intermolecular oxidative coupling reactions highlighted in red. Datasets were generated through EFI-EST<sup>41-43</sup> and visualized using the Cytoscape software.<sup>44</sup> SSN parameters: E-value of 100, minimum sequence length of 300 residues, and an alignment score of 88.

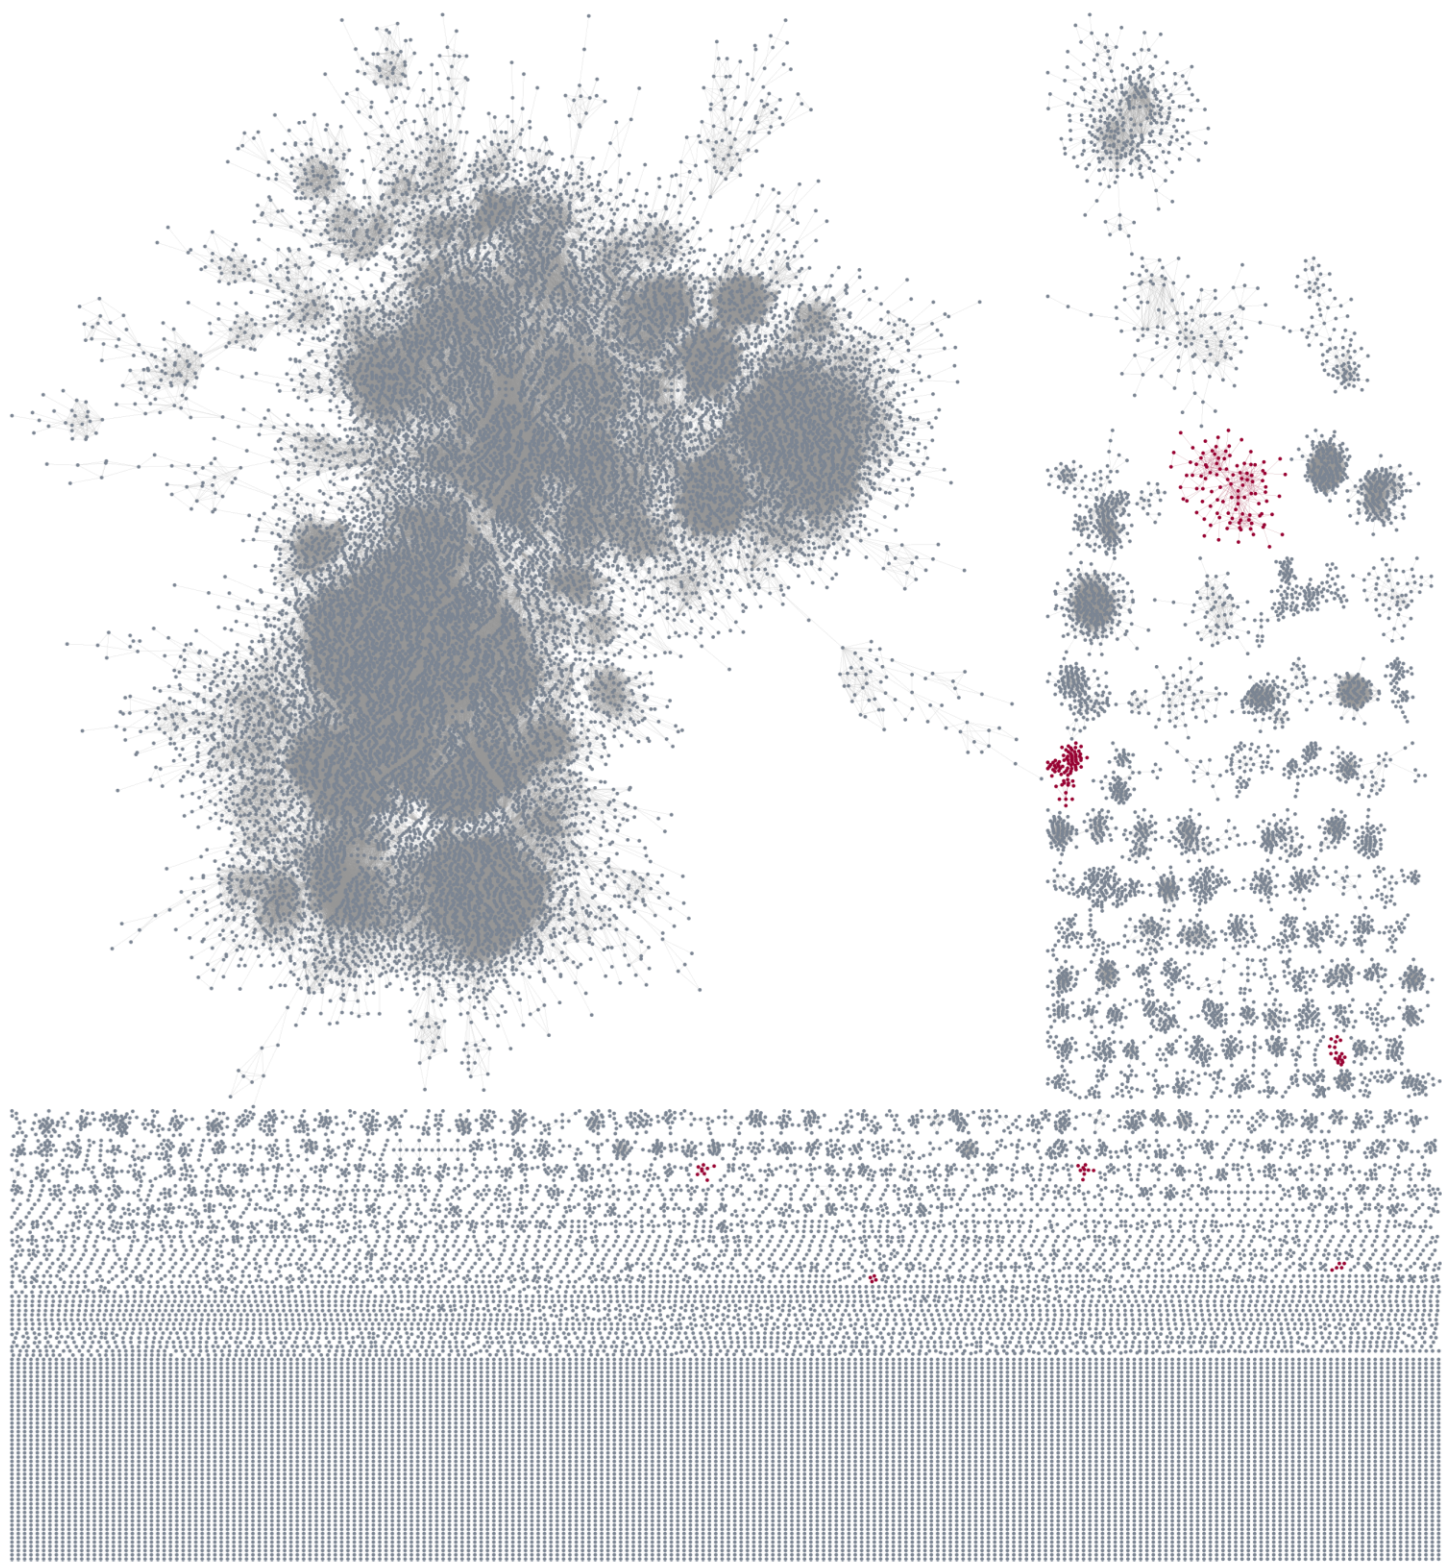

**Supplemental Figure S27.** SSN visualizing P450 sequences that cluster with P450s known to catalyze intermolecular oxidative coupling reactions (highlighted with dark blue nodes). Shared natural substrates of the known P450s in each clusters are shown. Datasets were generated through EFI-EST<sup>41-43</sup> and visualized using the Cytoscape software.<sup>44</sup> SSN parameters: E-value of 106, minimum sequence length of 300 residues, and an alignment score of 95.

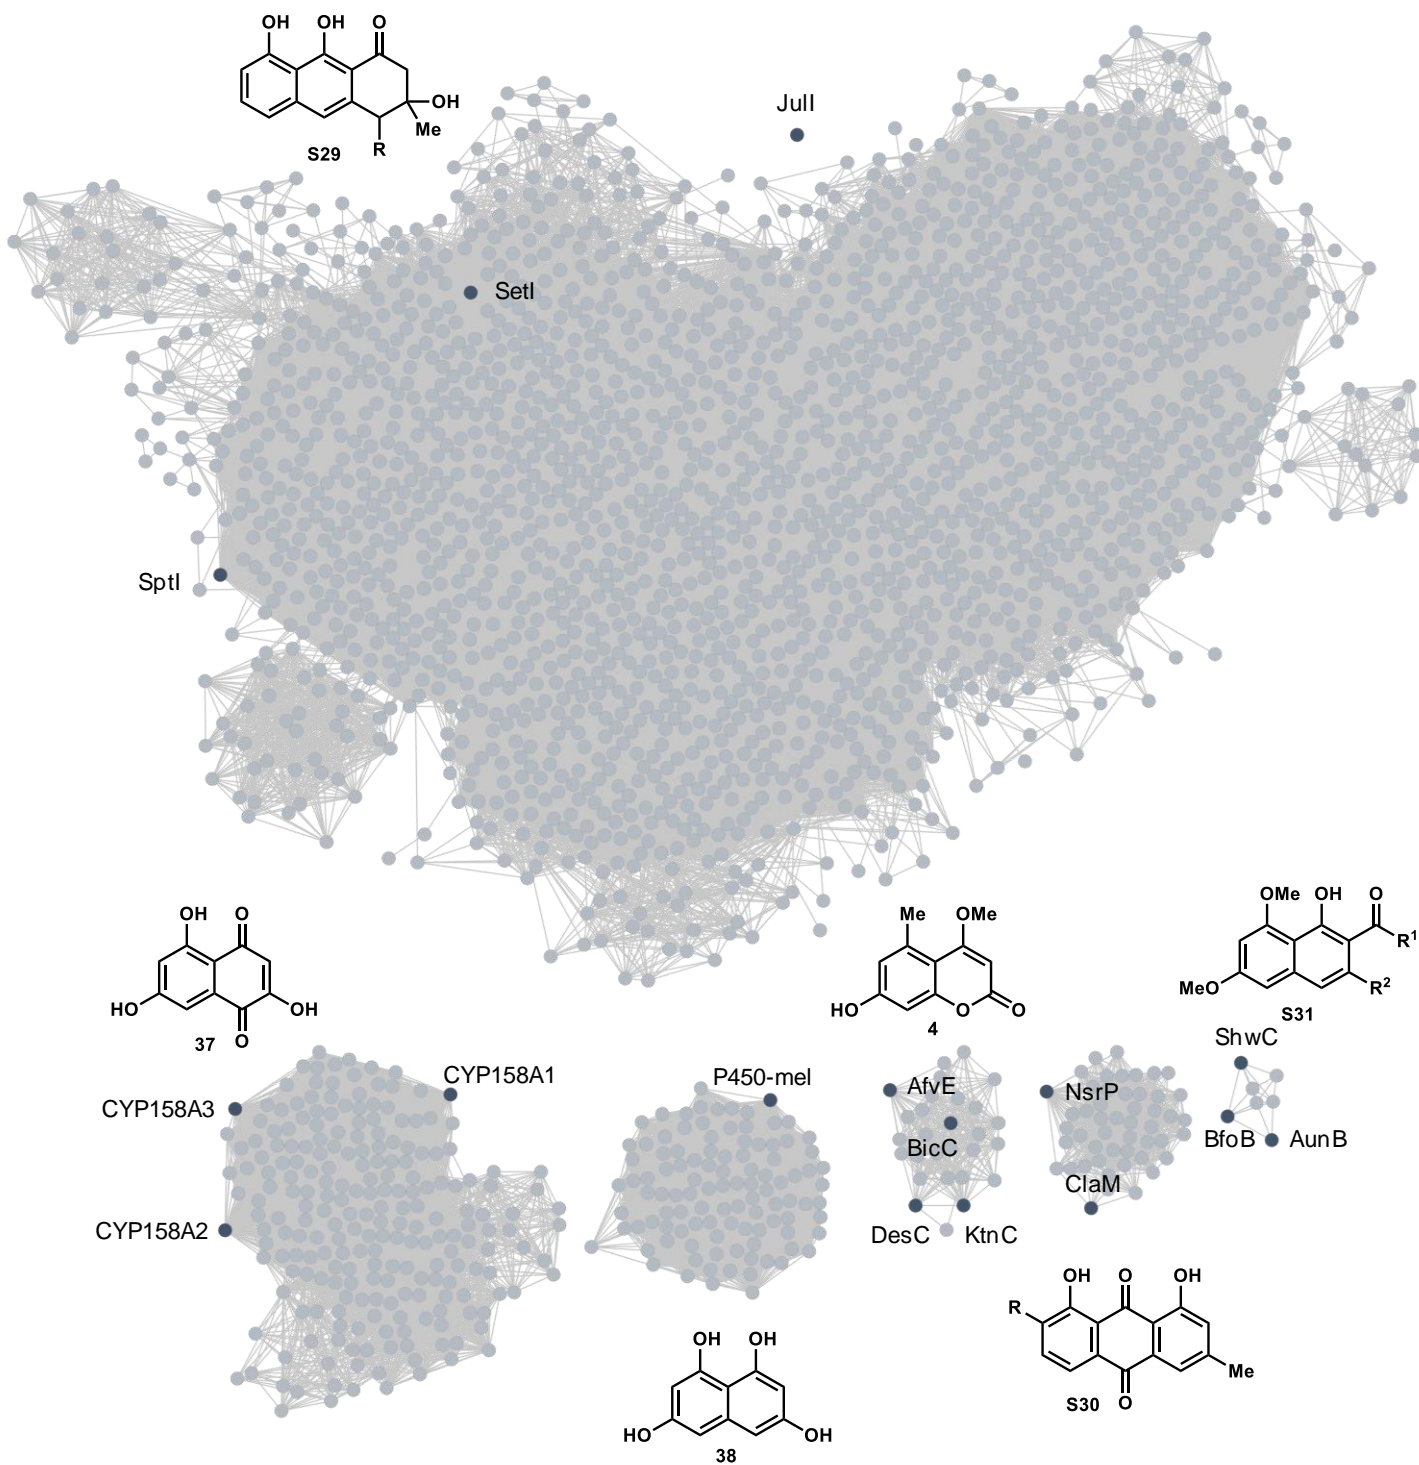

## Plasmids and sequences

The gene encoding KtnC (A2QK67.1) in a pJET1.2 cloning plasmid and a pESC-HIS expression plasmid were generous gifts from Professor Michael Müller's lab at the Albert-Ludwigs-Universität Freiburg. *KtnC* was amplified and cloned into a pPIC3.5 plasmid (Invitrogen) for functional expression in *P. pastoris*. The gene encoding CYP158A2 (Q9FCA6.1) in a pET28a(+) vector was codon-optimized for expression in *E. coli* and purchased from Twist Bioscience. The gene encoding the P450<sub>RhF</sub> reductase domain (RhFRed) in pET28b vectors were generous gifts from Professor David Sherman's lab at the University of Michigan. The codon-optimized genes encoding A0A1J4PSC8 and A0A6B3DVM9 in a pET28b vector harboring the RhFRed domain were purchased from Twist Bioscience.

### **KtnC sequences**

```
ATGGCAGTTCATGTACCATTCAGCATCCACCACGTCGTGGATATCGGCATTTCCACC GGCCCGGTAGTCATTGTCCCTCGTT
CTCCTATTCGGGTGGCTGTCTGGGATCCGACAGCCTTGATGGATGGTGGCAGAAAAGAGCCTTGAGAGGCATTCCGATT
GTAGACGAGGGTAGCTACATGCGGCCAAAGCTACGATGGAAGCGCTTCGATGCGGAGAAAGAGTATGCGAGAGCATA TCAG
CAGTACACAAAAGCAGGGAAA CCTTATGC GATCGGATGCA GAATGATAATTA TGGCATTGTGCT TCCCTTAAACTCAGCA
AAGGAATGGAGGTTCTTACCACACGACCAGCTGAGCTTTCTTCAAGCCTTGGCAGAGTTTGCGGATATGAACATGTACTGC
GACGTACGGACAGGACACCCATTGAAGCTGTT CATAGTTGCAACAACGCTGAATCA TTAACATCCTCAATAAGCTTCTC
GCCCCGGAAACCGATACAGCC TTATCTCAGATT TTCGAGCAGCCTACAGGAAAAGAC TGAAGGAATTGAACACACTGCAG
ACAATCCTCTCCTTATGCTCAACGGTTACTATGGCCTTGCTCCTCGGACCAGATACAGCCCCTGACCCGGTGTCCACCAC
CATTGACGTCTTTTGGCGAAGCAAT TATGAGCAGTTGTTATCGACGAACGGGATATCCGCGCATCCTGCGGCCATTCTGTG
TGGCGTTTTTCGTCCGAATGCGAAATCTGAGGAAACACTTATCTCTCGTGAGAGAGAGACTTGTTCCTGAGGTTGCGCGC
CGTGTGCGAGCTGCACGAGCGGCGGATAAAACCAAGGACGTACGCCCATCTTCATTGTTGGACGCACTGATCGCGCGGCC
TTCGACAACGGCAGCTTAAGCCAGATGACCAAGGCAGAAATGATGCAGCACAGGTACAGTTGCTGGCAGATGATCTCATT
TTCTACCATTTCGAACTCTGTAAACCGACCGCATTCAACATCATCTTCCAGCTGTATGCCATCATGGACCACCCAGAGTAC
AAGGCTCCTCTCCGAGAGGAGGCAC TCCAAGCCTTGAAGCTCACCAATGGTGA CTGGACCGTTGAAACTCTGAAGCAGCT
CCCAAGTTAGAAA GCTTTACA AAGGAGACCTTTGAC TGTACGATATCTCCGGTTTTGT CAGCTTCGCCGTGTCATGAAA
CCTCTTACTCTAAACTCCATCGGCC TGCTCTTTCGTC CCGGTACAATCTTATTGTCTCCATGTCG GAATGTCCATTTGGAT
CCCGAGATCTATGAAGACCCGACAAC TTTCAATGGCTACCGCTTC TACGACTCCAGCCGCGAGGTCTGCTCTCCACGCGTG
GCAACCACCTCGCTCACGTTCTTGACATTTTCTCATGGAGCGGGCAGCTGTCCCGCGCGGGTTCTCGCTACTCAAATTTGT
CGGACGATCTTCATCAAGTTCTGTGTG CAGTACGACGTAGAACCTGTGCAGAA GGAGATACTACCCTATGGATTACCAAGT
GGTCCGGTCTATATGCC TAATCCATCAGT GATGATGAGAATCCGGCCAAGAAGTGACGGGAAG
```

```
MAVHVPFSIHHVVDIGISTGPVVIVLVLLFGLAVVGS DSLDGWWQKRALRGIP IVDEGSYMRPKLRWKR FDAEKEYARAYQ
QYTKAGKPYAIRMQNDNYGIVLPLNSAKEWRSLPHDQLSFLQALAEFADNMNYCDVTDRTP IEAVHSCNNAESLNILNKLL
ARETDALSQIFEQPTGKDWKELNTLQTI LSLCSTVTMALLLGPDTAPDPVLHHHSTSFGEAIMSSCYRRTGYPRILRPFV
WRFSSSECRNLKRKHLSLVRERLVPEVARRVAAARAADKTKDVRPSSLLDALIAAAFNDNGSLS PDDQGRNDAAQVQLLADDLI
FYHFE LCKPTAFNIIIFQLYAIMDHPEYKAPLREALQALKL TNGDWTVE TLKHAPKLESFTKETFRLYDISGFVSFRVMK
PLTLNSIGLSLRPGTILLSPCRNVHLDPEIYEDPTTFNGYRFYDS SREVCSPRVATTSLTFLTFSHGAGSCPARVLA TQIC
RTIFIKFLLQYDVEPVQKEILPYGFTSGPVYMPNPSVMMRI RPRSDGK
```

### **CYP158A2 sequences**

```
ATGACTGAAGAGACAATATCACAAGCTGTACCGCCTGTTTCGCGACTGGCCGGCTGTGGACCTGCCGGGTTCGACTTCGAC
CCGGTTTTGACCGAGCTGATGCGTGAGGGTCCAGTGACTCGTATCAGTCTGCCGAATGGTGAA GGTGGGCTTGGTTGGTG
ACTCGTCACGATGATGTTTCGCTAGTGACCAATGATCGCGTTTTTGGCCGCGAGGGCGGTTATGGACCGTCAAGTTACGCGT
TTGGCGCCTCACTTTATCCCGGCGGTGGCGCGGTAGGCTTCTTGACCCGCCGGATCACACCCGTTTGGCGCGTAGCGTT
GCGGCGGCGTTTTACCGCACGTGGCGTGGAGCGTGTTCGTGAGCGCTCCC GCGGTATGCTGGACGAACTGGTTCGACGCCATG
CTACGCGCGGGTCCGCCAGCCGATCTGACCGAAGCCGTGCTGAGCCGTTCCC GATTGCAGTTATTTGTGAAC TTATGGGT
GTTCCGGCAACCGATCGTACAGCATGCATACCTGGACCCAGCTGATTC TGCTAGCAGCCATGGCGCGGAGGTGAGCGAG
CGCGCGAAAACGAAATGAACGCCTACTTCTCCGACTTGAT TGGCTTAA GATCGGACTCTGCAGGCGAGGACGTGACGAGC
CTGCTGGGCGCCGCTGTGGGTGCTGACGAGATCACCC TGCTTGAGGCTGTGCGTTTGGCGGTTCTGTTGCAAA TTGGCGGT
GAGGCCGTGACGAACAACAGCGGTCAGATGTTTCATCTGCTGCTT TCCAGGCCCGAACTGGCGGAAAGACTGCCTCGGAA
CCGGAGATCCGTCGCGTGCGATCGATGAGTTACTGCGTTGATTCCGCACCGTAATGCTGTCGGACTGAGCCGTATCGCG
TTGGAAGATGTGGAGATTAAGGGCGTACGTATC CGGGCGGGTGTATGCAGTGTACGTGAGCTATCTGGCTGCGAACCGTGAC
```

CCGGAGGTTTTTCGGACCCGGACCGCATCGATTTTGAAGATCACCGAACCCGCATGTTTCTTTGGTTTCGGCCCGCAC  
TATTGCCCGGGCGGCATGCTCGCCGTCTCGAAAGCGAATTGTTGGTTGACGCGGTA CTGGACCGCTGCCGGGTCTTAAG  
CTGGCAGTTGCTCCGGAAGATGTTCCGTTCAAAAAGGGTGCCTGATCCGTGGTCCGGAAGCGCTGCCGGTCACTGG

MTEETISQAVPPVRDWPVAVDLPGSDFDPVLTELMREGPVTRISLPNNGEGWAWLVTRHDDVRLVTNDPRFGREAVMDRQVTR  
LAPHFIPARGAVGFLDPDHTRLRRSVAAFTARGVERVREERSRGMLELVDAMLRA GPPADL TEAVLS PFPIAVICELMG  
VPATDRHSMHTWTQLILSSSHGAEVSEKAKNEMNAYFSDLI GLRSDSAGEDVT SLLGAAVGRDEI TLSEAVGLAVLLQIGG  
EAVTNNSGQMFHL LLSRPELAERLRSEPEIRPRAIDELLRWIPHRNAVGLSRI ALEDVEIKGVRI RAGDAVYVSYLAANRD  
PEVFPDPDRIDFERSPNPHVSFGFGPHYCPGMLARLESELLVDAVLDRVPGLKLAVAPEDVVPFKK GALIRGPEALPVTW

## A2-RhFRed sequences

ATGACTGAAGAGACAATATCACAAGCTGTACCGCCTGTTCCGAC TGGCCGGCTGTGGACCTGCCGGGTTCGACTTCGAC  
CCGGTTTTGACCGAGCTGATGCGTGAGGGTCCAGTGACTCGTATCAGTCTGCCGAATGGTGAAGGTTGGGCTTGGTTGGTG  
ACTCGTCACGATGATGTTCCGCTAGTGACCAATGATCCGCGTTTTGGCCGCGAGGGCGTTATGGACCGTCAAGTTACGCGT  
TTGGCGCCTCACTTTATCCCGGCGCTGGCGCGGTAGGCTTCTGGACCCGCCGGATCACACCGTTTTGCGGCGTAGCGTT  
GCGGC GGCGTTTTACCGCACGTGGCGTGGAGCGTGTTCGTGAGCGCTCCC GCGGTATGCTGGACGAACTGGTCGACGCCATG  
CTACGCGCGGGTCCGCCAGCCGATCGACCGAAGCCGTGCTGAGCCGT TCCC GATTGCAGTTATTTGTGAAC TTATGGGT  
GTTCCGGCAACCGATCGTCACAGCATGCATACCTGGACCCAGCTGATTCGTCTAGCAGCCATGGCGCGGAGGTGAGCGAG  
CGCGCGAAAACGAAATGAACGCCTACTTCTCCGACTTGAT TGGCTTAA GATCGGACTCTGCAGGCGAGGACGTGACGAGC  
CTGCTGGGCGCCGCTGTGGGTGCTGACGAGATCACCCGTCTGAGGCTGTCCGTTTGGCGGTTCTGTTGCAAA TTGGCGGT  
GAGGCCGTGACGAACAACAGCGGTGAGATGTTTCATCTGCTGCTTCCAGGCCCGAACTGGCGGAAAGACTGCCTCGGAA  
CCGGAGATCCGTCGCGTGCGATCGATGATTA CTGCGTTGGATTCCGCACCGTAATGCTGTCGGACTGAGCCGTATCGCG  
TTGGAAGATGTGGAGATTAAGGGCGTACGTATCCGGCGGGTGTATGCAGTGTA CGTGAGCTATCTGGCTGCGAACCGTGAC  
CCGGAGGTTTTTCGGACCCGGACCGCATCGATTTTGAAGATCACCGAACCCGCATGTTTCTTTGGTTTCGGCCCGCAC  
TATTGCCCGGGCGGCATGCTCGCCGTCTCGAAAGCGAATTGTTGGTTGACGCGGTA CTGGACCGCTGCCGGGTCTTAAG  
CTGGCAGTTGCTCCGGAAGATGTTCCGTTCAAAAAGGGTGCCTGATCCGTGGTCCGGAAGCGCTGCCGGTCACTGGGAA  
TTCGTGCTGCACCGGCATCAACCGGTCACCATCGGAGAACC CGCCGCCGGCGGTGTCGCCACCGTCAACCGTCGAGCGC  
CTGGACCGGATCGCCGACGACGTGCTGCGCCTCGTCC TCGCGACGCCGCGGAAAGACAT TACC CACGTGGACTCCCGGC  
GCCCATATCGACCTCGACCTCGGCGCGTGTGCGCGCCAGTACTCCCTGTGCGGCGCGCCGATGCGCCGAGCTACGAGATT  
GCCGTGCACCTGGATCCCGAGAGCCGCGCGGTTGCGGCTACATC CACGAACAGCTCGAGGTGGGAAGCCCGCTCCGGATG  
CGCGGCCCTCGGAACCA TTTGCGCTCGACCCCGCGCCGAGCAC TACGTGTTGTCGCCGGCGGCATCGGCATCACCCCA  
GTCCTGGCCATGGCCGACCACGCCCGCGCCGGGGGTGGAGCTACGAAC TGCACTAC TCGCGCCGAAACCGTTCCGGCATG  
GCCTATCTCGAGCGTGTGCGCGGCACGGTGACCGGGCCGCCTGCACGTGTC CGAGGAAGGCACCGGATCGACCTCGCC  
GCCCTCTCGCCGAGCCCGCCCGCGGTCCAGATCTACGCGTGC GGGC CCGGCGGCTGCTCGCCGACTCGAGGACGCG  
AGCCGGAAC TGGCCCGACGGGGCGCTGCACGTCGAGCACTT CACC TCGTCCCTCGCGCGCTCGATCCGGACGTCGAGCAC  
GCCTTCGACCTCGAACTGCGT GACTCGGGGCTGACCGTGCGGGTCAACCCACCCAGACCGTCTCTCGACGCGTTCGCGGCC  
AACAAATCGACGTGCCAGCGACTGCGAGGAA GGCC TCTGCGGCTCGTGCAGGTCGCCGTCTCTCGACGGCGAGGTGAC  
CATCGGACACGGTGCTGACCAAGGCCGAGCGGGCGGCGAA CCGGCAGATGATGACC TGCTGCTCGCTGCCTGTGGCGAC  
CGGCTGGCCCTGCGCCTCTGA

MTEETISQAVPPVRDWPVAVDLPGSDFDPVLTELMREGPVTRISLPNNGEGWAWLVTRHDDVRLVTNDPRFGREAVMDRQVTR  
LAPHFIPARGAVGFLDPDHTRLRRSVAAFTARGVERVREERSRGMLELVDAMLRA GPPADL TEAVLS PFPIAVICELMG  
VPATDRHSMHTWTQLILSSSHGAEVSEKAKNEMNAYFSDLI GLRSDSAGEDVT SLLGAAVGRDEI TLSEAVGLAVLLQIGG  
EAVTNNSGQMFHL LLSRPELAERLRSEPEIRPRAIDELLRWIPHRNAVGLSRI ALEDVEIKGVRI RAGDAVYVSYLAANRD  
PEVFPDPDRIDFERSPNPHVSFGFGPHYCPGMLARLESELLVDAVLDRVPGLKLAVAPEDVVPFKK GALIRGPEALPVTWE  
FVLHRHQPV TIGE PAARAVSRTVTVERLDRIADDVLR LVL RDAGGKTLPTWTPGAHI DLDL GALS RQYSLCGAPDAPSYEI  
AVHLD PESRGGSR YIHE QLEVGSP LMRGPRNFALDPGAEHYV FVAGGIGITPVLAMADHARARGWSYELHYCGRNRS GM  
AYLERVAGHGDRALHVSEEGTRIDL AALLAEPAPGVQIYACGPGRLLAGLEDASRNWPDGALHVEHFTSSLAALDPDVEH  
AFDLELRDSGLTVRVEPTQTVLDALRANNIDVPSDCEEGLCGSCEVAVLDGEVDHRD TVLTKAERAANRQMMTCCSRACGD  
RLALRL

## A0A1J4PSC8-RhFRed sequences

ATGACAACACTAGAAACTTCAGCTCCACGGGCCAAGAACC GCCACCGGTGCGTGACTGGCCTGCTCTGGACCTGGATGGC  
ACCGAATTTGATCCGGTGCTGGCGGGTCTGGTTCTGTAAGGCCCGCTGACCCGCATCCGCTTACCGTTCCGGCGAGGGTGG

GCCTGGCTGGCCAACCGTTATGAGCATGTGAAGCTGATTACGAACGATCCGCGTTTTAGCCGTGCGGCAGTGGCGCGCGGT  
CAAGTACGCGCTTGGCGCCAACTTTGCACCGCGTCGGGCAGCCTGGCGTGGCAGATCAGCCGGACCACAACCGTCTG  
CGCAAGCCGTTTGGCGGCGCTTACCGTTGGTGTATGAAACGTCTGCGTCCGCGTGCCAGGAGATCCTGGATGAGTTG  
GTTGACGCTCTGGTGACGAAAGGTCACCCGGCTGATCTGGTAGAGCGTGTGGTGGAGCCGTTCCGTTGTACGTTGTGAGC  
GAAGTATGGGTGTGCCGGACACTGACCGCGACCAGGTTCACTCCGGACCCGTCAAATCATCAGCCTTTGCGGTGGTGGC  
GAAGCTGCCGACCGTGCAGAAAACGGCCTGTACGGTTGGATCACCAGATAATTGTTTCGTGCGCGTGCACGGTCCGCCGGCAG  
GACGTGTACTCCATGCTGGCAGAGCGGTGGCTCGCGCGAGATTGGTGAAGAAAGAGCGGTGGGTTTGGCGGGTCCGCTG  
CAGATCGCGGTTGAGGCGGTGACGCACAACCTGCGGTCAGATGCTGTACTTAATGTTGACGCGTCCGGAGTTGATGGCACGC  
ATGCGTTCTCGTCCGACGAAAGAGGCCAGTTTCGATGAACTATTGCGTGGATCCCGCACCCTAATACCGTTGGTCTC  
GCGCGTATCGCGTGGAAAGACGTGAGATCGCGGGTCATCGTATTGCTGCGGGCGAGGCCGTGTACGTGAGCTATCTGTCT  
GCAAACTCGTATCGGAAGTGTCCCGGACCCGGACGGCATTGCTCCGGATCGCGATCCTAATCCGCACGTGGCCTTCGGA  
AACGGTTCATCATTATTGTACCGGTGCTGTACTGGCACGTCTCAAACCTGGAGTTGTTGGTTGACACCTTGCTGGACCGTCTG  
CCGGGCTTCGCTGGCGGTCACAGCAGAAGATGTTGAATGGAGACGTCAGACCATGATTAGAGGTCCGCGTACCCTGCCG  
GTTACTTGGGAATTCGTGCTGCACCGCCATCAACCGGTCACCATCGGAGAACC CGCCGCCGGGGCGGTGTCCCGCACCGTC  
ACCGTCGAGCGCTGGACCGGATCGCCGACGACGTGCTGCGCCTGTCCTGCGCGACGCCGGCGGAAAGACATTGCCACG  
TGGACTCCCGCGCCCATATCGACCTCGACCTCGGCGCGCTGTGCGCGCCAGTACTCCCTGTGCGGCGCGCCCGATGCCCG  
AGCTACGAGATTGCCGTGCACCTGGATCCCGAGAGCCGCGGCGGTTCGCGCTACATCCACGAACAGCTCGAGGTGGGAAGC  
CCGCTCCGGATGCGCGGCCCTCGGAACCATTTGCGCTCGACCCCGCGCCGAGCAC TACGTGTTGTCGCCGGCGGCATC  
GGCATCACCCAGTCCCTGGCCATGGCCGACACGCCCGCGCCGGGGGTGGAGCTACGAAC TGCACACTGCGGCCGAAAC  
CGTTCCGGCATGGCCTATCTCGAGCGTGTGCGCGGCACGGTGAACGGGCGCCCTGCACGTGTCGAGGAAGGCACCCGG  
ATCGACCTCGCCGCCCTCCTCGCCGAGCCCGCCCGGCGTCCAGATCTACGCGTGGGCGCCGGCGGGCTGCTCGCGGGA  
CTCGAGGACGCGAGCCGGAAC TGGCCGACGCGGGCGCTGCAAGTGCAGACTTCACCTCGTCCCTCGCGGCGCTCGATCCG  
GACGTGAGCAGCCTTCGACCTCGAACTGCGT GACTCGGGGCTGACCGTGCGGGTGAAACCCACCCAGACCGTCCCTCGAC  
GCGTTGCGCGCCAACAACATCGACGTGCC CAGCGACTGCGAGGAAAGCC TCTGCGCTCGT GCGAGGTCGCCGTCCTCGAC  
GGCGAGGTCGACCATCGCGACACGGTGCTGACCAAGGCCGAGCGGGCGGCGAAACCGGCAGATGATGACCTGCTGCTGCGT  
GCCTGTGGCGACCGGCTGGCCCTGCGCCTCTGA

MTTLETSAPTQEPVVRDWPALDLGTEFDPVLAGLVREGPLTRIRLPFEGGWAWLATRYEHVKLITNDPRFSRAAVARG  
QVTRLAPNFAPRPGSLAWADQPDHNRRLKPVAGAFVGMKRLRPRAQELDELDVDA LVHEGPPADLVERVLEPFPL YVVS  
EVMGVPDTRDQVHSWTRQII SLCGGAEAADRAKNGLYGWI TDIVRARARSAGEDVY SMLARAVARGEI GEEEAVGLAGPL  
QIGGEAVTHNCGQMLYLMLTRPELMARMRSRDERGPVFDELLRWI PHRNTVGLARI ALEDVEIAGHRI AAGEAVYVSYLS  
ANRDPEVFPDPDG IAPDRDPNPHVA FGNHGHYCTGAVLARLQLEL LVDL LLDRLPGLRLAV PAEDVEWRRQTMIRGPRTL  
VTWEFVLRHQPV TIGE PAARAVSR TVTVERLDRIADDVLR LVLRLDAGGKTLPTWTPGAHI DLDL GALS RQYS LCGA PDAP  
SYEIAVHLD PESRGGSR YIHEQLEVGSPLMRGPRNFALDPGA EHYV FVAGG IGT PVLAMADHARARGWSYELHYCGRN  
RSGMAYLERVAGHDRAALHV SEEGTRIDLAALAE PPGVQIYACGPGRLLAGLEDASRNWPDGALHVEHFT SSLAALDP  
DVEHAFDLELRDS GLTVRVEPTQTVLDALRANNIDVPSDCEEGLCGSCEVAVLDGEVDHRD TVLT KAERAANRQMMTCCSR  
ACGDR LALRL

### A0A6B3DVM9-RhFRed sequences

ATGGCTCCACCTCCCGAGGAAACGGCACCCCAACCGATCCGCGAT TGGGCGCTCTGGATTGGCGGGCACCGAATTTGAT  
CCGGTGTGCGTGAAC TATGCGTGACGGCCCTATCACCGTATTGAT TACCGCACGGCGAGGGTTGGCGGTGGCTGGCC  
ACCCGCTACGATGATGTGAACTGAT TACCAATGATCCGCGCTTCAGCCGTGCAGAA GTTACGAGACGCCAAGTGACGCGC  
CTCGCTCCGCACT TCAAGCCGCGTCCGGGCAGCCTGGCGTGGCGGATCAGCCGGACCACAACCGTTTGCCTAAGCCGGTG  
TCTGCAGCTTACCGTTGGT GCAATGAAACGTCTTCGTCCCGT GCTCAAGAACTATTAGACGAATGGTTGACCGCTG  
GTCCAGGCAGGCCCGCCAGCGGACCTGGT TGAACGCGTTCTGGAGCCGTTCCGATTGCGGTGGTGTCCGAGGTTATGGGT  
GTTCCGCCGGCGGACCGTGAGCAGGTGCATGCATGGACCCGTCAAATCATCAGCATG TGTGGCGGTGCGGAGGCGGCAGAC  
CGTGC TAAGCAGGGTATGTATGGTTGGATTCGTG TACCGT GAGAGAGCGCCGTGACAGCAGCGCGGAGGATGTCTTGTCA  
CTGCTGGTGCAGCGTTCGGT CGTGGCGAGATCTCGGAAGAAGAGGCGGTGGGCTGGCGGGCCACTGCAGATTGGTGGT  
GAAGCGGTGACGCATAACTGCGGTCAAATGCTGTACC TGCTGTTAACTGCCCCAGAACTGATGGCACGCATGCGTGAGCGT  
CCGGGCGAGCGCGGCCCGGTAGTTGATGAATTGCTGCGCCATATTCCGCATCGTAGCACCGTTGGTTTGGCGCGTATCGCC  
CTCGAAGATGTAGAGCTGCACGGCGTTCGTATTGCCGCTGGCGAGCCGGTCTATGTGTCTTATCTGGCTGCCAACC GCGAC  
CCGGACGTGTTCCCGGACCCGACCGTATCGACCCTGATAGAGAAACCGAGGCCGCACCTGTCTTGGTAATGGTCCGCAC  
TACTGCACCGGTGCAGTGTCTGCGCGTTTGCAGACCGAGTTGCTGATCGATACCCTGCTGGACCGCTGCCGGGTCTGCGC  
TTGGCCGATCCCCGGGT CAGGTTGCGTGGCGTTCGTC AAACCATGATCCGTGGTCCGCGTACGCTGCCGTTACTTGGGAA  
TTCGTGCTGCACCGCCATCAACCGGTCACCATCGGAGAACC CGCCGCCGGGGCGGTGTCCCGCAC CGTACCGTCGAGCGC

CTGGACCGGATCGCCGACGACGTGCTGCGCCTCGTCC TCGCGGACGCCGGCGGAAAGACATTGCCCACGTGGACTCCCGGC  
GCCCCATATCGACCTCGACCTCGGCGCGCTGTCGCGCCAGTACTCCCTGTGCGGCGCGCCCGATGCGCCGAGCTACGAGATT  
GCCGTGCACCTGGATCCCGAGAGCCGCGGCGGTTCGCGCTACATCCACGAACAGCTCGAGGTGGGAAGCCCGCTCCGGATG  
CGCGGCCCTCGGAACCAATTCGCGCTCGACCCCCGGCGCCGAGCACTACGTGTTGTCGCGCGGCGGCATCGGCATCACCCCA  
GTCCTGGCCATGGCCGACCACGCCCGCGCCCGGGGGTGGAGCTACGAAC TGCACTACTGCGGCGGAAACCGTTCCGGCATG  
GCCTATCTCGAGCGTGTGCGCGGGCACGGTGACCGGGCCGCCTGCACGTGTCCGAGGAAGGCACCCGGATCGACCTCGCC  
GCCCTCCTCGCCGAGCCCGCCCGCGCGTCCAGATCTACGCGTGC GGGCCCGGGCGGCTGCTCGCCGGACTCGAGGACGCG  
AGCCGGAAC TGGCCCGACGGGGCGCTGCACGTCGAGCACTT CACCTCGTCCCTCGCGGCGCTCGATCCGGACGTCGAGCAC  
GCCTTCGACCTCGAACTGCGT GACTCGGGGCTGACCGTGC GGGTGAACCCACCCAGACCGTCTCGACGCGTTCGCGGCC  
AACAAATCGACGTGCCCAGCGACTGCGAGGAA GGCC TCTGCGGCTCGT GCGAGGTCGCCGTCCTCGACGGCGAGGTCGAC  
CATCGCGACACGGTGCTGACCAAGGCCGAGCGGGCGGCGAA CCGGCAGATGATGACCTGCTGCTCGCTGCCTGTGGCGAC  
CGGCTGGCCCTGCGCCTCTGA

MAPPEEPAPPPIRDWAALDLAGTEFDPVLRRLMRDGPITRIRLPHGEGWAWLATRYDDVKLITNDPRFSRAEVTRRQVTR  
LAPHFKPRPGSLAWADQPDHNRLRPVSAFTVGAMKRLRPRAQELLEDLVDA LVQAGPPADLVERVLEPFPIAVVSEVMG  
VPPADREQVHAWTRQII SMCGGAEAADRAKQGMYGWIRRTVRERRDSSAEDVLSLLGAAVGRGEI SEEEAVGLAGPLQIGG  
EAVTHNCGQMLYLLLTRPELMARMRERPGERGPVDELLRHIPHRSTVGLARIALEDVELHGVRIAAGEPVYVSYLANRD  
PDVFPDPDRIDPDREPRPHLSFGNGPHYCTGAVLARLQTELLIDTLLDRLPGLRLAVSPGQVAWRRQTMIRGPRTLPTWE  
FVLHRHQVPTIGE PAARAVSRTVTVERLDRIADDVLRVLRDAGGKTLPTWTPGAHIDL DLGALSQYSLCGAPDAPSYEI  
AVHLD PESRGGSRYIHEQLEVGSPLRMRGPRNFALDPGAEHYV FVAGGIGITPVLAMADHARARGWSYELHYCGRNRSGM  
AYLERVAGHGDRAALHVSEEGTRIDL AALLAEPAPGVQIYACGPGRLLAGLEDASRNWPDGALHVEHFTSSLAALDPDVEH  
AFDLELRDSGLTVRVEPTQTVLDALRANNIDVPSDCEEGLCGSCEVAVLDGEVDHRD TVLTKAERAANRQMMTCCSRACGD  
RLALRL

## Functional expression in of fungal P450 in yeast

**Functional expression of KtnC in *S. cerevisiae*.** *S. cerevisiae* strain BY4742 cells were prepared for transformation with pESC-HIS expression plasmid harboring *ktnC* through a standard protocol for lithium acetate transformations.<sup>45</sup> Transformed cells were plated on histidine dropout plates containing 4% glucose. After 2-3 d of growth at 30 °C, colonies were inoculated in histidine dropout minimal medium containing 4% glucose and grown overnight at 30 °C with shaking at 235 rpm. Cultures were induced for expression by resuspension (1:1) in histidine dropout minimal media containing 6% galactose. Expression cultures were grown at 30 °C with shaking at 235 rpm for 2-5 days. For biotransformations, substrate was spiked into the expression culture at the point of induction.

**Cloning *ktnC* into pPIC3.5 *P. pastoris* expression vector.** The open reading frame for *ktnC* was amplified from a pJET1.2 cloning plasmid with a forward primer that incorporated a 5' EcoRI restriction site, Kozak sequence, and FLAG tag (5'-CATGATGAATTCATAATGTCTGACTACAAAGACGATGACGACAAGATTGATCCTTCACCATGGCAGTTCATGTACCATTC-3') and a reverse primer with a 3' AvrII restriction site (5'-CATGTA CCTAGGCTTCCCGTCACTTCTTGG-3'). PCRs were performed with NEB reagents in 50  $\mu$ L reaction volumes containing 1X HF Phusion buffer, 0.2 mM dNTPs, 0.5  $\mu$ M of each of the primers, 20 units of Phusion DNA polymerase, and 5  $\mu$ L template plasmid DNA. The reaction conditions were programmed as follows: 95 °C denaturation for 2 min; 30 cycles of 95 °C for 30 sec, 61 °C for 1 min, 72 °C for 3 min; and a final 72 °C extension for 5 min. PCR products were extracted from a 0.8% agarose gel and cloned into a pPIC3.5 plasmid (Invitrogen) for expression in the *P. pastoris*. Digestion reactions contained 3  $\mu$ g of DNA in 1X Cutsmart buffer and 2  $\mu$ L each of EcoRI and AvrII restriction enzymes (NEB) in a 50  $\mu$ L reaction volume. Reactions were incubated at 37 °C for 2.5 h before quenching and purification of the DNA with a PCR clean-up. Ligation reactions contained 100 ng of plasmid DNA and 100 ng of insert were incubated with 1X T4 DNA ligase buffer and 1 unit of T4 DNA ligase enzyme (NEB) in 10  $\mu$ L reaction volumes for 1 h at room temperature, followed by a 65 °C heat inactivation for 10 min. Ligations were transformed in DH5 $\alpha$  *E. coli* cells and transformants were confirmed for gene integration by Sanger sequencing.

**Functional expression of KtnC in *P. pastoris*.** The expression plasmids harboring *ktnC* was linearized with Sall-HF restriction enzyme (NEB) using the same digestion procedures as previously described. *P. pastoris* strain KM71 electrocompetent cells were prepared as described by Madden et al.<sup>46</sup> and transformed with 0.1-2  $\mu$ g of linearized DNA by electroporation. Electroporated cells were immediately recovered in PERS (1 M sorbitol and YPD, 1:1 v/v) and incubated for 1-4 h at 30 °C with shaking at 100 rpm before plating cells on MD plates (1.34% YNB, 4 x 10<sup>-5</sup>% biotin, 2% dextrose, 1.5% agar). After 2 d of growth at 30 °C, colonies were inoculated in BMG medium (100 mM potassium phosphate pH 6.0, 1.34% YNB, 4 x 10<sup>-5</sup>% biotin, 1% glycerol) and grown overnight at 30 °C with shaking at 235 rpm. Cultures were induced for expression by resuspension (5:1) in BMM medium (100 mM potassium phosphate pH 6.0, 1.34% YNB, 4 x 10<sup>-5</sup>% biotin, 0.5% methanol). Expression cultures were grown at 30 °C with shaking at 235 rpm for 2-5 days and supplemented daily with methanol to maintain 0.5% methanol in the cultures. For biotransformations, substrate was spiked into the expression culture at the point of induction.

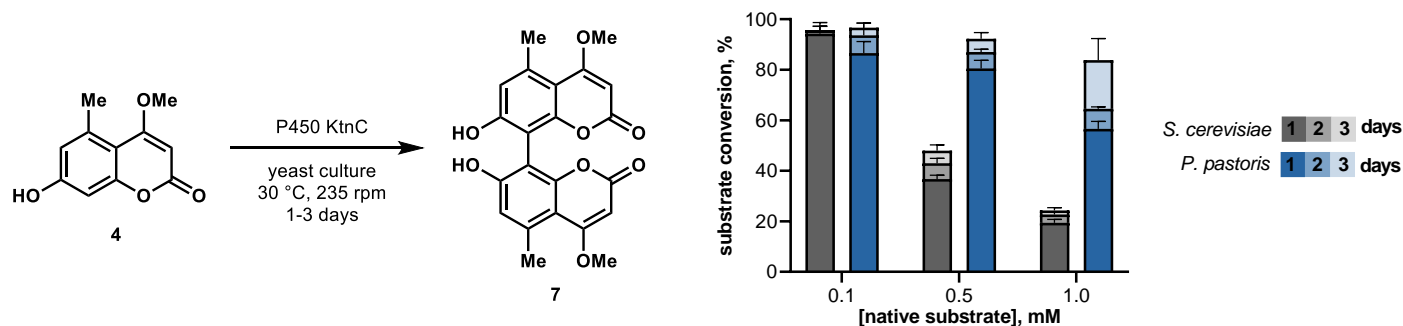

**Supplemental Figure S28.** Substrate tolerance in yeast biotransformations of 4 to 7 showed increased dimerization activity and substrate tolerance in *P. pastoris* expression cultures compared to *S. cerevisiae*.



## **Expression and purification of bacterial enzymes**

Proteins were heterologously expressed in Lemo21(DE3) or BL21(DE3) *E. coli* cells. HisPur nickel-nitrilotriacetic acid resin (Ni-NTA resin) was purchased from Thermo Scientific. Proteins were concentrated at 3,000 x g at 4 °C using Amicon centrifuge filters purchased from EMD Millipore. Protein samples were analyzed by mini SDS-PAGE gels and visualized with Protein Ark Quick Coomassie Stain (Anatrace). Total P450 concentration was quantified by carbon monoxide (CO) binding assays.<sup>47</sup> All purification steps were performed at 4 °C.

**General protocol for expression and purification of CYP158A2.** Chemically competent Lemo21(DE3) cells were transformed with a pET28a(+) plasmid encoding CYP158A2 using standard heat shock procedures and grown on LB agar plates containing 50 µg/mL kanamycin overnight at 37 °C. A single colony was used to inoculate 25 mL of LB media containing 50 µg/mL kanamycin. The culture was incubated overnight at 37 °C, 200 rpm. The overnight culture was used to inoculate 6 x 2.8-L flasks, each containing 1 L of TB media containing 4% glycerol (v/v) and 50 µg/mL kanamycin. The 1-L cultures were incubated at 37 °C, 200 rpm until reaching an optical density at 600 nm (OD<sub>600</sub>) of ~0.5-0.8. Isopropyl-β-D-1-thiogalactopyranoside (IPTG) was added to 0.5 mM to induce and 5-aminolevulinic acid (5-ALA) was added to 1 mM for heme synthesis. Cultures were incubated at 20 °C, 200 rpm for 20 h and harvested by centrifugation at 4,000 x g at 4 °C for 20 min. Harvested cells were stored at -80 °C before lysis and purification.

Harvested cells were thawed and resuspended in ~200 mL of lysis buffer (50 mM tricine pH 8, 500 mM NaCl, 10% glycerol, 0.5 mM EDTA). The cells were lysed by sonication for 5 min total in cycles of 5 seconds on and 10 seconds off. The lysed cell mixture was then centrifuged at 40,000 x g for 40 min at 4 °C. The clarified lysate was combined with equilibrated Ni-NTA resin (3-mL bed volume) and incubated on a rocker at 4 °C for 2 h. The resin was collected in a gravity-flow column and washed with 20 mL of lysis buffer containing 10 mM imidazole and 30 mM imidazole each. Enriched His-tagged CYP158A2 was eluted from the resin with up to 20 mL lysis buffer containing 250 mM imidazole. CYP158A2 eluted as a dark red protein. The eluted CYP158A2 was concentrated and exchanged into storage buffer (50 mM tricine pH 8, 150 mM NaCl, 10% glycerol, 0.5 mM EDTA), flash frozen with liquid nitrogen, and stored at -80 °C for future use.

**Cloning CYP158A2 into A2-RhFRed fusion construct.** The open reading frame for *cyp158a2* was amplified with primers that incorporated a 5' NdeI restriction site and a 3' EcoRI restriction site. PCRs were performed with NEB reagents in 50 µL reaction volumes containing 1X HF Phusion buffer, 0.2 mM dNTPs, 0.5 µM each for forward and reverse primers (5'-GAGTTCCATATGATGACTGAAGAGACAATATCACAAGC-3' and 5'-GATAGAATTCCCAGGTGACCGGCAG-3', respectively), 20 units of Phusion DNA polymerase, and 1 µL template plasmid DNA. The reaction conditions were programmed as follows: 98 °C denaturation for 30 sec; 35 cycles of 98 °C for 10 sec, 61 °C for 30 sec, 75 °C for 1.5 min; and a final 75 °C extension for 10 min. PCR products were extracted from a 0.8% agarose gel and cloned into a pET28b vector harboring a gene encoding the RhFRed reductase domain. Digestion reactions contained 3 µg of DNA in 1X Cutsmart buffer and 2 µL each of NdeI and EcoRI restriction enzymes (NEB) in a 50 µL reaction volume. Reactions were incubated at 37 °C for 2.5 h before quenching and purification of the DNA with a PCR clean-up or gel extraction. Ligation reactions contained 100 ng of plasmid DNA and 100 ng of insert were incubated with 1X T4 DNA ligase buffer and 1 unit of T4 DNA ligase enzyme (NEB) in 10 µL reaction volumes for 2 h at room temperature, followed by a 65 °C heat inactivation for 10 min. Ligations were transformed in DH5α *E. coli* cells and transformants were confirmed for gene integration by Sanger sequencing.

**Expression and purification of P450-RhFRed.** Chemically competent BL21(DE3) cells were transformed with a pET28b plasmid encoding P450-RhFRed using standard heat shock procedures and grown on LB agar plates containing 50 µg/mL kanamycin overnight at 37 °C. A single colony was used to inoculate 25 mL of LB media containing 50 µg/mL kanamycin. The culture was incubated overnight at 37 °C, 200 rpm. The overnight culture was used to inoculate 6 x 2.8-L flasks, each containing 1 L of TB media containing 4% glycerol (v/v) and 50 µg/mL kanamycin. The 1-L cultures were incubated at 37 °C, 200 rpm until reaching an optical density at 600 nm (OD<sub>600</sub>) of ~0.5-0.8. Isopropyl-β-D-1-thiogalactopyranoside (IPTG) was added to 0.1 mM to induce and 5-aminolevulinic acid (5-ALA) was added to 1 mM for heme synthesis. Cultures were incubated at 20 °C, 200 rpm

for 20 h and harvested by centrifugation at 4,000 x g at 4 °C for 20 min. Harvested cells were stored at –80 °C before lysis and purification. The same purification procedure was used as for CYP158A2.

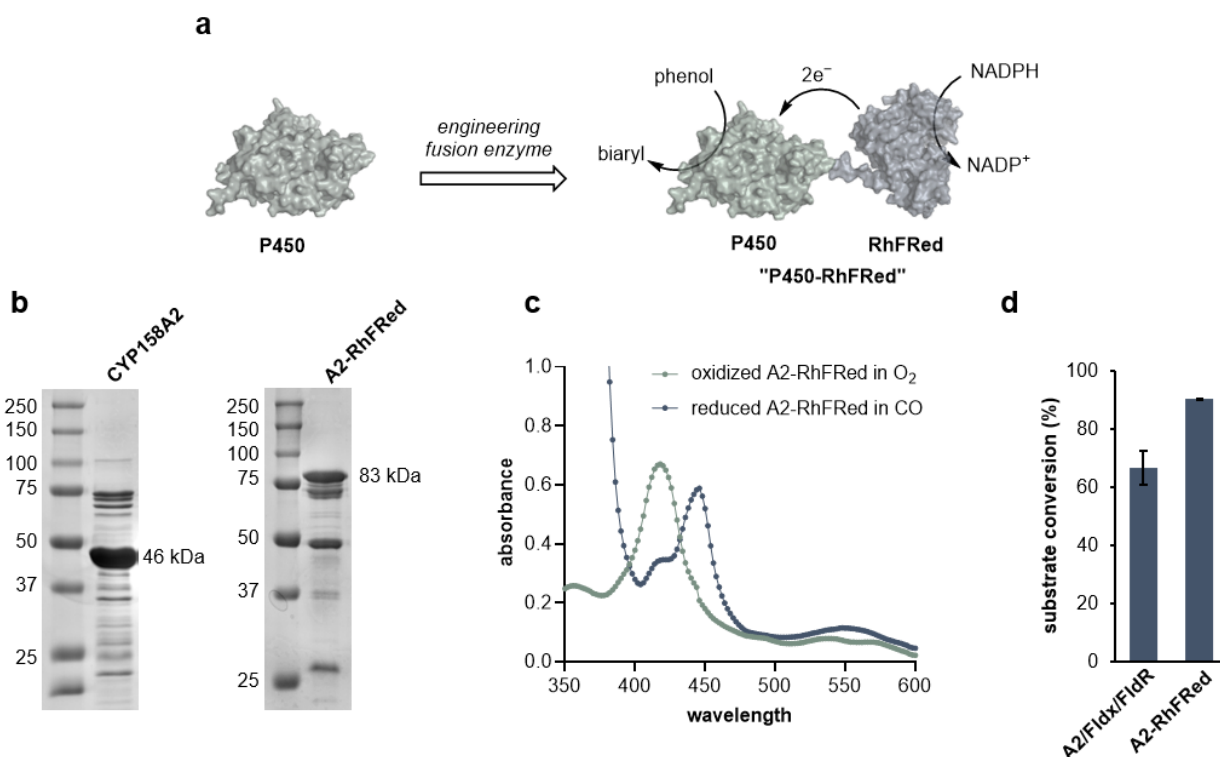

**Supplemental Figure S29.** Validation of P450-RhFRed engineering strategy using CYP158A2 as a model system. **(a)** Strategy for P450-RhFRed engineering. **(b)** SDS-PAGE analysis of purified CYP158A2 and A2-RhFRed show the expected molecular weights. **(c)** UV-Vis analysis of purified A2-RhFRed show the characteristic peak at 450 nm for CO-bound heme. **(d)** Relative dimerization activity of CYP158A2 using a reconstituted Fldx/FldR redox system and A2-RhFRed with native flaviolin (**37**) substrate show improved activity with A2-RhFRed.

**96-well plate expression of bacterial P450-RhFRed enzymes identified in SSN analysis.** Chemically competent LEMO(DE3) cells were transformed with a pET28b plasmid encoding P450-RhFRed using standard heat shock procedures. The transformations were used to directly inoculate 400  $\mu$ L LB containing 50  $\mu$ g/mL kanamycin in a 96-well plate and grown overnight at 37 °C, 350 rpm. The overnight cultures (10  $\mu$ L each) were used to inoculate 400  $\mu$ L TB containing 4% glycerol (v/v) and 50  $\mu$ g/mL kanamycin. The cultures were incubated at 37 °C, 350 rpm until reaching an optical density at 600 nm (OD<sub>600</sub>) of ~0.8-1.0. Isopropyl-b-D-1-thiogalactopyranoside (IPTG) was added to 0.5 mM to induce expression and 5-aminolevulinic acid (5-ALA) was added to 1 mM for heme synthesis. Cultures were incubated at 20 °C, 350 rpm for 20 h and harvested by centrifugation at 1,000 x g at 4 °C for 15 min. Plates containing harvested cells were stored at –80 °C before lysate reactions.

**Supplemental Table S3.** Panel of 23 enzymes screened in lysate reactions. See page S53-55 for full sequences of bolded enzymes.

|   | 1               | 2                 | 3               | 4          | 5          | 6                 |
|---|-----------------|-------------------|-----------------|------------|------------|-------------------|
| A | <i>negative</i> | CYP158A1          | <b>CYP158A2</b> | P450-mel   | A0A4R7HLN1 | A0A6H0CVT5        |
| B | A0A221NTD0      | A0A345T2R4        | A0A4Y3VFB2      | A0A6I6FHD3 | A0A0B5DS97 | A0A1C5CYG0        |
| C | A0A0C2AVS8      | A0A1G8ZS81        | A0A3N6F9N6      | A0A2M9JRU5 | A0A0N9I1K4 | <b>A0A1J4PSC8</b> |
| D | A0A4D4MK74      | <b>A0A6B3DVM9</b> | A0A2P8Q811      | A0A6G3S9J1 | A0A1G9MX20 | A0A2G7EEB4        |

### III. Biocatalytic reactions with fungal P450 KtnC

#### Methods for biocatalytic cross-couplings

**General protocol.** A colony of *P. pastoris* KM71 containing KtnC was inoculated in 6 mL BMG medium and grown overnight at 30 °C with shaking at 235 rpm. The culture was added to BMG medium (125 mL) and grown at 30 °C with shaking at 235 rpm until the optical density at 600 nm was in the range of 10-16. Cultures were induced for expression by resuspension in BMM medium to a final optical density of 30. Substrates were added to 24-well plates from a 25 or 50 mM stock in DMSO, followed by 1 mL aliquots of expression cultures. The 24 well plates were sealed with an adhesive cover and grown at 30 °C with shaking at 235 rpm for 48h and supplemented with 100  $\mu$ L of 10X methanol (5% MeOH, 95% water) after 24 h. Reactions were carried out with final substrate concentrations in a 1:10 molar ratio (25  $\mu$ M of **4** and 250  $\mu$ M of coupling partner or 100  $\mu$ M of **4** and 1000  $\mu$ M coupling partner).

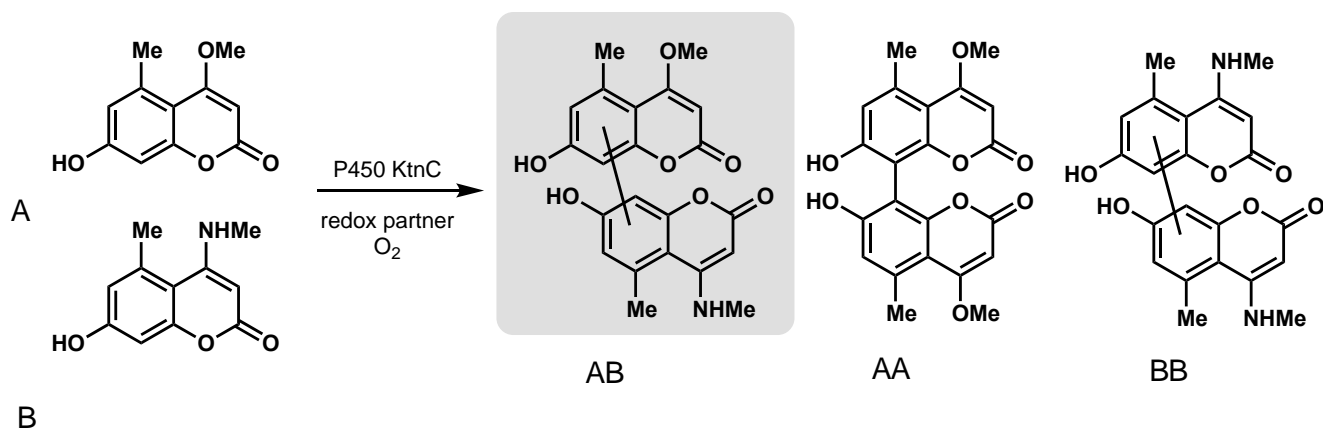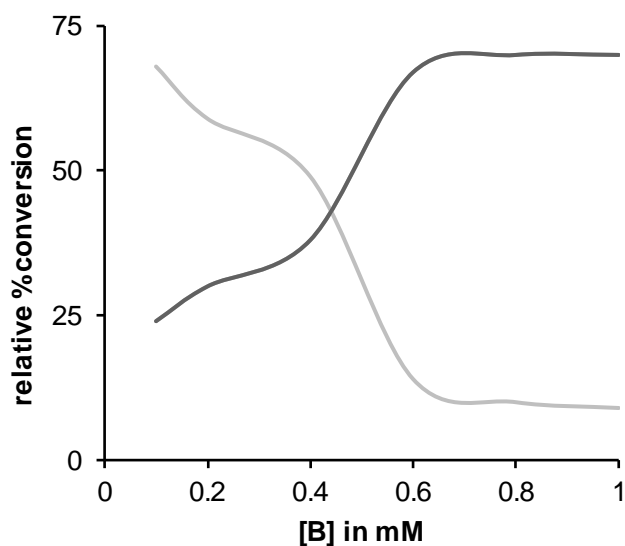

| entry | [A] | [B] | % AA | % AB | AA:AB |
|-------|-----|-----|------|------|-------|
| 1     | 0.1 | 0.1 | 68   | 24   | 3:1   |
| 2     | 0.1 | 0.2 | 59   | 30   | 2:1   |
| 3     | 0.1 | 0.4 | 49   | 38   | 1:1   |
| 4     | 0.1 | 0.6 | 14   | 67   | 1:5   |
| 5     | 0.1 | 0.8 | 10   | 70   | 1:7   |
| 6     | 0.1 | 1.0 | 9    | 70   | 1:7   |

[A] & [B] in mM, *P. pastoris*, 30 °C, 235 RPM, 2 d

**Supplemental Figure S30.** Optimization of analytical scale whole-cell biotransformations for oxidative cross-coupling. The effect of increasing concentration of coupling partner B on percent conversion to cross-coupled product (AB) was monitored by LC-MS and relative percent conversions were calculated (see below for analysis methods).

**Quantification of reaction conversion.** Percent conversion was calculated based on consumption of coumarin starting material **4** and formation of coumarin dimer **7** compared to a standard curve with an internal standard. To generate the standard curves, a colony of *P. pastoris* KM71 was inoculated in 6 mL BMG medium and grown overnight at 30 °C with shaking at 235 rpm. The culture was added to BMG medium (125 to 200 mL) and grown at 30 °C with shaking at 235 rpm until the optical density at 600 nm was in the range of 9-14. Cultures were induced for expression by resuspension in BMM medium to a final optical density of 30. Solutions of starting material coumarin **4** and dimer product **7** were prepared in triplicate by serial dilution with DMSO. The stock solutions of standards were added to 24-well plates, followed by 1 mL aliquots of expression cultures with final concentrations from 0 up to 100 or 150 µM coumarin **4** and 0 to 50 or 75 µM dimer **7**. The 24-well plates were sealed with an adhesive cover and grown at 30 °C with shaking at 235 rpm for 48 h and supplemented with 100 µL of 10X methanol (5% MeOH, 95% water) after 24 h. The cultures were subjected to chemical lysis by the addition of 200 µL CellLytic Y Cell Lysis Reagent (Sigma) then incubated at 30 °C with shaking at 235 rpm for 30 min. An aliquot (50 µL) of the samples were removed and diluted with 150 µL methanol containing an internal standard, either 1,3,5-trimethoxybenzene with a final concentration of 300 µM or 4,4'-dihydroxybenzophenone for a final concentration of 40 µM. Precipitated yeast cells were pelleted by centrifugation (17,000 x g for 10 min), or filtered through Pall AcroPrep Advance 350 µL 0.2 µm GHP Short Tip Natural PP 96-well filter plates by centrifugation (2000 rpm for 3 min). The samples were subjected to liquid chromatography PDA spectrometry (UPLC) analysis performed on an Agilent 6230 time of flight mass spectrometer with a Dual AJS ESI source and an Agilent 1290 Infinity Series II diode array detector, autosampler, and binary pump, using one of the following conditions:

**Method A.** Waters Acquity UPLC HSS T3 1.8 µm C18, 2.1x50 mm column; positive mode; phase A = deionized water with 2 mM ammonium formate, pH = 3.5 and phase B = 95:5 acetonitrile: deionized water, v/v with 2 mM ammonium formate, pH = 3.5; method = 80% A held for 0.5min, to 45% A over 2.75 min, 10% A 100% A for 1.0 min, 254, 275, and 308 nm UV detection and 0.7 mL/min flow rate. Each injection was followed by equilibration at 80% A for 1 min.

**Method B.** Waters Acquity UPLC HSS T3 1.8 µm C18, 2.1x50 mm column; negative mode; phase A = 95:5 deionized water:acetonitrile B = 95:5 acetonitrile:deionized water; method = 80% A held for 0.5min, to 45% A over 2.75 min, 10% A 100% A for 1.0 min, 254, 275, and 308 nm UV detection and 0.7 mL/min flow rate. Each injection was followed by equilibration at 80% A for 1 min.

**Method C.** Waters Acquity UPLC HSS T3 1.8 µm C18, 2.1x50 mm column; negative mode; phase A = 100% deionized water with 0.1% formic acid: B = 95:5 acetonitrile:deionized water with 0.1% formic acid; method = 80% A held for 0.5min, to 45% A over 2.75 min, 10% A 100% A for 1.0 min, 254, 275, and 308 nm UV detection and 0.7 mL/min flow rate. Each injection was followed by equilibration at 80% A for 1 min.

**Method D.** Waters XBridge 3.5 µm C18, 2.1x150 mm column; positive mode; phase A = deionized water with 0.1% formic acid and phase B = 95:5 acetonitrile:deionized water with 0.1% formic acid; method = 85% A held for 1 min, 85% A to 20% A over 7 min, 20% A held for 1.5 min, and 0.4 mL/min flow rate, with either no UV detection or 254, 275, and 308 nm UV detection.

The percent conversion of the cross-coupled AB products was calculated with respect to the native coumarin **4** coupling partner by quantifying the concentration of remaining starting material A (native coumarin **4**) by standard curve, and the amount of coumarin dimer AA (dimer **7**) formed by standard curve. The concentration of the desired cross-coupled AB products was assumed to be comprised of the remaining. A species according to the formula:

1.  $[A]_{\text{start}} = [A]_{\text{remaining}} + 2 \times [AA]_{\text{formed}} + [AB]_{\text{formed}}$
2. where  $[AB]_{\text{formed}} = [A]_{\text{start}} - [A]_{\text{remaining}} - 2 \times [AA]_{\text{formed}}$
3.  $\% \text{ AB} = [AB]_{\text{formed}} / [A]_{\text{start}} * 100\%$
4.  $\% \text{ AA} = [AA]_{\text{formed}} / [AA]_{\text{max}} * 100\%$  where  $[AA]_{\text{max}}$  is the theoretical maximum concentration possible

Standard curves for  $[A]_{\text{remaining}}$  and  $[AA]_{\text{formed}}$  were generated by using MassHunter software to process the raw data files. Extracted Ion Chromatograms to find peak integration of each species A, AA, and the internal standard (IS) with the peak integrations normalized by the internal standard (A/IS and AA/IS).

**Determination of oxidative cross-coupling site-selectivity.** A colony of *P. pastoris* KM71 was inoculated in 6 mL BMG medium and grown overnight at 30 °C with shaking at 235 rpm. The culture was added to BMG medium (100 or 200 mL) and grown at 30 °C with shaking at 235 rpm until the optical density at 600 nm was in the range of 9-11. Cultures were induced for expression by resuspension in BMM medium to a final optical density of 30. Substrates were added to 24-well plates from 50 mM stock in DMSO, followed by 1 mL of expression cultures. The 24-well plates were sealed with an adhesive cover and grown at 30 °C with shaking at 235 rpm for 48 h and supplemented with 100  $\mu$ L of 10X methanol (5% MeOH, 95% water) after 24 h. Reactions were carried out with final substrate concentrations of 100  $\mu$ M of coumarin **4** or **10**, and 1000  $\mu$ M coupling partner. The cultures were subjected to chemical lysis by the addition of 200  $\mu$ L CellLytic Y Cell Lysis Reagent (Sigma) then incubated at 30 °C with shaking at 235 rpm for 30 min. An aliquot (100  $\mu$ L) of the samples were removed and diluted with 300  $\mu$ L methanol containing 4,4-dihydroxybenzophenone for a final concentration of 40  $\mu$ M as internal standard. Precipitated yeast cells were pelleted by centrifugation (17,000  $\times$  *g* for 10 min). The samples were subjected to liquid chromatography PDA spectrometry (UPLC) analysis performed on an Agilent 6230 time of flight mass spectrometer with a Dual AJS ESI source and an Agilent 1290 Infinity Series II diode array detector, autosampler, and binary pump, using one of the following conditions:

**Method B.** Waters Acquity UPLC HSS T3 1.8  $\mu$ m C18, 2.1x50 mm column; negative mode; phase A = 95:5 deionized water:acetonitrile B = 95:5 acetonitrile:deionized water; method = 80% A held for 0.5min, to 45% A over 2.75 min, 10% A 100% A for 1.0 min, 254, 275, and 308 nm UV detection and 0.7 mL/min flow rate. Each injection was followed by equilibration at 80% A for 1 min.

**Method D.** Waters XBridge 3.5  $\mu$ m C18, 2.1x150 mm column; positive mode; phase A = deionized water with 0.1% formic acid and phase B = 95:5 acetonitrile:deionized water with 0.1% formic acid; method = 85% A held for 1 min, 85% A to 20% A over 7 min, 20% A held for 1.5 min, and 0.4 mL/min flow rate, with either no UV detection or 254, 275, and 308 nm UV detection.

**Isolation of biocatalytic products for site-selectivity determination.** To determine the site-selectivity of select reactions (Figure 2b), several different biocatalytic reactions were performed on a larger scale to enable the isolation of coupled products with different connectivities. General considerations of isolation of products from preparative-scale yeast biotransformations include (1) solubility challenges of hydroxycoumarin compounds and their dimers in common organic solvents, (2) adsorption of products to biological material during biocatalytic reactions, and (3) product crashing out and remaining in cell debris during workup. Additionally, based on the similarity in structure and physical properties of bicoumarin dimers and cross-coupled products, the preparative separation of these compounds can be extremely challenging. Thus, analytical quantification can uniformly provide an accurate assessment of reaction outcome while there is some variability in the material that can be pristinely isolated following multiple columns to remove traces of other isomers. In cases where the components of the reaction mixture are readily separable by chromatography, good agreement is seen between the analytical and isolated metrics for both small molecule methods and this enzymatic method.

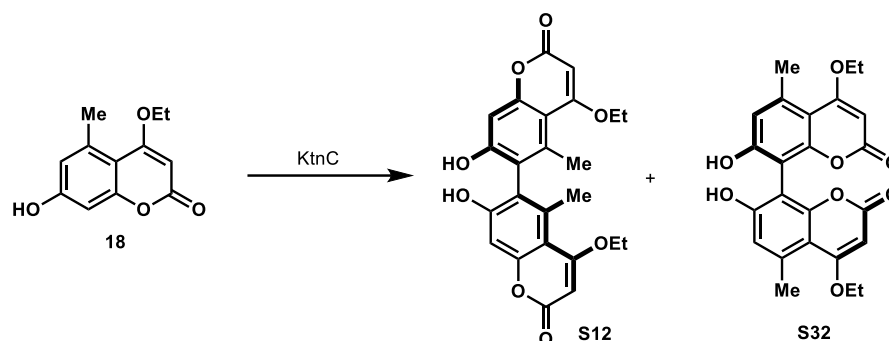

**KtnC-catalyzed dimerization of 4-ethoxy-7-hydroxy-5-methyl-2H-chromen-2-one (18).** Cultures containing KtnC were grown and concentrated to an optical density at 600 nm of 13. The biotransformation on 0.2 mmol substrate was halted after 72 h (74% conversion). The cell pellet was separated from the supernatant and frozen with liquid nitrogen. The aqueous supernatant was partially concentrated under reduced pressure, acidified with 1 M HCl (5 mL), and extracted with ethyl acetate (3x). The organic layers were combined, washed with brine, dried over Na<sub>2</sub>SO<sub>4</sub>, filtered, and evaporated under reduced pressure. The pellet was ground with a cold mortar and pestle (chilled at -78 °C) and extracted with ethyl acetate by stirring for 2 h. The organic layer was decanted, washed with brine, dried over Na<sub>2</sub>SO<sub>4</sub>, filtered, and evaporated under reduced pressure. The crude solids were purified reversed-phase HPLC (Phenomenex Kinetex 5 μm C18, 150 x 21.2 mm column) under the following conditions: mobile phase A = deionized water + 0.1% formic acid and B = acetonitrile + 0.1% formic acid; method = 70% A for 5 min, 70% A to 65% A over 2.0 min, 65% A for 5 min, 65% A to 60% A over 2.0 min, 60% A for 5 min, 60% A to 40% A over 5 min, 40% A for 5 min, 254 and 308 nm UV detection and 12 mL/min flow rate. The target 6,6'-product **S12** eluted from 20.2-23.1 min to provide 10.5 mg (24% isolated yield) and the 8,8'-product **S32** eluted from 15.4-17.5 min to provide 4.4 mg (10% isolated yield).

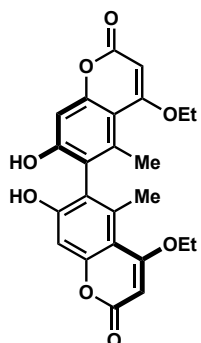

**4,4'-diethoxy-7,7'-dihydroxy-5,5'-dimethyl-2H,2H-[6,6'-bichromene]-2,2'-dione (S12).** Decomposition 276.4-277.5 °C;  $R_f = 0.24$  (8:3:1 toluene/ethyl acetate/formic acid v/v); <sup>1</sup>H NMR (600 MHz, CD<sub>3</sub>OD) δ 6.71 (s, 2H), 5.61 (s, 2H), 4.23 (q,  $J = 7.0$ , 4H), 2.33 (s, 6H), 1.50 (t,  $J = 7.9$ , 6H); <sup>13</sup>C NMR (150 MHz, CD<sub>3</sub>OD) δ 171.7, 166.0, 160.3, 157.3, 139.4, 124.4, 108.3, 101.5, 87.8, 67.0, 19.5, 14.5; IR (thin film, cm<sup>-1</sup>) 3229, 2985, 2941, 1690, 1591, 1558, 1450; HRMS (ESI) calculated for C<sub>24</sub>H<sub>23</sub>O<sub>8</sub><sup>+</sup> [M+H]<sup>+</sup> = 439.1387, found = 439.1392  $m/z$ .

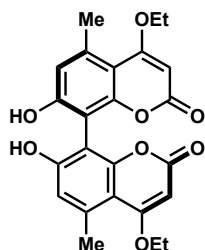

**4,4'-diethoxy-7,7'-dihydroxy-5,5'-dimethyl-2H,2H-[8,8'-bichromene]-2,2'-dione (S32).** MP >310 °C; <sup>1</sup>H NMR (600 MHz, CD<sub>3</sub>OD) δ 6.75 (s, 2H), 5.55 (s, 2H), 4.24 (q,  $J = 7.1$ , 4H), 2.71 (s, 6H), 1.55 (t,  $J = 7.2$ , 6H); <sup>1</sup>H NMR (600 MHz, acetone-*d*<sub>6</sub>) δ 6.75 (s, 2H), 5.43 (s, 2H), 4.24 (q,  $J = 6.9$ , 4H), 2.67 (s, 6H), 1.54 (t,  $J = 7.0$ , 6H); <sup>13</sup>C NMR (150 MHz, acetone-*d*<sub>6</sub>) δ 169.7, 162.5, 159.9, 155.8, 138.8, 116.9, 107.9, 106.8, 87.7, 66.1, 23.9, 14.5; IR (thin film, cm<sup>-1</sup>) 3114, 2980, 2933, 1673, 1609, 1554, 1470, 1452; HRMS (ESI) calculated for C<sub>24</sub>H<sub>23</sub>O<sub>8</sub><sup>+</sup> [M+H]<sup>+</sup> = 439.1387, found = 439.1398  $m/z$ .

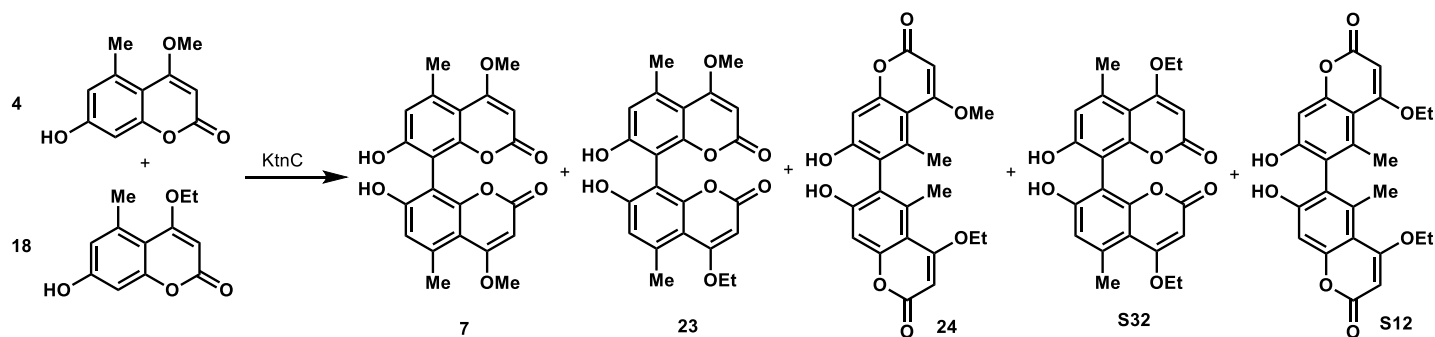

**KtnC-catalyzed cross-coupling of 7-hydroxy-4-methoxy-5-methyl-2H-chromen-2-one (4) and 4-ethoxy-7-hydroxy-5-methyl-2H-chromen-2-one (18).** Cultures containing KtnC were grown to an optical density at 600 nm of 6. The biotransformation was performed according to the general procedure in *P. pastoris*, in 500 mL BMM media with 0.05 mmol **4** (10.3 mg) and 1.0 mmol **18** (110.1 mg) was halted after 96 h (95% total consumption of substrate **4**). The cell pellet was separated from the supernatant and frozen with liquid nitrogen. The aqueous supernatant was acidified with 1 M HCl (10 mL) and extracted with *i*-PrOH and ethyl acetate (3x). The organic layers were combined, washed with brine, dried over Na<sub>2</sub>SO<sub>4</sub>, filtered, and evaporated under reduced pressure. The pellet was ground with a cold mortar and pestle (chilled at -78 °C), acidified with 1 M HCl (5 mL), and extracted with *i*-PrOH and ethyl acetate by stirring for 2 h. The organic layer was decanted, and the aqueous layer was extracted with *i*-PrOH and ethyl acetate (2x). The combined organic layers were washed with brine, dried over Na<sub>2</sub>SO<sub>4</sub>, filtered, and evaporated under reduced pressure. The crude material was dry loaded onto a silica gel column and purified over silica gel with a gradient of 8:3:1 to 7:4:1 to 6:5:1 toluene : ethyl acetate : formic acid to obtain a mixture of cross-coupled products (55% yield of **23** and **24**; see Supplemental Figure S90) along with remaining substrates **4** and **18** and dimers **S32** and **S12**. Additional chromatography is necessary to provide each compound in pure form as described below.

The product mixture was further purified using five rounds of preparative-HPLC (Phenomenex Kinetex 5 μm C18, 150 x 21.2 mm column) under the following conditions: mobile phase A = deionized water + 0.1% formic acid and B = acetonitrile + 0.1% formic acid; method = 70% A for 5 min, 70% A to 65% A over 2.0 min, 65% A for 5.0 min, 65% A to 60% A over 2.0 min, 60% A for 5.0 min, 60% A to 40% A over 5.0 min, 40% A for 2.0 min, 40% A to 10% A over 4.0 min, 10% A for 1.0 min, 254 and 308 nm UV detection and 12 mL/min flow rate. The 8,8'-cross-coupled product **23** and substrate **18** co-eluted as a 3:1 mixture from 11.6-15.0 min to provide **23** in a 6.8% isolated yield. The 6,6'-cross-coupled product **24** and 8,8'-product **S32** co-eluted as a 1:1 mixture from 16.6-19.6 min to provide **24** in a 3.3% isolated yield and **S32** in a 1.4% isolated yield. The 6,6'-product **S12** eluted from 21.6-25.3 min to provide **S12** in a 4.3% isolated yield.

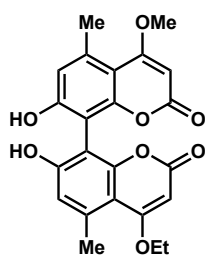

**4-ethoxy-7,7'-dihydroxy-4'-methoxy-5,5'-dimethyl-2H,2'H-[8,8'-bichromene'-2,2'-dione (23).** <sup>1</sup>H NMR (400 MHz, (CD<sub>3</sub>)<sub>2</sub>O) δ 6.76 (s, 2H), 5.50 (s, 1H), 5.45 (s, 1H), 4.25 (q, *J* = 7.0, 2H), 4.02 (s, 3H), 2.67 (s, 3H), 2.64 (s, 3H), 1.54 (t, *J* = 7.0, 3H); <sup>1</sup>H NMR (600 MHz, (CD<sub>3</sub>)SO) δ 10.32 (s, 2H), 6.71 (s, 2H), 5.57 (s, 1H), 5.53 (s, 1H), 4.18 (q, *J* = 7.1, 2H), 3.94 (s, 3H), 2.62 (s, 3H), 2.59 (s, 3H), 1.44 (t, *J* = 6.9, 3H); <sup>13</sup>C NMR (150 MHz, (CD<sub>3</sub>)SO) δ 169.7, 168.7, 161.8, 161.7, 158.7, 158.7, 154.0, 154.0, 137.1, 137.0, 115.7, 115.7, 106.0, 106.0, 105.8, 105.8, 86.6, 86.4, 65.3, 56.5, 23.4, 23.2, 14.0; **98:2 er** (see Supplemental Figure S61); **HRMS** (ESI) calculated for C<sub>23</sub>H<sub>21</sub>O<sub>8</sub><sup>+</sup> [M+H]<sup>+</sup> = 425.1231, found 425.1236 *m/z*.

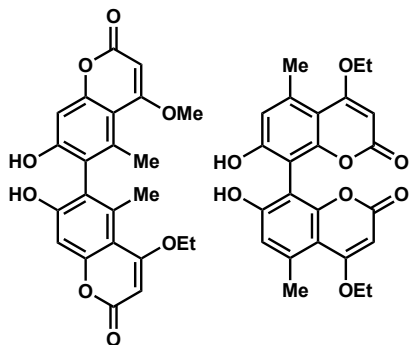

**4-ethoxy-7,7'-dihydroxy-4'-methoxy-5,5'-dimethyl-2H,2H-[6,6'-bichromene]-2,2'-dione (24) and 4,4'-ethoxy-7,7'-dihydroxy-5,5'-dimethyl-2H,2H-[8,8'-bichromene]-2,2'-dione (S32), 1:1 ratio:**  $^1\text{H NMR}$  (600 MHz,  $\text{CD}_3\text{OD}$ )  $\delta$  6.72 (s, 2H), 5.63 (s, 2H), 4.19 (t,  $J = 6.3$ , 4H), 2.33 (s, 6H), 1.87 (q,  $J = 7.0$ , 6.5, 4H), 1.54 (q,  $J = 7.7$ , 4H), 1.00 (t,  $J = 7.4$ , 6H); cross-coupled-product **24**, 79:21 er; **HRMS** (ESI) calculated for  $\text{C}_{23}\text{H}_{21}\text{O}_8^+$   $[\text{M}+\text{H}]^+$  = 425.1231, found = 425.1239  $m/z$ , and for  $\text{C}_{24}\text{H}_{23}\text{O}_8^+$   $[\text{M}+\text{H}]^+$  = 439.1387, found = 439.1395  $m/z$ . Full characterization of racemic 8,8'-product **S32** can be found on page S62, and full characterization of 6,6'-cross-coupled product **24** can be found on page S13.



## Standard curves and quantification of biocatalytic reactions

Supplemental Figure S31. Oxidative cross-coupling of 4 (A) with non-native partner (B) catalyzed by KtnC (Figure 2).

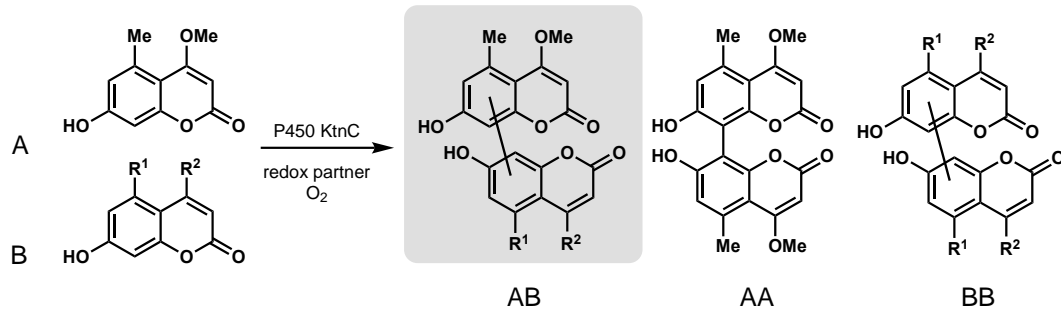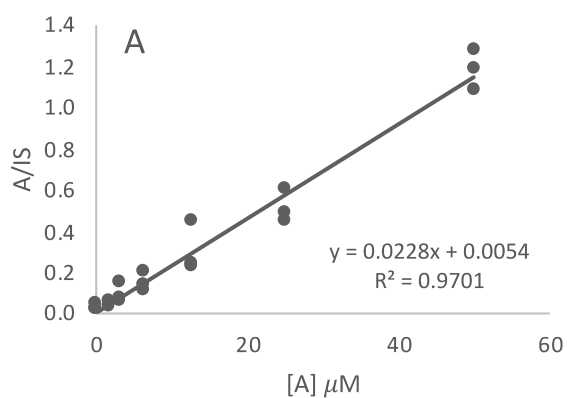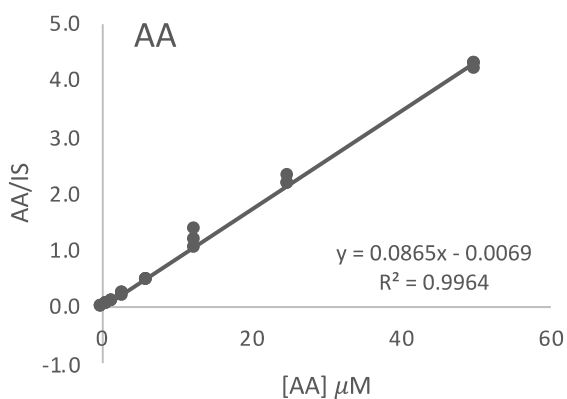

| R1 | R2   | entry # | A/IS | AA/IS | [A] <sub>remaining</sub> | [AA] <sub>present</sub> | AB    | % conv AB | average | % conv AA | average |
|----|------|---------|------|-------|--------------------------|-------------------------|-------|-----------|---------|-----------|---------|
| Me | OEt  | A1      | 0.01 | 0.05  | 1.67                     | 0.64                    | 22.05 | 88.19     | 87.3    | 5.12      | 4.7     |
|    |      | A2      | 0.03 | 0.04  | 2.32                     | 0.53                    | 21.62 | 86.49     |         | 4.24      |         |
| Me | OPr  | A3      | 0.24 | 0.21  | 11.00                    | 2.47                    | 9.06  | 36.22     | 37.7    | 19.79     | 17.9    |
|    |      | A4      | 0.24 | 0.17  | 11.17                    | 2.01                    | 9.80  | 39.22     |         | 16.10     |         |
| Me | OiPr | A5      | 0.11 | 0.26  | 5.74                     | 3.05                    | 13.15 | 52.60     | 54.0    | 24.42     | 26.2    |
|    |      | A6      | 0.07 | 0.29  | 4.17                     | 3.48                    | 13.86 | 55.44     |         | 27.88     |         |
| Me | OBu  | B1      | 0.07 | 0.34  | 3.94                     | 3.96                    | 13.14 | 52.56     | 49.7    | 31.70     | 34.5    |
|    |      | B2      | 0.07 | 0.40  | 3.97                     | 4.66                    | 11.70 | 46.80     |         | 37.30     |         |

**Supplemental Figure S32.** Oxidative cross-coupling of **4** (A) with non-native partner (B) catalyzed by KtnC (Figure 2).

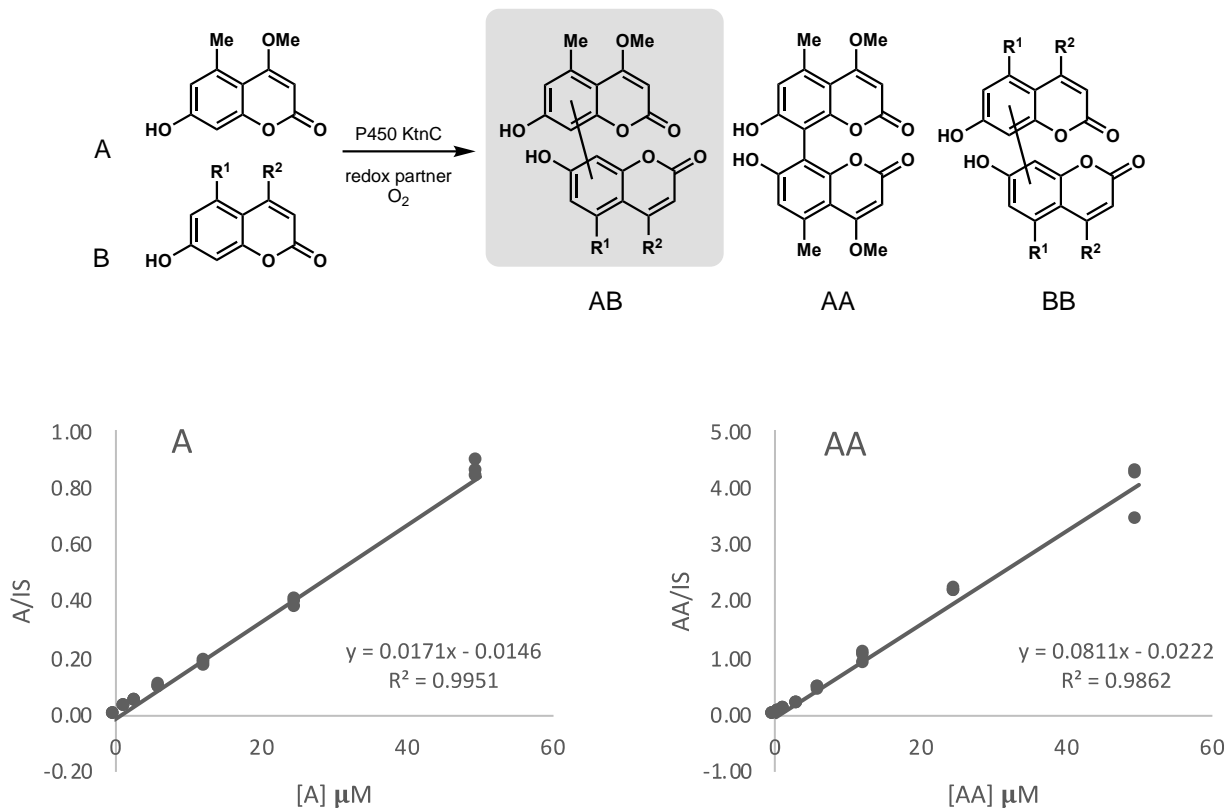

| R1 | R2   | entry # | A/IS  | AA/IS | $A_{\text{remaining}}$ | $AA_{\text{present}}$ | AB    | % conv AB | average | % AA | average |
|----|------|---------|-------|-------|------------------------|-----------------------|-------|-----------|---------|------|---------|
| Me | OtBu | B3      | 0.000 | 0.568 | 0.85302                | 7.27818               | 9.591 | 38.4      | 34.9    | 58.2 | 61.7    |
|    |      | B4      | 0.000 | 0.639 | 0.85302                | 8.15289               | 7.841 | 31.4      |         | 65.2 |         |

**Supplemental Figure S33.** Oxidative cross-coupling of **4** (A) with non-native partner (B) catalyzed by KtnC (Figure 2).

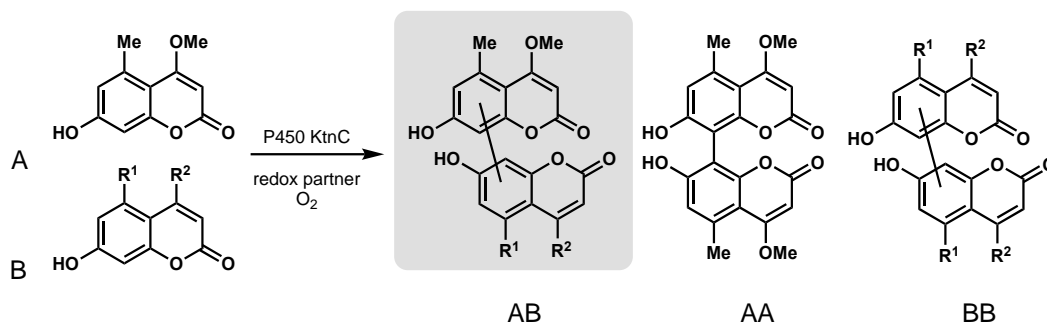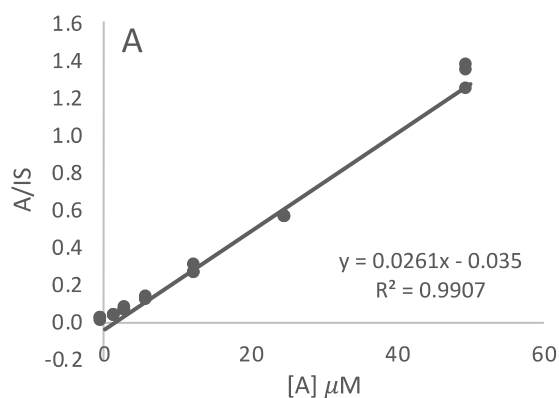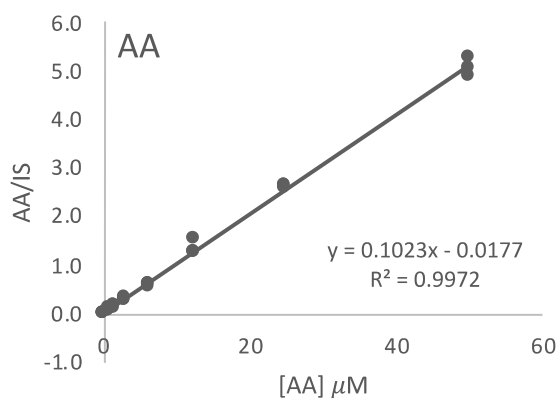

| R1 | R2   | entry # | A/IS  | AA/IS | [A] <sub>remaining</sub> | [AA] <sub>present</sub> | AB     | % conv AB | average | % conv AA | average |
|----|------|---------|-------|-------|--------------------------|-------------------------|--------|-----------|---------|-----------|---------|
| H  | OMe  | A5      | 0.156 | 0.141 | 7.31570                  | 1.54898                 | 14.586 | 58.3      | 67.3    | 12.4      | 14.1    |
|    |      | A6      | 0.016 | 0.185 | 1.97117                  | 1.98662                 | 19.056 | 76.2      |         |           |         |
| Et | OMe  | A1      | 0.371 | 0.009 | 15.55702                 | 0.25933                 | 8.924  | 35.7      | 31.0    | 2.1       | 2.2     |
|    |      | A2      | 0.431 | 0.013 | 17.84073                 | 0.29776                 | 6.564  | 26.3      |         |           |         |
| OH | OMe  | C1      | 0.00  | 0.542 | 1.33926                  | 5.46788                 | 12.725 | 50.9      | 50.2    | 43.7      | 44.5    |
|    |      | C2      | 0.00  | 0.560 | 1.33926                  | 5.64550                 | 12.370 | 49.5      |         |           |         |
| Me | NHMe | A3      | 0.000 | 0.247 | 1.33926                  | 2.58407                 | 18.493 | 74.0      | 74.0    | 20.7      | 20.7    |
|    |      | A4      | 0.000 | 0.246 | 1.33926                  | 2.57929                 | 18.502 | 74.0      |         |           |         |
| Cl | OMe  | C5      | 0.515 | 0.027 | 21.08830                 | 0.43675                 | 3.038  | 12.2      | 21.2    | 3.5       | 4.0     |
|    |      | C6      | 0.391 | 0.041 | 16.31739                 | 0.57053                 | 7.542  | 30.2      |         |           |         |
| Br | OMe  | C3      | 0.396 | 0.016 | 16.50020                 | 0.32768                 | 7.844  | 31.4      | 29.9    | 2.6       | 2.7     |
|    |      | C4      | 0.414 | 0.017 | 17.21717                 | 0.34356                 | 7.096  | 28.4      |         |           |         |
| Me | H    | B1      | 0.000 | 0.265 | 1.33926                  | 2.76393                 | 18.133 | 72.5      | 73.4    | 22.1      | 21.2    |
|    |      | B2      | 0.000 | 0.243 | 1.33926                  | 2.54569                 | 18.569 | 74.3      |         |           |         |
| H  | Me   | B3      | 0.000 | 0.494 | 1.33926                  | 5.00279                 | 13.655 | 54.6      | 54.0    | 40.0      | 40.6    |
|    |      | B4      | 0.000 | 0.510 | 1.33926                  | 5.15688                 | 13.347 | 53.4      |         |           |         |
| H  | H    | C1      | 0.000 | 0.706 | 1.33926                  | 7.07236                 | 9.516  | 38.1      | 39.0    | 56.6      | 55.7    |
|    |      | C2      | 0.000 | 0.683 | 1.33926                  | 6.85020                 | 9.960  | 39.8      |         |           |         |

**Supplemental Figure S34.** Oxidative dimerization of **4** catalyzed by KtnC (**Figure 2**).

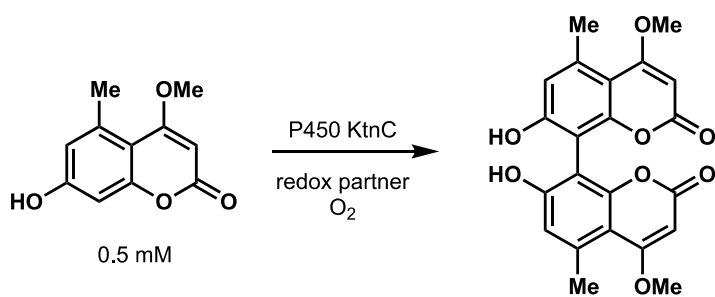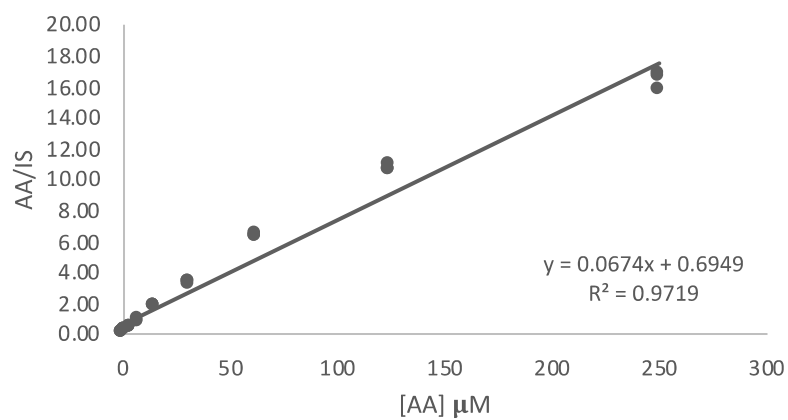

| yeast | Reaction # | Max [AA] | AA/IS | [AA] RXN | % yield | average |
|-------|------------|----------|-------|----------|---------|---------|
| KtnC  | E5         | 250      | 17.9  | 255.6    | 102.3   | 95.2    |
| KtnC  | E6         | 250      | 14.8  | 209.5    | 83.8    |         |
| KtnC  | E7         | 250      | 17.5  | 248.8    | 99.5    |         |

**Supplemental Figure S35.** Oxidative cross-coupling of **4** (A) with non-native **27** (B) catalyzed by KtnC (Figure 2).

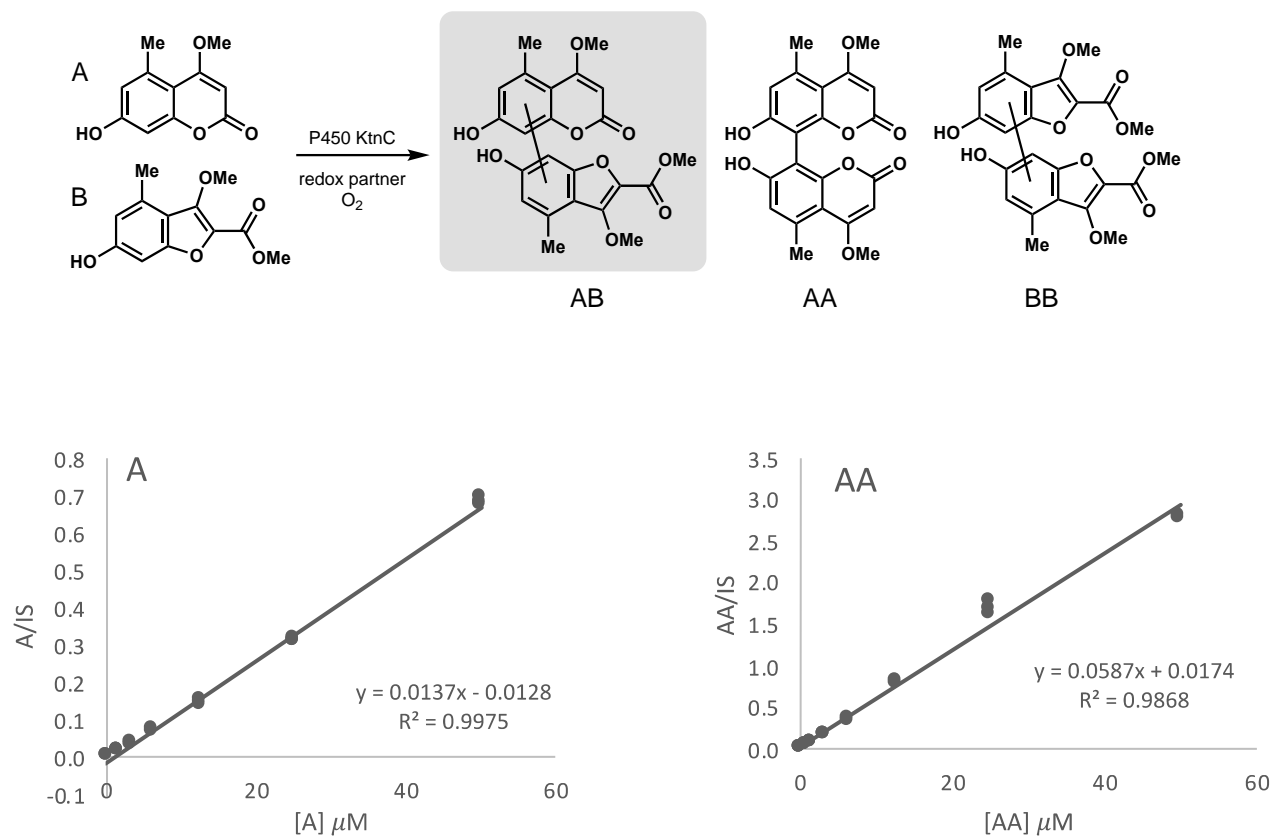

| B partner  | entry # | A/IS  | AA/IS | $[A]_{\text{remaining}}$ | $[AA]_{\text{present}}$ | AB     | % conv AB | average | % conv AA | average |
|------------|---------|-------|-------|--------------------------|-------------------------|--------|-----------|---------|-----------|---------|
| benzofuran | B3      | 0.000 | 0.333 | 0.93431                  | 5.38362                 | 13.298 | 53.2      | 51.9    | 43.1      | 44.4    |
|            | B4      | 0.000 | 0.353 | 0.93431                  | 5.70944                 | 12.647 | 50.6      |         | 45.7      |         |

**Supplemental Figure S36.** Oxidative cross-coupling of **4** (A) with non-native partner (B) catalyzed by KtnC (Figure 2).

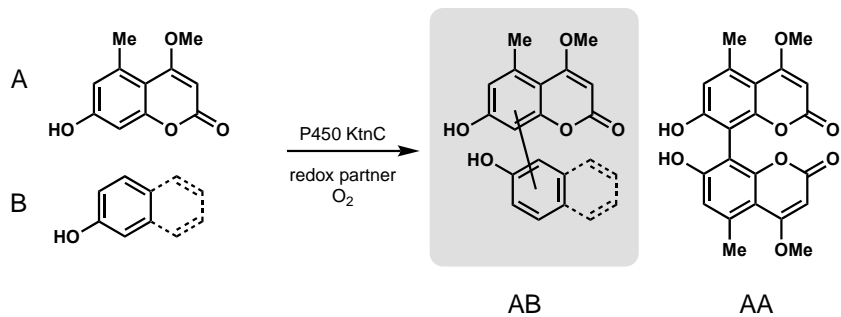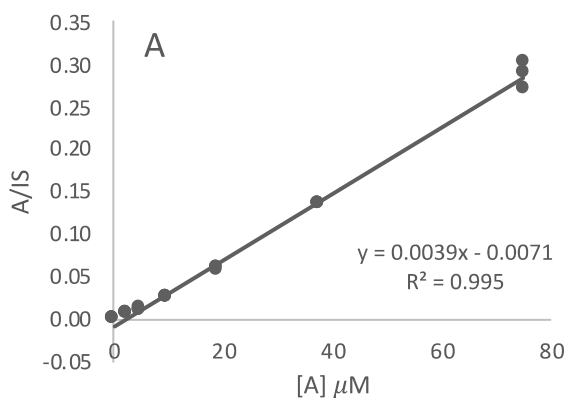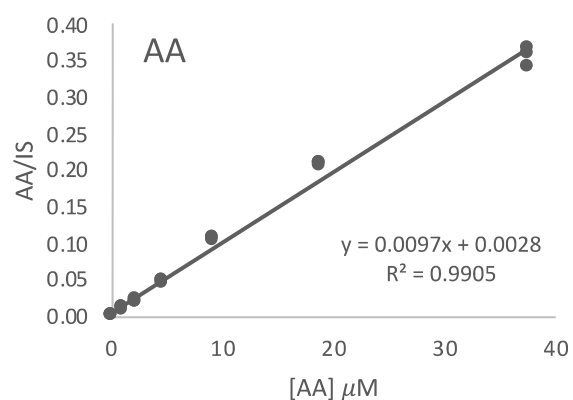

| Phenol               | entry # | A/IS  | AA/IS | [A] <sub>remaining</sub> | [AA] <sub>present</sub> | AB     | % conv AB | average | % conv AA | average |
|----------------------|---------|-------|-------|--------------------------|-------------------------|--------|-----------|---------|-----------|---------|
| quinoline            | C3      | 0.051 | 0.340 | 15.02189                 | 34.84561                | 15.287 | 15.3      | 14.2    | 69.7      | 72.1    |
|                      | C4      | 0.041 | 0.363 | 12.31828                 | 37.27717                | 13.127 | 13.1      |         | 74.6      |         |
| 2-naphthol           | D1      | 0.121 | 0.322 | 33.02458                 | 33.02720                | 0.921  | 0.9       | 2.0     | 66.1      | 65.1    |
|                      | D2      | 0.119 | 0.314 | 32.72324                 | 32.12063                | 3.035  | 3.0       |         | 64.2      |         |
| 7-methoxy-2-naphthol | D3      | 0.250 | 0.051 | 66.52782                 | 4.93853                 | 23.595 | 23.6      | 20.3    | 9.9       | 10.5    |
|                      | D4      | 0.272 | 0.056 | 72.05196                 | 5.51253                 | 16.923 | 16.9      |         | 11.0      |         |
| carbazole            | D5      | 0.001 | 0.388 | 2.15328                  | 39.77408                | 18.299 | 18.3      | 15.4    | 79.5      | 82.0    |
|                      | D6      | 0.005 | 0.412 | 3.05648                  | 42.24427                | 12.455 | 12.5      |         | 84.5      |         |

## LC-MS traces for biocatalytic reactions

Supplemental Figure S37. Oxidative cross-coupling of **4** and **9** by KtnC (Figure 2).

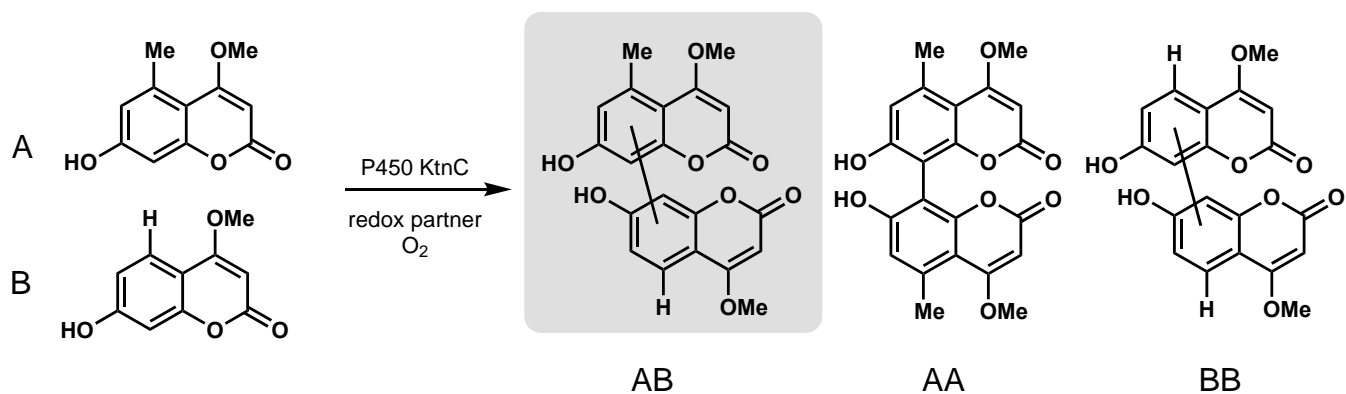

## KtnC

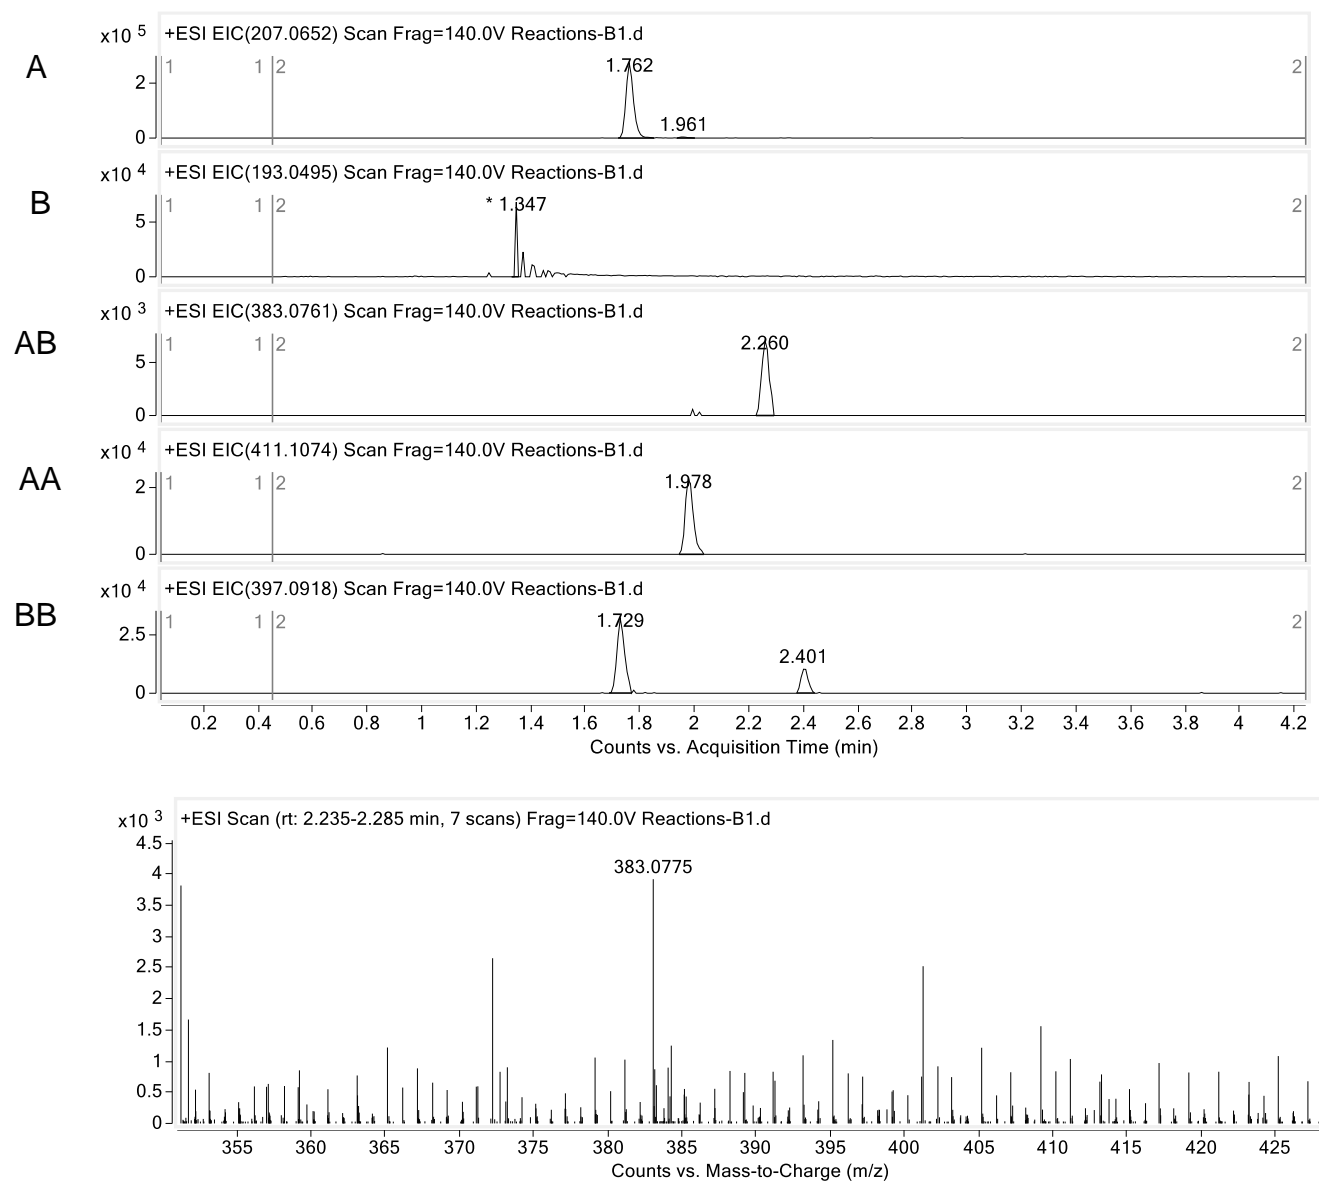

# No Enzyme control

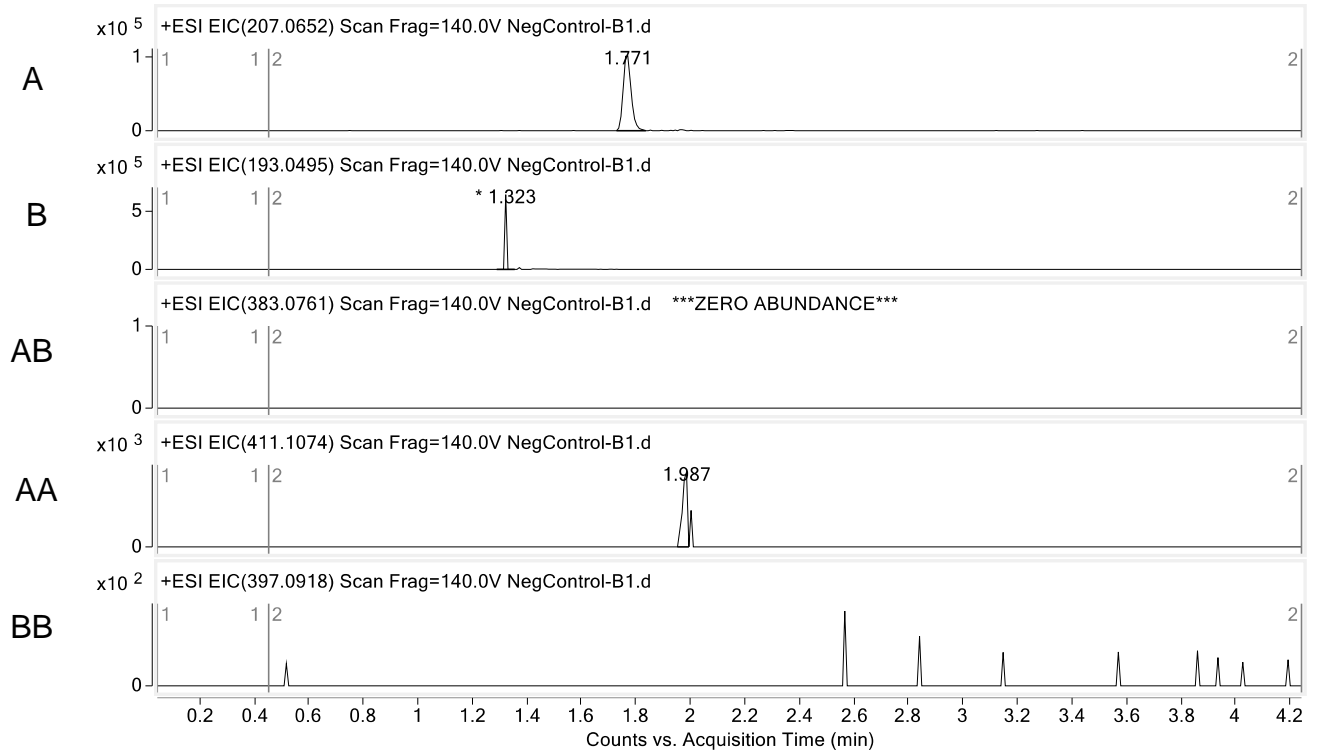



**Supplemental Figure S38.** Oxidative cross-coupling of **4** and **10** by KtnC (**Figure 2**).

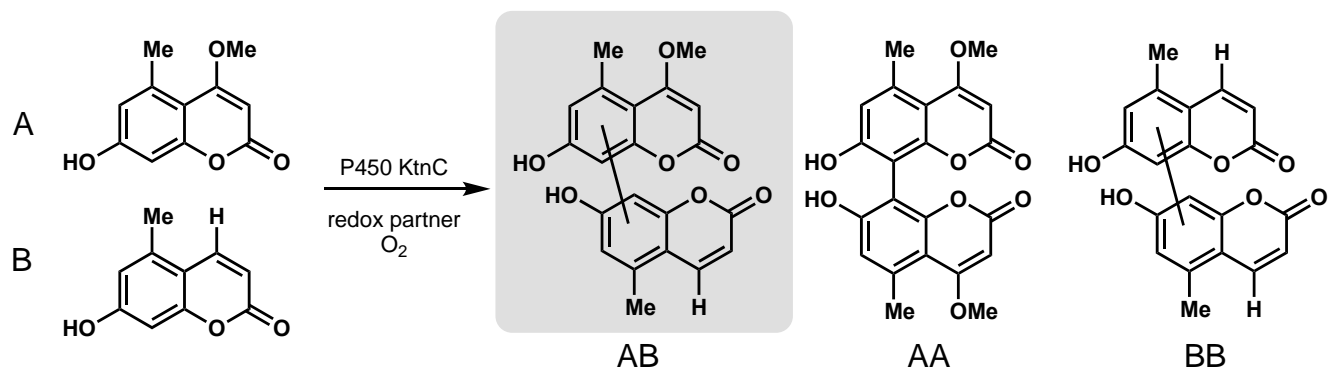

**KtnC**

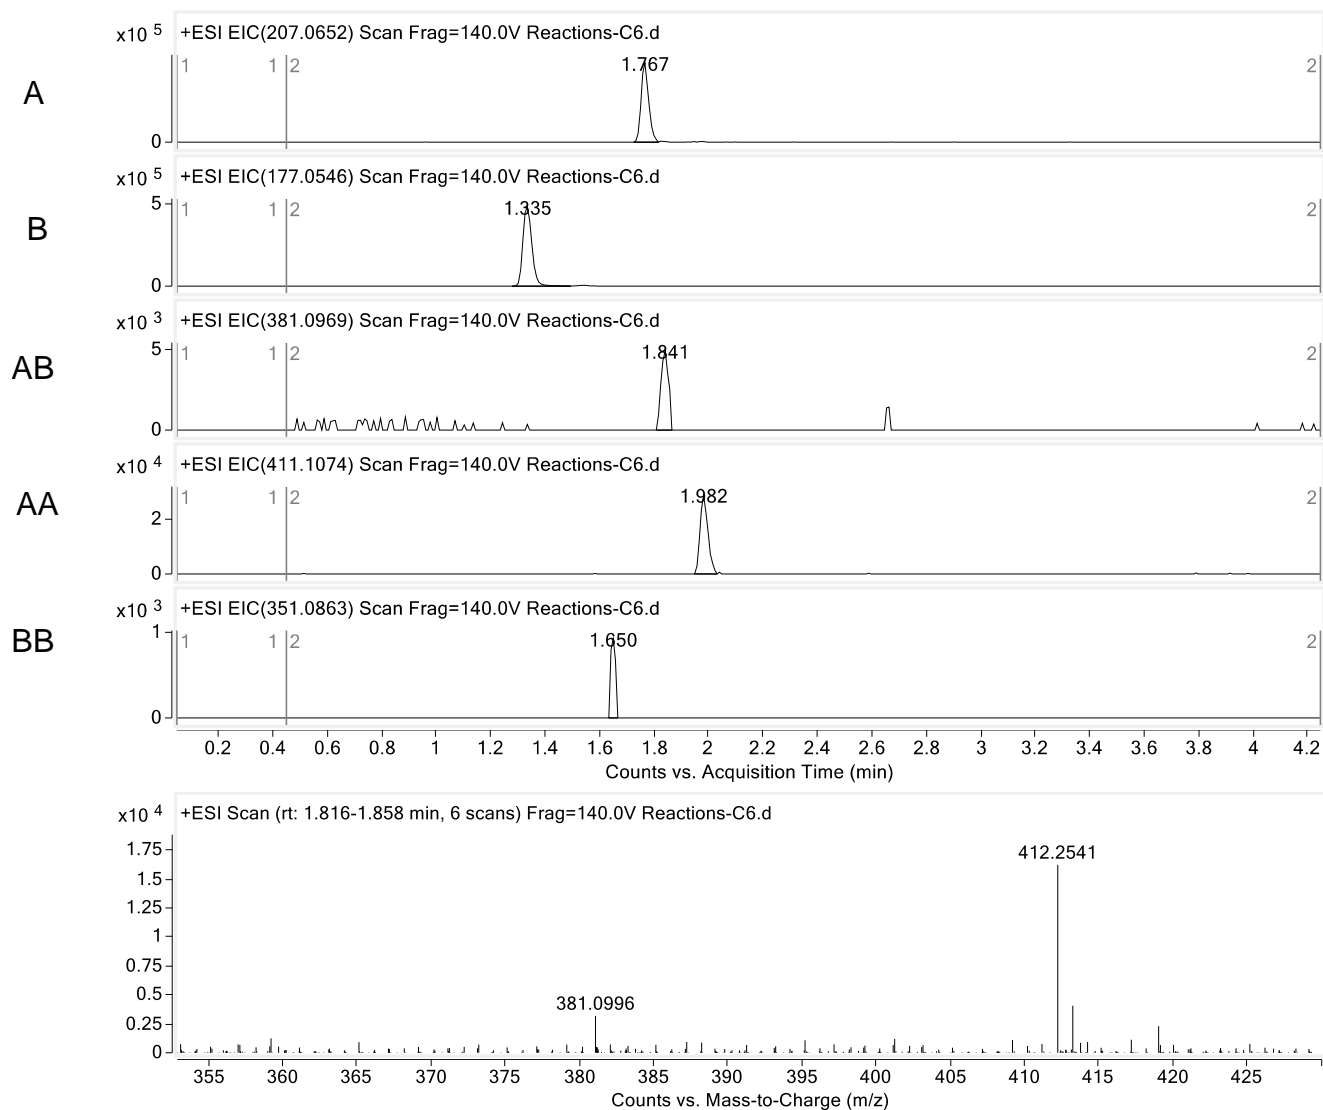

# No Enzyme control

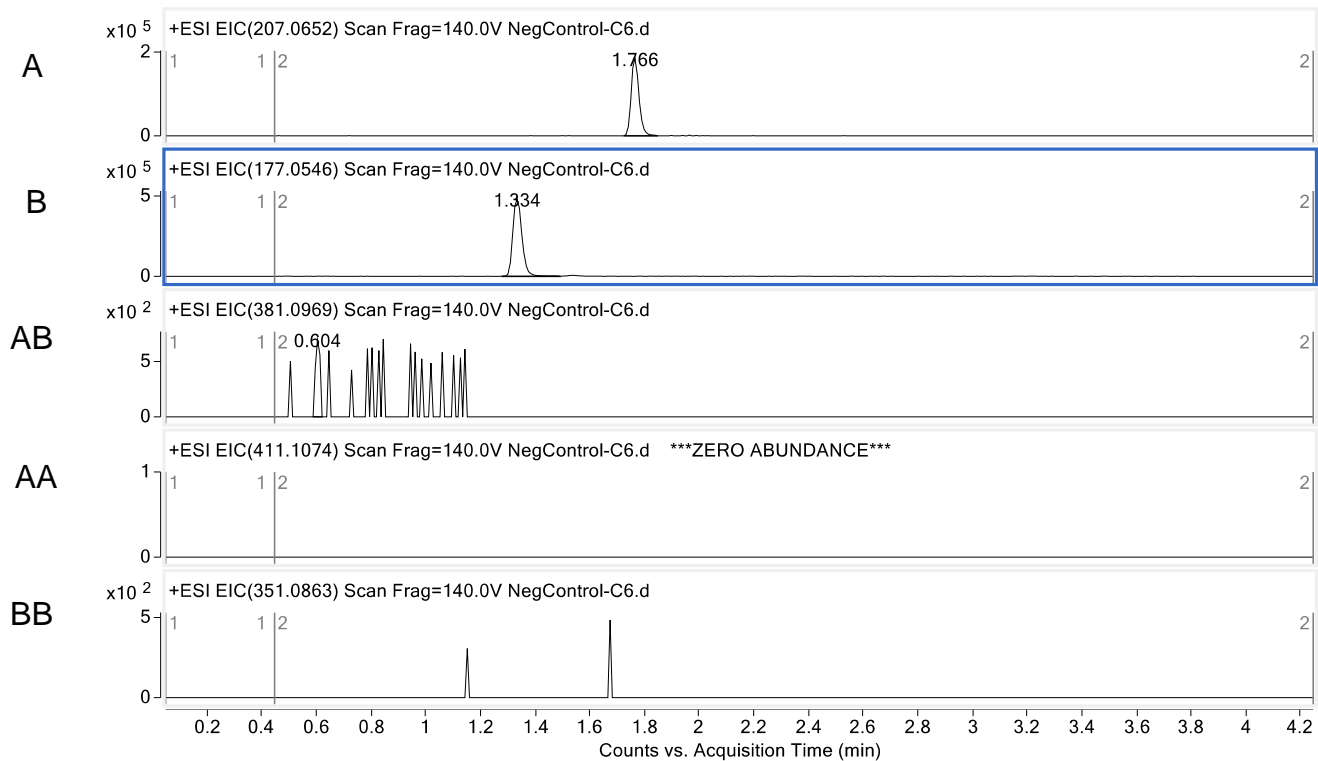

**Supplemental Figure S39.** Oxidative cross-coupling of **4** and **11** by KtnC (**Figure 2**).

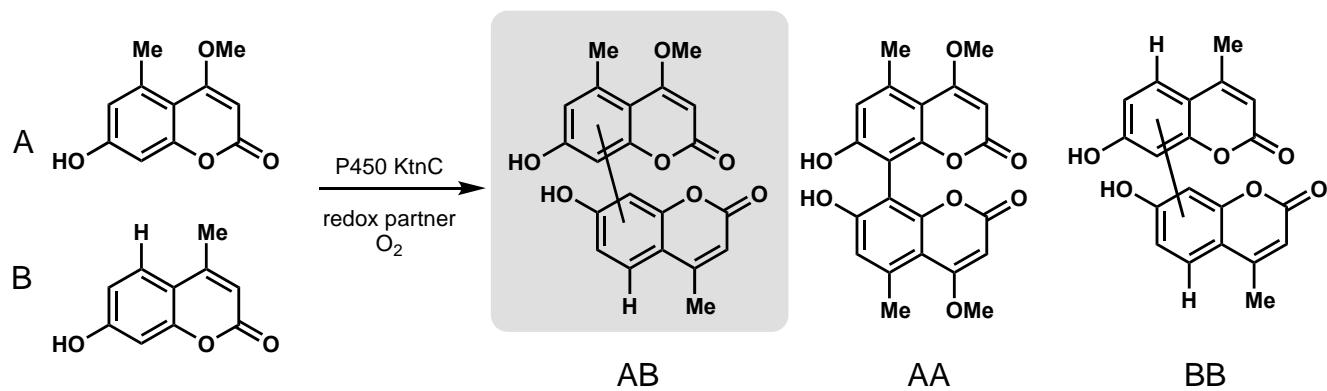

**KtnC**

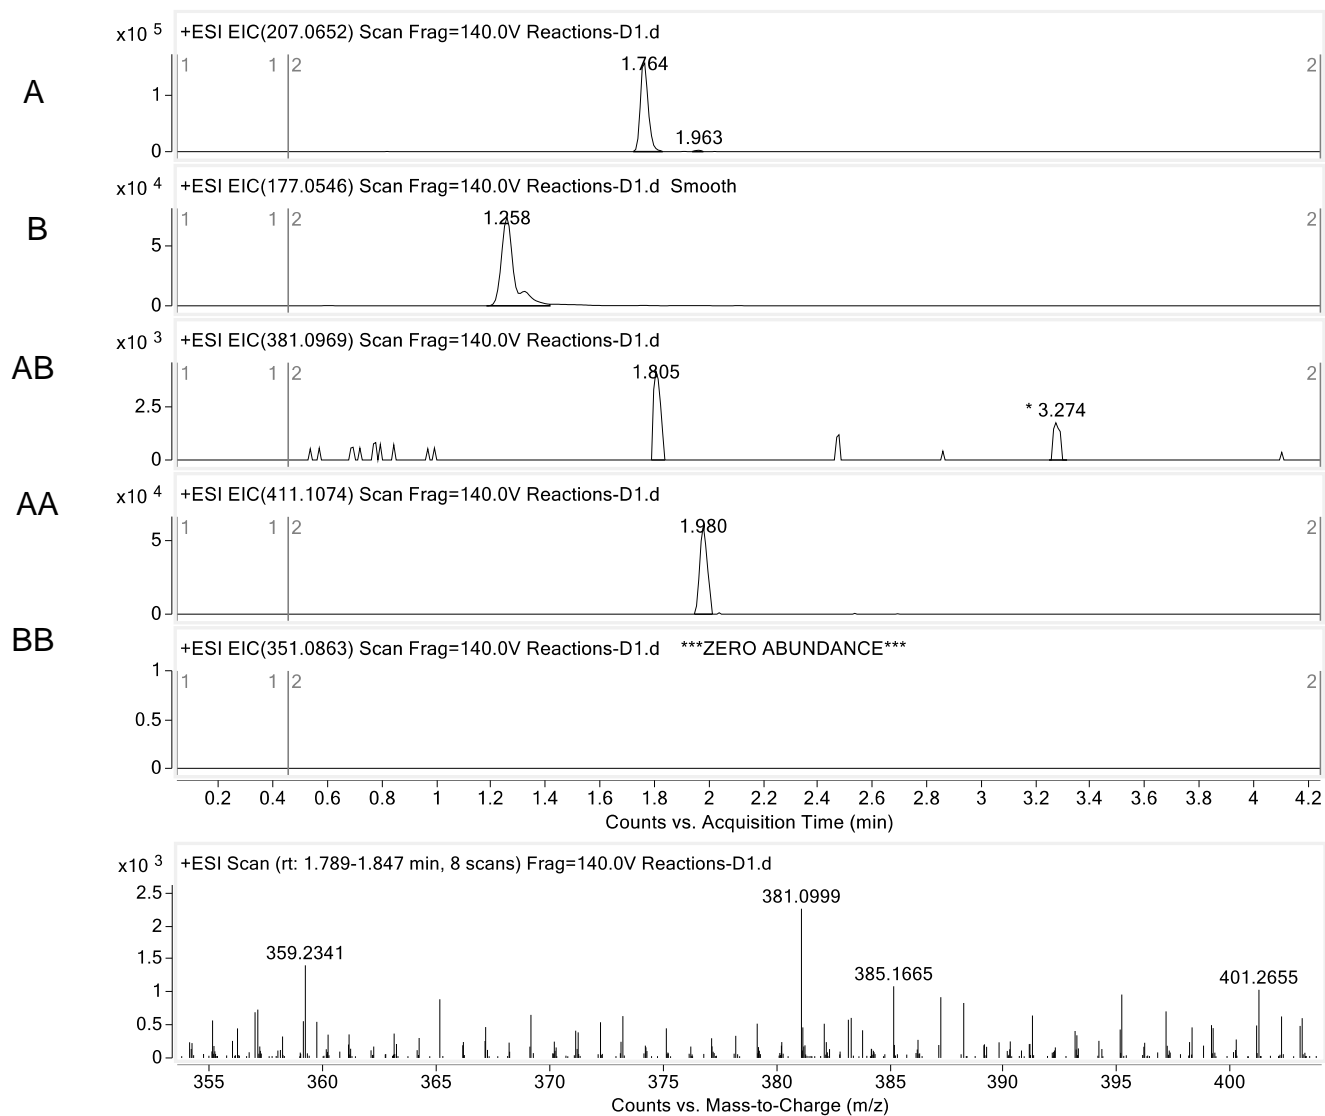

# No Enzyme control

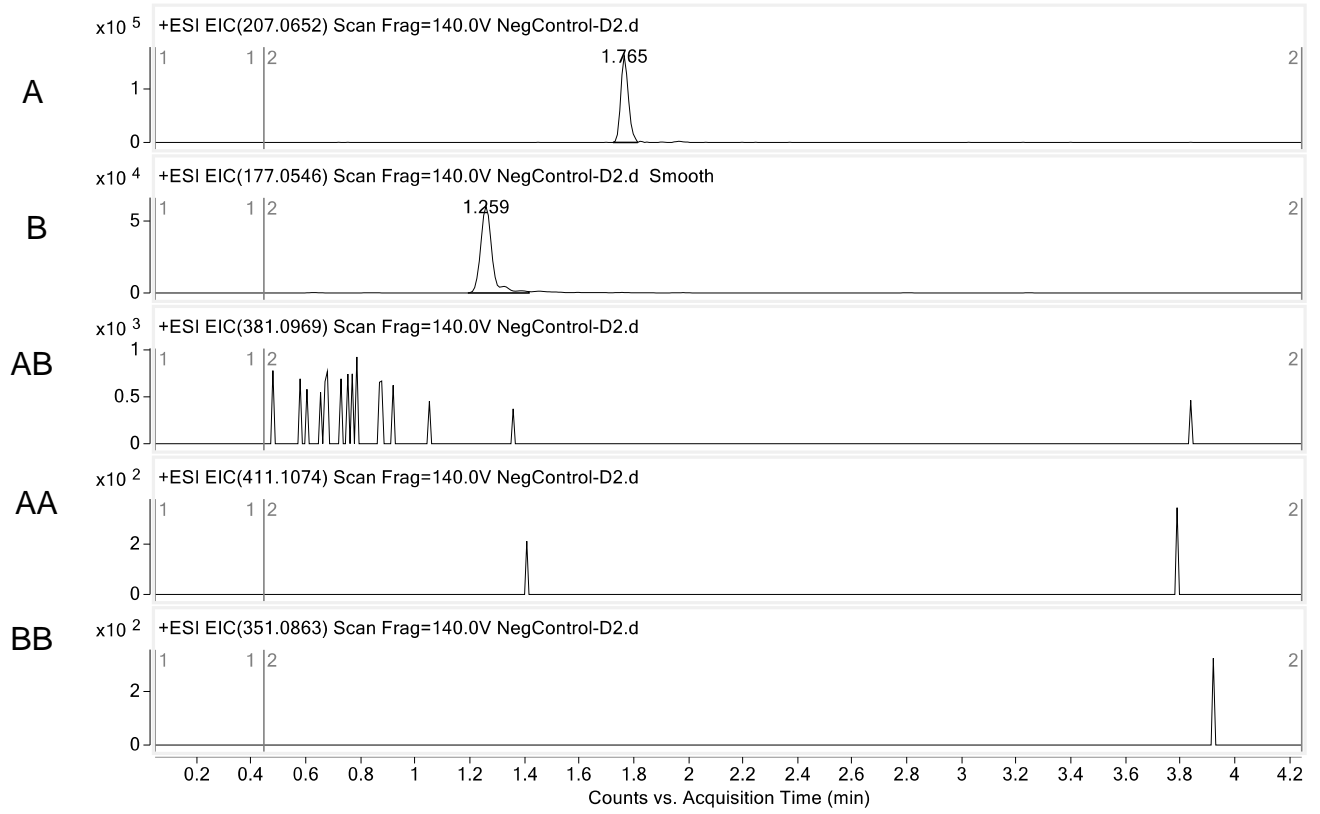

**Supplemental Figure S40.** Oxidative cross-coupling of **4** and **12** by KtnC (**Figure 2**).

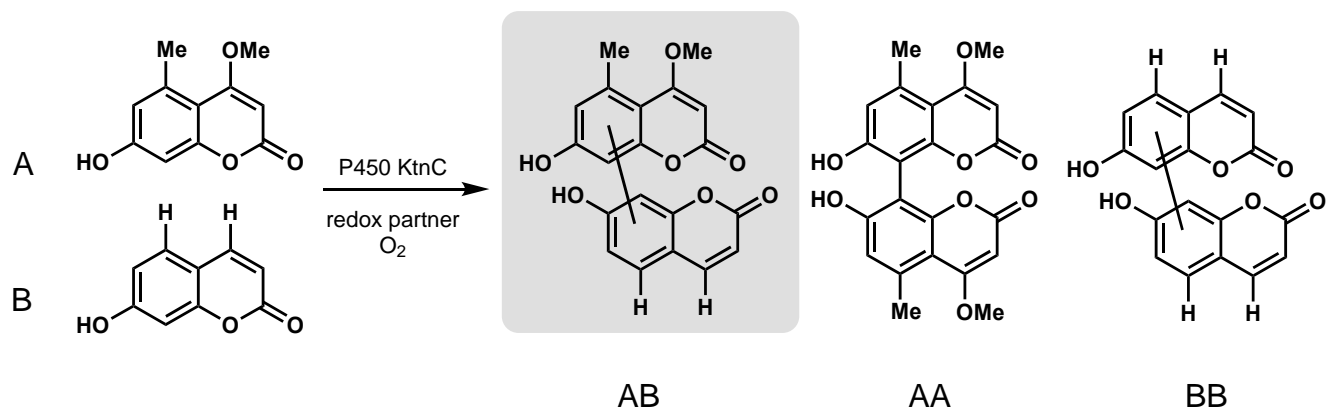

**KtnC**

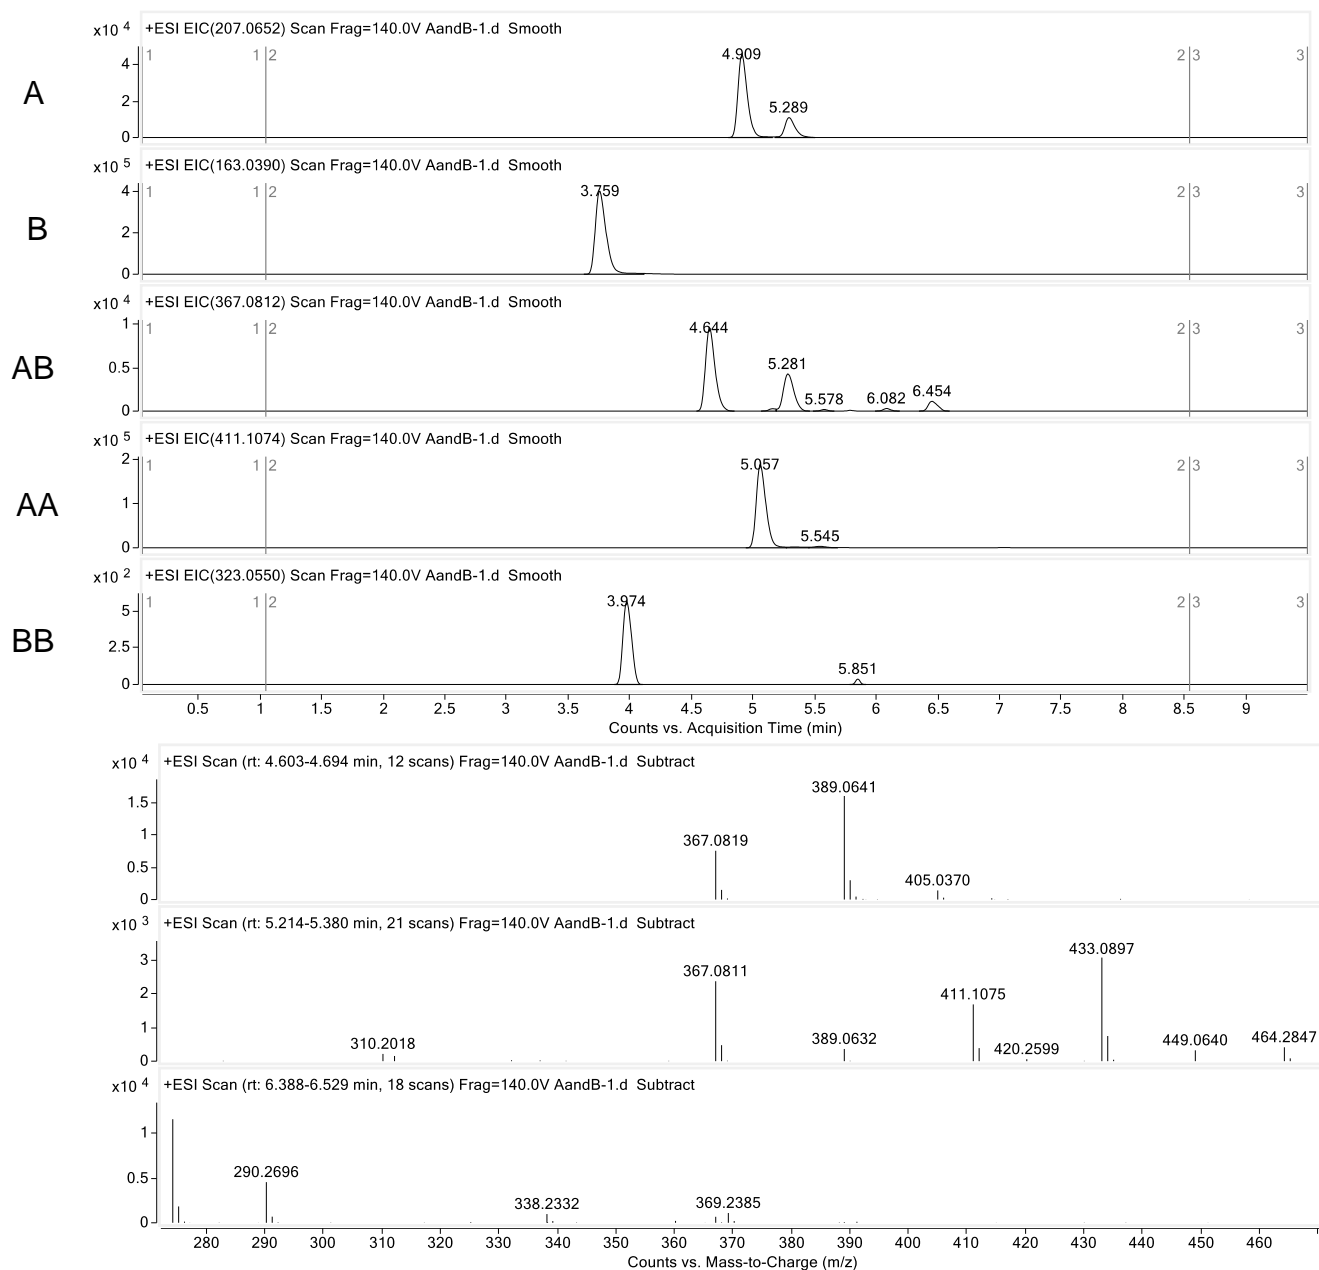

# No Enzyme control

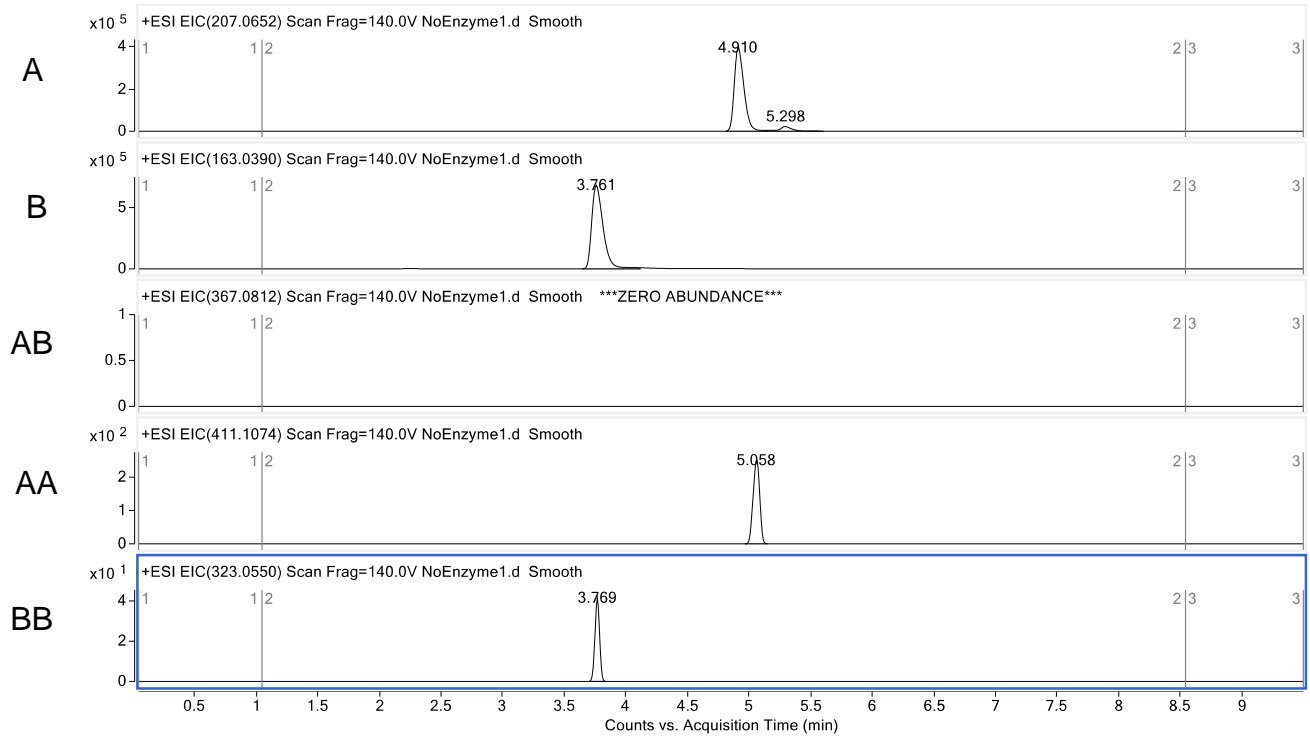

**Supplemental Figure S41. Oxidative cross-coupling of 4 and 13 by KtnC (Figure 2).**

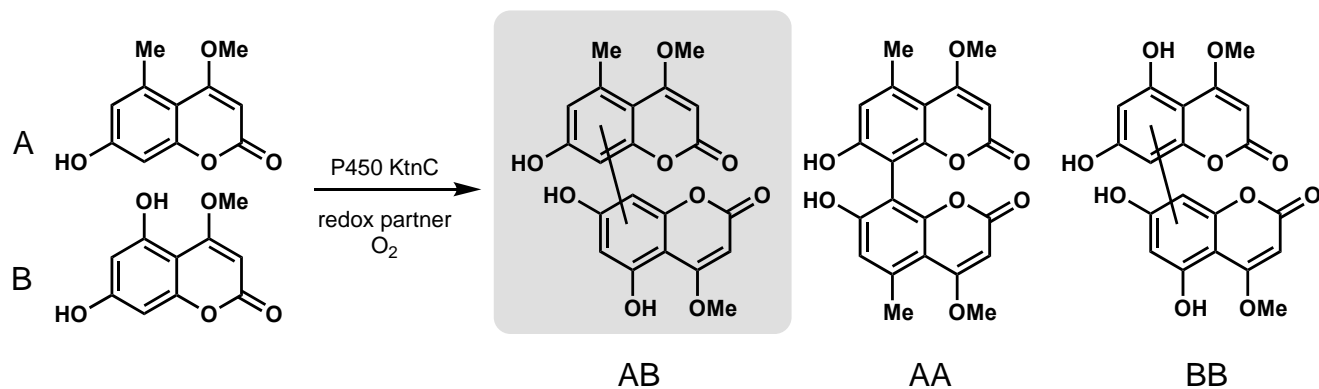

**KtnC**

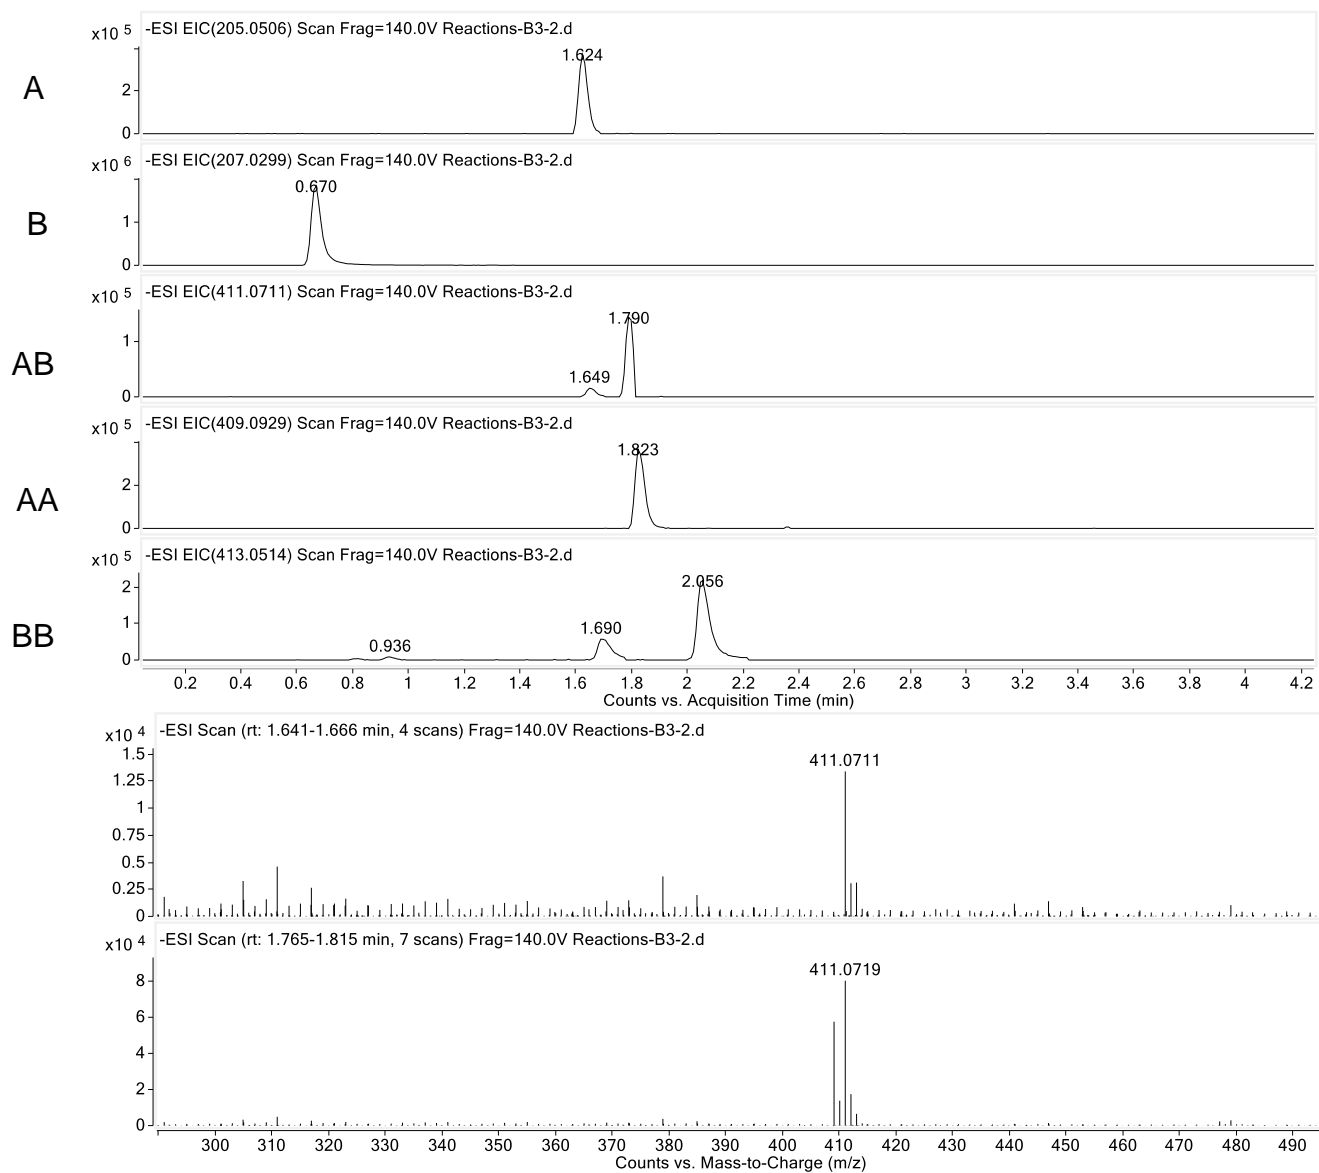

# No Enzyme control

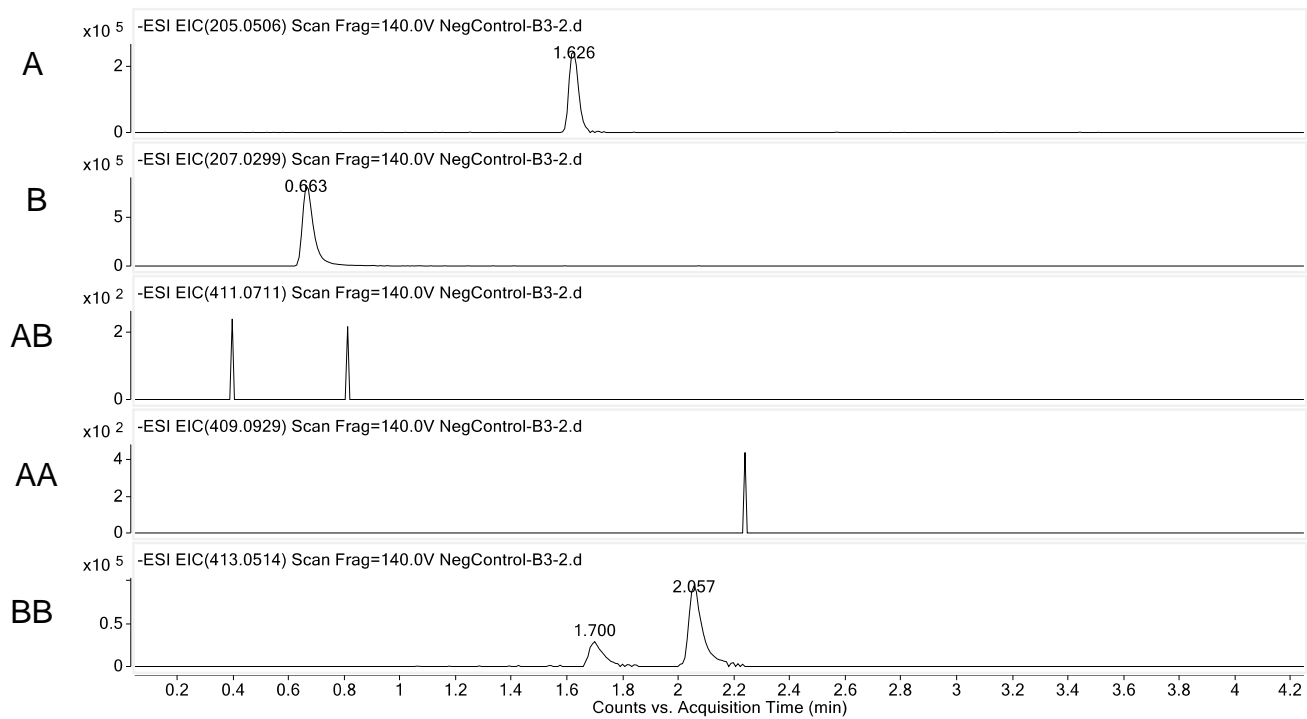



**Supplemental Figure S42.** Oxidative cross-coupling of **4** and **14** by KtnC (**Figure 2**).

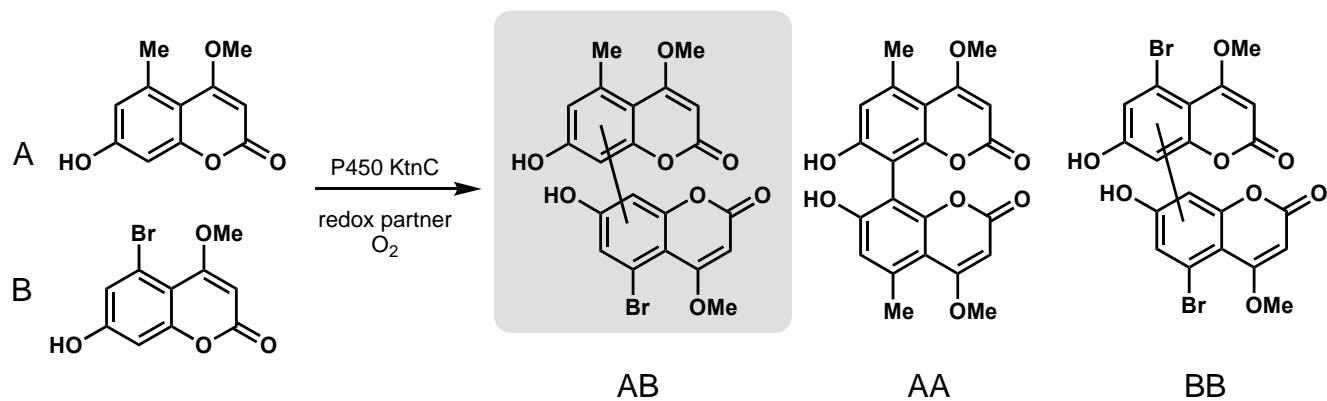

**KtnC**

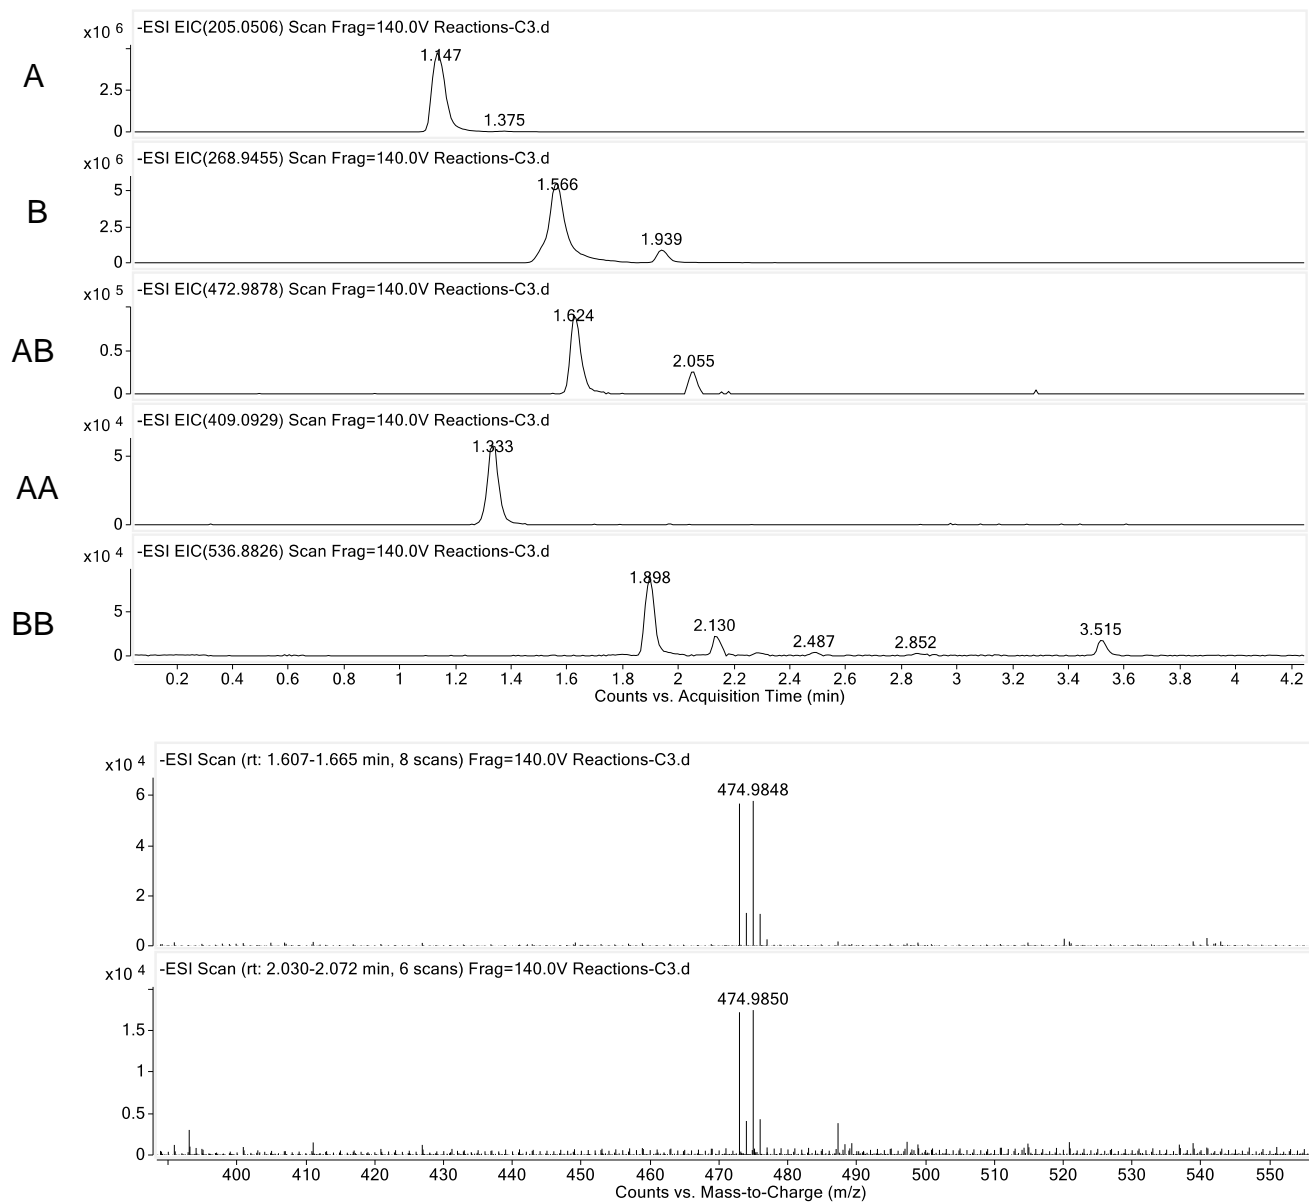

# No Enzyme control

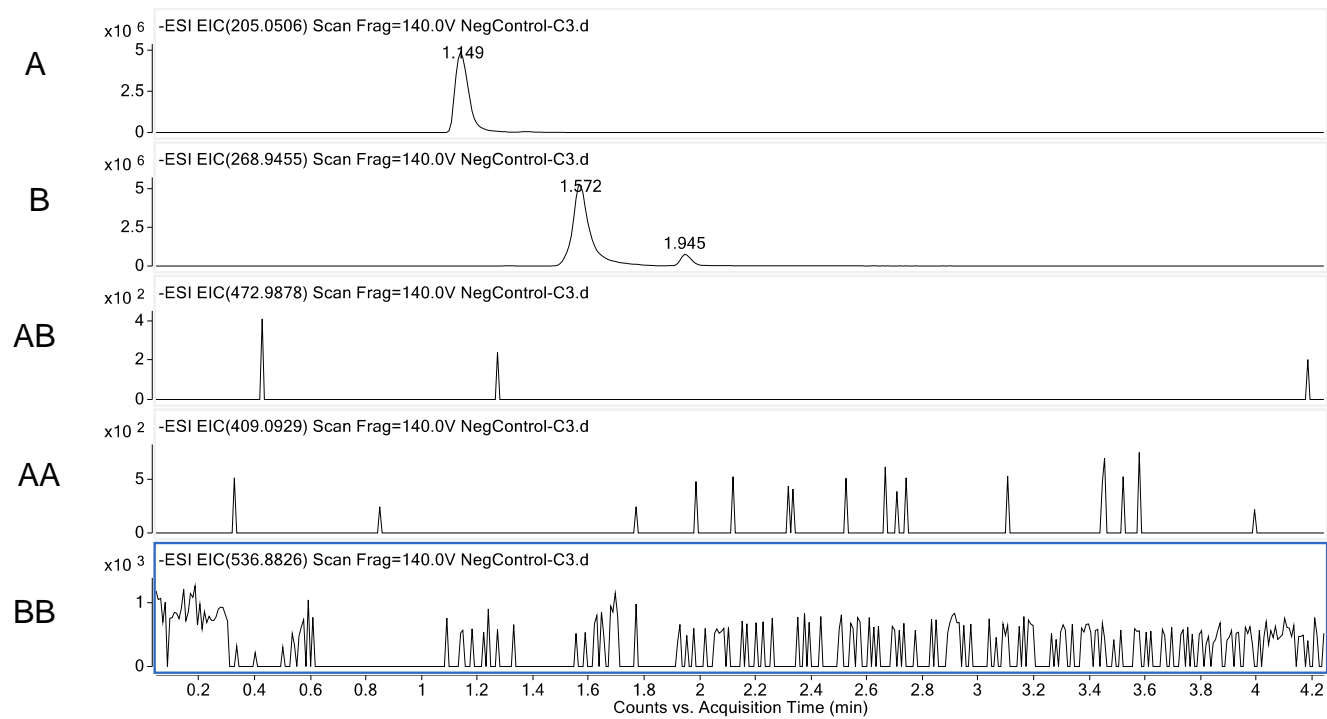

**Supplemental Figure S43. Oxidative cross-coupling of 4 and 15 by KtnC (Figure 2).**

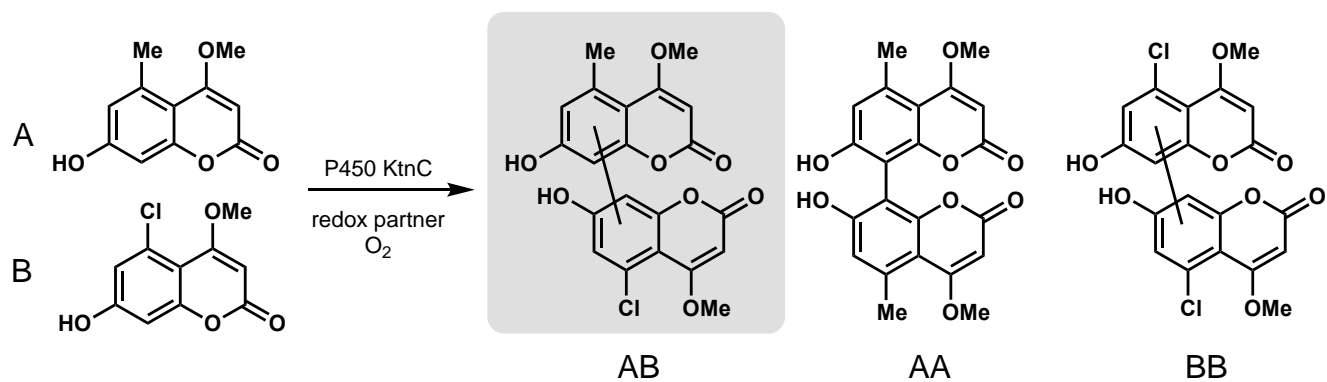

**KtnC**

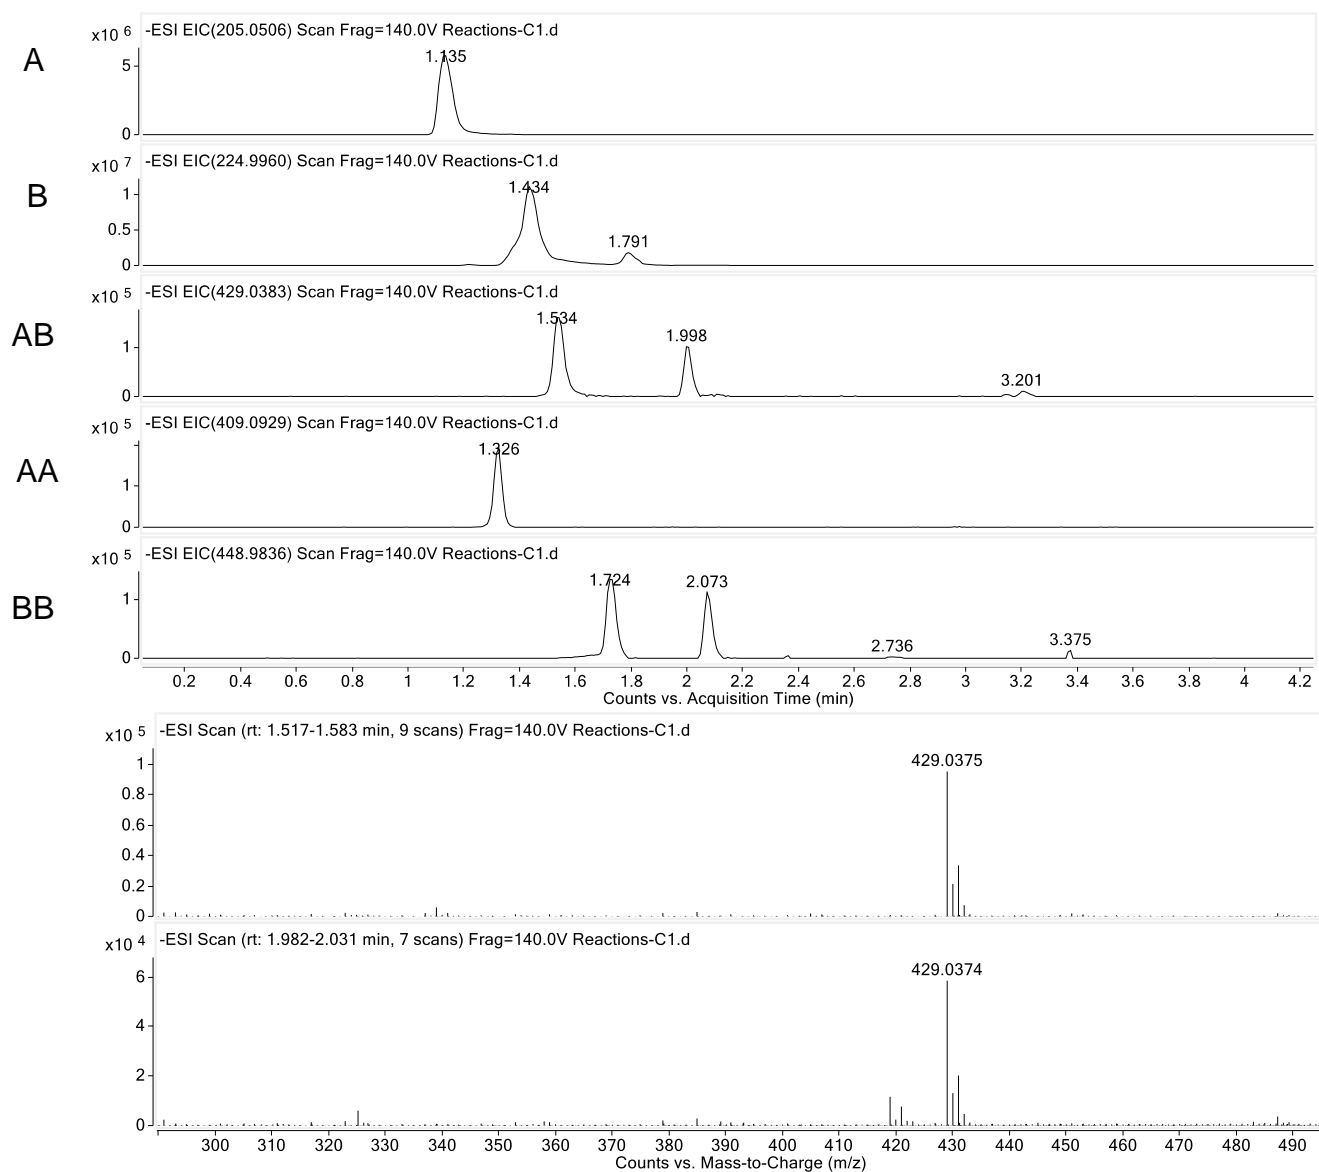

# No Enzyme control

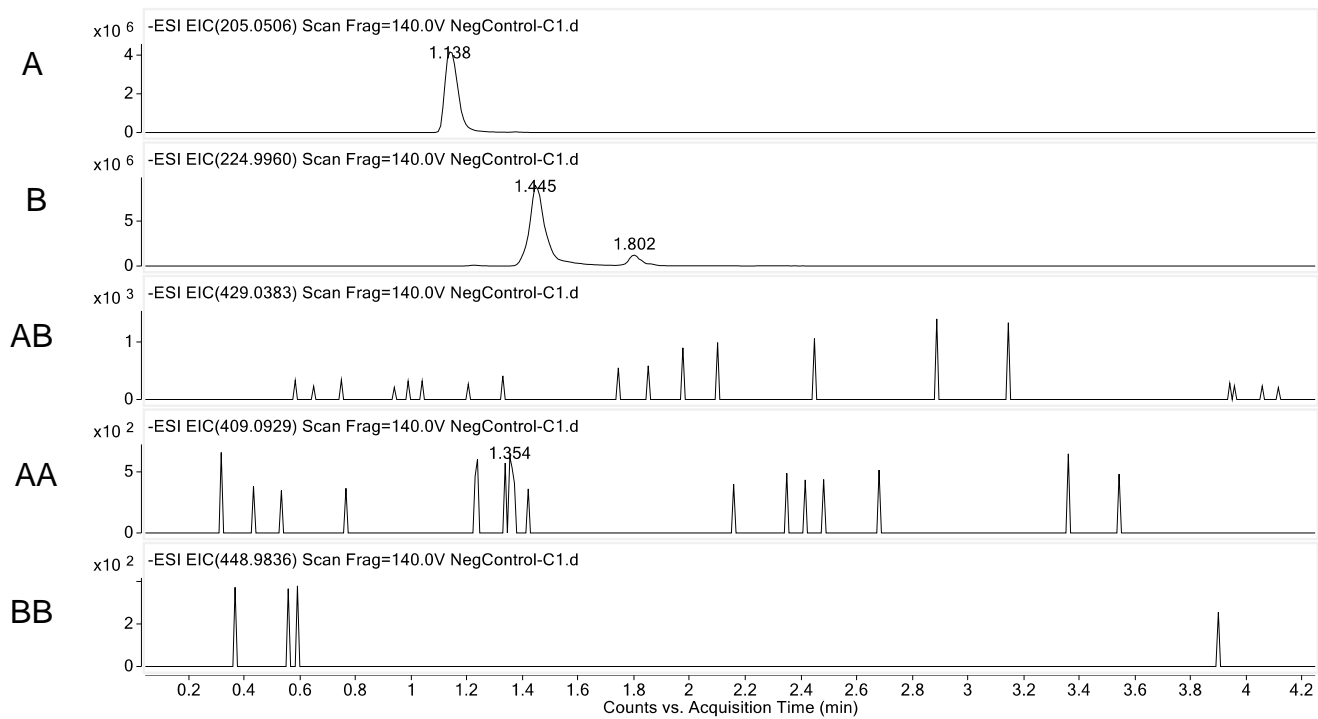

**Supplemental Figure S44.** Oxidative cross-coupling of **4** and **16** by KtnC (**Figure 2**).

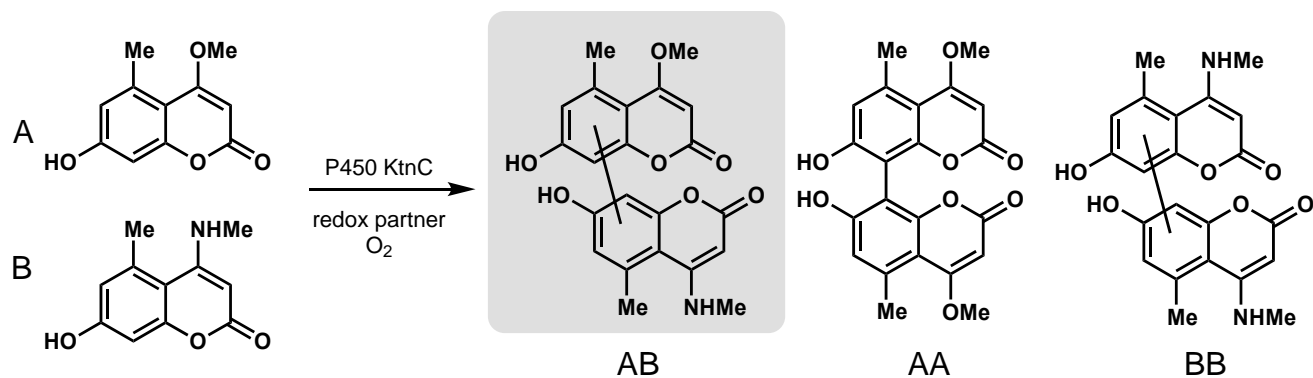

**KtnC**

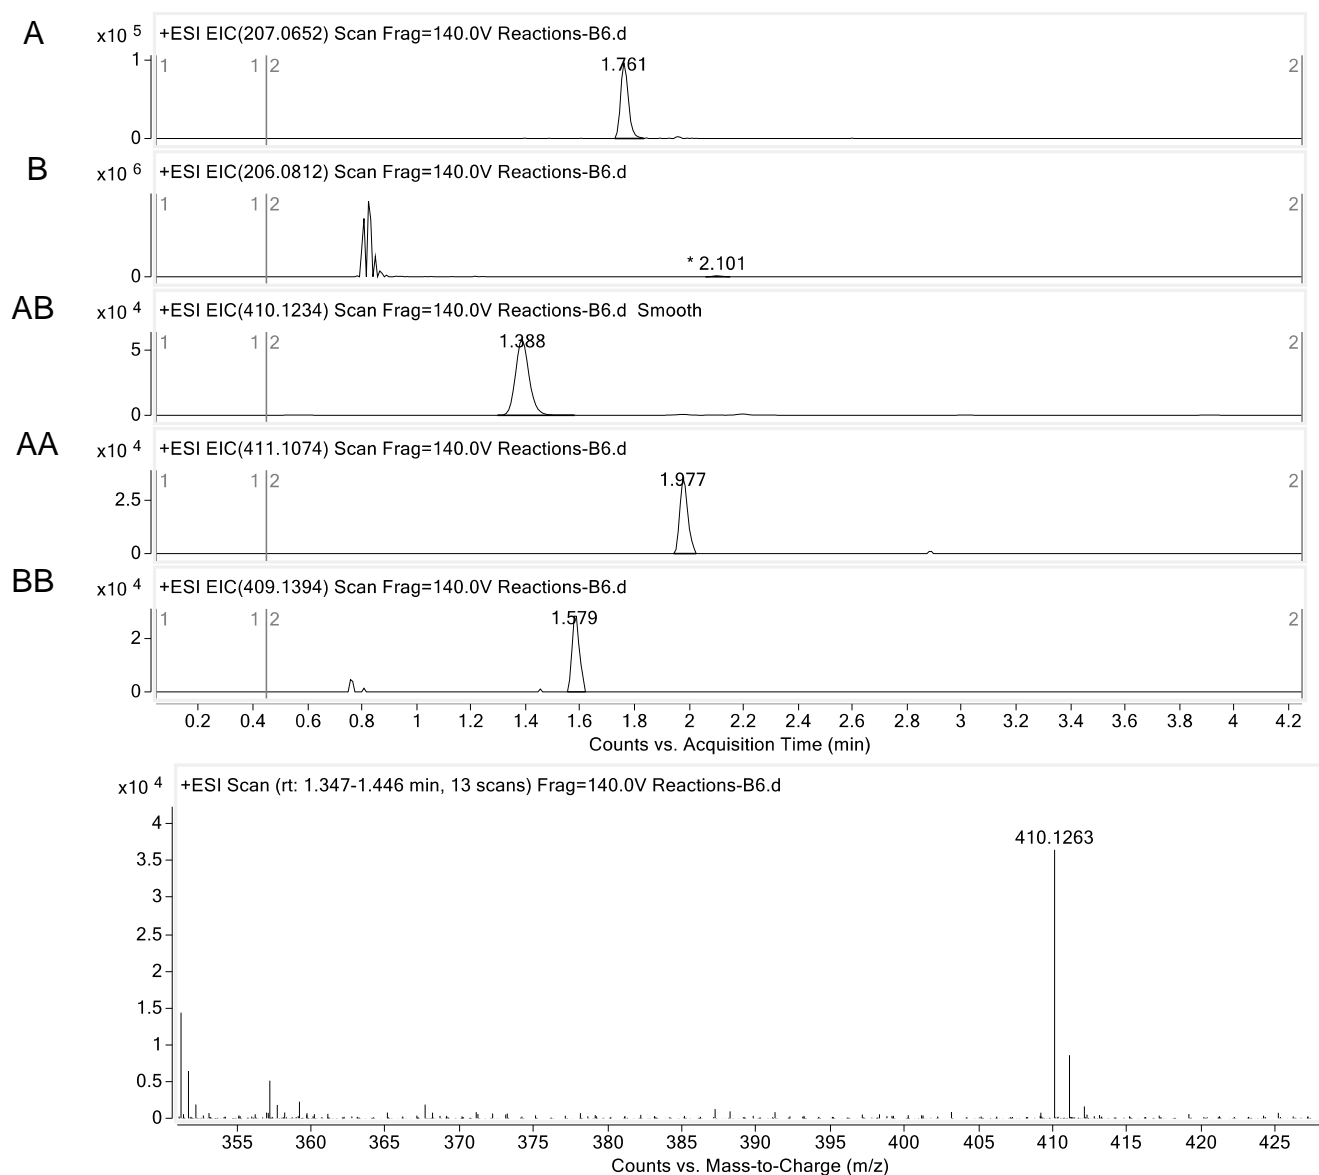

# No Enzyme control

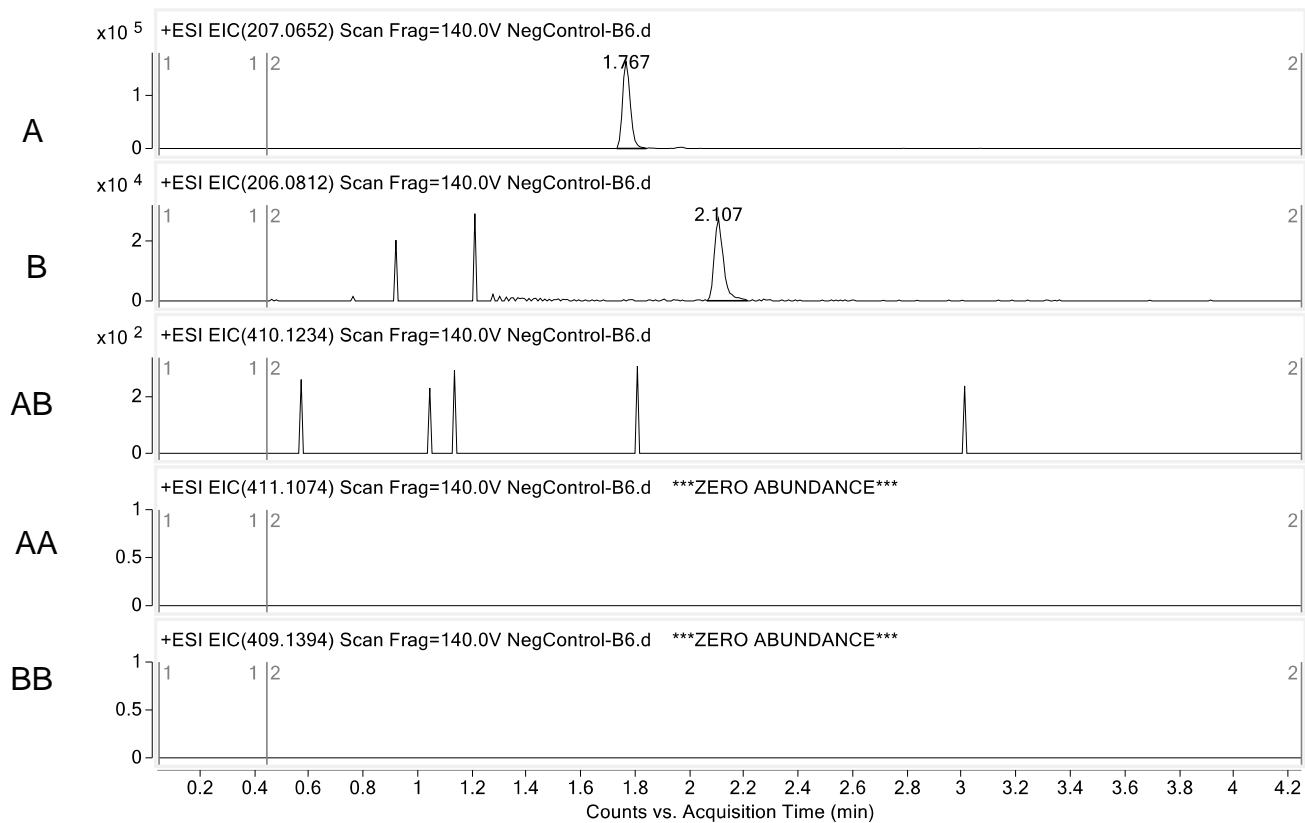

**Supplemental Figure S45.** Oxidative cross-coupling of **4** and **17** by KtnC (**Figure 2**).

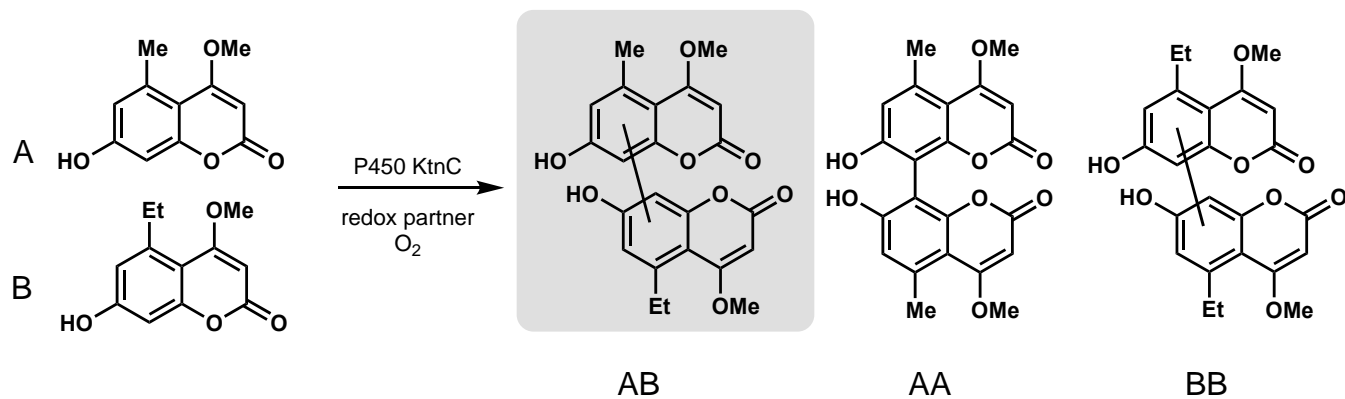

**KtnC**

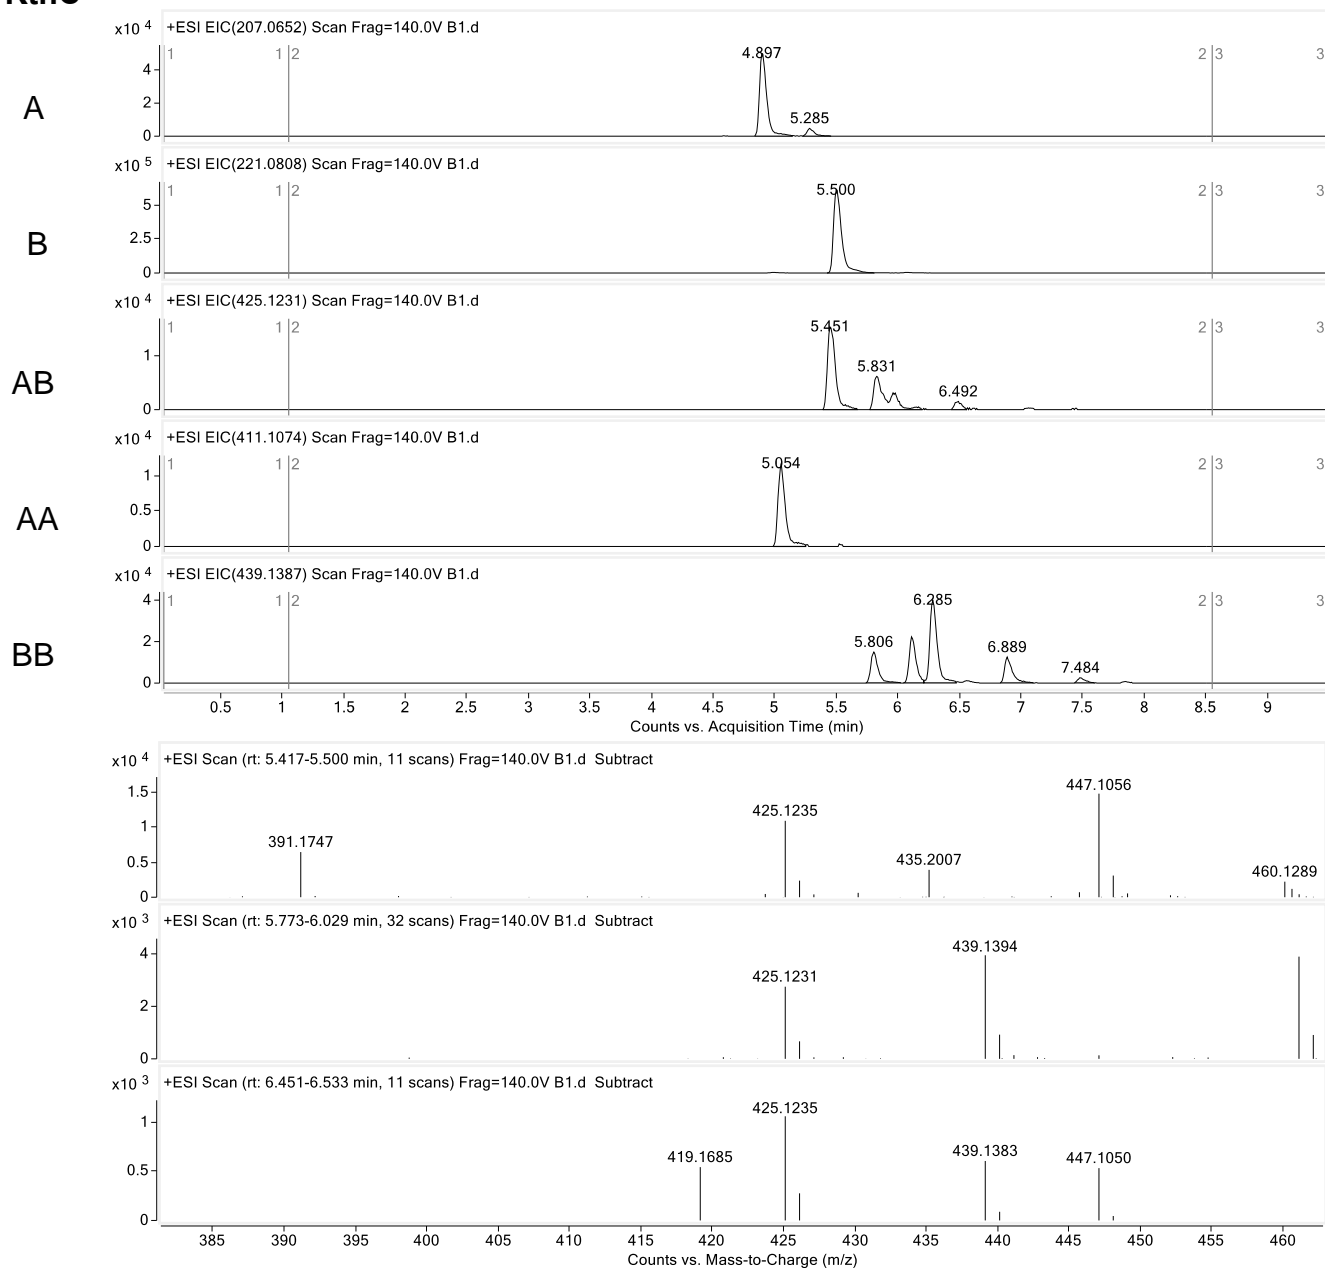

# No Enzyme control

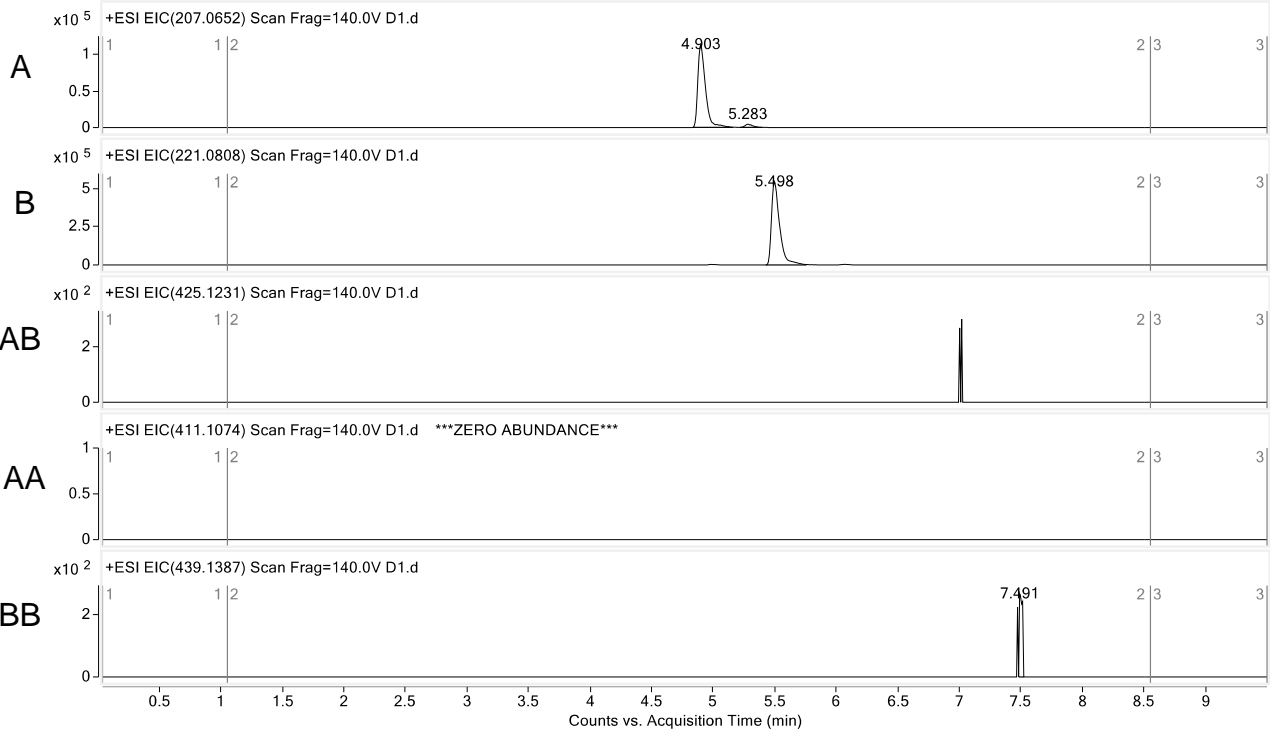



**Supplemental Figure S46.** Oxidative cross-coupling of **4** and **18** by KtnC (**Figure 2**).

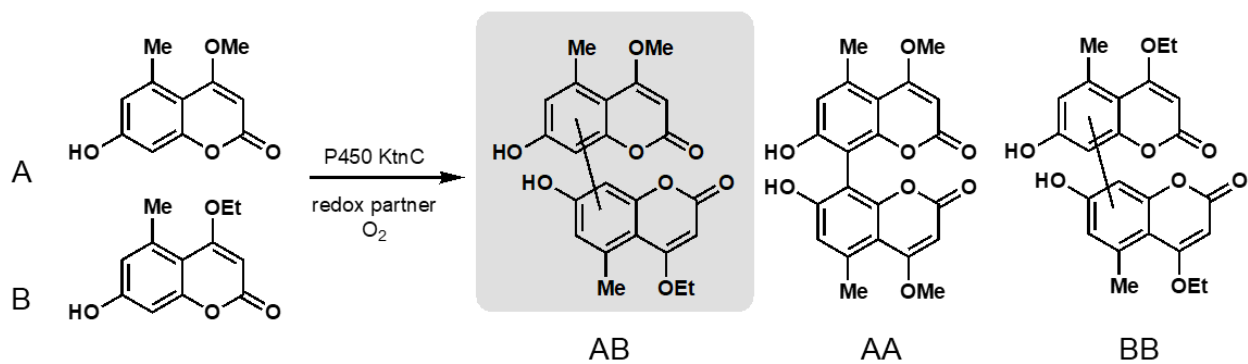

**KtnC**

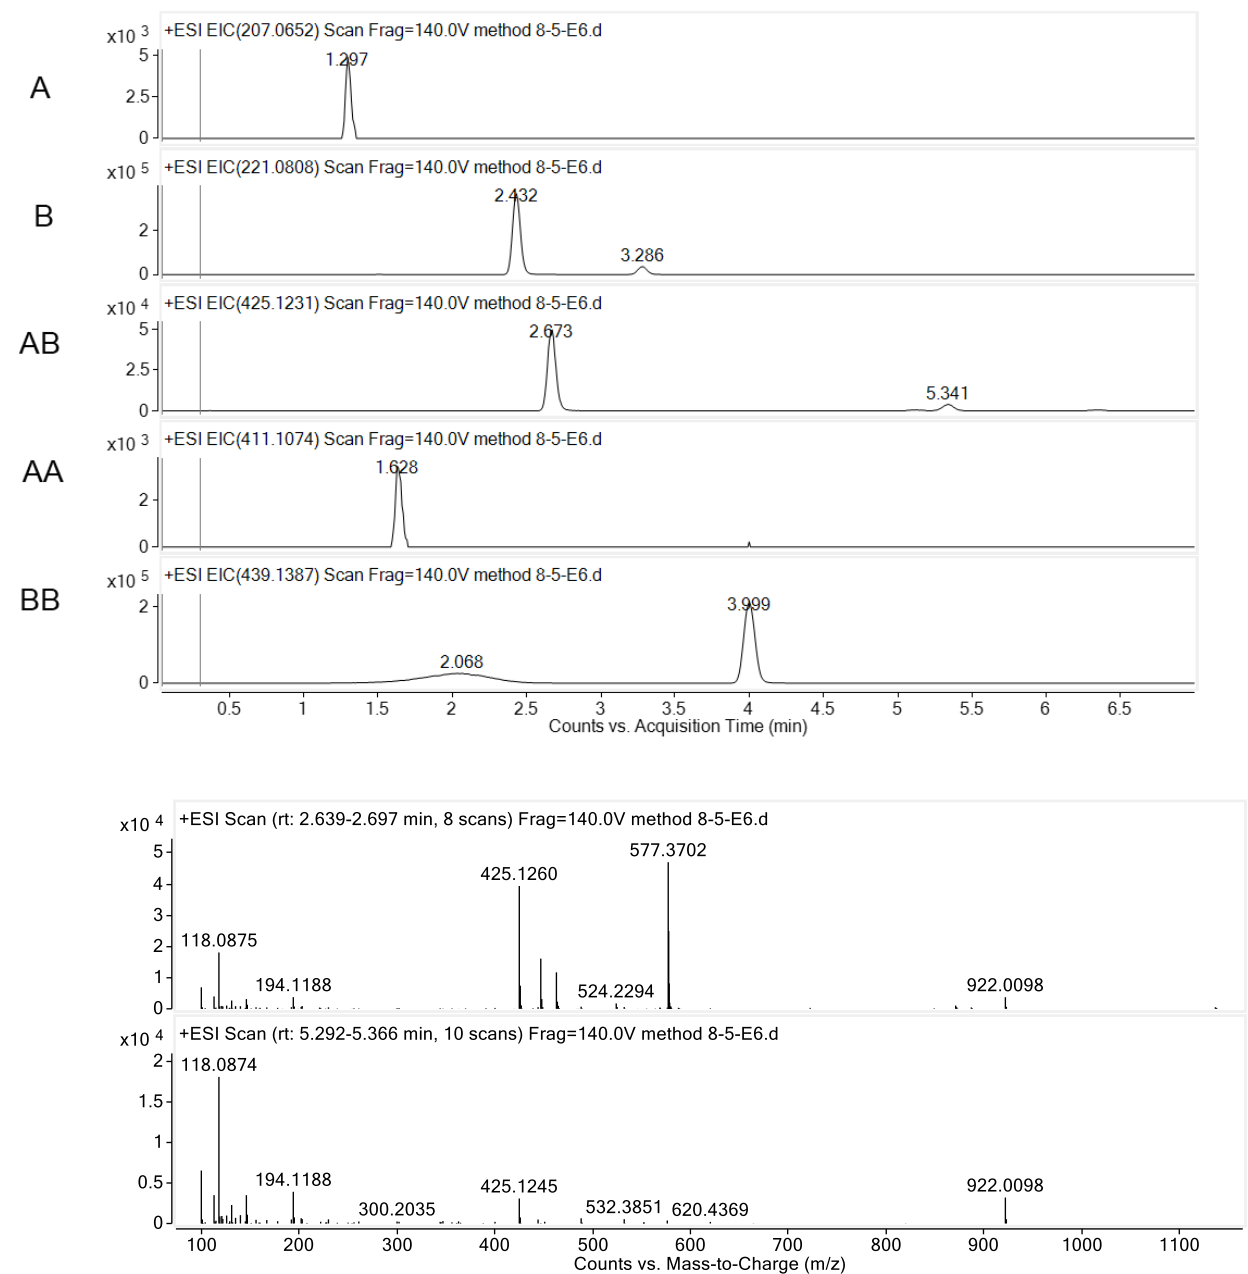

# No Enzyme control

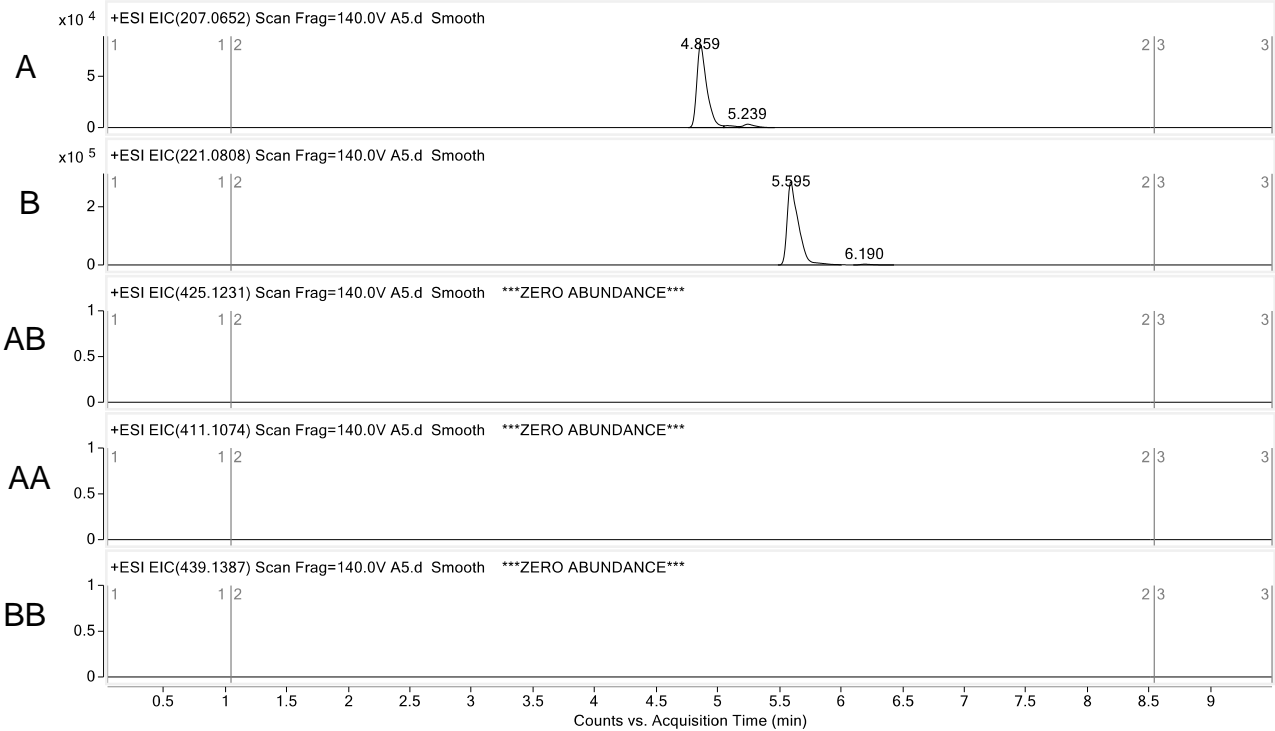

**Supplemental Figure S47. Oxidative cross-coupling of 4 and 19 by KtnC (Figure 2).**

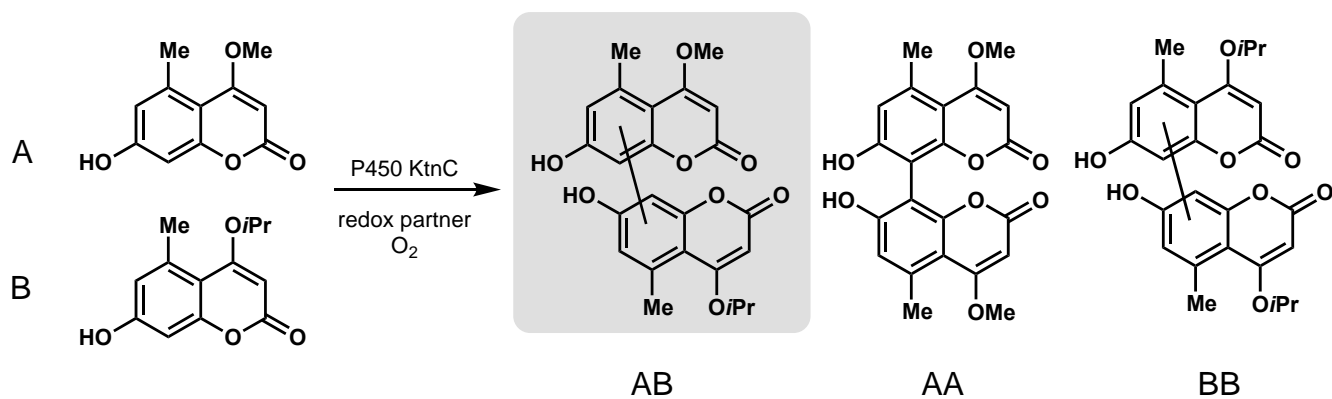

**KtnC**

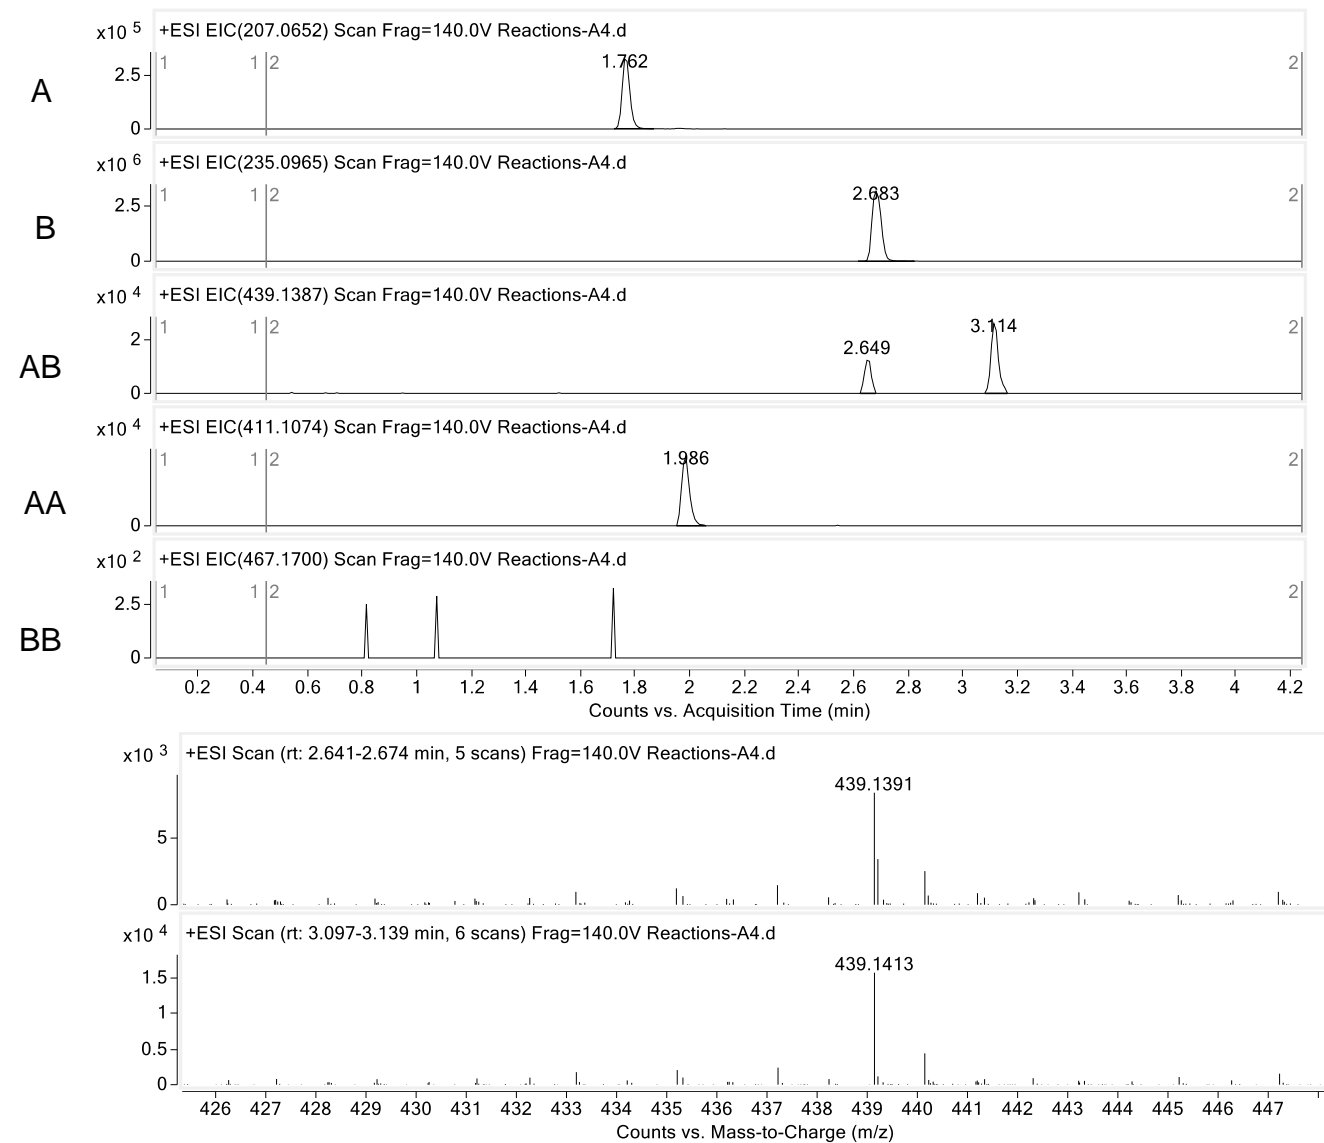

# No Enzyme control

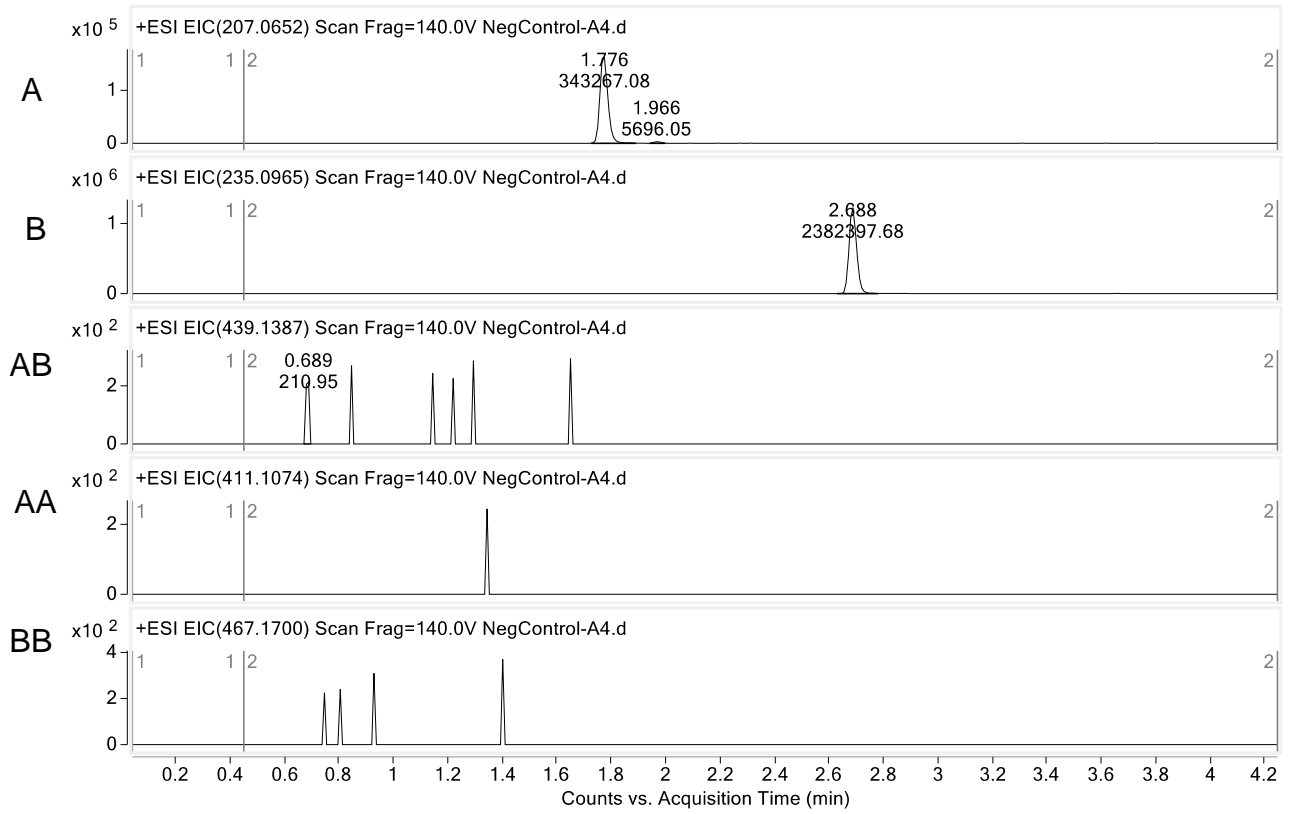

**Supplemental Figure S48.** Oxidative cross-coupling of **4** and **20** by KtnC (**Figure 2**).

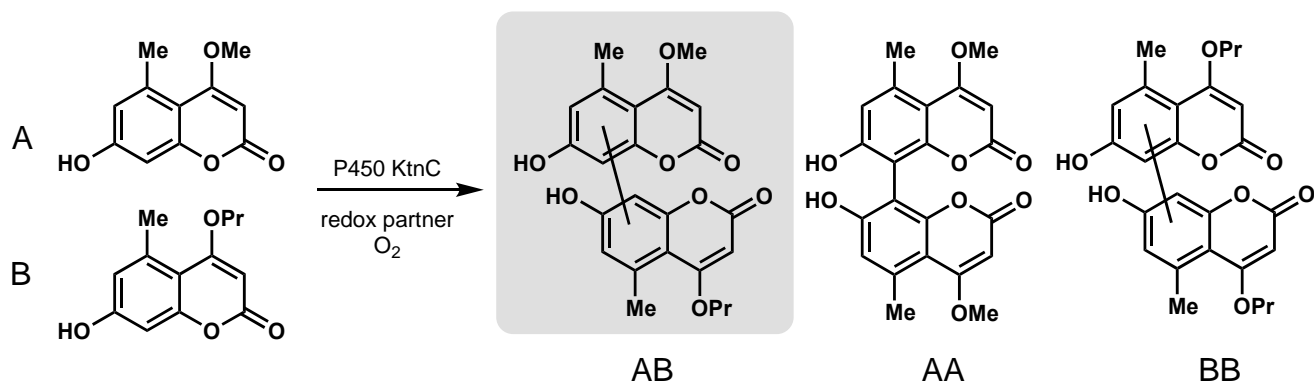

**KtnC**

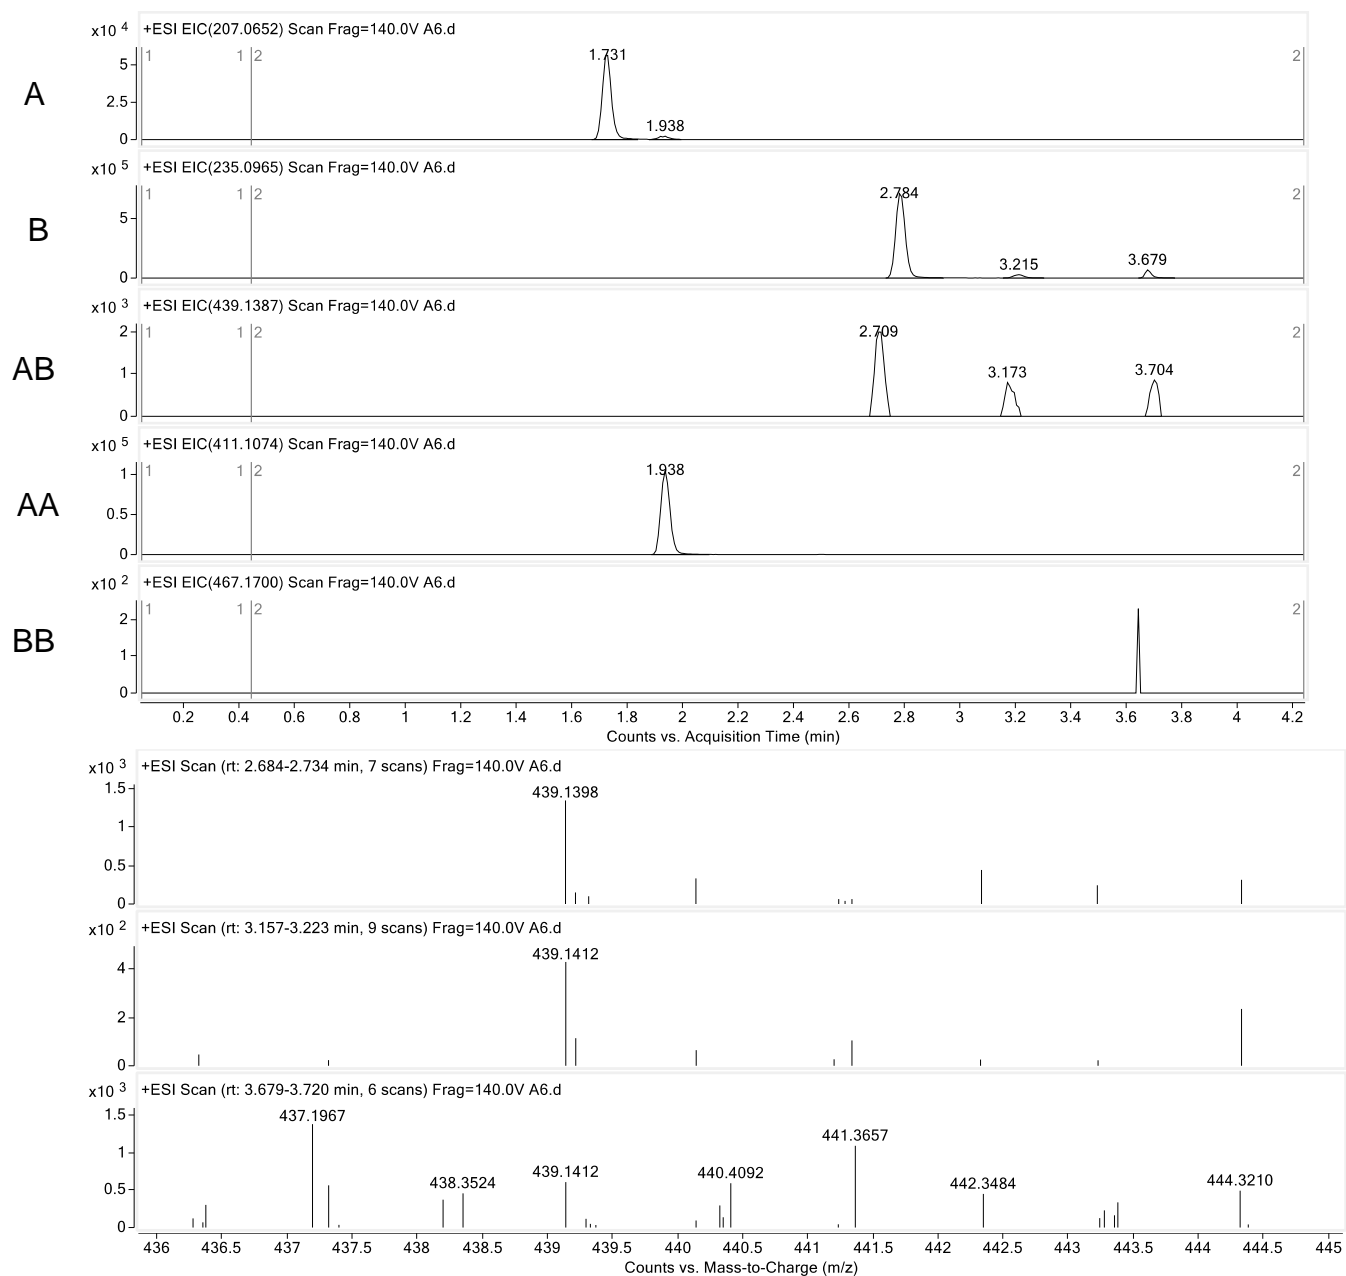

# No Enzyme control

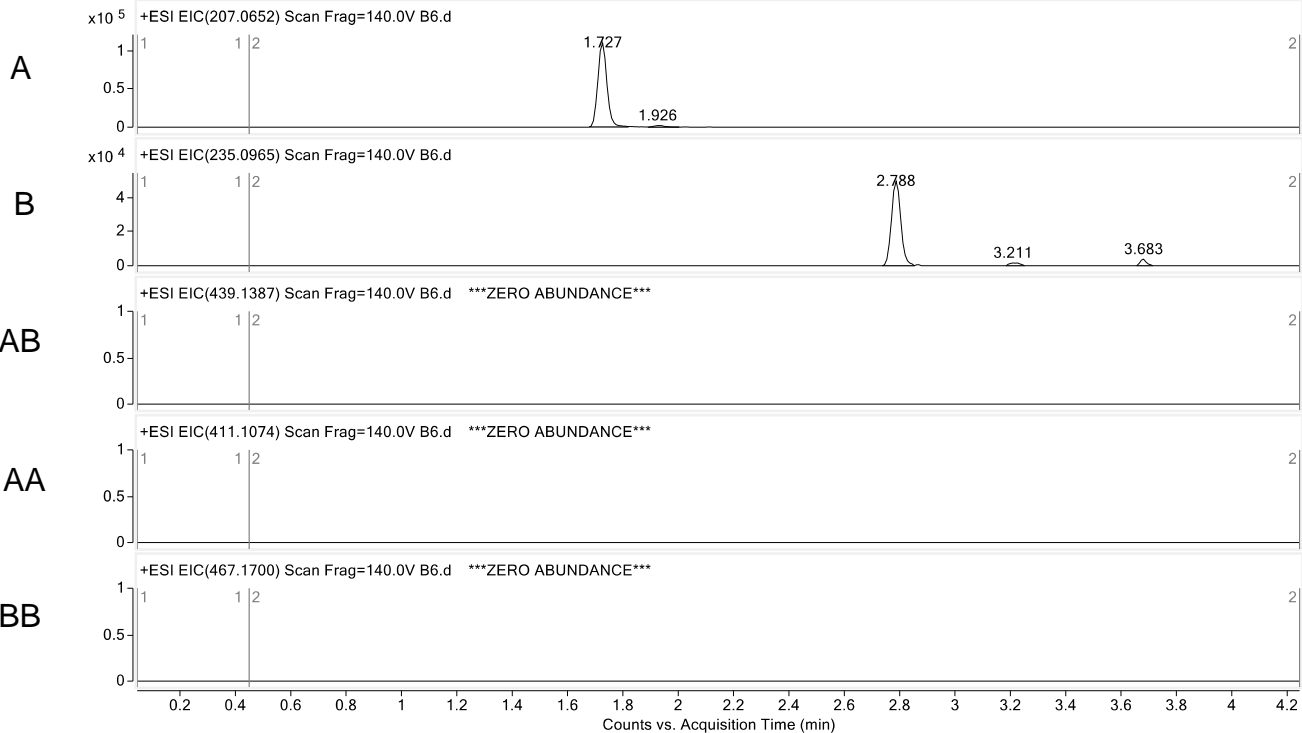

**Supplemental Figure S49.** Oxidative cross-coupling of **4** and **21** by KtnC (**Figure 2**).

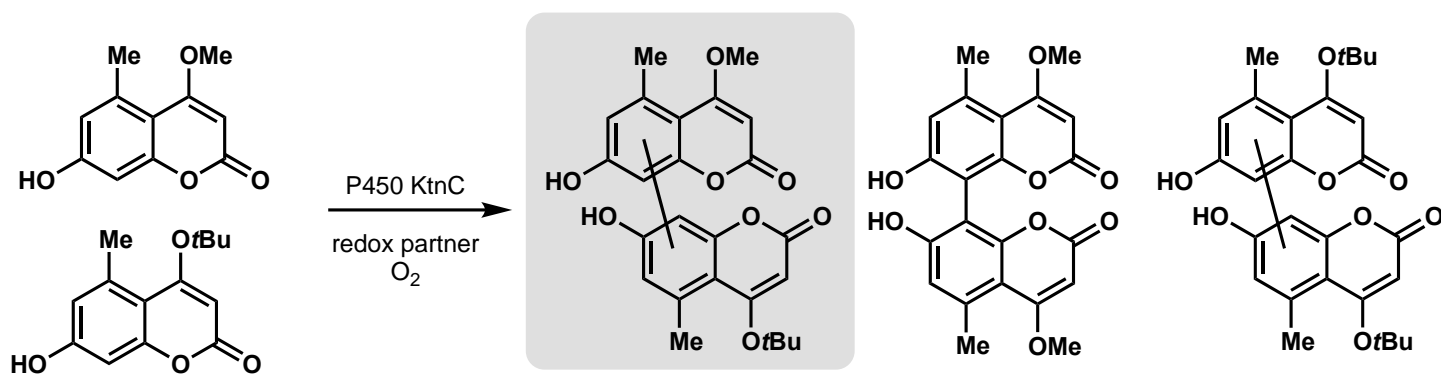

**KtnC**

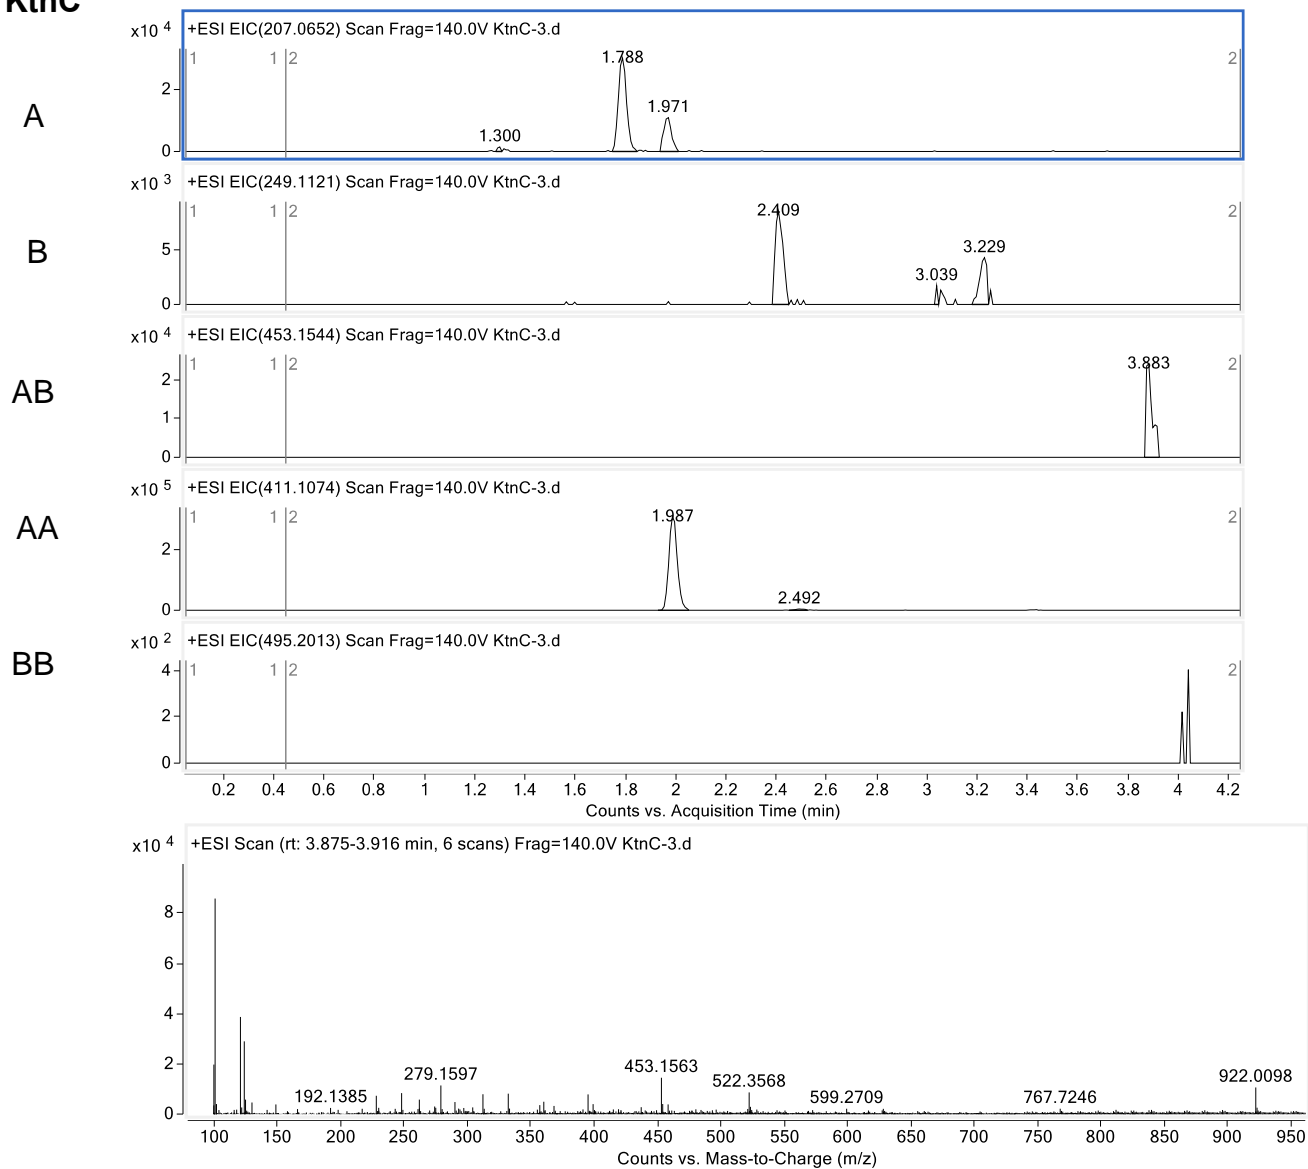

# No Enzyme control

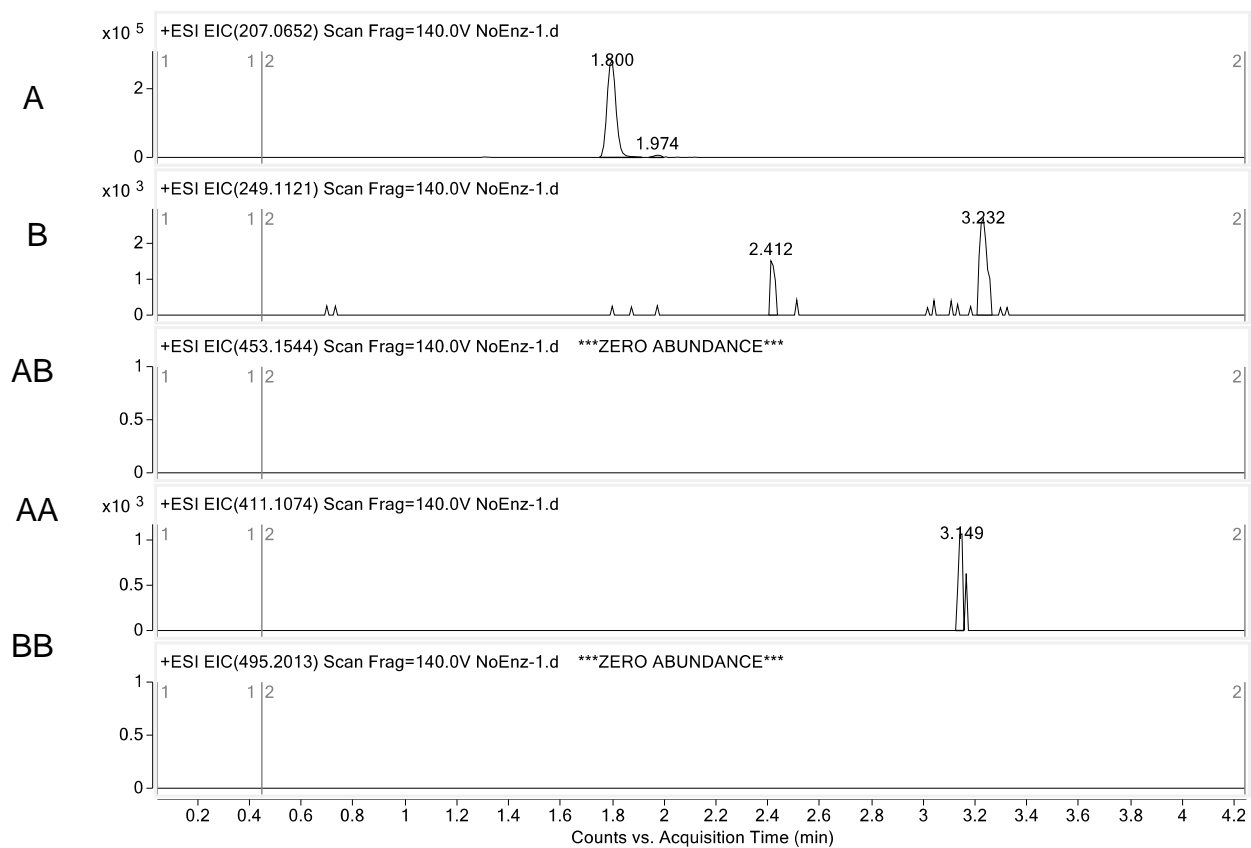



**Supplemental Figure S50.** Oxidative cross-coupling of **4** and **22** by KtnC (**Figure 2**).

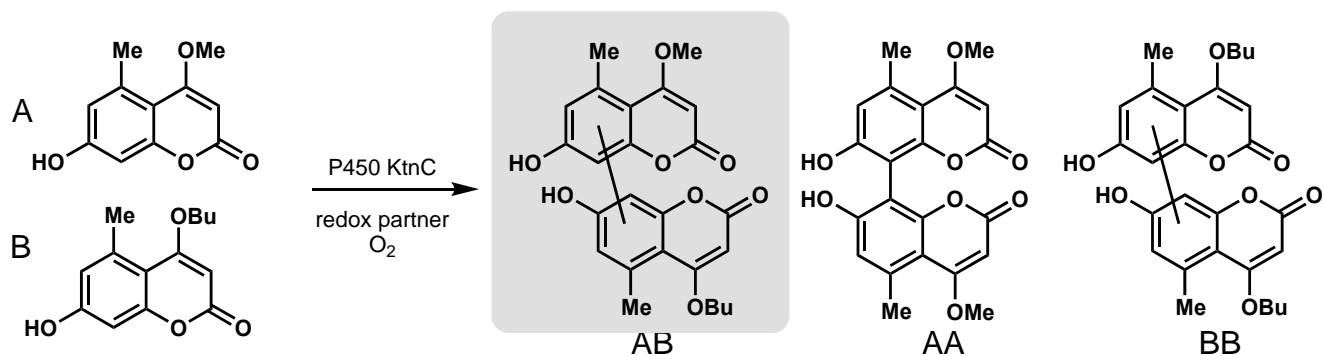

**KtnC**

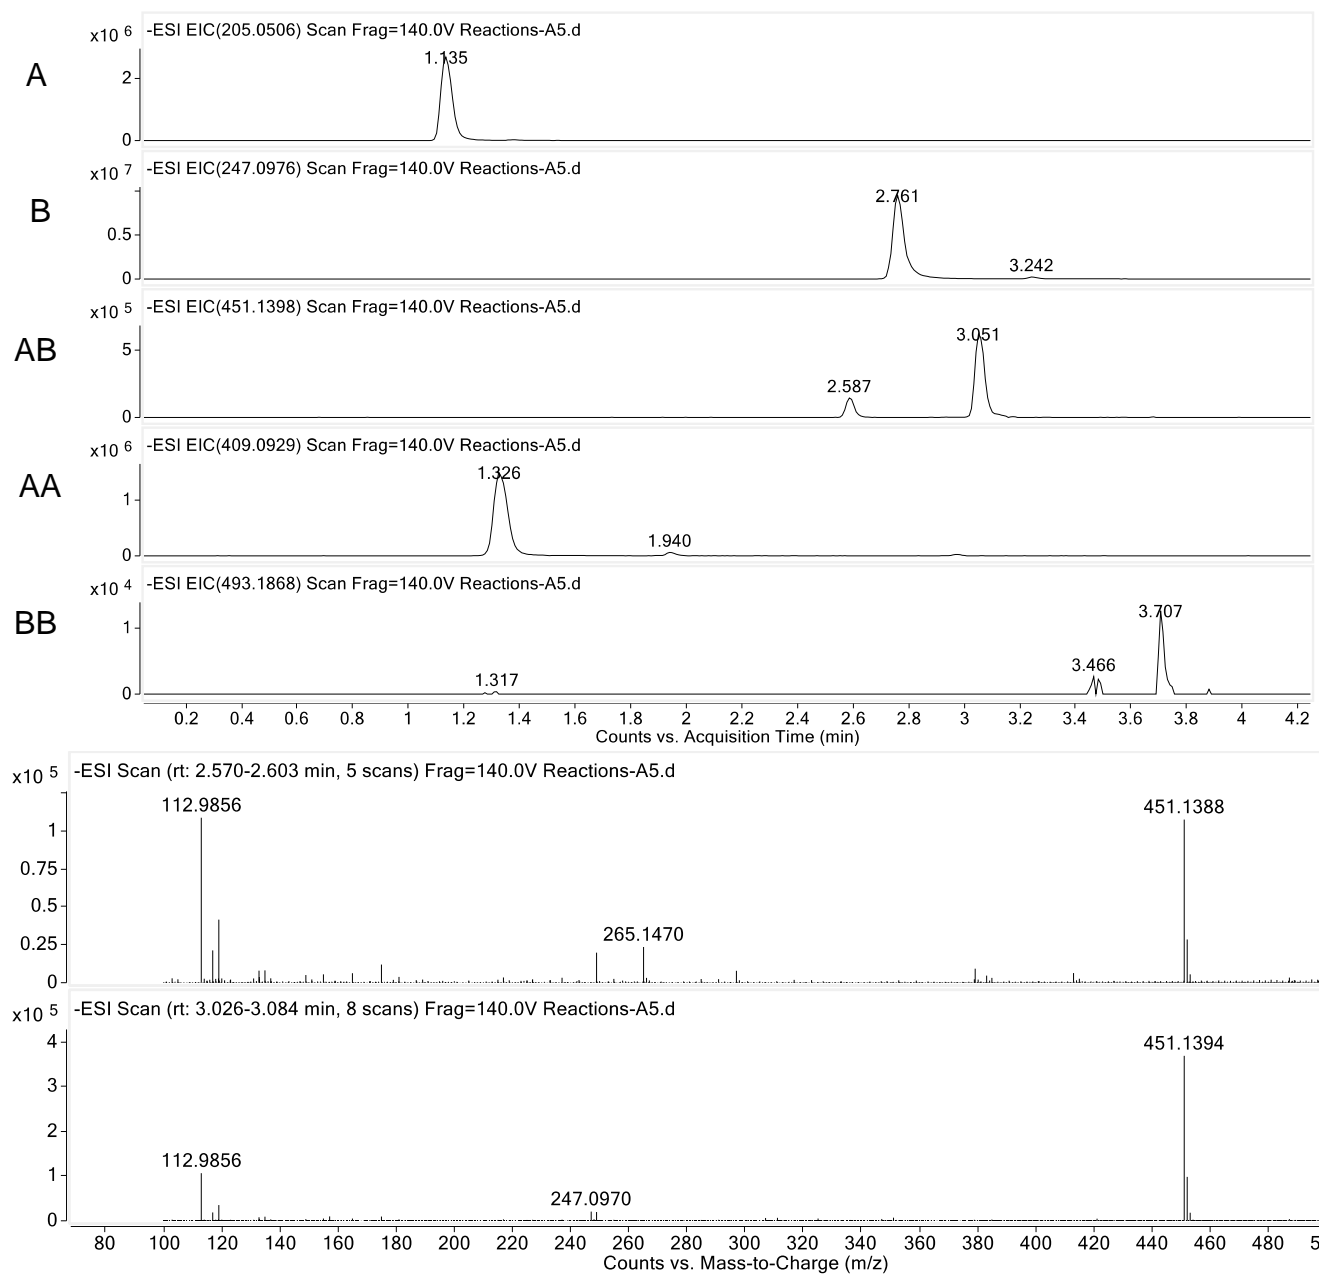

# No Enzyme control

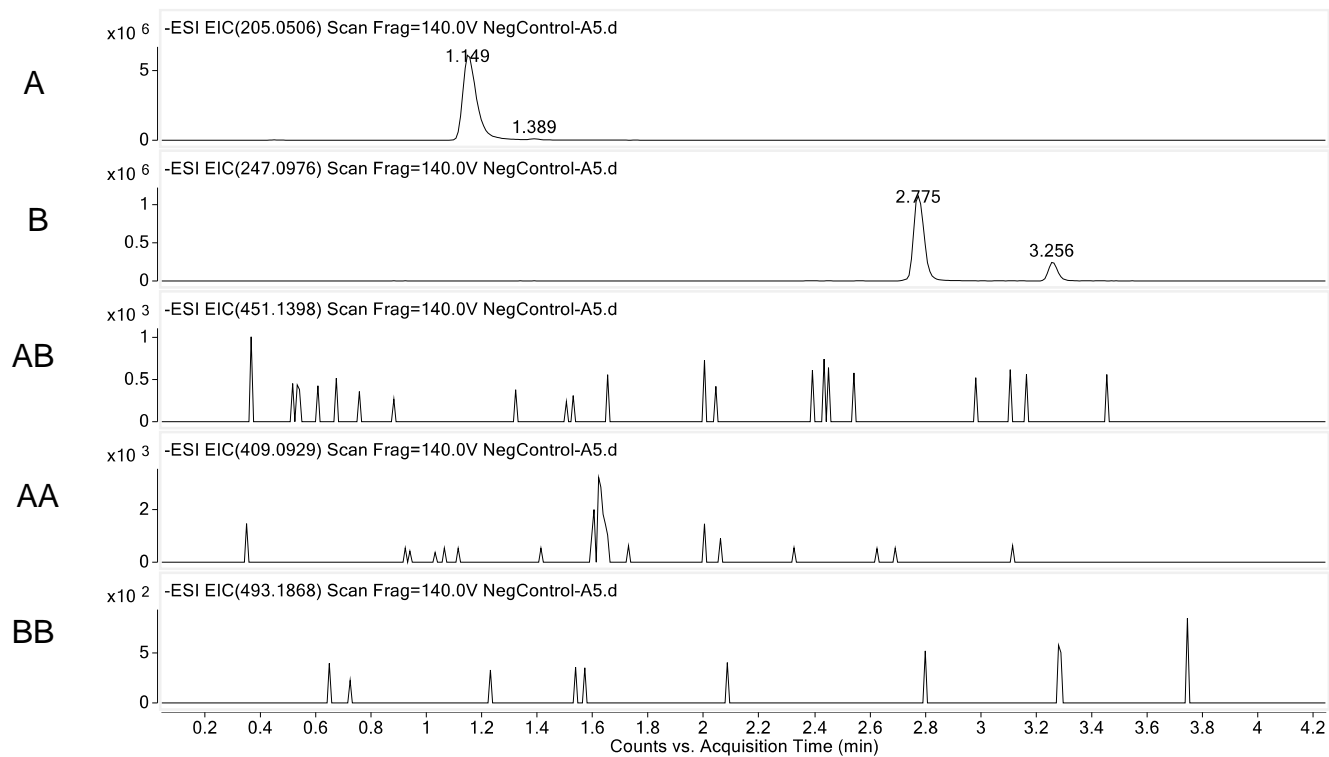

**Supplemental Figure S51.** Oxidative cross-coupling of **4** and **27** by KtnC (**Figure 2**).

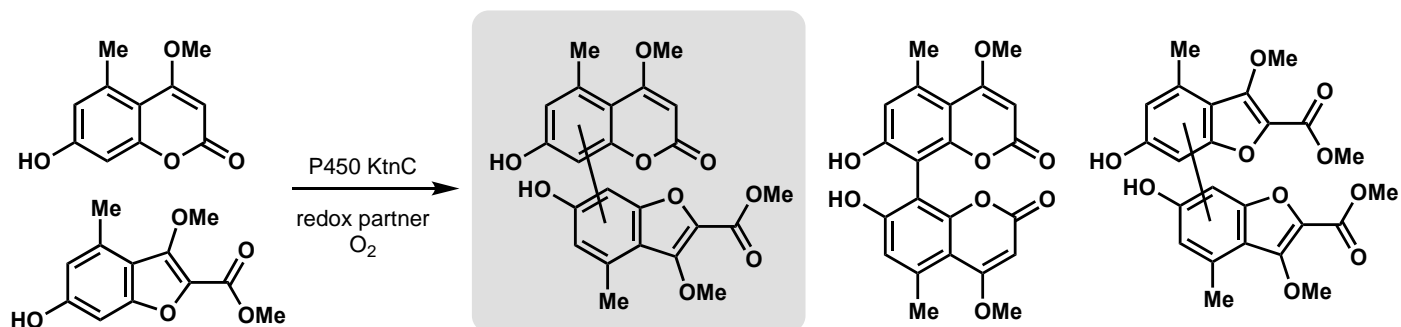

**KtnC**

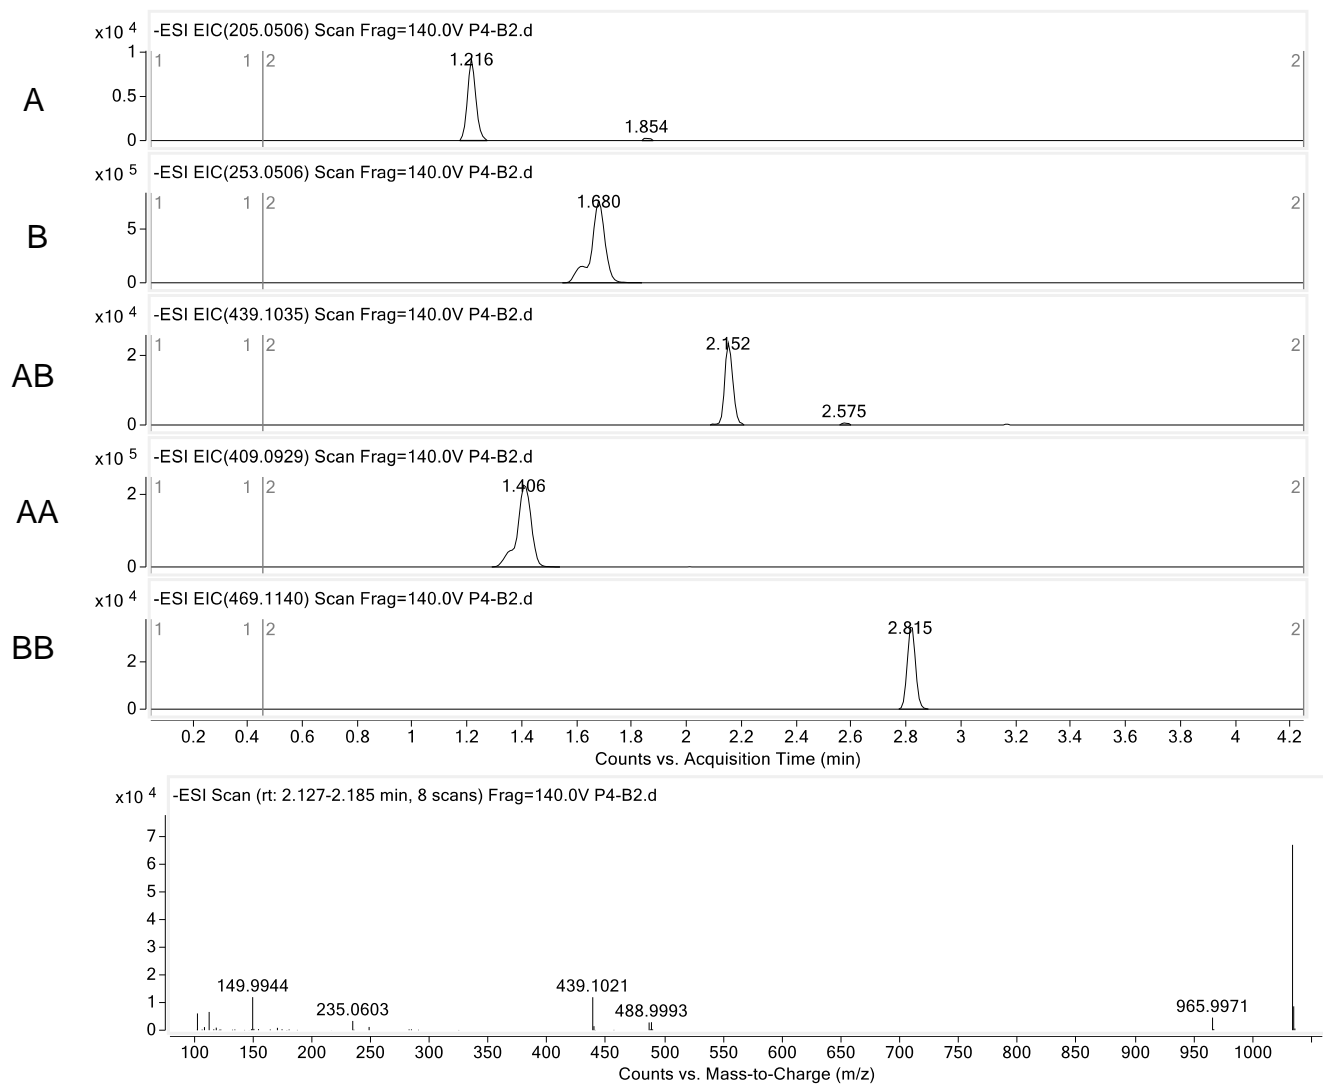

# No Enzyme control

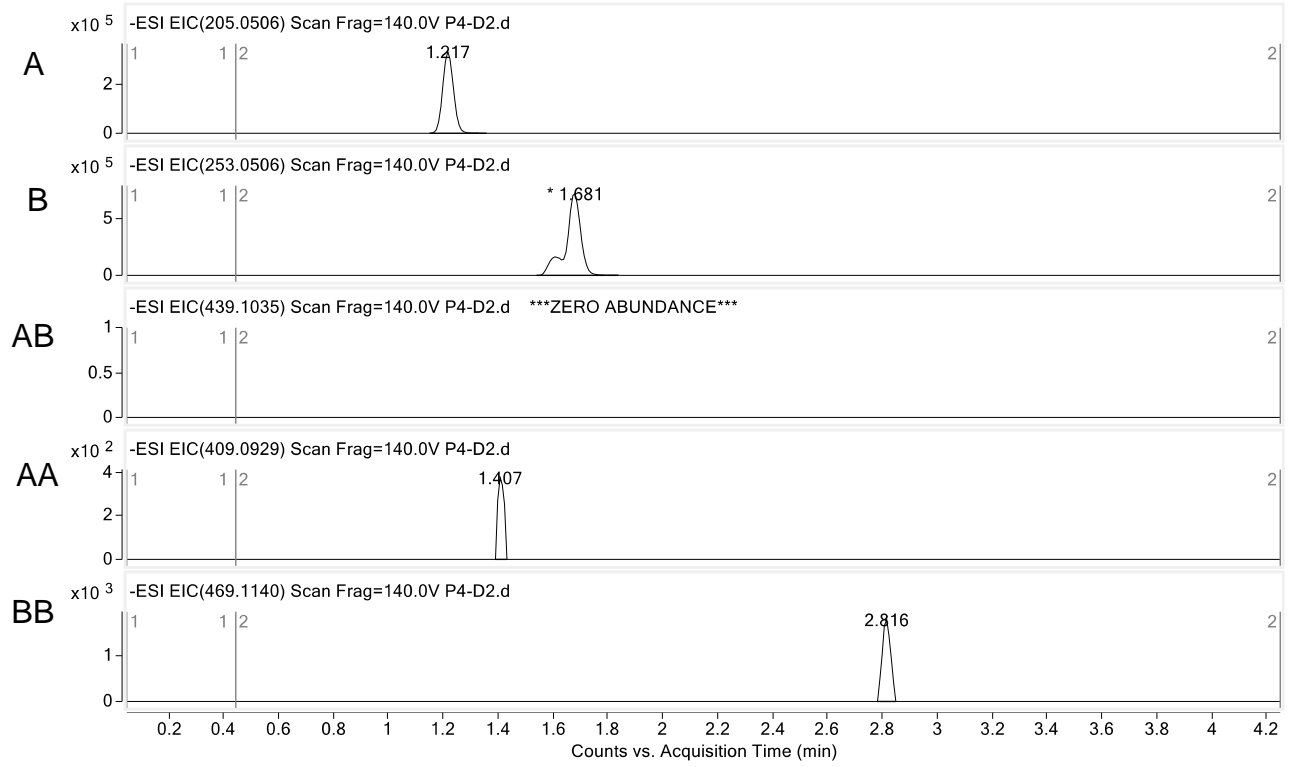

**Supplemental Figure S52. Oxidative cross-coupling of 4 and 28 by KtnC (Figure 2).**

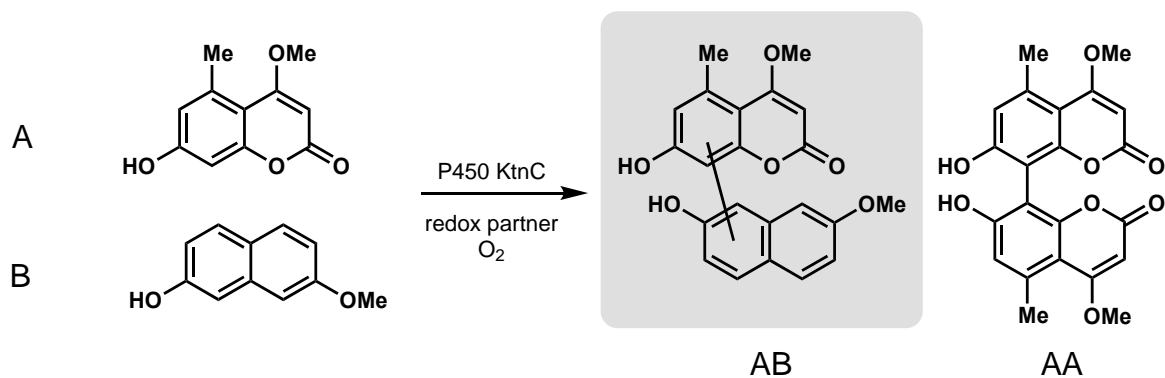

**KtnC**

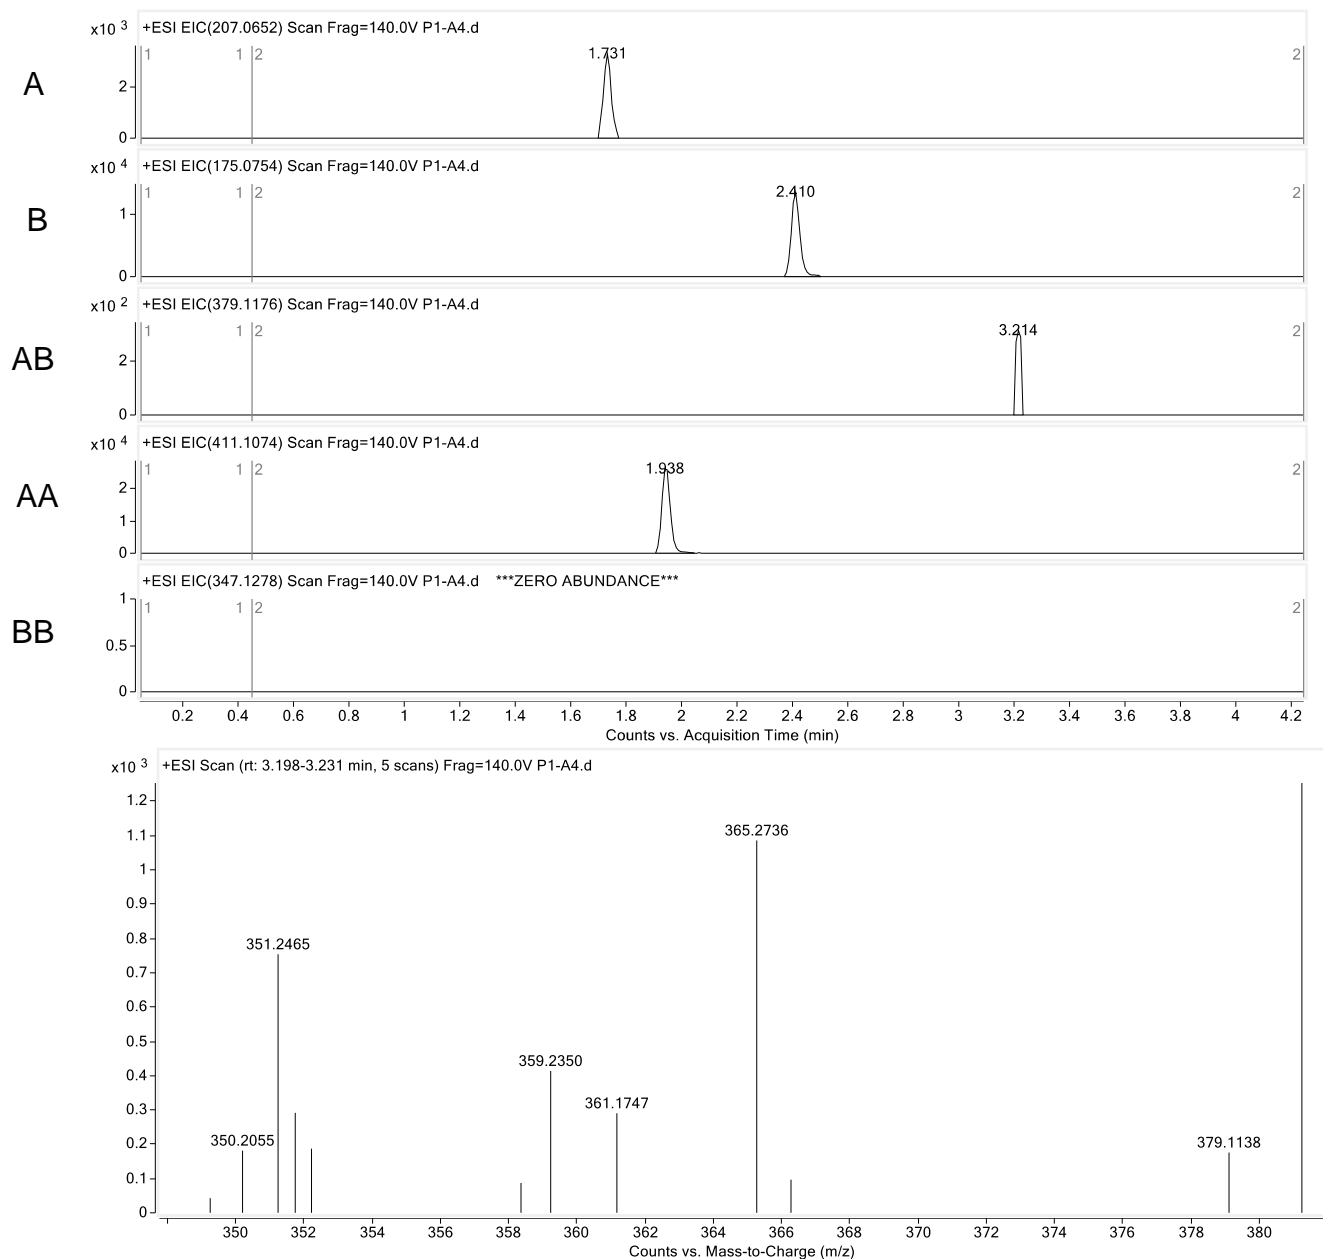

# No Enzyme control

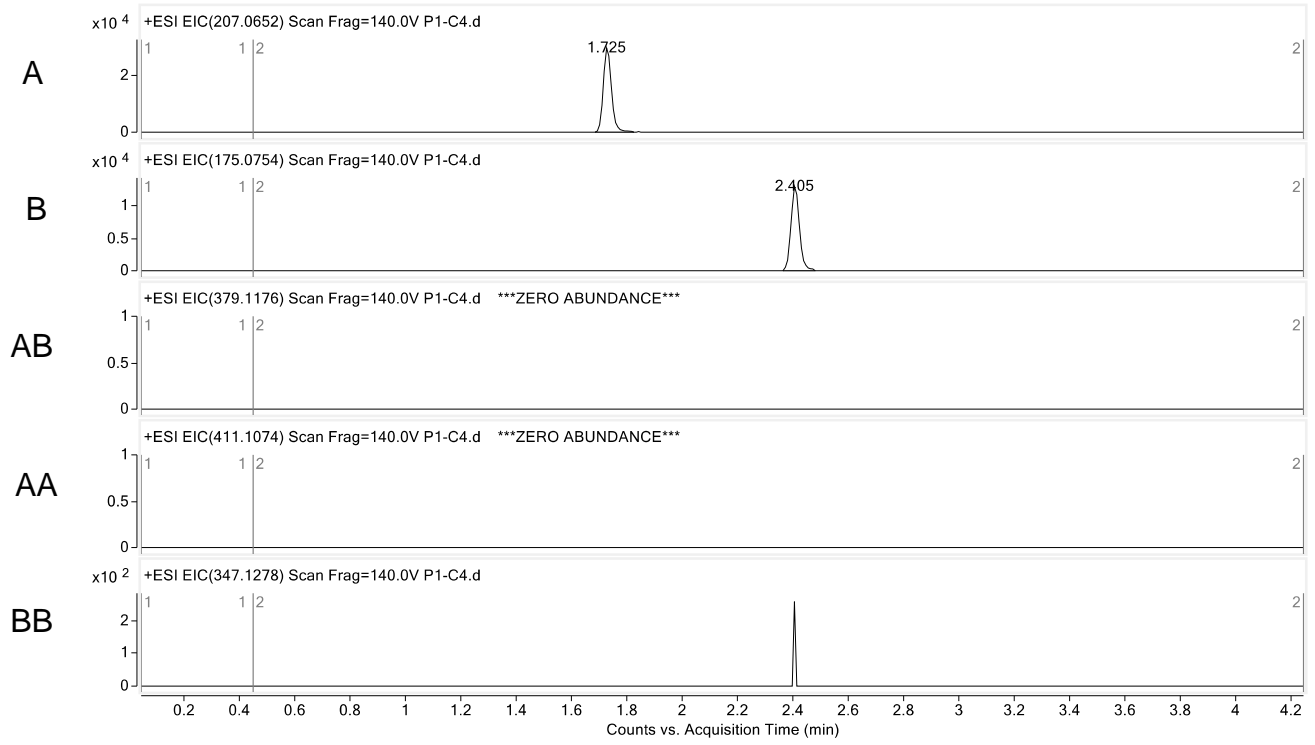

**Supplemental Figure S53. Oxidative cross-coupling of 4 and 29 by KtnC (Figure 2).**

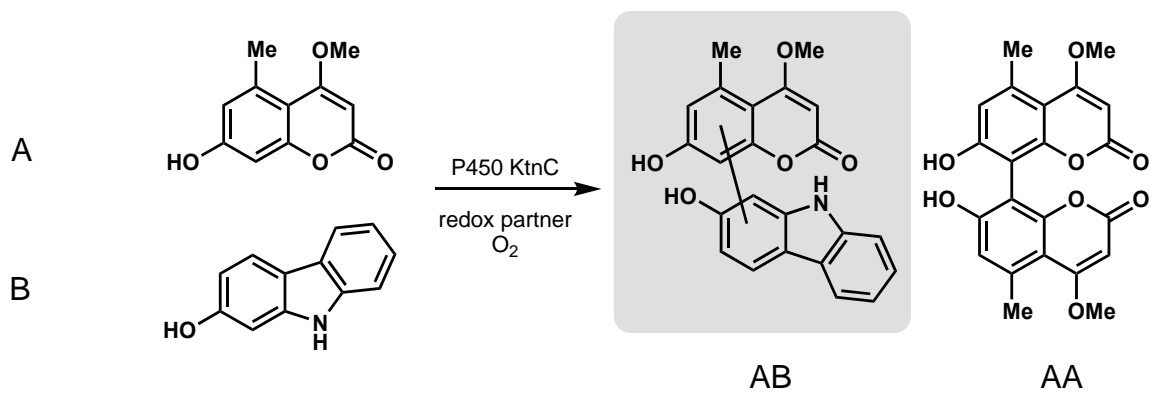

**KtnC**

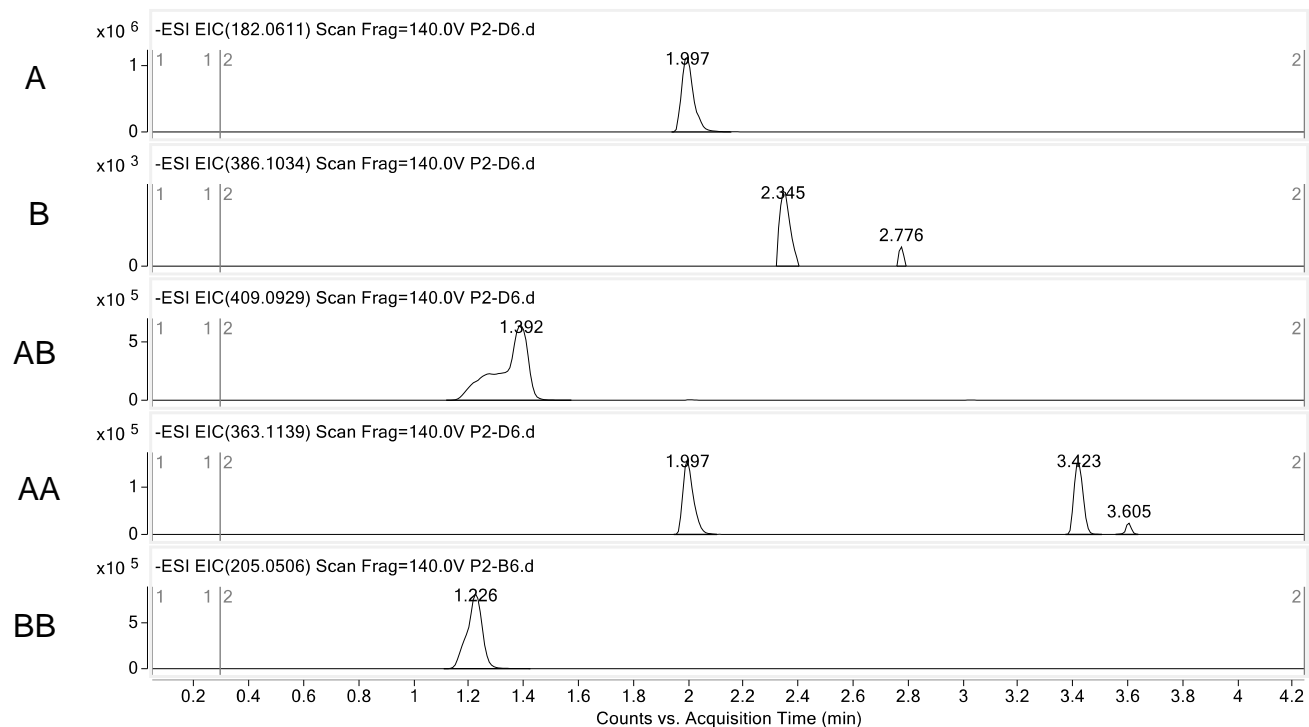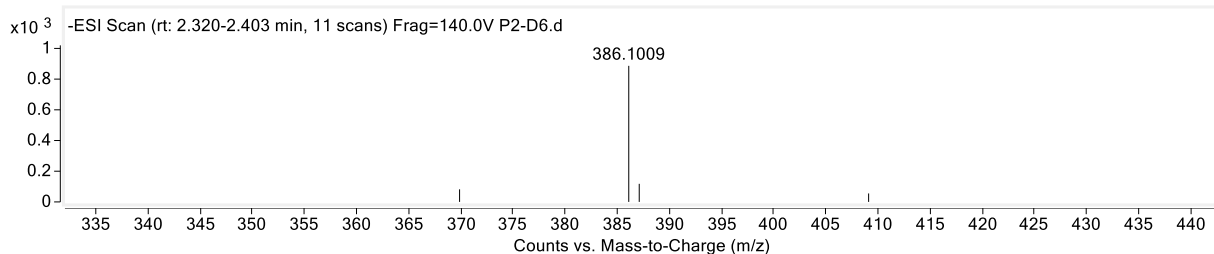

# No Enzyme control

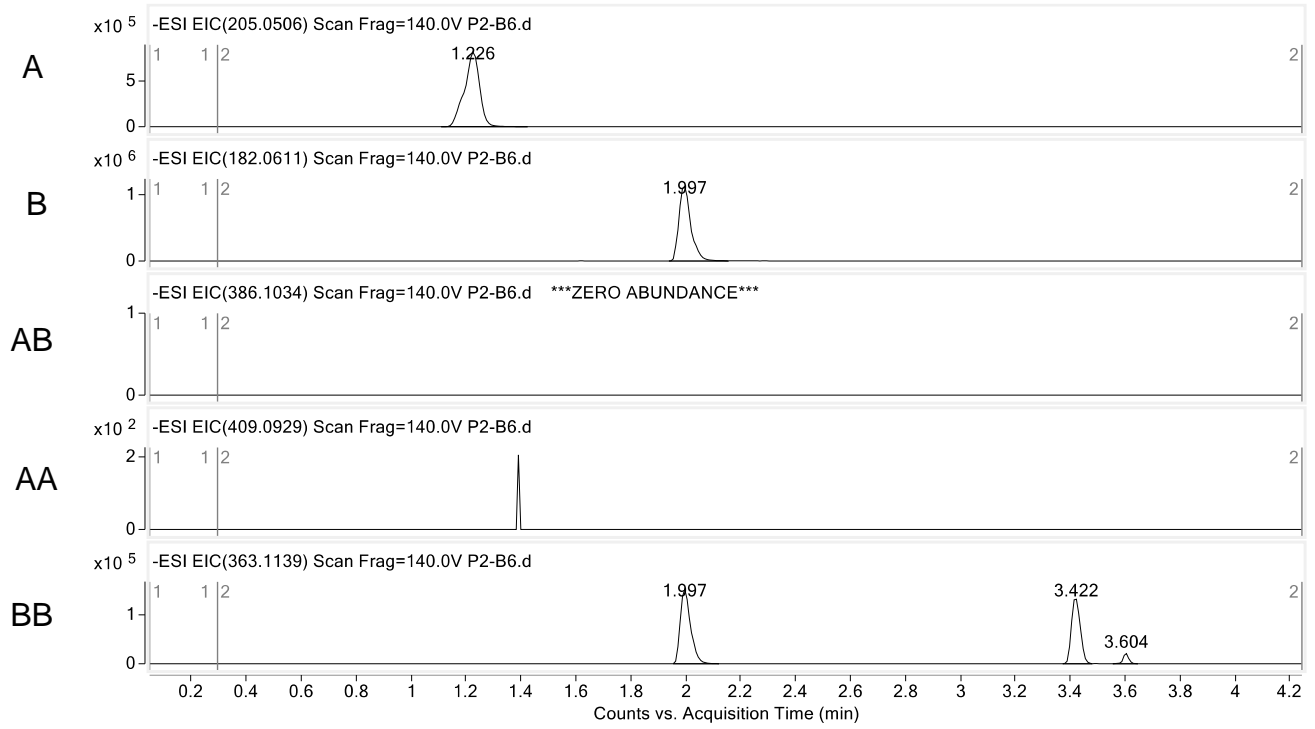



**Supplemental Figure S54.** Oxidative cross-coupling of **4** and **30** by KtnC (**Figure 2**).

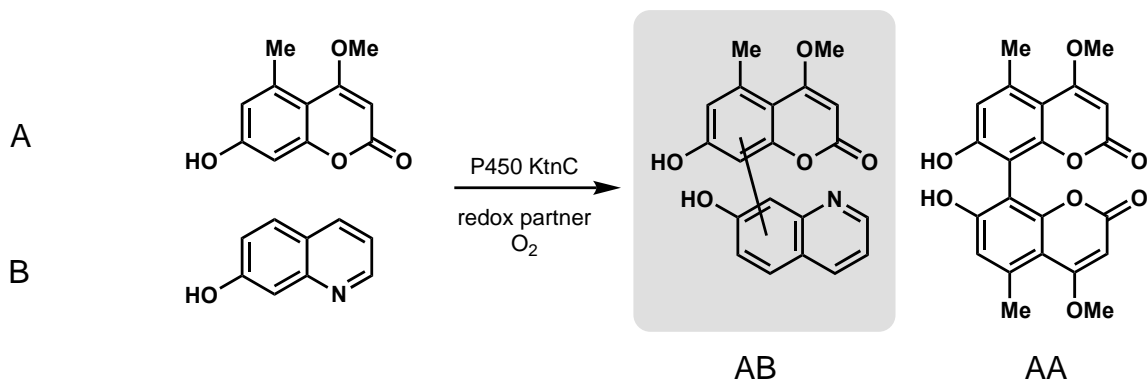

**KtnC**

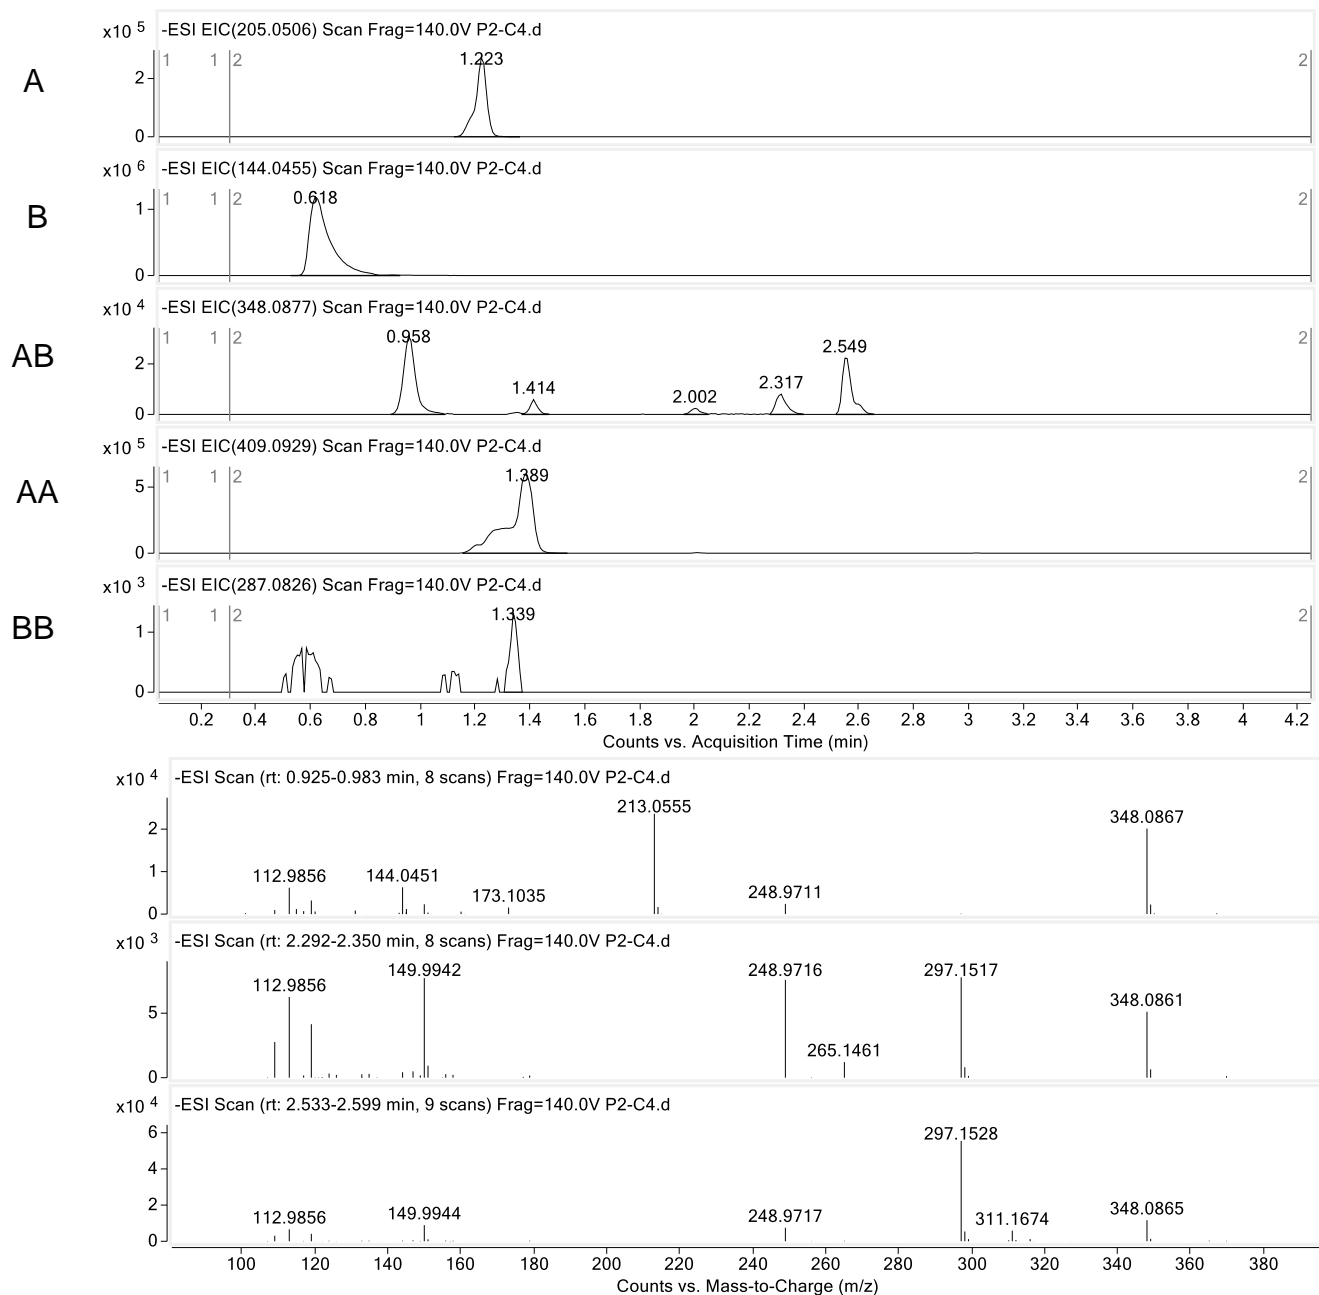

# No Enzyme control

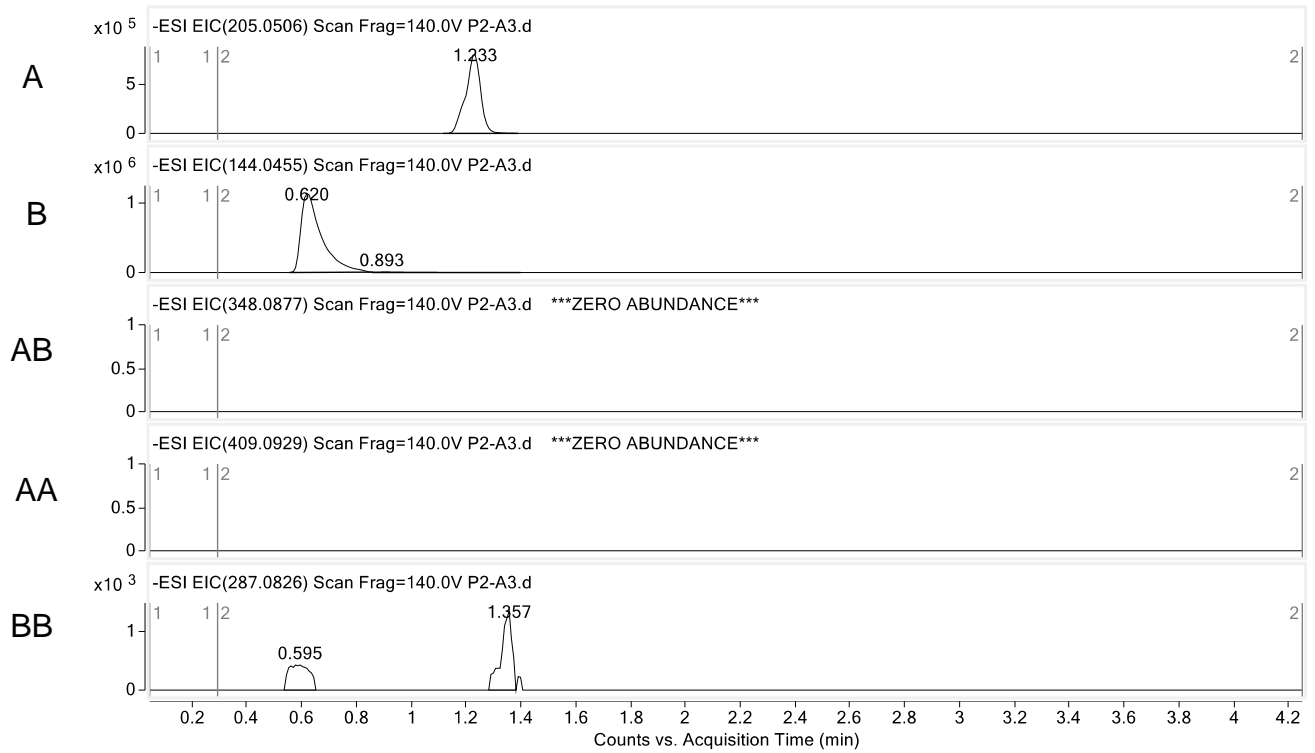

**Supplemental Figure S55. Oxidative cross-coupling of 4 and 31 by KtnC (Figure 2).**

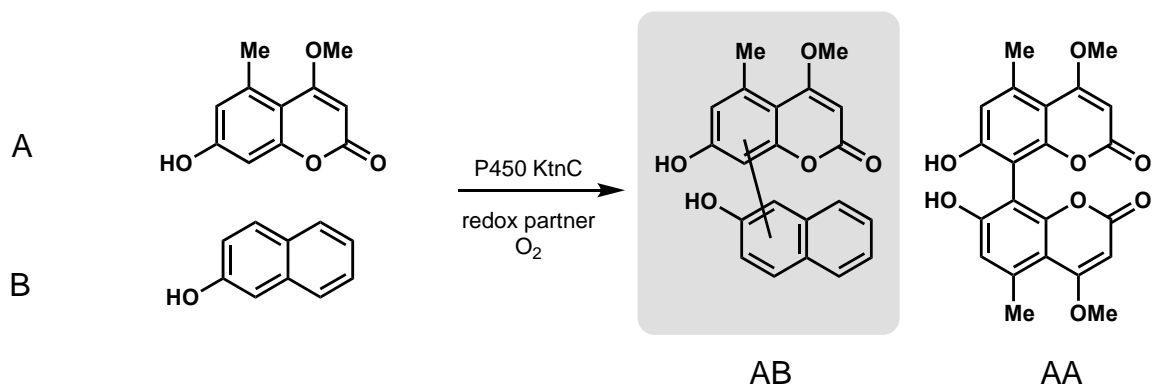

**KtnC**

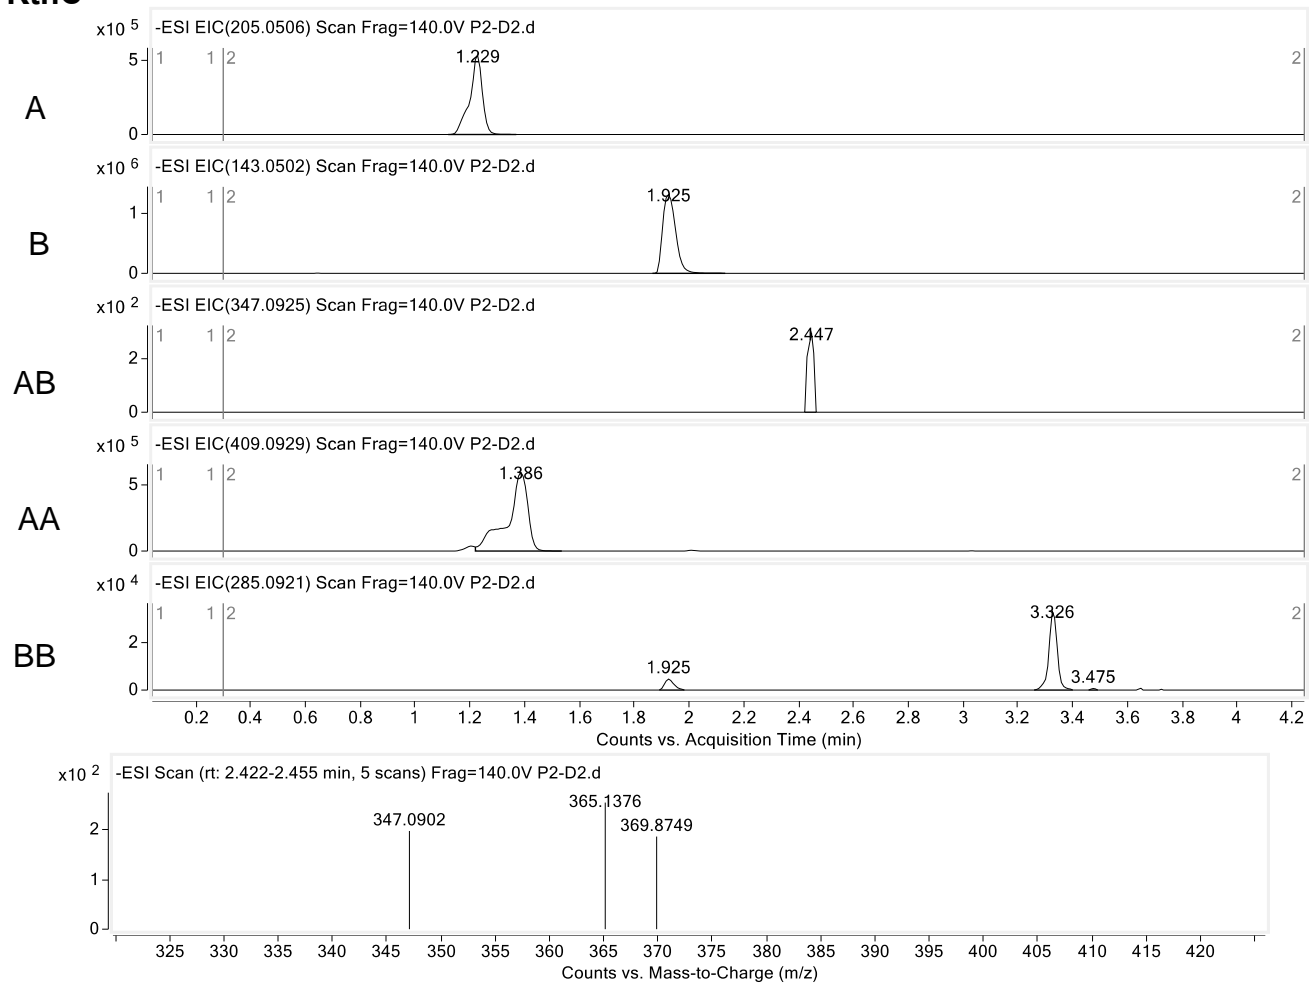

# No Enzyme control

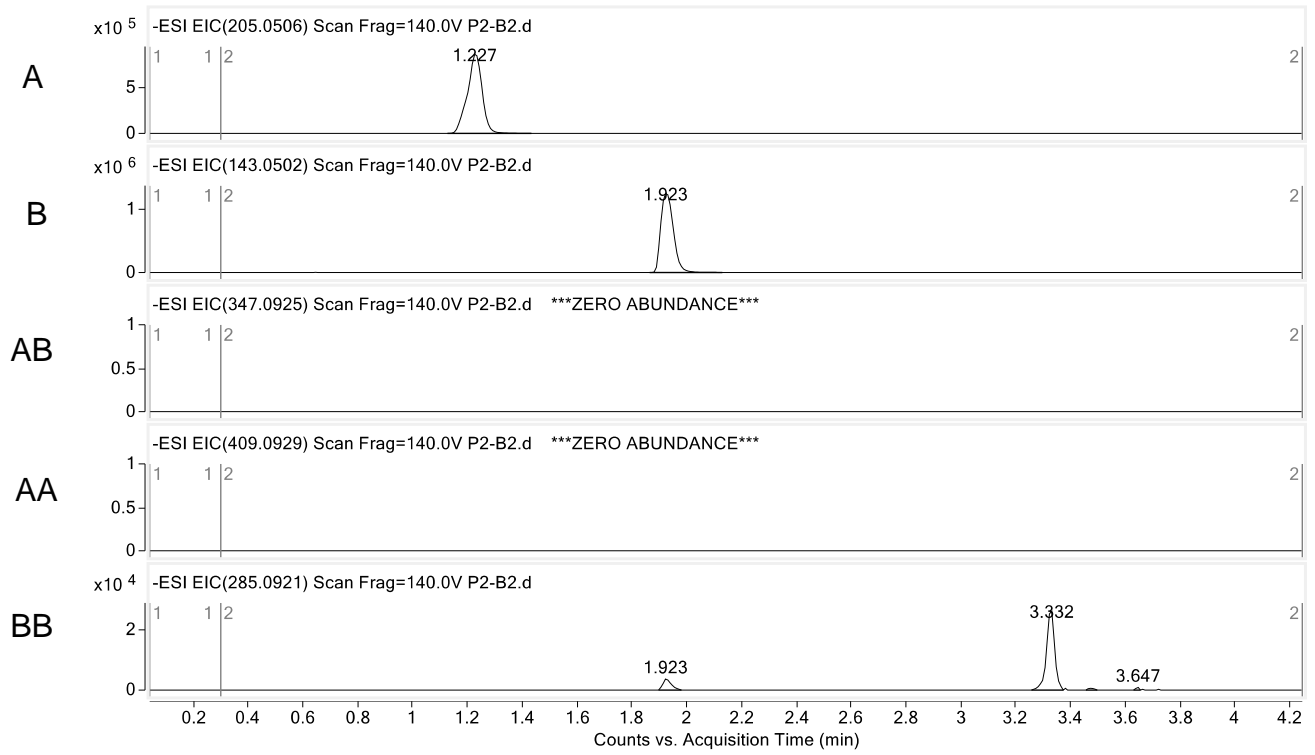

## Site- and atroposelectivity of biocatalytic reactions

Supplemental Figure S56. Site-selectivity of oxidative cross-coupling of **4** and **18** by KtnC (Figure 2).

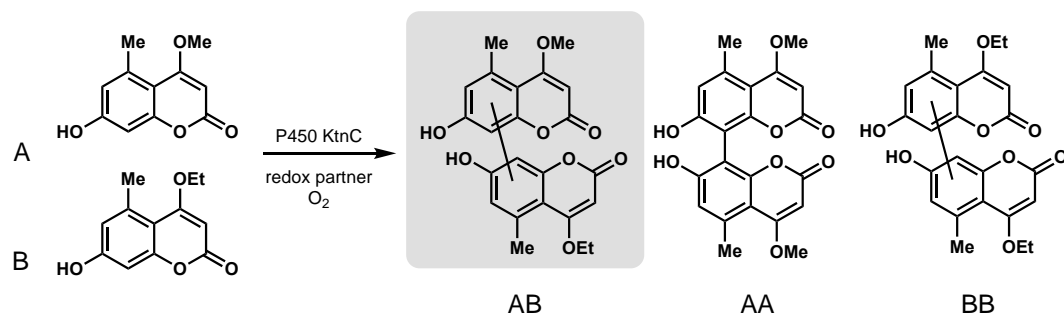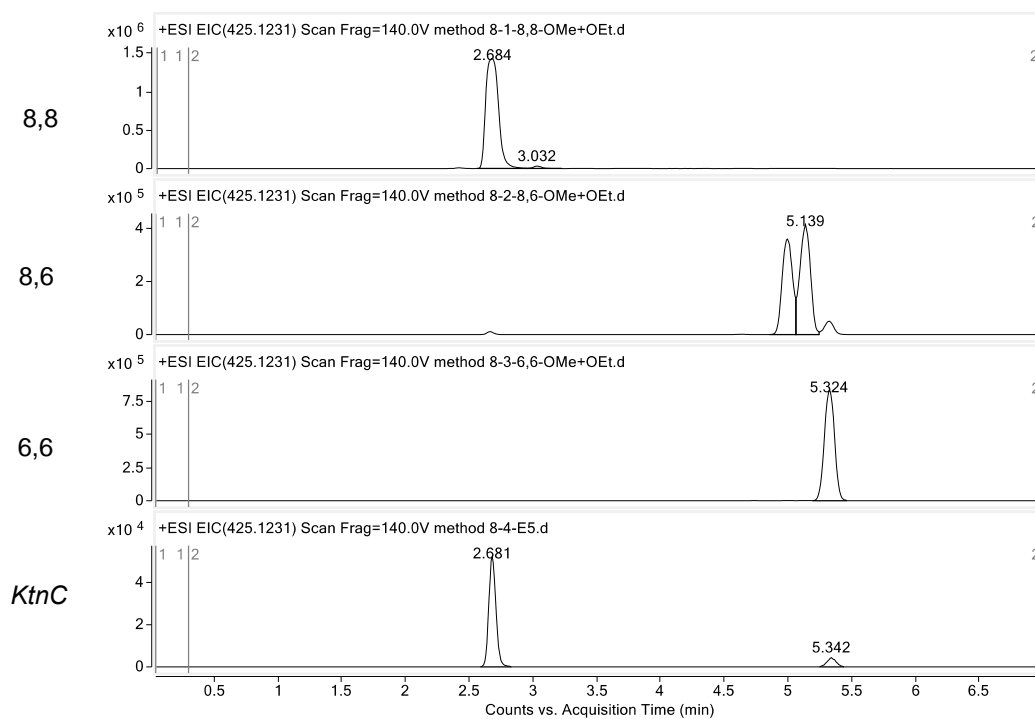

**Supplemental Figure S57.** Site-selectivity of oxidative cross-coupling of **4** and **22** by KtnC (**Figure 2**).

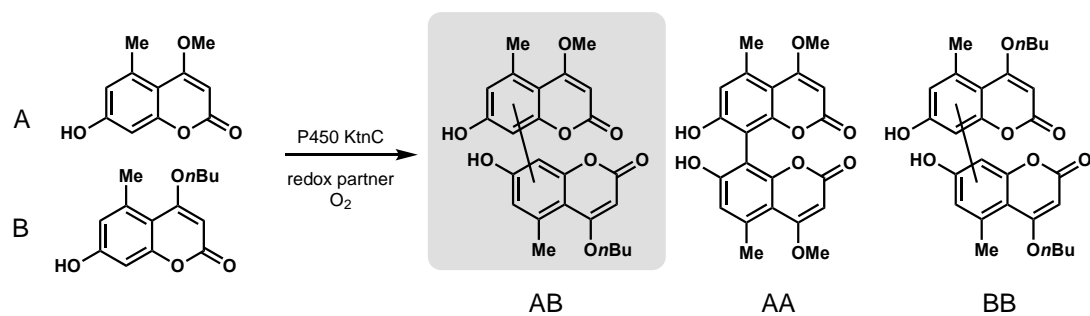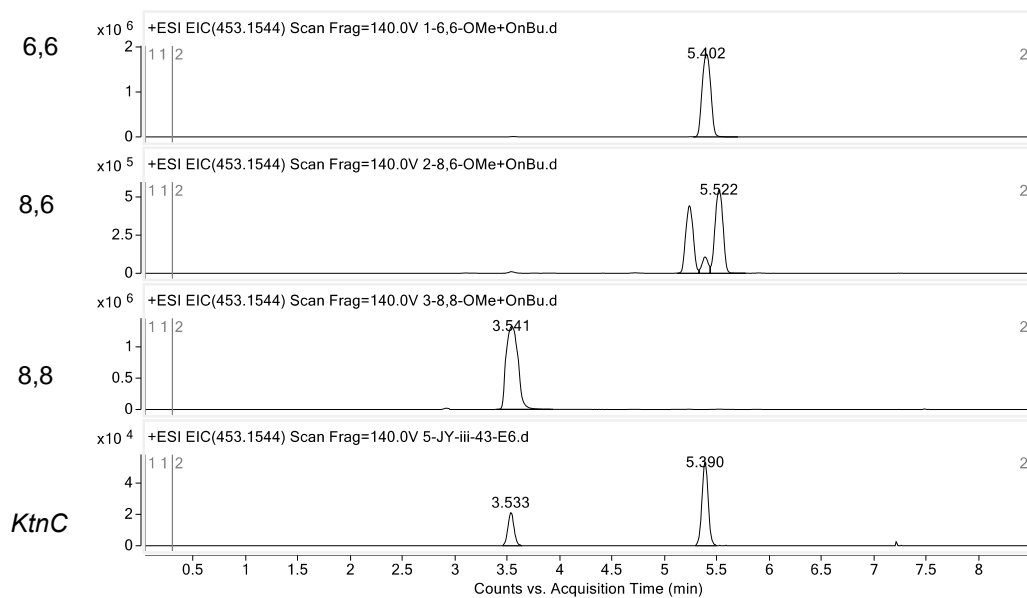

**Supplemental Figure S58. Site-selectivity of oxidative cross-coupling of 10 and 31 by KtnC (Figure 3).**

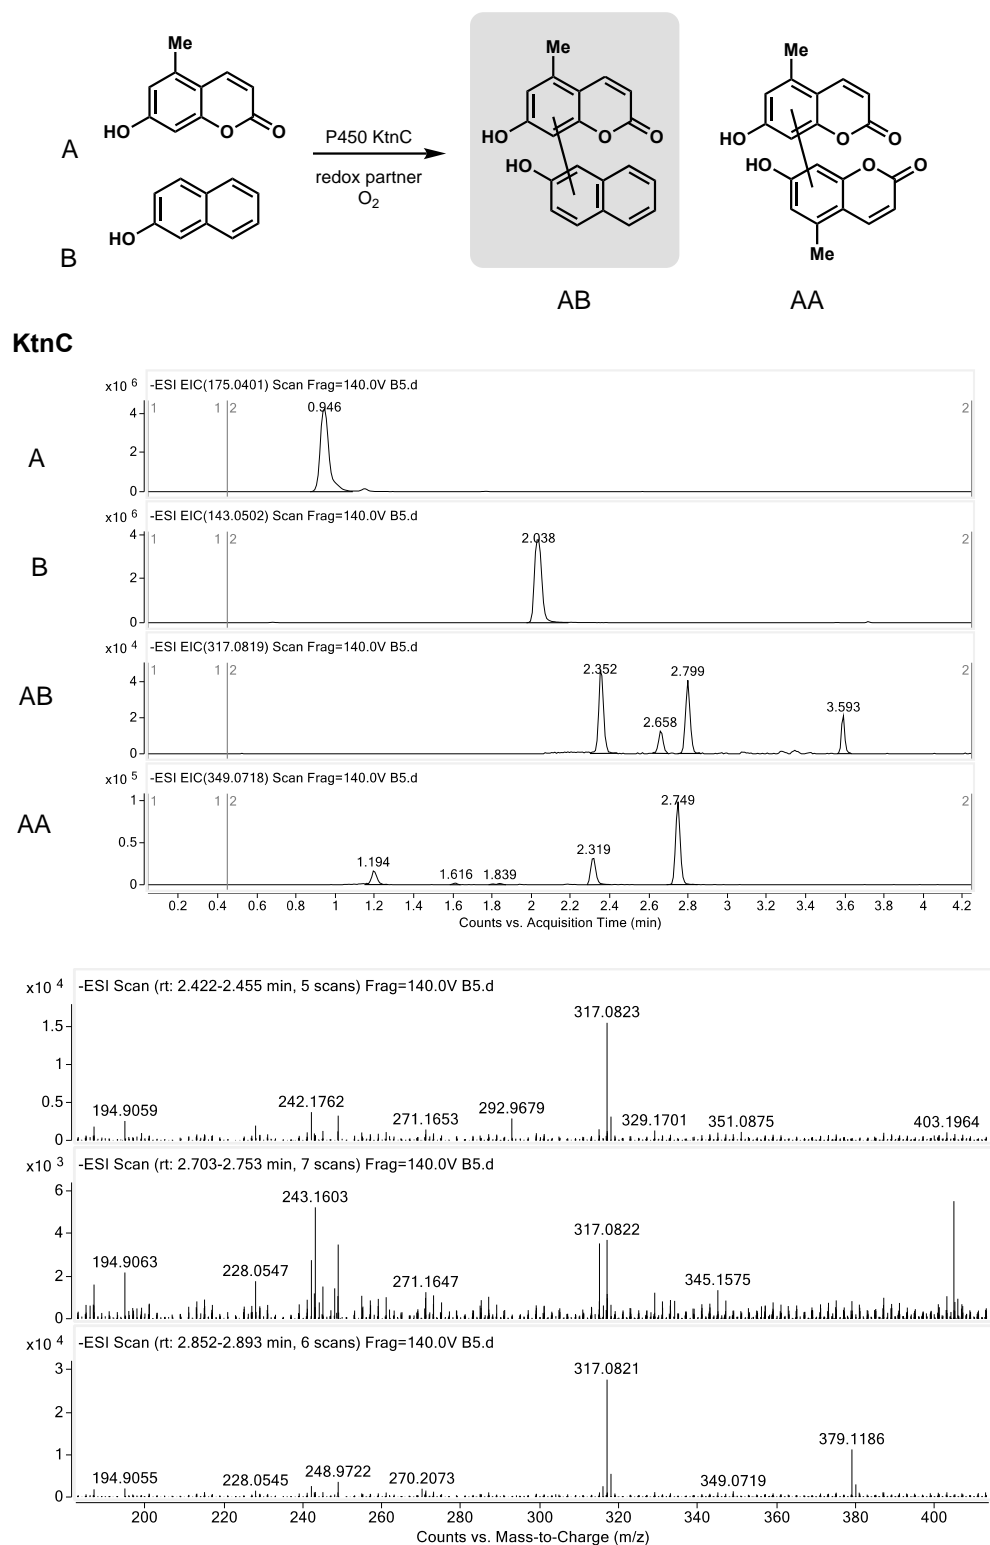

No enzyme control

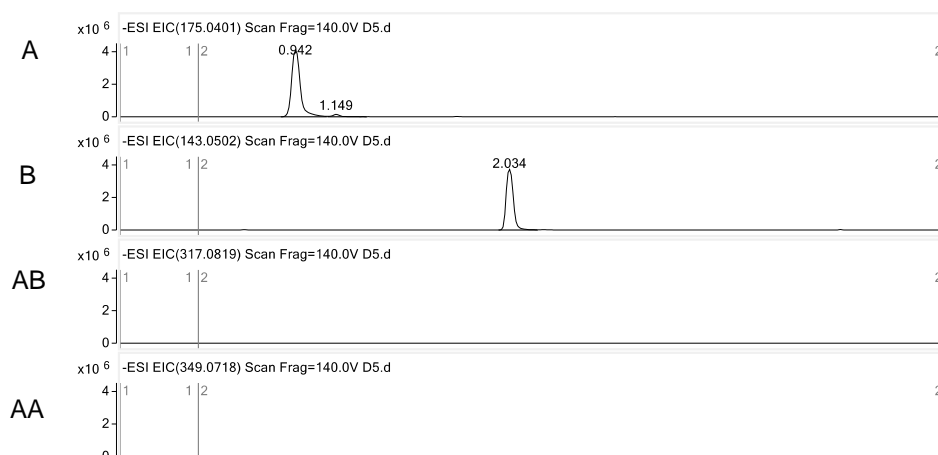

**Supplemental Figure S59.** Spiking of authentic standards into oxidative cross-coupling of **10** and **31** by KtnC to determine site-selectivity of biotransformation products (**Figure 3**).

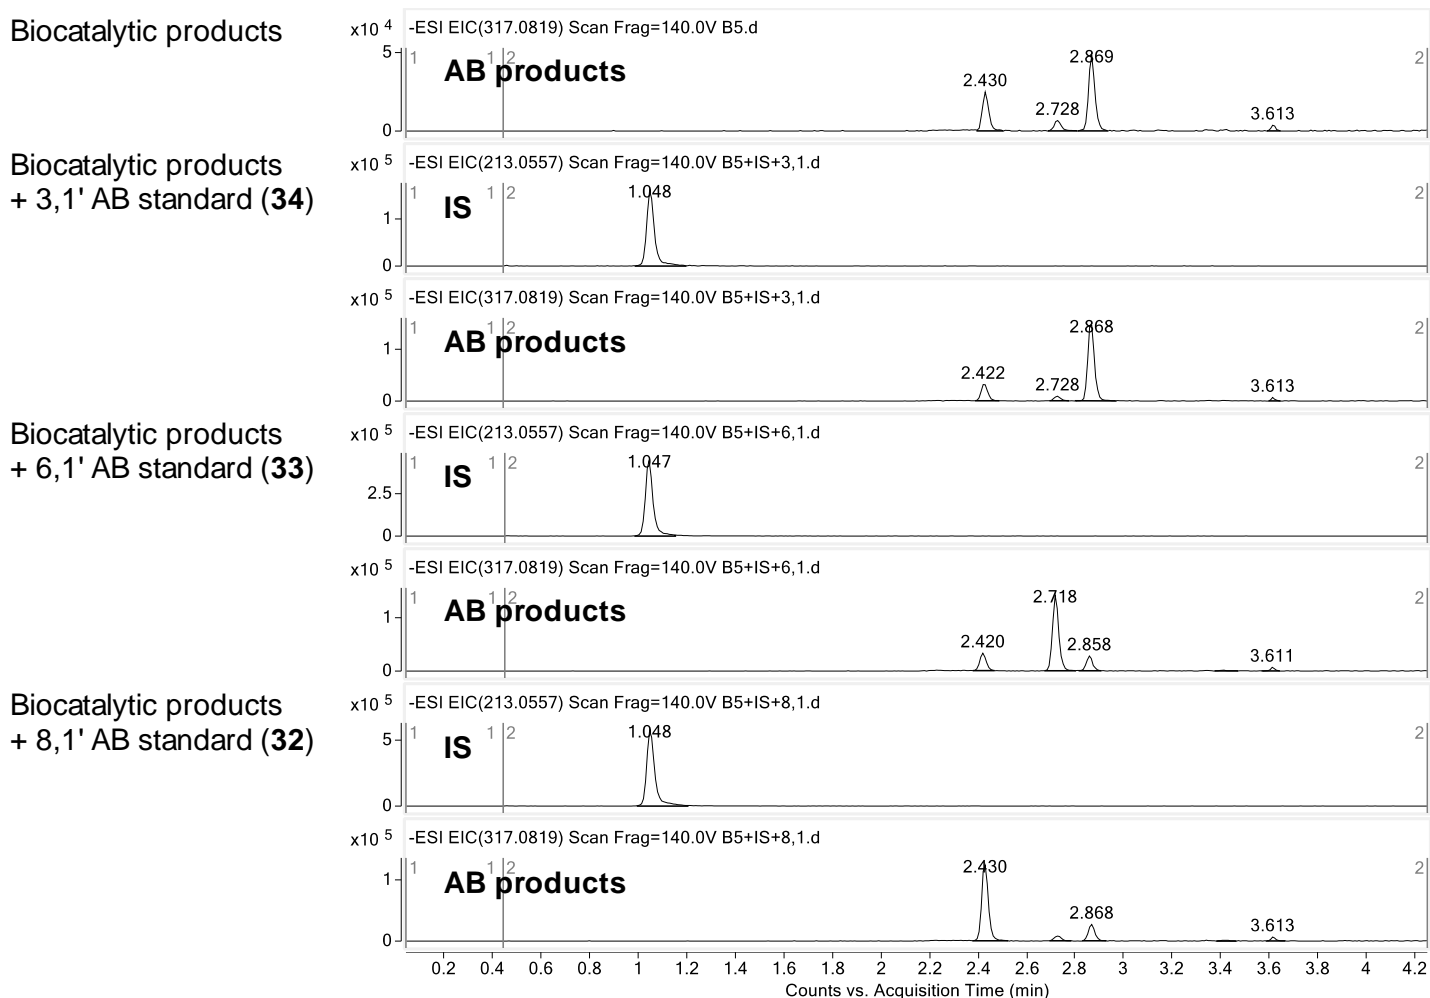



**Supplemental Figure S60.** Chiral resolution of **7** obtained from  $\text{VOF}_3$  oxidative dimerization (top) and KtnC-catalyzed oxidative dimerization (bottom). Atropisomers were resolved using supercritical fluid chromatography with a CHIRALPAK OJ-H column (20% MeOH,  $\text{CO}_2$ , 3.5 mL/min).

2998 Ch1 308nm Plot

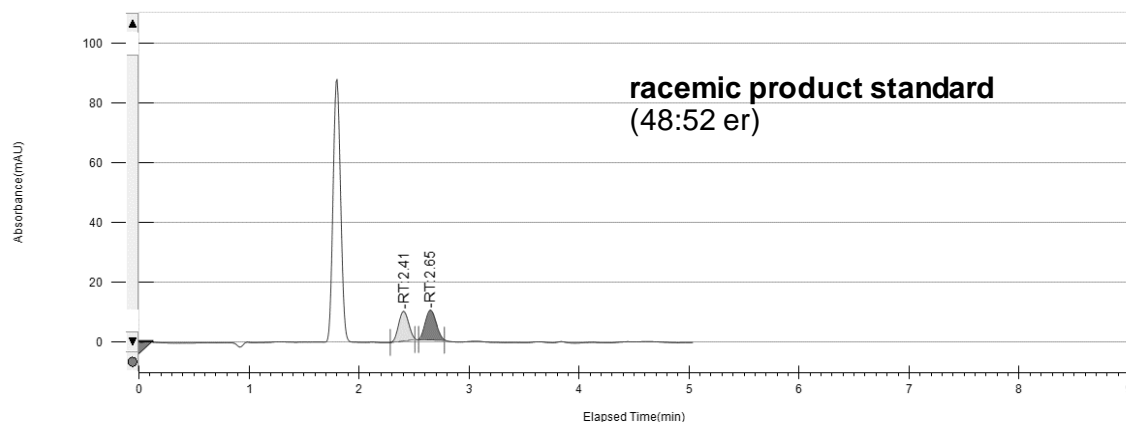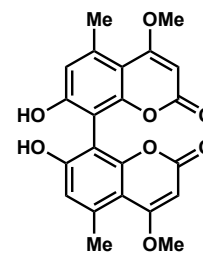

2998 Ch1 308nm Plot

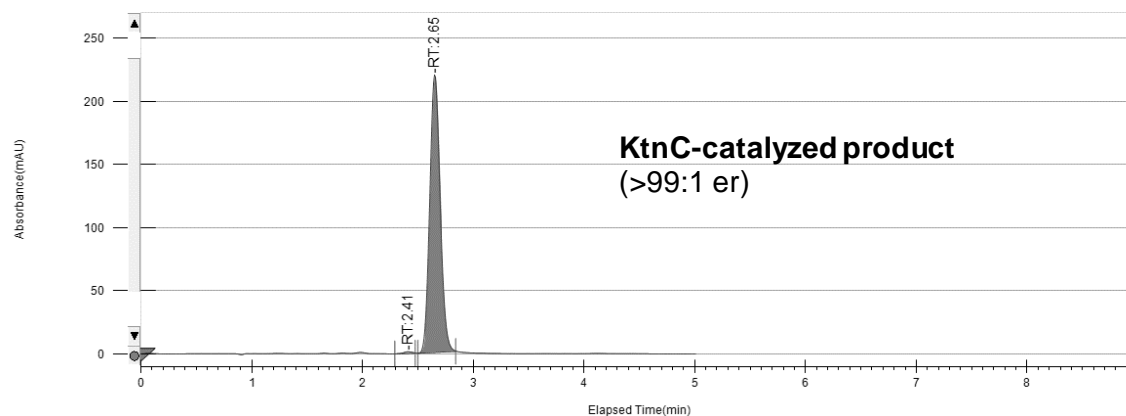

**Supplemental Figure S61.** Chiral resolution of **23** obtained from transesterification (top) and KtnC-catalyzed oxidative dimerization (bottom). Atropisomers were resolved using supercritical fluid chromatography with a CHIRALPAK OJ-H column (25% MeOH, CO<sub>2</sub>, 3.5 mL/min).

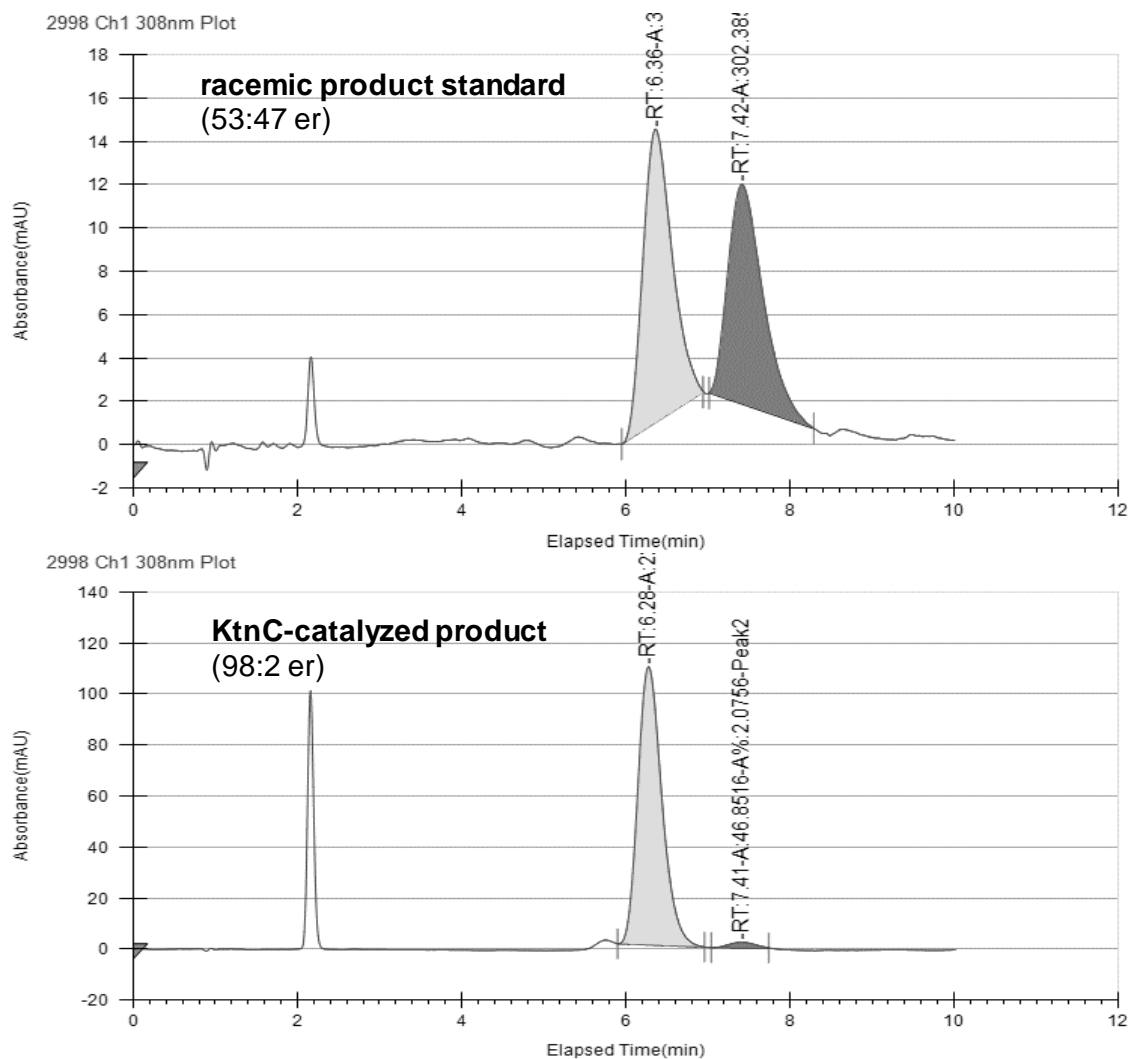

**Supplemental Figure S62.** Chiral resolution of **24** obtained from transesterification (top) and KtnC-catalyzed oxidative dimerization (bottom). Atropisomers were resolved using supercritical fluid chromatography with a CHIRALPAK OJ-H column (25% MeOH, CO<sub>2</sub>, 3.5 mL/min).

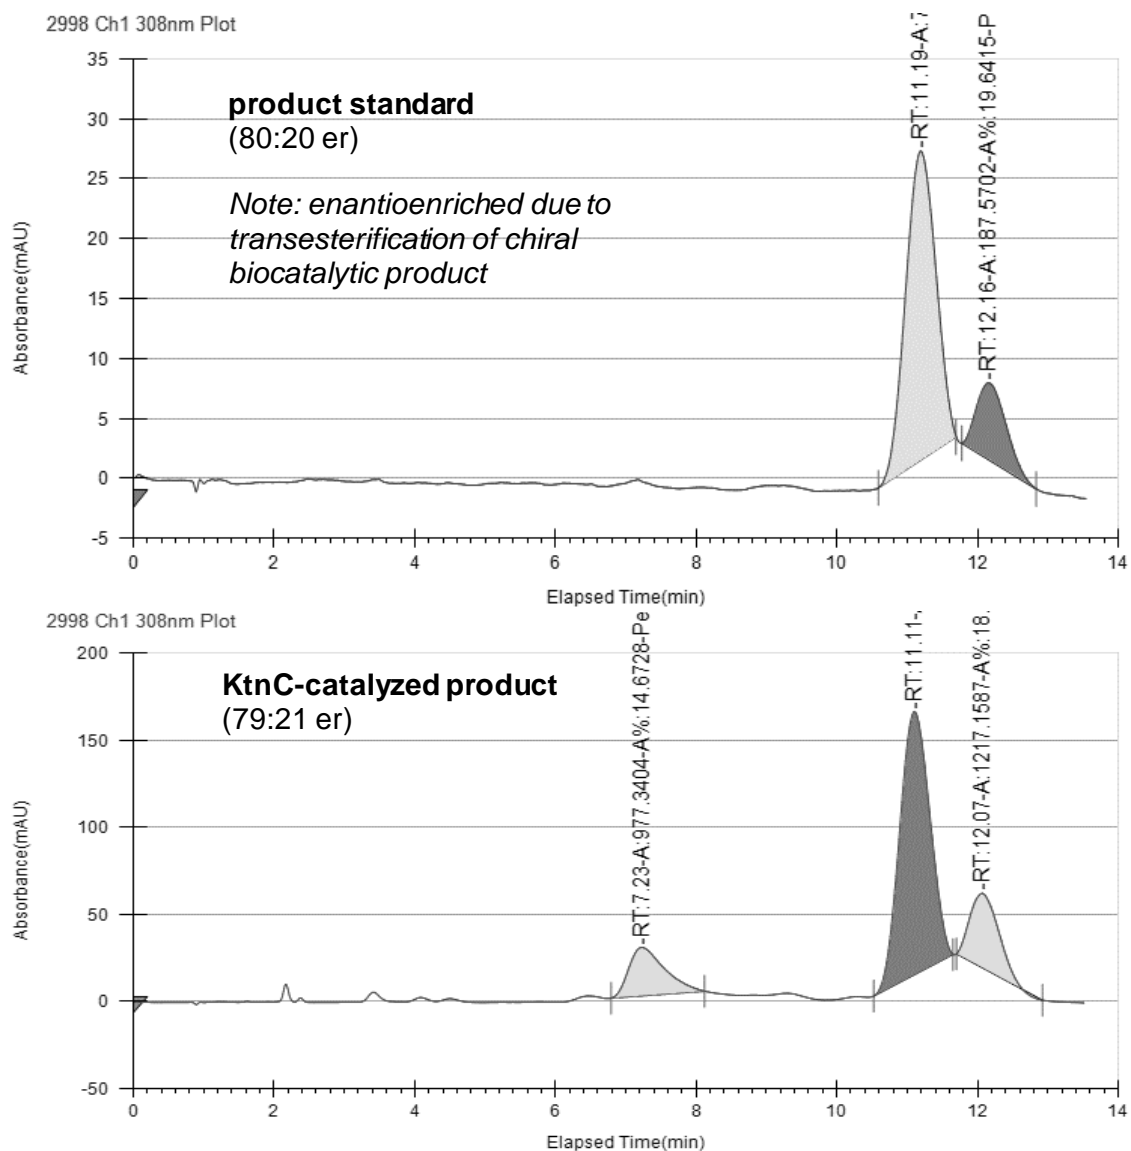

**Supplemental Figure S63.** Chiral resolution of **25** obtained from KtnC-catalyzed oxidative cross-coupling (top) and transesterification (bottom). Atropisomers were resolved by liquid chromatography PDA spectrometry (UPLC) analysis performed on an Agilent 6230 time of flight mass spectrometer with a Dual AJS ESI source and an Agilent 1290 Infinity Series II diode array detector, autosampler, and binary pump, using a Daicel Chiralpak IC-3, 4.6 x 150 mm, 3  $\mu$ m column under the following conditions: negative mode, phase A = 95:5 deionized water:acetonitrile, B = 95:5 acetonitrile:deionized water; method = 80% A to 0% A over 12.0 min, held at 0% A for 3.0 min, to 80% A over 2.0 minutes. Total of 17.0 minutes with a 1.5 mL/min flow rate, and heating to 30 °C.

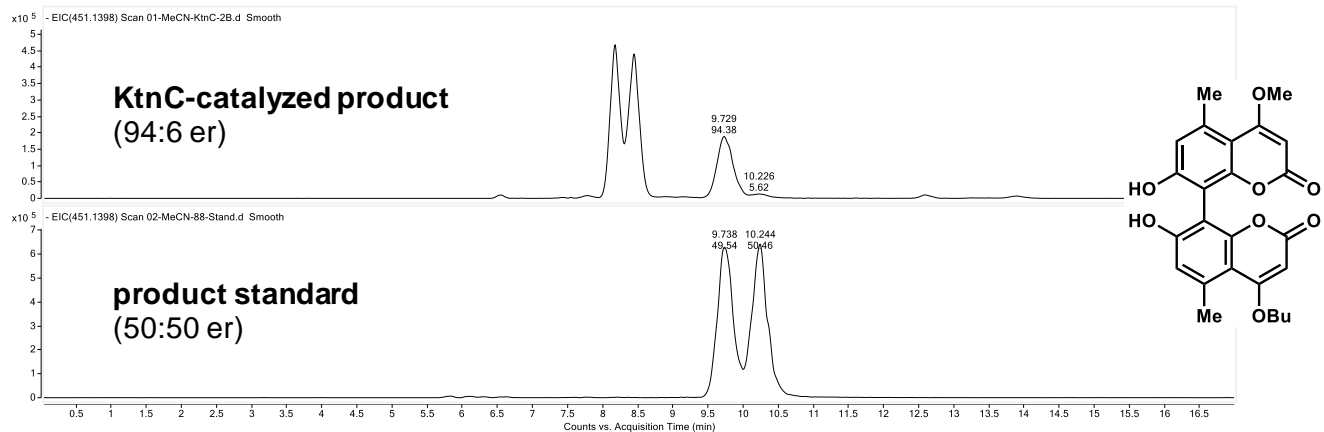

**Supplemental Figure S64.** Chiral resolution of **26** obtained from KtnC-catalyzed oxidative cross-coupling (top) and transesterification (bottom). Atropisomers were resolved by liquid chromatography PDA spectrometry (UPLC) analysis performed on an Agilent 6230 time of flight mass spectrometer with a Dual AJS ESI source and an Agilent 1290 Infinity Series II diode array detector, autosampler, and binary pump, using a Daicel Chiralpak IC-3, 4.6 x 150 mm, 3  $\mu$ m column under the following conditions: negative mode, phase A = 95:5 deionized water:acetonitrile, B = 95:5 acetonitrile:deionized water; method = 80% A to 0% A over 85.0 min, held at 0% A for 3.0 min, to 80% A over 1.0 minutes, held at 80% A for 1.0 minutes. Total of 90.0 minutes with a 1.5 mL/min flow rate, and heating to 30 °C.

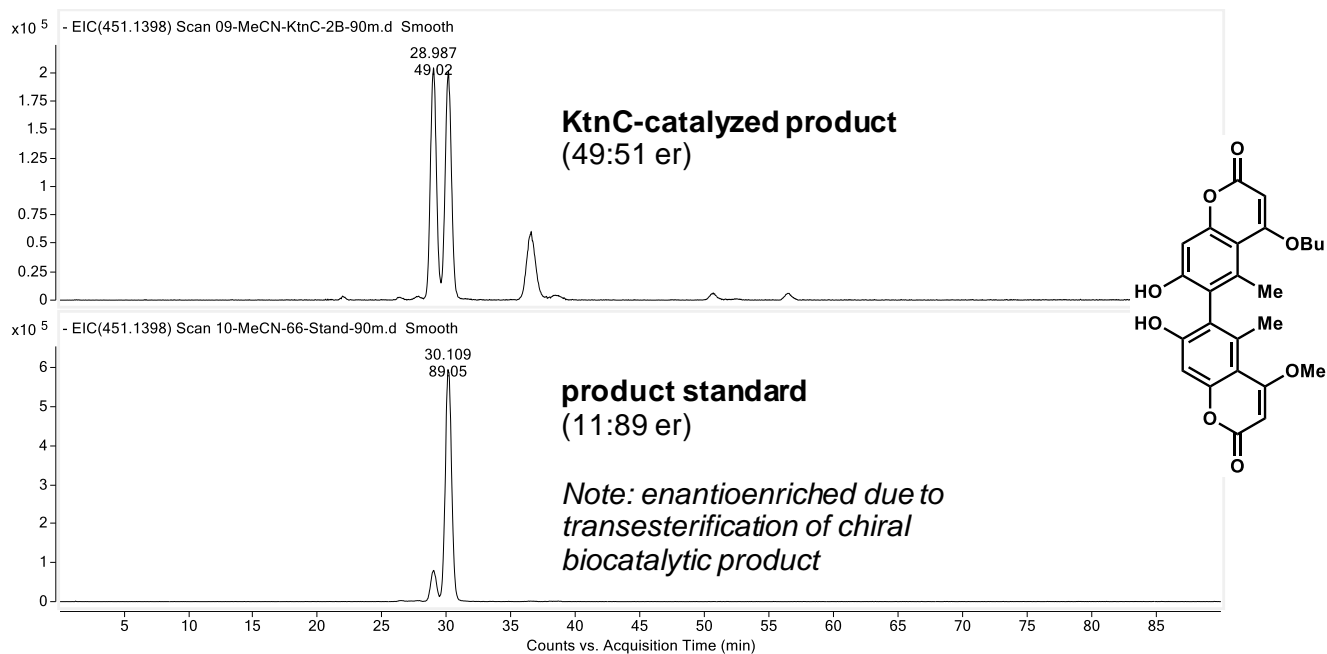

## IV. Directed evolution of fungal P450 KtnC

### Generation of protein libraries

**Selection of active site residues to target.** A homology model for KtnC was generated using Phyre2 (Supplemental Figure S65a). All residues within ~12 Å of predicted substrate binding region in the KtnC homology model active site were selected in PyMOL (command: “select bca. KtnC within 12 of substrate”). Any residues with >95% conservation based on a MAFFT alignment with up to 5,000 other sequences were removed from the pool of selected residues. The radius of the active site sphere was reduced incrementally until a total of 96 residues with ≤95% conservation were selected within an 11.25 Å radius (Supplemental Figure S65b).

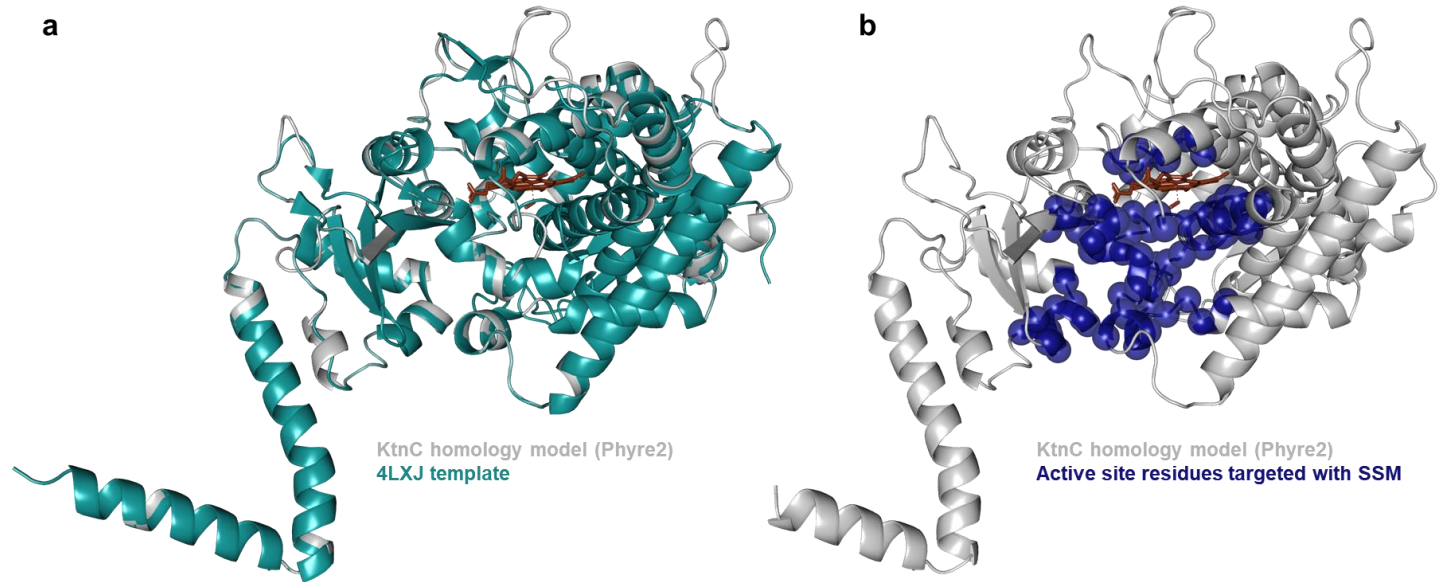

**Supplemental Figure S65.** (a) Homology model of KtnC (gray) and based on 23% identity with lanosterol 14- $\alpha$  demethylase from *S. cerevisiae* (PDB 4LXJ; teal). (b) Residues selected for SSM within active site sphere.

**Site-saturation mutagenesis.** Degenerate forward and reverse primers were designed for each of the 96 active site residues being targeted and purchased from IDT (Supplemental Table S4). Blunt-end whole-plasmid PCRs were set up in a 96-well PCR plate, with each 25- $\mu$ L reaction containing 1X HF Phusion buffer, 4% DMSO, 400  $\mu$ M dNTPs, 0.1 ng/ $\mu$ L template plasmid, 0.4 units Phusion DNA polymerase, 3  $\mu$ M degenerate forward primer, and 3  $\mu$ M reverse primer. The reaction conditions were programmed as follows: 98 °C denaturation for 2 min; 25 cycles of 98 °C for 20 sec, 56 °C for 20 sec, 72 °C for 4.5 min; and a final 72 °C extension for 10 min. After amplification, 10  $\mu$ L of each PCR product was pooled in a single tube. The crude PCR product mixture was purified by gel extraction from a 0.8% agarose gel using Qiagen spin columns. Any residual template DNA was digested in 1X Cutsmart buffer with 2  $\mu$ L DpnI (NEB) overnight at 37 °C and removed with a PCR clean-up using Qiagen spin columns. The linear DNA fragments were phosphorylated in 1X T4 DNA ligase (NEB) buffer with 2  $\mu$ L PNK enzyme (NEB) at 37 °C for 30 min. T4 ligase enzyme (1  $\mu$ L, NEB) was added directly to the phosphorylation reaction and incubated at room temperature for 2 h. Salts were removed from the ligation reaction with a PCR clean-up using Qiagen spin columns. High efficiency electrocompetent 5- $\alpha$  *E. coli* cells (NEB) were transformed with 2  $\mu$ L of the clean DNA using standard electroporation protocols. Resulting colonies were grown up and minipreped to give a plasmid DNA library. *S. cerevisiae* strain BY4742 cells were prepared for transformation with the plasmid DNA library through a standard protocol for lithium acetate transformations. Transformed cells were plated on histidine dropout plates containing 2% glucose and incubated at 25 °C for 3 d. Resulting colonies were used directly in library screening.

**Multiple site-directed mutagenesis.** Forward primers were designed to flank desired mutation with >15 complementary nucleotides on either side of mutation and purchased from IDT (Supplemental Table S5). Equimolar amounts of each of the forward primers were combined and diluted down to 5  $\mu$ M. PCRs were performed with the QuikChange Lightning Multi Site-Directed Mutagenesis Kit (Agilent) according to their

recommended protocols. After amplification, 1  $\mu$ L of the supplied DpnI was added and the digestion reaction was incubated at 37 °C for 1 h. High efficiency electrocompetent 5-alpha *E. coli* cells (NEB) were transformed with 2  $\mu$ L of the digested reaction using standard electroporation protocols. Resulting colonies were grown up and minipreped to give a plasmid DNA library. *S. cerevisiae* strain BY4742 cells were prepared for transformation with the plasmid DNA library through a standard protocol for lithium acetate transformations. Transformed cells were plated on histidine dropout plates containing 2% glucose and incubated at 25 °C for 3 d. Resulting colonies were used directly in library screening.

**Supplemental Table S4.** Primers used for site-saturation mutagenesis of KtnC active site residues. Primers from round 1 (Rd1) were reused in subsequent rounds unless the sequence lost complementarity to the template DNA due to new mutations being carried forward. Codons that were edited to accommodate mutations added to the template DNA are highlighted in red.

| Mutation |         | Forward primer (5' to 3')     | Reverse primer (5' to 3') |                           |
|----------|---------|-------------------------------|---------------------------|---------------------------|
| R62X     | Rd1-fwd | NNKCAAAGCTACGATGGAAGCG        | Rd1-rvs                   | CATGTAGCTACCCTCGTCTACAATC |
| K64X     | Rd1-fwd | NNKCTACGATGGAAGCGCTTCG        | Rd1-rvs                   | TGGCCGCATGTAGCTACCC       |
| L65X     | Rd1-fwd | NNKCGATGGAAGCGCTTCGA          | Rd1-rvs                   | CTTTGGCCGCATGTAGCTAC      |
| R66X     | Rd1-fwd | NNKTGGAAGCGCTTCGATGC          | Rd1-rvs                   | TAGCTTTGGCCGCATGTAGC      |
| W67X     | Rd1-fwd | NNKAAGCGCTTCGATGCGG           | Rd1-rvs                   | TCGTAGCTTTGGCCGCA         |
| K68X     | Rd1-fwd | NNKCGCTTCGATGCGGAGAA          | Rd1-rvs                   | CCATCGTAGCTTTGGCCG        |
| R69X     | Rd1-fwd | NNKTTCGATGCGGAGAAAGAGTATG     | Rd1-rvs                   | CTTCCATCGTAGCTTTGGCC      |
| F70X     | Rd1-fwd | NNKGATGCGGAGAAAGAGTATGCG      | Rd1-rvs                   | GCGCTTCCATCGTAGCTTTG      |
| D71X     | Rd1-fwd | NNKCGGAGAAAGAGTATGCGAGA       | Rd1-rvs                   | GAAGCGCTTCCATCGTAGC       |
| A72X     | Rd1-fwd | NNKGAGAAAGAGTATGCGAGAGCATATC  | Rd1-rvs                   | ATCGAAGCGCTTCCATCG        |
| E73X     | Rd1-fwd | NNKAAAGAGTATGCGAGAGCATATCAGC  | Rd1-rvs                   | CGCATCGAAGCGCTTCC         |
| Y76X     | Rd1-fwd | NNKCGAGAGCATATCAGCAGTACA      | Rd1-rvs                   | CTCTTTCTCCGCATCGAAGC      |
| R93X     | Rd1-fwd | NNKATGCAGAATGATAATTATGGCATTG  | Rd1-rvs                   | GATCGCATAAGGTTTCCCTGC     |
| M94X     | Rd1-fwd | NNKAGAAATGATAATTATGGCATTGTGC  | Rd1-rvs                   | CCGGATCGCATAAGGTTTCC      |
| Q95X     | Rd1-fwd | NNKAATGATAATTATGGCATTGTGCTTC  | Rd1-rvs                   | CATCCGGATCGCATAAGGTT      |
| D97X     | Rd1-fwd | NNKAATTATGGCATTGTGCTTCCC      | Rd1-rvs                   | ATTCTGCATCCGGATCGC        |
| Y99X     | Rd1-fwd | NNKGGCATTGTGCTTCCCTTAAAC      | Rd1-rvs                   | ATTATCATTCGTCATCCGGATCG   |
| I101X    | Rd1-fwd | NNKGTGCTTCCCTTAAACTCAGCAA     | Rd1-rvs                   | GCCATAATTATCATTCGTCATCCG  |
| W111X    | Rd1-fwd | NNKAGGTCTCTACCACACGACCAGC     | Rd1-rvs                   | TTCCTTTGCTGAGTTTAAGGGA    |
| R112X    | Rd1-fwd | NNKTCTCTACCACACGACCAGCTG      | Rd1-rvs                   | CCATTCCCTTTGCTGAGTTTAAGG  |
| S120X    | Rd1-fwd | NNKTCTCTCAAGCCTTGCCAGA        | Rd1-rvs                   | CAGCTGGTGGTGTGGTAGAGA     |
| F121X    | Rd1-fwd | NNKCTTCAAGCCTTGCCAGAGTTT      | Rd1-rvs                   | GCTCAGCTGGTGGTGTGGT       |
| L122X    | Rd1-fwd | NNKCAAGCCTTGCCAGAGTTTGC       | Rd1-rvs                   | AAAGCTCAGCTGGTGGTGGT      |
| Q123X    | Rd1-fwd | NNKGCCTTGCCAGAGTTTGC          | Rd1-rvs                   | AAGAAAGCTCAGCTGGTGGT      |
| A124X    | Rd1-fwd | NNKTGCCAGAGTTTGCCGATAT        | Rd1-rvs                   | TTGAAGAAAGCTCAGCTGGTGG    |
| L125X    | Rd1-fwd | NNKGCAGAGTTTGCCGATATGAACA     | Rd1-rvs                   | GGCTTGAAGAAAGCTCAGCTG     |
| A126X    | Rd1-fwd | NNKAGATTGCGGATATGAACATGTAC    | Rd1-rvs                   | CAAGGCTTGAAGAAAGCTCAGC    |
| E127X    | Rd1-fwd | NNKTGCGGATATGAACATGTACTGC     | Rd1-rvs                   | TGCCAAGGCTTGAAGAAAGC      |
| F128X    | Rd1-fwd | NNKCGGATATGAACATGTACTGCG      | Rd1-rvs                   | CTCTGCCAAGGCTTGAAGAAA     |
| A129X    | Rd1-fwd | NNKGATATGAACATGTACTGCGACGTC   | Rd1-rvs                   | AAACTGCGCAAGGCTTGAAG      |
| D130X    | Rd1-fwd | NNKATGAACATGTACTGCGACGTC      | Rd1-rvs                   | CGCAAACCTGCCAAGC          |
| M131X    | Rd1-fwd | NNKAACATGTACTGCGACGTCACG      | Rd1-rvs                   | ATCCGCAAACCTGCCAAG        |
| N132X    | Rd1-fwd | NNKATGTACTGCGACGTCACGGA       | Rd1-rvs                   | CATATCCGCAAACCTGCCA       |
| M133X    | Rd1-fwd | NNKTACTGCGACGTCACGACA         | Rd1-rvs                   | GTTTCATATCCGCAAACCTGCC    |
| Y134X    | Rd1-fwd | NNKTGCGACGTCACGACAGG          | Rd1-rvs                   | CATGTTTCATATCCGCAAACCTG   |
| D139X    | Rd1-fwd | NNKAGGACACCCATTGAAGCTGTT      | Rd1-rvs                   | CGTGACGTCGCAGTACATGTT     |
|          | Rd4-fwd | NNKAGGACACCGCATTTGAAGCTGTT    |                           |                           |
| P142X    | Rd1-fwd | NNKATTGAAGCTGTTTCATAGTTGCAACA | Rd1-rvs                   | TGTCCTGTCCGTGACGTCG       |
| I143X    | Rd1-fwd | NNKGAAGCTGTTTCATAGTTGCAACAAC  | Rd1-rvs                   | GGGTGTCTGTCCGTGACG        |
|          |         |                               | Rd4-rvs                   | CGGTGTCTGTCCGTGACG        |
| V146X    | Rd1-fwd | NNKCATAGTTGCAACAACGCTGAATC    | Rd1-rvs                   | AGCTTCAATGGGTGTCCTGTC     |
|          |         |                               | Rd4-rvs                   | AGCTTCAATCGGTGTCCTGTC     |
| L203X    | Rd1-fwd | NNKCTCGGACCAGATACAGCCCC       | Rd1-rvs                   | CAAGGCCATAGTAACCGTTGAG    |
| R232X    | Rd1-fwd | NNKACGGGATATCCGCGCA           | Rd1-rvs                   | TCGATAACAACGTCATAATTGC    |
| G234X    | Rd1-fwd | NNKTATCCGCGCATCCTGCG          | Rd1-rvs                   | CGTTTCGTCGATAACAACGCTC    |
| Y235X    | Rd1-fwd | NNKCGCGCATCCTGCG              | Rd1-rvs                   | TCCCGTTCGTCGATAACAAC      |

| Mutation |         | Forward primer (5' to 3')        |         | Reverse primer (5' to 3')   |
|----------|---------|----------------------------------|---------|-----------------------------|
| P236X    | Rd1-fwd | NNKCGCATCCTGCGGCCA               | Rd1-rvs | ATATCCCCTTCGTCGATAACAA      |
| R237X    | Rd1-fwd | NNKATCCTGCGCCATTCGT              | Rd1-rvs | CGGATATCCCCTTCGTCG          |
| I238X    | Rd1-fwd | NNKCTGCGGCCATTTCGTGTG            | Rd1-rvs | GCGCGGATATCCCCTTC           |
| L239X    | Rd1-fwd | NNKCGCCATTCGTGTGGC               | Rd1-rvs | GATGCGCGGATATCCCG           |
| R240X    | Rd1-fwd | NNKCCATTTCGTGTGGCGCTT            | Rd1-rvs | CAGGATGCGCGGATATCC          |
| P241X    | Rd1-fwd | NNKTCGTGTGGCGCTTTTCG             | Rd1-rvs | CCGCAGGATGCGCGG             |
| F242X    | Rd1-fwd | NNKGTGTGGCGCTTTTCGTCC            | Rd1-rvs | TGGCCGCAGGATGCG             |
| L253X    | Rd1-fwd | NNKAGGAAACACTTATCTCTCGTGAGAGA    | Rd1-rvs | ATTTCCGCATTCGGACGA          |
| D321X    | Rd1-fwd | NNKGATCTCATTTCCTACCATTTCGAAC     | Rd1-rvs | TGCCAGCAACTGTACCTGTGC       |
|          | Rd2-fwd | NNKGATCTCATTTCCTACCATTTCATGC     |         |                             |
|          | Rd3-fwd | NNKGAGCTCATTTCCTACCATTTCATGC     |         |                             |
| D322X    | Rd1-fwd | NNKTCATTTTCCTACCATTTCGAACTCTG    | Rd1-rvs | ATCTGCCAGCAACTGTACCTGT      |
|          | Rd2-fwd | NNKTCATTTTCCTACCATTTCATGCCTCTG   |         |                             |
|          | Rd7-fwd | NNKTCATTTTCCTACCATTTCGAACTCCG    |         |                             |
| L323X    | Rd1-fwd | NNKATTTTCCTACCATTTCGAACTCTGTAAA  | Rd1-rvs | ATCATCTGCCAGCAACTGTACC      |
|          | Rd2-fwd | NNKATTTTCCTACCATTTCATGCCTCTGTAAA | Rd3-rvs | CTCATCTGCCAGCAACTGTACC      |
|          | Rd7-fwd | NNKATTTTCCTACCATTTCGAACTCCGTAAA  |         |                             |
| I324X    | Rd1-fwd | NNKTCCTACCATTTCGAACTCTGTAAACC    | Rd1-rvs | GAGATCATCTGCCAGCAACTGT      |
|          | Rd2-fwd | NNKTCCTACCATTTCATGCCTCTGTAAACC   | Rd3-rvs | GAGCTCATCTGCCAGCAACTGT      |
|          | Rd7-fwd | NNKTCCTACCATTTCGAACTCCGTAAACC    |         |                             |
| F325X    | Rd1-fwd | NNKTACCATTTCGAACTCTGTAAACCG      | Rd1-rvs | AATGAGATCATCTGCCAGCAAC      |
|          | Rd2-fwd | NNKTACCATTTCATGCCTCTGTAAACCG     | Rd3-rvs | AATGAGCTCATCTGCCAGCAAC      |
|          | Rd7-fwd | NNKTACCATTTCGAACTCCGTAAACCG      |         |                             |
| Y326X    | Rd1-fwd | NNKCATTTTCGAACTCTGTAAACCGAC      | Rd1-rvs | GAAAATGAGATCATCTGCCAGC      |
|          | Rd2-fwd | NNKCATTTTCATGCCTCTGTAAACCGAC     | Rd3-rvs | GAAAATGAGCTCATCTGCCAGC      |
|          | Rd7-fwd | NNKCATTTTCGAACTCCGTAAACCGAC      |         |                             |
| H327X    | Rd1-fwd | NNKTCGAACTCTGTAAACCGACCG         | Rd1-rvs | GTAGAAAATGAGATCATCTGCCAGC   |
|          | Rd2-fwd | NNKTCATGCCTCTGTAAACCGACCG        | Rd3-rvs | GTAGAAAATGAGCTCATCTGCCAGC   |
|          | Rd7-fwd | NNKTCGAACTCCGTAAACCGACCG         |         |                             |
| F328X    | Rd1-fwd | NNKGAACCTCTGTAAACCGACCGCA        | Rd1-rvs | ATGGTAGAAAATGAGATCATCTGCC   |
|          | Rd2-fwd | NNKATGCCTCTGTAAACCGACCGCA        | Rd3-rvs | ATGGTAGAAAATGAGCTCATCTGCC   |
|          | Rd7-fwd | NNKGAACCTCCGTAAACCGACCGCA        |         |                             |
| E329X    | Rd1-fwd | NNKCTCTGTAAACCGACCGCATTC         | Rd1-rvs | GAAATGGTAGAAAATGAGATCATCTG  |
|          | Rd4-fwd | NNKCTCTGTAAACCGACCGCATAC         | Rd3-rvs | GAAATGGTAGAAAATGAGCTCATCTG  |
|          | Rd7-fwd | NNKCTCCGTAAACCGACCGCATTC         |         |                             |
| L330X    | Rd1-fwd | NNKTGTAAACCGACCGCATTCAA          | Rd1-rvs | TTCGAAATGGTAGAAAATGAGATCA   |
|          | Rd4-fwd | NNKTGTAAACCGACCGCATACAA          | Rd2-rvs | CATGAAATGGTAGAAAATGAGATCA   |
|          | Rd7-fwd | NNKCGTAAACCGACCGCATTCAA          | Rd3-rvs | CATGAAATGGTAGAAAATGAGCTCA   |
| C331X    | Rd1-fwd | NNKAAACCGACCGCATTCACA            | Rd1-rvs | GAGTTCGAAATGGTAGAAAATGAGA   |
|          | Rd4-fwd | NNKAAACCGACCGCATACACA            | Rd2-rvs | GAGCATGAAATGGTAGAAAATGAGA   |
|          |         |                                  | Rd3-rvs | GAGCATGAAATGGTAGAAAATGAGC   |
| K332X    | Rd1-fwd | NNKCCGACCGCATTCACATCA            | Rd1-rvs | ACAGAGTTCGAAATGGTAGAAAATG   |
|          | Rd4-fwd | NNKCCGACCGCATACACATCA            | Rd2-rvs | ACAGAGCATGAAATGGTAGAAAATG   |
|          |         |                                  | Rd7-rvs | ACGGAGTTCGAAATGGTAGAAAATG   |
| P333X    | Rd1-fwd | NNKACCGCATTCACATCATCTTCC         | Rd1-rvs | TTTACAGAGTTCGAAATGGTAGAAAAT |
|          | Rd4-fwd | NNKACCGCATACACATCATCTTCC         | Rd2-rvs | TTTACAGAGCATGAAATGGTAGAAAAT |
|          |         |                                  | Rd7-rvs | TTTACGGAGTTCGAAATGGTAGAAAAT |
| T334X    | Rd1-fwd | NNKGCATTCAACATCATCTTCCAGC        | Rd1-rvs | CGGTTTACAGAGTTCGAAATGG      |
|          | Rd4-fwd | NNKGCATACACATCATCTTCCAGC         | Rd2-rvs | CGGTTTACAGAGCATGAAATGG      |
|          |         |                                  | Rd7-rvs | CGGTTTACGGAGTTCGAAATGG      |
| F336X    | Rd1-fwd | NNKAACATCATCTTCCAGCTGTATGC       | Rd1-rvs | TGCGGTTCGGTTTACAGAGTTC      |
|          |         |                                  | Rd2-rvs | TGCGGTTCGGTTTACAGAGCAT      |
|          |         |                                  | Rd7-rvs | TGCGGTTCGGTTTACGGAGTTC      |
| D393X    | Rd1-fwd | NNKATCTCCGGTTTGTTCAGCTTTC        | Rd1-rvs | GTACAGTCGAAAGGTCCTCTTGT     |
| I394X    | Rd1-fwd | NNKTCGGTTTGTTCAGCTTTCG           | Rd1-rvs | ATCGTACAGTCGAAAGGTCCTCT     |
| S395X    | Rd1-fwd | NNKGGTTTGTTCAGCTTTCGCCG          | Rd1-rvs | GATATCGTACAGTCGAAAGGTCCTC   |
|          | Rd7-fwd | NNKGGTTTGTTCAGCTTTCGGCG          |         |                             |
| G396X    | Rd1-fwd | NNKTTGTTCAGCTTTCGCCGTG           | Rd1-rvs | GGAGATATCGTACAGTCGAAAGGT    |
|          | Rd7-fwd | NNKTTGTTCAGCTTTCGGCGTG           |         |                             |
| F397X    | Rd1-fwd | NNKGTTCAGCTTTCGCCGTGTCA          | Rd1-rvs | ACCGGAGATATCGTACAGTCGA      |

| Mutation | Forward primer (5' to 3')                   | Reverse primer (5' to 3')                |
|----------|---------------------------------------------|------------------------------------------|
| V398X    | Rd7-fwd NNKGTTCAGCTTT <b>CGG</b> CGTGTCA    | Rd1-rvs AAAACCGGAGATATCGTACAGTCG         |
|          | Rd1-fwd NNKAGCTTTCGCCGTGTGCATGA             |                                          |
| S399X    | Rd7-fwd NNKAGCTTTC <b>CGG</b> CGTGTGCATGA   | Rd1-rvs GACAAAACCGGAGATATCGTACA          |
|          | Rd1-fwd NNKTTCGCCGTGTGCATGAAACC             |                                          |
| F400X    | Rd7-fwd NNKTTC <b>CGG</b> CGTGTGCATGAAACC   | Rd1-rvs GCTGACAAAACCGGAGATATCG           |
|          | Rd1-fwd NNKCGCCGTGTGCATGAAACCTC             |                                          |
| R401X    | Rd7-fwd NNK <b>CGG</b> CGTGTGCATGAAACCTC    | Rd1-rvs AAAGCTGACAAAACCGGAGATA           |
|          | Rd1-fwd NNKCGTGTGCATGAAACCTCTACTCTAAA       |                                          |
| I421X    | Rd1-fwd NNKTATTGTCTCCATGTCCGAATGT           | Rd1-rvs TGTACCGGGACGAAGAGACA             |
| L422X    | Rd1-fwd NNKTGTCTCCATGTCCGAATGTCC            | Rd1-rvs GATTGTACCGGGACGAAGAGA            |
| L423X    | Rd1-fwd NNKTCTCCATGTCCGAATGTCCA             | Rd1-rvs TAAGATTGTACCGGGACGAAGA           |
| S424X    | Rd1-fwd NNKCCATGTCCGAATGTCCATTTG            | Rd1-rvs CAATAAGATTGTACCGGGACGA           |
| P425X    | Rd1-fwd NNKTGTCCGAATGTCCATTTGGA             | Rd1-rvs AGACAA TAAGATTGTACCGGGACG        |
| C426X    | Rd1-fwd NNKCGAATGTCCATTGGATCC               | Rd1-rvs TGGAGACAATAAGATTGTACCGG          |
| T468X    | Rd1-fwd NNKT TTTCTCATGGAGCGGGC              | Rd1-rvs CAAGAACGTGAGCGAGGTGG             |
| F469X    | Rd1-fwd NNKTCTCATGGAGCGGGCAG                | Rd1-rvs TGTCAAGAACGTGAGCGAGG             |
|          |                                             | Rd7-rvs <b>TGA</b> CAAGAACGTGAGCGAGG     |
| S470X    | Rd1-fwd NNKCATGGAGCGGGCAGCT                 | Rd1-rvs AAATGTCAAGAACGTGAGCGGA           |
|          |                                             | Rd7-rvs AAAT <b>TGA</b> CAAGAACGTGAGCGGA |
| A473X    | Rd1-fwd NNKGGCAGCTGTCCCGCG                  | Rd1-rvs TCCATGAGAAAA TGTCAAGAACG         |
|          |                                             | Rd7-rvs TCCATGAGAAAA <b>TGA</b> CAAGAACG |
| G474X    | Rd1-fwd NNKAGCTGTCCCGCGCGG                  | Rd1-rvs CGCTCCATGAGAAAATGTCAA            |
|          |                                             | Rd7-rvs CGCTCCATGAGAAAAT <b>TGA</b> CAA  |
| S475X    | Rd1-fwd NNKTGTCCCGCGCGGG                    | Rd1-rvs GCCCGTCCATGAGAAAA                |
| P477X    | Rd1-fwd NNKGC CGGGTTCTCGCT                  | Rd1-rvs ACAGCTGCCCGCTCCA                 |
| F511X    | Rd1-fwd NNKACCAGTGGTCCGGTCTATATGC           | Rd1-rvs TCCATAGGGTAGTATCTCCTTCTGC        |
|          | Rd3-fwd NNKACC <b>AGG</b> GGTCCGATGTATATGC  |                                          |
| T512X    | Rd1-fwd NNKAGTGGTCCGGTCTATATGCCTAA          | Rd1-rvs GAATCCATAGGGTAGTATCTCCTTCTG      |
|          | Rd3-fwd NNK <b>AGG</b> GGTCCGATGTATATGCCTAA |                                          |
| S513X    | Rd1-fwd NNKGGTCCGGTCTATATGCCTAATCC          | Rd1-rvs GGTGAATCCATAGGGTAGTATCTCC        |
|          | Rd3-fwd NNKGGTCCGATGTATATGCCTAATCC          |                                          |
| G514X    | Rd1-fwd NNKCCGGTCTATATGCCTAATCCATC          | Rd1-rvs ACTGGTGAATCCATAGGGTAGTATCT       |
|          | Rd3-fwd NNKCCGATGTATATGCCTAATCCATC          |                                          |
| P515X    | Rd1-fwd NNKGTCTATATGCCTAATCCATCAGTGATG      | Rd1-rvs ACCACTGGTGAATCCATAGGG            |
|          | Rd3-fwd NNKATGTATATGCCTAATCCATCAGTGATG      |                                          |
| V516X    | Rd1-fwd NNKTATATGCCTAATCCATCAGTGATGA        | Rd3-rvs ACCCTGGTGAATCCATAGGG             |
|          |                                             | Rd1-rvs CGGACCCTGGTGAATCCA               |
| Y517X    | Rd1-fwd NNKATGCCTAATCCATCAGTGATGATG         | Rd3-rvs CGGACCCTGGTGAATCCA               |
|          |                                             | Rd1-rvs GACCGACCATTGGTGAATC              |
| M518X    | Rd1-fwd NNKCTAATCCATCAGTGATGATGAGA          | Rd3-rvs <b>CAT</b> CGGACCCTGGTGAATC      |
|          |                                             | Rd1-rvs ATAGACCGGACCATTGGTGAA            |
|          |                                             | Rd3-rvs ATACATCGGACCCTGGTGAA             |

**Supplemental Table S5.** Primers for multiple site-directed mutagenesis combinatorial libraries. Mutated codons highlighted in red.

| Mutation(s)  | Primer (5' to 3')                                                        |
|--------------|--------------------------------------------------------------------------|
| L122X, A124S | Rd2-combi-1 CGACCAGCTGAGCTTTNNKCAA <b>TCC</b> TGGCAGAGTTTGC              |
| I143R        | Rd2-combi-2 CGGACAGGACACCC <b>AGG</b> GAAGCTGTTCATAGTTGCAAC              |
| L253G        | Rd2-combi-3 CGTCCGAATGCCGAAAT <b>GGG</b> AGGAAACACTTATCTCTCGTG           |
| D322E        | Rd2-combi-4 CAGTTGCTGGCAGAT <b>GAG</b> CTCATTTTCTACCATTTCATGC            |
| S513R, V516M | Rd2-combi-5 CTACCCATATGGATTACC <b>AGG</b> GGTCCGATGTATATGCCTAATCCATCAGTG |
| P142R        | Rd3-combi-1 GACGTCACGGACAGGACA <b>CGC</b> ATTGAAGCTGTTTCATAG             |
| P142G        | Rd3-combi-2 GACGTCACGGACAGGACA <b>GGC</b> ATTGAAGCTGTTTCATAG             |
| V146A        | Rd3-combi-3 GACACCCATTGAAGCT <b>GCT</b> CATAGTTGCAACAACG                 |
| F336Y        | Rd3-combi-4 CTGTAAACCGACCGCA <b>TACA</b> ACATCATCTTCCAGC                 |
| M516V        | Rd3-combi-5 CCTATGGATTACCAGGGGTCCG <b>GTG</b> TATATGCCTAATCC             |
| R513M        | Rd3-combi-6 CCTATGGATTACC <b>AGT</b> GGTCCGATGTATATGCCTAATCC             |
| Q95T         | Rd4-combi-1 GAAACCTTATGCGATCCGGATG <b>ACG</b> AATGATAATATGGCATTG         |
| V146A        | Rd4-combi-2 GACACGCATTGAAGCT <b>GCT</b> CATAGTTGCAACAACG                 |



|              |              |                                                                   |
|--------------|--------------|-------------------------------------------------------------------|
| I324A        | Rd4-combi-3  | GCTGGCAGATGAGCTC <b>GCT</b> TTCTACCATTTTCATGCTC                   |
| F325L        | Rd4-combi-4  | GGCAGATGAGCTCATT <b>TTGT</b> ACCATTTTCATGCTCTGTAAAC               |
| G396W        | Rd4-combi-5  | CGACTGTACGATATCTCC <b>TGG</b> TTTGT CAGCTTTCGCCG                  |
| T468S        | Rd4-combi-6  | CACCTCGCTCACGTTCTT <b>GTCA</b> TTTTCTCATGGAGC                     |
| M516V        | Rd4-combi-7  | GATTACCAGGGGTCCG <b>GTTG</b> TATATGCCTAATC                        |
| Q95T         | Rd5-combi-1  | GAAACCTTATGCGATCCGGATG <b>ACGA</b> ATGATAATTATGGCATTG             |
| W111M        | Rd5-combi-2  | CTTAAACTCAGCAAAGGAA <b>ATG</b> AGGTCTCTACCACACGACC                |
| W111T        | Rd5-combi-3  | CTTAAACTCAGCAAAGGAA <b>ACG</b> AGGTCTCTACCACACGACC                |
| V146A        | Rd5-combi-4  | GACACGCATTGAAGCT <b>GCT</b> CATAGTTGCAACAACG                      |
| L253V        | Rd5-combi-5  | CTTTTCGTCCGAATGCCGAAAT <b>GTT</b> AGGAAACACTTATCTCTCGTG           |
| C331R        | Rd5-combi-6  | CATTTTCTACCATTTTCATGCTC <b>CGT</b> AAACCGACCGCATACAAC             |
| R401Q        | Rd5-combi-7  | CCTGGTTTGT CAGCTTT <b>CAG</b> CGTGT CATGAAACCTCTTAC               |
| Q95T         | Rd6-combi-1  | CCTTATGCGATCCGGATG <b>ACGA</b> ATGATAATTATGGCATTGTG               |
| I143R        | Rd6-combi-2  | CGGACAGGACACGC <b>CGT</b> GAAGCTGTT CATAGTTG                      |
| I143R, V146A | Rd6-combi-3  | CGGACAGGACACGC <b>CGT</b> GAAGCT <b>GCT</b> CATAGTTGCAAC          |
| V146A        | Rd6-combi-4  | GACACGCATTGAAGCT <b>GCT</b> CATAGTTGCAACAACG                      |
| L253V        | Rd6-combi-5  | GTCCGAATGCCGAAAT <b>GTG</b> AGGAAACACTTATCTC                      |
| I324A        | Rd6-combi-6  | CAGTTGCTGGCAGATGAGCTC <b>GCT</b> TTCTACCATTTT                     |
| M329E        | Rd6-combi-7  | TTTTCTACCATTTT <b>CAG</b> CTCCGTAAACCGACCGCATACAAC                |
| M329E, R331C | Rd6-combi-8  | TTTTCTACCATTTT <b>CAG</b> CTCT <b>GT</b> AAACCGACCGCATACAACATCATC |
| R331C        | Rd6-combi-9  | CTACCATTTTCATGCTCTGTAAACCGACCGCATAC                               |
| W396G        | Rd6-combi-10 | GACTGTACGATATCTCC <b>GGG</b> TTTGT CAGCTTTT                       |
| W396V        | Rd6-combi-11 | CCTTTCGACTGTACGATATCTCC <b>GTG</b> TTTGT CAGCTTTT                 |
| Q401R        | Rd6-combi-12 | GTTTGT CAGCTTT <b>CGG</b> CGTGT CATGAAACCTC                       |
| T468S        | Rd6-combi-13 | CTCGCTCACGTTCTT <b>GTCA</b> TTTTCTCATGGAGC                        |
| R69A         | Rd7-combi-1  | CAAAGCTACGATGGAAG <b>GCC</b> TTTCGATGCGGAGAAAG                    |
| R69K         | Rd7-combi-2  | GCCAAAGCTACGATGGAAG <b>AAG</b> TTTCGATGCGGAGAAAGAGTATG            |
| L122G        | Rd7-combi-3  | GACCAGCTGAGCTTT <b>GGT</b> CAAGCCTTGGCAGAGTTTG                    |
| L122G, A126G | Rd7-combi-4  | GACCAGCTGAGCTTT <b>GGT</b> CAAGCCTT <b>GGA</b> GAGTTTGCGG         |
| A126G        | Rd7-combi-5  | CTTTCTTCAAGCCTTG <b>GGA</b> GAGTTTGCGGATATG                       |
| I143R        | Rd7-combi-6  | CGGACAGGACACGC <b>CGT</b> GAAGCTGTT CATAGTTG                      |
| T334R        | Rd7-combi-7  | CATGCTCCGTAAACCG <b>CGC</b> GCATACAACATCATCTTC                    |
| W396G        | Rd7-combi-8  | GACTGTACGATATCTCC <b>GGG</b> TTTGT CAGCTTTT                       |
| L422G        | Rd7-combi-9  | CGTCCCGGTACAAT <b>GGA</b> TTGTCTCCATGTCCG                         |
| A473K        | Rd7-combi-10 | GTCATTTTCTCATGGA <b>AAG</b> GGCAGCTGTCCCGCG                       |
| Y517S        | Rd7-combi-11 | CCAGGGGTCCGATG <b>AGT</b> ATGCC TAATCCATCAGTG                     |

## **Screening protein libraries**

**High throughput biotransformations.** Histidine dropout minimal media containing 4% glucose was added to each well of up to 20 sterile 96-well culture plates (VWR) to a volume of 500  $\mu$ L. *S. cerevisiae* library colonies were inoculated into each well of the plate except for row E, which was reserved for *S. cerevisiae* KtnC template control colonies. Cultures were grown overnight at 30 °C with shaking at 300 rpm. Culture plates were centrifuged at 1,000 x *g* for 10 min to pellet cells and the growth media was removed. Cells were resuspended with 250  $\mu$ L of histidine dropout minimal media containing 6% galactose and 100-750  $\mu$ M each substrate. Biotransformations were incubated at 30 °C with shaking at 300 rpm for 2-3 days. Reactions were quenched with the addition of 2 equivalents of methanol and centrifugation at 1,000 x *g* for 10 min. The resulting supernatant was used for mass spectrometry analysis.

**High throughput RapidFire-MS screen for activity.** Library reactions were analyzed for total cross-coupling activity in a high-throughput tier 1 screening using an Agilent RapidFire 365 High throughput Mass Spectrometry System linked to an Agilent 6545 LC/Q-TOF. Library samples were prepared by diluting the library samples 2:1 in water containing 600 nM 2,6'-dihydroxyacetophenone (internal standard) in shallow 96-well plates (Axygen) and heat-sealed with pierceable aluminum covers (Agilent). Each RapidFire injection was programmed as follows: 0.6 s to aspirate the sample, 3 s to load the sample onto the C4 cartridge with water (0.5 mL/min), 8 s to elute the sample from the cartridge using 90% acetonitrile buffered with 10 mM ammonium formate pH 8 (0.8 mL/min), and 0.5 s to reequilibrate. A blank injection was included after each sample injection to reduce carry-over between library reactions.

The peak areas for the extracted ion chromatograms for internal standard, substrate, and cross-coupled product were collected for each sample using the MassHunter Qualitative Analysis 10.0 software. The relative percent conversions to cross-coupled products were calculated and the average percent conversion resulting from the template reactions for each plate (n=10) was set to 1.0. The conversions for the variant reactions were normalized to the template reactions, giving fold improvement scores for each variant.

**LC-MS screen for selectivity.** Reactions were subjected to liquid chromatography PDA spectrometry (UPLC) analysis performed on an Agilent 6230 time of flight mass spectrometer with a Dual AJS ESI source and an Agilent 1290 Infinity Series II diode array detector, autosampler, and binary pump. The reaction products were separated and analyzed under the following conditions:

To determine site-selectivity of reaction, samples were analyzed by negative mode on a Waters Acquity Premier HSS T3 1.8  $\mu$ m C18, 2.1 x 50 mm column. Phase A = 95:5 water:acetonitrile; phase B = 95:5 acetonitrile: water. The pump was programmed as follows: 20% B held for 0.5 min, to 60% B over 1.0 min, hold at 90% B for 0.6 min. The flow rate was set to 0.7 mL/min flow rate, the column was heated to 45 °C, and each injection was followed by equilibration at 20% B for 0.5 min.

To determine atroposelectivity of reaction, samples were analyzed by negative mode on a Daicel Chiralpak IC-3, 4.6 x 150 mm, 3  $\mu$ m column. Phase A = 95:5 water:acetonitrile; phase B = 95:5 acetonitrile: water. The pump was programmed as follows: 50% B held for 2.25 min (1.5 mL/min), 100% B held over 0.5 min (2.5 mL/min), to 50% B over 0.5 min (2.5 mL/min).

The MassHunter software was used to extract ion chromatograms at the target masses to characterize the percent conversion and site-selectivity of the reactions. Variants that gave the desired activity and site-selectivity were carried forward to the hit validation and sequencing step.

**Hit validation and sequencing.** Hit variants selected validated by growing up glycerol stocks of the respective cells harboring the variants, repeating biotransformations (n=3), and analyzing reactions by TOF-LC-MS using previously described procedures. Variants that showed improvement over the template after validation were sequenced to identify the active site mutations. Plasmid DNA was isolated from *S. cerevisiae* using the Zymoprep Yeast Plasmid Miniprep II kit. The resulting plasmid DNA was used to transform DH5 $\alpha$  *E. coli* cells. Clean plasmid DNA was isolated from DH5 $\alpha$  cells using QIAGEN miniprep kit and sent to GENEWIZ for Sanger sequencing. The sequence for the top variant from each round was defined as LxC (Lara's cross-couplase) and used as the template for the following round.

## **Engineered LxC sequences**

### **LxC1 (E329M)**

ATGGCAGTTCATGTACCATTCAGCATCCACCACGTCGTGGATATCGGCATTTCCACC GGCCCGGTAGTCATTGTCCTCGTT  
CTCCTATTCGGGTGGCTGTCTGGGATCCGACAGCC TTGATGGATGGTGGCAGAAAAGAGCCTTGAGAGGCATTCCGATT  
GTAGACGAGGGTAGCTACATGCGGCCAAAGCTACGATGGAAGCGCTTCGATGCGGAGAAAGAGTATGCGAGAGCATA TCAG  
CAGTACACAAAAGCAGGGAAA CCTTATGC GATCCGGA TGCAGAATGATAATTA TGGCATTGTGCT TCCCTTAAACTCAGCA  
AAGGAATGGAGGTCTCTACCA CACGACCAGCTGAGCTTTCTTCAAGCCTTGGCAGAGTTTGCGGATATGAACATGTACTGC  
GACGT CACGGACAGGACACCCATTGAAGCTGTT CATAGTTGCAACAACGCTGAATCA TTAACAT CCTCAATAAGCTTCTC  
GCCCCGGAAACCGATACAGCC TTATCTCAGATT TTCGAGCAGCCTACAGGAAAAGAC TGAAGGAATTGAACA CACTGCAG  
ACAATCCTCTCCTTATGCTCAACGGTTACTATGGCCTTGCTCCTCGGACCAGATACAGCCCC TGACCCGGTGTCTCCACCAC  
CATTCGACGTCTTTTGGCGAAGCAA TTATGAGCAGTTGTTATCGACGAAACGGGATATCCGCGCATCTGCGGCCATTCTGTG  
TGGCGCTTTTCGTCCGAATGCCGAAATCTGAGGAAACACTTATCTCTCGTGAGAGAGAGACTTGTTCCTGAGGTTGCGCGC  
CGTGTGCGAGCTGCACGAGCGGCGGATAAAACCAAGGACGTACGCCATCTTCATTGTTGGACGC ACTGATCGCGGCCGCC  
TTCGACAACGGCAGCTTAAGCCAGATGACCAAGGCAGAAATGATGCAGCACAGGTACAGTTGCTGGCAGATGATCTCATT  
TTCTACCATTTCAATGCTCTGTAAACCGACCGCATTCACATCATCTTCCAGCTGTATGCCATCATGGACCACCCAGAGTAC  
AAGGCTCCTCTCCGAGAGGAGGCAC TCCAAGCCTTGAAGCTCACCAATGGTGA CTGGACCGTTGAAACTCTGAAGCAGCT  
CCCAAGTTAGAAA GCTTTACAAAGGAGACCTTTGAC TGTA CGATATCTCCGGTTTTGTCAGCTTTCGCCGTGTCATGAAA  
CCTCTTACTCTAAACTCCATCGGCC TGCTCTTTCGTC CCGGTACAATCTTATTGTCTCCATGTCG GAATGTCCATTTGGAT  
CCCGAGATCTATGAAGACCCGACAACTTTCAATGGCTACCGCTTC TACGACTCCAGCCGCGAGGTCTGCTCTCCACGCGTG  
GCAACCACCTCGCTCACGTTCTTGACATTTTCTCATGGAGCGGGCAGCTGTCCCGCGCGGGTTCTCGCTACTCAAATTTGT  
CGGACGATCTTCATCAAGTTCCTGTGTCAGTACGACGTAGAACCTGTGCAGAAAGGAGATAC TACCCTATGGATTCACCAGT  
GGTCCGGTCTATATGCC TAATCCATCAGT GATGATGAGAATCCGGCCAAGAAGTGACGGGAAG

MAVHV PFSIHHVVDIGI STGPVVIVLVLLFGLAVVGS DSLDGWWQKRALRGIP IVDEGSYMRPKLRWKRFD A EKEYARAYQ  
QYTKAGKPYAIRMQNDNYGIVLPLNSAKEWRSLPHDQLSFLQALAEFADNMNYCDVTDRTPIEAVHSCNNAESLNILNKLL  
ARETDALSQIFEQPTGKDWKELNTLQTI LSLCSTVTMALLLGPDTAPDPVLHHHSTSFGEAIMS SCYRRTGYPRILRPFV  
WRFSSECRNLRKHL SLVRERLVPEVARRVAAARAADKTKDVRPSS LLDALIAAAFDNGSLS PDDQGRNDAAQVQLLADDLI  
FYHFMLCKP TAFNIIFQLYAIMDHPEYKAPLRE EALQALKL TNGDWTVE TLKHAPKLESFTKETFRLYDISGFVSFRVMK  
PLTLNSIGLSLRPGTILLSPCRNVHLDPEIYEDPTTFNGYRFYDS SREVCSPRVATTSLTFLTFSHGAGSCPARVLA TQIC  
RTIFIKFLLQYDVEPVQKEILPYGFTSGPVYMPNPSVMMRI RPRSDGK

### **LxC2 (D322E, E329M, S513R, V516M)**

ATGGCAGTTCATGTACCATTCAGCATCCACCACGTCGTGGATATCGGCATTTCCACC GGCCCGGTAGTCATTGTCCTCGTT  
CTCCTATTCGGGTGGCTGTCTGGGATCCGACAGCC TTGATGGATGGTGGCAGAAAAGAGCCTTGAGAGGCATTCCGATT  
GTAGACGAGGGTAGCTACATGCGGCCAAAGCTACGATGGAAGCGCTTCGATGCGGAGAAAGAGTATGCGAGAGCATA TCAG  
CAGTACACAAAAGCAGGGAAA CCTTATGC GATCCGGA TGCAGAATGATAATTA TGGCATTGTGCT TCCCTTAAACTCAGCA  
AAGGAATGGAGGTCTCTACCA CACGACCAGCTGAGCTTTCTTCAAGCCTTGGCAGAGTTTGCGGATATGAACATGTACTGC  
GACGT CACGGACAGGACACCCATTGAAGCTGTT CATAGTTGCAACAACGCTGAATCA TTAACAT CCTCAATAAGCTTCTC  
GCCCCGGAAACCGATACAGCC TTATCTCAGATT TTCGAGCAGCCTACAGGAAAAGAC TGAAGGAATTGAACA CACTGCAG  
ACAATCCTCTCCTTATGCTCAACGGTTACTATGGCCTTGCTCCTCGGACCAGATACAGCCCC TGACCCGGTGTCTCCACCAC  
CATTCGACGTCTTTTGGCGAAGCAA TTATGAGCAGTTGTTATCGACGAAACGGGATATCCGCGCATCTGCGGCCATTCTGTG  
TGGCGCTTTTCGTCCGAATGCCGAAATCTGAGGAAACACTTATCTCTCGTGAGAGAGAGACTTGTTCCTGAGGTTGCGCGC  
CGTGTGCGAGCTGCACGAGCGGCGGATAAAACCAAGGACGTACGCCATCTTCATTGTTGGACGC ACTGATCGCGGCCGCC  
TTCGACAACGGCAGCTTAAGCCAGATGACCAAGGCAGAAATGATGCAGCACAGGTACAGTTGCTGGCAGATGAGCTCATT  
TTCTACCATTTCAATGCTCTGTAAACCGACCGCATTCACATCATCTTCCAGCTGTATGCCATCATGGACCACCCAGAGTAC  
AAGGCTCCTCTCCGAGAGGAGGCAC TCCAAGCCTTGAAGCTCACCAATGGTGA CTGGACCGTTGAAACTCTGAAGCAGCT  
CCCAAGTTAGAAA GCTTTACAAAGGAGACCTTTGAC TGTA CGATATCTCCGGTTTTGTCAGCTTTCGCCGTGTCATGAAA  
CCTCTTACTCTAAACTCCATCGGCC TGCTCTTTCGTC CCGGTACAATCTTATTGTCTCCATGTCG GAATGTCCATTTGGAT  
CCCGAGATCTATGAAGACCCGACAACTTTCAATGGCTACCGCTTC TACGACTCCAGCCGCGAGGTCTGCTCTCCACGCGTG  
GCAACCACCTCGCTCACGTTCTTGACATTTTCTCATGGAGCGGGCAGCTGTCCCGCGCGGGTTCTCGCTACTCAAATTTGT  
CGGACGATCTTCATCAAGTTCCTGTGTCAGTACGACGTAGAACCTGTGCAGAAAGGAGATAC TACCCTATGGATTCACCAGG  
GGTCCGATGTATATGCC TAATCCATCAGT GATGATGAGAATCCGGCCAAGAAGTGACGGGAAG

MAVHV PFSIHHVVDIGI STGPVVIVLVLLFGLAVVGS DSLDGWWQKRALRGIP IVDEGSYMRPKLRWKRFD AEKEYARAYQ  
QYTKAGKPYAIRMQNDNYGIVLPLNSAKEWRSLPHDQLSFLQALAEFADNMNYCDVTDRTPIEAVHSCNNAESLNILNKLL  
ARETDALSQIFEQPTGKDWKELNTLQTI LSLCSTVTMALLLGPDTAPDPVLHHHSTSFGEAIMS SCYRRTGYPRILRPFV  
WRFSSSECRNLRKHL SLVRERLVPEVARRVAAARAADKTKDVRPSSLLDALIAAAFNDNGSLS PDDQGRNDAAQVQLLAD ELI  
FYHFM LCKPTAFN I IFQLYAIMDHPEYKAPLREALQALKL TNGDWTVE TLKHAPKLESFTKETFRLYD ISGFV SFRVMK  
PLTLNSIGLSLRPGTILLSPCRNVHLDPEIYEDPTTFNGYRFYDS SREVCSPRVATT SLTFLTF SHGAGSCPARVLA TQIC  
RTIFIKFLLQYDVEPVQKEILPYGFT RGP MYMPNPSVMMRI RPRS DGK

### Lx3 (P142R, D322E, E329M, F336Y, S513R, V516M)

ATGGCAGTTCATGTACCATTCAGCATCCACCACGTCGTGGATATCGGCATTTCCACC GGCCCGGTAGTCATTGTCCTCGTT  
CTCCTATTCGGGT TGGC TGTCGTGGGATCCGACAGCC TTGATGGA TGGTGGCAGAAAAGAGCCTT GAGAGGCATTCCGATT  
GTAGACGAGGGTAGCTACATGCGGCCAAAGCTACGATGGAAGCGCTTCGATGCGGAGAAAGAGTATGCGAGAGCATA TCAG  
CAGTACACAAAAGCAGGGAAA CCTTATGC GATC CGGATGCA GAATGATAATTA TGGCATTGTGCT TCCCTTAAACTCAGCA  
AAGGAATGGAGGTCTCTACCA CACGACCAGCTGAGCTTTCTTCAAGCCTTGGCAGAGTTTGCGGA TATGAACA TGTA CTGC  
GACGT CACGGACAGGACA CGCATTGAAGCTGTT CATAGTTGCAACAACGCTGAATCA TTAACAT CCTCAATAAGCTTCTC  
GCCCCGAAAACCGATACAGCC TTATCTCAGATT TTCGAGCAGCCTACAGGAAAAGAC TGGAAGGAATTGAACACACTGCAG  
ACAATCCTCTCCTTATGCTCAACGGTTACTATGGCCTTGCTCCTCGGACCAGATACAGCCCCTGACCCGGTGC TCCACCAC  
CATTCGACGTCTTTTGCGGAAGCAAT TATGAGCAGTTGTTATCGACGAACGGGATATCCGCGCATCCTGCGGCATTCTGTG  
TGGCGCTTTTCGTCCGAATGC CGAAATCTGAGGAAACACTTATCTCTCGTGAGAGAGAGACTTGTTCCTGAGGTTGCGCGC  
CGTGTGCGAGCTGCACGAGCGGCGGATAAAACCAAGGACGTACGCCATCTTCATTGTTGGACGCACTGATCGCGCGGCC  
TTCGACAACGGCAGCTTAAGCCAGATGACCAAGGCAGAAATGATGCAGCACAGGTACAGTTGCTGGCAGAT GAGCTCATT  
TTCTACCATTTCA TGCTCTGTAAACCGACCGCA TACAACATCATCTTCCAGCTGTATGCCATCATGGACCACC CAGAGTAC  
AAGGCTCCTCTCCGAGAGGAGGCAC TCCAAGCCTTGAAGCTCACCAATGGTGA CTGGACCGTTGAAACTCTGAAGCAGCT  
CCCAAGTTAGAAA GCTTTACAAAGGAGACCTTTGAC TGTACGATATCTCCGGTTTGTG CAGCTTCGCCGTGTCATGAAA  
CCTCTTACTCTAAACTCCATCGGCC TGTCCTTCTCGTCCGGTACAATCTTATTGTCTCCATGTCG GAATGTCCATTTGGAT  
CCCGAGATCTATGAAGACCCGACAACTTTCAATGGCTACCGCTTCTACGACTCCAGCCGCGAGGTCTGCTCTCCACGCGTG  
GCAACCACCTCGCTCACGTTCTT GACATTTTCTCATGGAGCGGGCAGCTGTCCCGCGGGGTTCTCGCTACTCAAATTTGT  
CGGACGATCTTCATCAAGTTCCTGTGTCAGTACGACGTAGAACCTGTGCAGAAGGAGATAC TACCCTATGGATTCACC AGG  
GGTCCGATGTATATGCC TAATCCATCAGTGATGATGAGAATCCGGCCAAGAAGTGACGGGAAG

MAVHV PFSIHHVVDIGI STGPVVIVLVLLFGLAVVGS DSLDGWWQKRALRGIP IVDEGSYMRPKLRWKRFD AEKEYARAYQ  
QYTKAGKPYAIRMQNDNYGIVLPLNSAKEWRSLPHDQLSFLQALAEFADNMNYCDVTDRTPIEAVHSCNNAESLNILNKLL  
ARETDALSQIFEQPTGKDWKELNTLQTI LSLCSTVTMALLLGPDTAPDPVLHHHSTSFGEAIMS SCYRRTGYPRILRPFV  
WRFSSSECRNLRKHL SLVRERLVPEVARRVAAARAADKTKDVRPSSLLDALIAAAFNDNGSLS PDDQGRNDAAQVQLLAD ELI  
FYHFM LCKPTAFN I IFQLYAIMDHPEYKAPLREALQALKL TNGDWTVE TLKHAPKLESFTKETFRLYD ISGFV SFRVMK  
PLTLNSIGLSLRPGTILLSPCRNVHLDPEIYEDPTTFNGYRFYDS SREVCSPRVATT SLTFLTF SHGAGSCPARVLA TQIC  
RTIFIKFLLQYDVEPVQKEILPYGFT RGP MYMPNPSVMMRI RPRS DGK

### Lx4 (P142R, D322E, E329M, F336Y, G396W, S513R, V516M)

ATGGCAGTTCATGTACCATTCAGCATCCACCACGTCGTGGATATCGGCATTTCCACC GGCCCGGTAGTCATTGTCCTCGTT  
CTCCTATTCGGGT TGGC TGTCGTGGGATCCGACAGCC TTGATGGA TGGTGGCAGAAAAGAGCCTT GAGAGGCATTCCGATT  
GTAGACGAGGGTAGCTACATGCGGCCAAAGCTACGATGGAAGCGCTTCGATGCGGAGAAAGAGTATGCGAGAGCATA TCAG  
CAGTACACAAAAGCAGGGAAA CCTTATGC GATC CGGATGCA GAATGATAATTA TGGCATTGTGCT TCCCTTAAACTCAGCA  
AAGGAATGGAGGTCTCTACCA CACGACCAGCTGAGCTTTCTTCAAGCCTTGGCAGAGTTTGCGGA TATGAACA TGTA CTGC  
GACGT CACGGACAGGACA CGCATTGAAGCTGTT CATAGTTGCAACAACGCTGAATCA TTAACAT CCTCAATAAGCTTCTC  
GCCCCGAAAACCGATACAGCC TTATCTCAGATT TTCGAGCAGCCTACAGGAAAAGAC TGGAAGGAATTGAACACACTGCAG  
ACAATCCTCTCCTTATGCTCAACGGTTACTATGGCCTTGCTCCTCGGACCAGATACAGCCCCTGACCCGGTGC TCCACCAC  
CATTCGACGTCTTTTGCGGAAGCAAT TATGAGCAGTTGTTATCGACGAACGGGATATCCGCGCATCCTGCGGCATTCTGTG  
TGGCGCTTTTCGTCCGAATGC CGAAATCTGAGGAAACACTTATCTCTCGTGAGAGAGAGACTTGTTCCTGAGGTTGCGCGC  
CGTGTGCGAGCTGCACGAGCGGCGGATAAAACCAAGGACGTACGCCATCTTCATTGTTGGACGCACTGATCGCGCGGCC  
TTCGACAACGGCAGCTTAAGCCAGATGACCAAGGCAGAAATGATGCAGCACAGGTACAGTTGCTGGCAGAT GAGCTCATT  
TTCTACCATTTCA TGCTCTGTAAACCGACCGCA TACAACATCATCTTCCAGCTGTATGCCATCATGGACCACC CAGAGTAC  
AAGGCTCCTCTCCGAGAGGAGGCAC TCCAAGCCTTGAAGCTCACCAATGGTGA CTGGACCGTTGAAACTCTGAAGCAGCT

CCCAAGTTAGAAA GCTT TACAAAGGAGACCTTT CGACTGTACGATATCTCC TGGTTTGT CAGCTTTCGCCGTGTCATGAAA  
CCTCTTACTCTAAACTCCATCGGCCGTCTCTT CGTCCCGGTACAATCTTATTGTCTCCATGTCG GAATGTCCATTTGGAT  
CCCGAGATCTATGAAGACCCGACAACTTTCAATGGCTACCGCTTCTACGACTCCAGCCGCGAGGTCTGCTCTCCACGCGTG  
GCAACCACCTCGCTCACGTTCTTGACATTTTCTCATGGAGCGGGCAGCTGTCCCGCGCGGGTTCTCGCTACTCAAATTTGT  
CGGACGATCTTCATCAAGTTCCTGTGTCAGTACGACGTAGAACCTGTGCAGAAGGAGATACTACCCTATGGATTCACC AGG  
GGTCCGATGTATATGCC TAATCCATCAGTGATGAGAATCCGGCCAAGAAGTGACGGGAAG

MAVHV PFSI HHVVDIGI STGPVVIVLVLL FGLAVVGS DSLD GWWQKRALRGIPIVDEGSYMRPKLRWKRFD A EKEYARAYQ  
QYTKAGKPYAIRMQNDNYGIVLPLNSAKEWRSLPHDQLSFLQALAEFADNMNYCDVTDRT R IEAVHSCNNAESLNILNKLL  
ARETDALSQIFEQPTGKDWKELNTLQTI LSLCSTVTMALLLGPDTAPDPVLHHHSTSFGEAIMS SCYRRTGYPRILRPFV  
WRFSSECRNLRKHL SLVRERLVPEVARRVAAARAADKTKDVRPSSLLDALIAAAFNDNGSLS PDDQGRNDAAQVQLLAD ELI  
FYHFMLCKPTAYNIIFQLYAIMDHPEYKAPLREALQALKLTNGDWTVE TLKHAPKLESFTKETFRLYDIS W FVSVFRVMK  
PLTLNSIGLSLRPGTIL LSPCRNVHLDPEIYEDPTTFNGYRFYDS SREVCSPRVATT SLTFLTF SHGAGSCP ARVLA TQIC  
RTIFIKFLLQYDVEPVQKEILPYGFT R GPMYMPNPSVMMRI RPRS DGK

### LxC5 (P142R, D322E, E329M, C331R, F336Y, G396W, R401Q, S513R, V516M)

ATGGCAGTTCATGTACCATT CAGCATCCACCACGTCGTGGATATCGGCATTTCCACC GGCCCGGTAGTCATTGTCCTCGTT  
CTCCTATTCGGGTGGCTGTCTGGGATCCGACAGCCTTGATGGATGGTGGCAGAAAAGAGCCTTGAGAGGCATTCCGATT  
GTAGACGAGGGTAGCTACATGCGGCCAAAGCTACGATGGAA GCGCTTCGATGCGGAGAAAGAGTATGCGAGAGCATA TCAG  
CAGTACACAAAAGCAGGGAAA CCTTATGC GATCGGATGCA GAATGATAATTA TGGCATTGTGCT TCCTTAAACTCAGCA  
AAGGAATGGAGGTCTCTACCA CACGACCAGCTGAGCTTTCTTCAAGCCTTGGCAGAGTTTGCGGATATGAACATGTACTGC  
GACGT CACGGACAGGACA CGCATTGAAGCTGTT CATAGTTGCAACAACGCTGAATCA TTAACATCCTCAATAAGCTTCTC  
GCCCCGGAAACCGATACAGCCTTATCTCAGATT TTCGAGCAGCCTACAGGAAAAGACTGGAAGGAATTGAACACACTGCAG  
ACAATCCTCTCCTTATGCTCAACGGTTACTATGGCCTTGCTCCTCGGACCAGATACAGCCCCTGACCCGGTGTCTCCACCAC  
CATTGACGTCTTTTGCGGAAGCAATTATGAGCAGTTGTTATCGACGAACGGGATATCCGCGCATCCTGCGGCATTCTGTG  
TGGCGCTTTTCGTCCGAATGCGAAATCTGAGGAAACACTTATCTCTCGTGAGAGAGAGACTTGTTCCTGAGGTTGCGCGC  
CGTGTGCGAGCTGCACGAGCGGCGGATAAAACCAAGGACGTACGCCCATCTTCATTGTTGGACGCACTGATCGCGCGGCC  
TTCGACAACGGCAGCTTAAGCCAGATGACCAAGGCAGAAATGATGCAGCACAGGTACAGTTGCTGGCAGAT GAGCTCATT  
TTCTACCATTTCA TGGCTCCGTAAACCGACCGCA TACAACATCATCTTCCAGCTGTATGCCATCATGGACCACCCAGAGTAC  
AAGGCTCCTCTCCGAGAGGAGGCAC TCCAAGCCTTGAAGCTCACCAATGGTGA CTGGACCGTTGAAACTCTGAAGCAGCT  
CCCAAGTTAGAAA GCTT TACAAAGGAGACCTTT CGACTGTACGATATCTCC TGGTTTGT CAGCTTTCAGCGTGTGTCATGAAA  
CCTCTTACTCTAAACTCCATCGGCCGTCTCTT CGTCCCGGTACAATCTTATTGTCTCCATGTCGGAATGTCCATTTGGAT  
CCCGAGATCTATGAAGACCCGACAACTTTCAATGGCTACCGCTTCTACGACTCCAGCCGCGAGGTCTGCTCTCCACGCGTG  
GCAACCACCTCGCTCACGTTCTTGACATTTTCTCATGGAGCGGGCAGCTGTCCCGCGCGGGTTCTCGCTACTCAAATTTGT  
CGGACGATCTTCATCAAGTTCCTGTGTCAGTACGACGTAGAACCTGTGCAGAAGGAGATACTACCCTATGGATTCACC AGG  
GGTCCGATGTATATGCC TAATCCATCAGTGATGAGAATCCGGCCAAGAAGTGACGGGAAG

MAVHV PFSI HHVVDIGI STGPVVIVLVLL FGLAVVGS DSLD GWWQKRALRGIPIVDEGSYMRPKLRWKRFD A EKEYARAYQ  
QYTKAGKPYAIRMQNDNYGIVLPLNSAKEWRSLPHDQLSFLQALAEFADNMNYCDVTDRT R IEAVHSCNNAESLNILNKLL  
ARETDALSQIFEQPTGKDWKELNTLQTI LSLCSTVTMALLLGPDTAPDPVLHHHSTSFGEAIMS SCYRRTGYPRILRPFV  
WRFSSECRNLRKHL SLVRERLVPEVARRVAAARAADKTKDVRPSSLLDALIAAAFNDNGSLS PDDQGRNDAAQVQLLAD ELI  
FYHFMLRKPTAYNIIFQLYAIMDHPEYKAPLREALQALKLTNGDWTVE TLKHAPKLESFTKETFRLYDIS W FVSVFRVMK  
PLTLNSIGLSLRPGTIL LSPCRNVHLDPEIYEDPTTFNGYRFYDS SREVCSPRVATT SLTFLTF SHGAGSCP ARVLA TQIC  
RTIFIKFLLQYDVEPVQKEILPYGFT R GPMYMPNPSVMMRI RPRS DGK

### LxC6 (P142R, D322E, E329M, C331R, F336Y, G396W, Q401R<sub>reversion</sub>, T468S, S513R, V516M)

ATGGCAGTTCATGTACCATT CAGCATCCACCACGTCGTGGATATCGGCATTTCCACC GGCCCGGTAGTCATTGTCCTCGTT  
CTCCTATTCGGGTGGCTGTCTGGGATCCGACAGCCTTGATGGATGGTGGCAGAAAAGAGCCTTGAGAGGCATTCCGATT  
GTAGACGAGGGTAGCTACATGCGGCCAAAGCTACGATGGAA GCGCTTCGATGCGGAGAAAGAGTATGCGAGAGCATA TCAG  
CAGTACACAAAAGCAGGGAAA CCTTATGC GATCGGATGCA GAATGATAATTA TGGCATTGTGCT TCCTTAAACTCAGCA  
AAGGAATGGAGGTCTCTACCA CACGACCAGCTGAGCTTTCTTCAAGCCTTGGCAGAGTTTGCGGATATGAACATGTACTGC  
GACGT CACGGACAGGACA CGCATTGAAGCTGTT CATAGTTGCAACAACGCTGAATCA TTAACATCCTCAATAAGCTTCTC  
GCCCCGGAAACCGATACAGCCTTATCTCAGATT TTCGAGCAGCCTACAGGAAAAGACTGGAAGGAATTGAACACACTGCAG  
ACAATCCTCTCCTTATGCTCAACGGTTACTATGGCCTTGCTCCTCGGACCAGATACAGCCCCTGACCCGGTGTCTCCACCAC

CATTGACGTCTTTTGGCGAAGCAA TTATGAGCAGTTGTTATCGACGAACGGGATATCCGCGCATCCTGCGGCCATTCTGTG  
TGGCGCTTTTCGTCCGAATGCCGAAATCTGAGGAAACACTTATCTCTCGTGAGAGAGAGACTTGTTCCTGAGGTTGCGCGC  
CGTGTGCGAGCTGCACGAGCGGCGGATAAAACCAAGGACGTACGCCCATCTTCATTGTTGGACGCACTGATCGCGCGGCC  
TTCGACAACGGCAGCTTAAGCCAGATGACCAAGGCAGAAATGATGCAGCACAGGTACAGTTGCTGGCAGATGAGCTCATT  
TTCTACCATTTTCATGCTCCGTAAACCGACCGCA TACAACATCATCTTCCAGCTGTATGCCATCATGGACCACCCAGAGTAC  
AAGGCTCCTCTCCGAGAGGAGGCAC TCCAAGCCTTGAAGCTCACCAATGGTGA CTGGACCGTTGAAACTCTGAAGCAGCT  
CCCAAGTTAGAAA GCTTTACAAAGGAGACCTTTGACTGTACGATATCTCTGGTTTGTGAGCTTTGGCGTGTGATGAAA  
CCTCTTACTCTAAACTCCATCGGCCGTCTCTTCTGTC CCGGTACAATCTTATTGTCTCCATGTGCG GAATGTCCATTTGGAT  
CCCGAGATCTATGAAGACCCGACAACTTTCAATGGCTACCGCTTCTACGACTCCAGCCGCGAGGTCTGCTCTCCACGCGTG  
GCAACCACCTCGCTCACGTTCTTGTCATTTTCTCATGGAGCGGGCAGCTGTCCCGCGCGGGTTCTCGCTACTCAAATTTGT  
CGGACGATCTTCATCAAGTTCCTGTGTCAGTACGACGTAGAACCTGTGCAGAAAGGAGATACTACCCTATGGATTACCCAGG  
GGTCCGATGTATATGCC TAATCCATCAGTGATGATGAGAATCCGGCCAAGAAGTGACGGGAAG

MAVHV PFSIHHVVDIGI STGPPVIVLVLLFGLAVVGS DSLDGWWQKRALRGIPIVDEGSYMRPKLRWKRFD A EKEYARAYQ  
QYTKAGKPYAIRMQNDNYGIVLPLNSAKEWRSLPHDQLSFLQALAEFADMMNYCDVTDRTRIEAVHSCNNAESLNILNKLL  
ARETDALSQIFEQPTGKDWKELNTLQTI LSLCSTVTMALLLGPDTAPDPVLHHHSTSFGEAIMS SCYRRTGYPRILRPFV  
WRFSSSECRNLRKHL SLVRERLVPEVARRVAAARAADKTKDVRPSSLLDALIAAAFNDNGSLS PDDQGRNDAAQVQLLAD ELI  
FYHFMLRKPTAYNIIFQLYAIMDHPEYKAPLREALQALKLTNGDWTVE TLKHAPKLESFTKETFRLYDISWVVSFRVMK  
PLTLNSIGLSLRPGTILLSPCRNVHLDPEIYEDPTTFNGYRFYDS SREVCSPRVATTSLTFLSFSHGAGSCPARVLATQIC  
RTIFIKFLLQYDVEPVQKEILPYGFTRGPMYMPNPSVMMRI RPRS DGK

**Lx C7 (F128V, P142R, D322E, E329M, C331R, F336Y, G396W, Q401R<sub>reversion</sub>, T468S, S513R, V516M)**

ATGGCAGTTCATGTACCATTACGATCCACCACGTCGTGGATATCGGCATTTCCACC GGCCCGGTAGTCATTGTCCTCGTT  
CTCCTATTCGGGTGGCTGTCGTGGGATCCGACAGCCTTGATGGATGGTGGCAGAAAAGAGCCTTGAGAGGCATTCCGATT  
GTAGACGAGGGTAGCTACATGCGCCAAAGCTACGATGGAAGCGCTTCGATGCGGAGAAAGAGTATGCGAGAGCATA TCAG  
CAGTACACAAAAGCAGGGAAA CCTTATGC GATCGGATGCA GAATGATAATTA TGGCATTGTGCT TCCC TTA AACTCAGCA  
AAGGAATGGAGGTCTTACCACACGACCAGCTGAGCTTTCTTCAAGCCTTGGCAGAG GTGGCGGATATGAACATGTACTGC  
GACGTACGGACAGGACA CGCATTGAAGCTGTT CATAGTTGCAACAACGCTGAATCA TTAACATCCTCAATAAGCTTCTC  
GCCCCGGAACCGATACAGCCTTATCTCAGATT TTCGAGCAGCCTACAGGAAAAGACTGGAAGGAATTGAACACACTGCAG  
ACAATCCTCTCCTTATGCTCAACGGTTACTATGGCCTTGCTCCTCGGACCAGATACAGCCCCTGACCCGGTGTCTCCACCAC  
CATTGACGTCTTTTGGCGAAGCAA TTATGAGCAGTTGTTATCGACGAACGGGATATCCGCGCATCCTGCGGCCATTCTGTG  
TGGCGCTTTTCGTCCGAATGCCGAAATCTGAGGAAACACTTATCTCTCGTGAGAGAGAGACTTGTTCCTGAGGTTGCGCGC  
CGTGTGCGAGCTGCACGAGCGGCGGATAAAACCAAGGACGTACGCCCATCTTCATTGTTGGACGCACTGATCGCGCGGCC  
TTCGACAACGGCAGCTTAAGCCAGATGACCAAGGCAGAAATGATGCAGCACAGGTACAGTTGCTGGCAGATGAGCTCATT  
TTCTACCATTTTCATGCTCCGTAAACCGACCGCA TACAACATCATCTTCCAGCTGTATGCCATCATGGACCACCCAGAGTAC  
AAGGCTCCTCTCCGAGAGGAGGCAC TCCAAGCCTTGAAGCTCACCAATGGTGA CTGGACCGTTGAAACTCTGAAGCAGCT  
CCCAAGTTAGAAA GCTTTACAAAGGAGACCTTTGACTGTACGATATCTCTGGTTTGTGAGCTTTGGCGTGTGATGAAA  
CCTCTTACTCTAAACTCCATCGGCCGTCTCTTCTGTC CCGGTACAATCTTATTGTCTCCATGTGCGGAATGTCCATTTGGAT  
CCCGAGATCTATGAAGACCCGACAACTTTCAATGGCTACCGCTTCTACGACTCCAGCCGCGAGGTCTGCTCTCCACGCGTG  
GCAACCACCTCGCTCACGTTCTTGTCATTTTCTCATGGAGCGGGCAGCTGTCCCGCGCGGGTTCTCGCTACTCAAATTTGT  
CGGACGATCTTCATCAAGTTCCTGTGTCAGTACGACGTAGAACCTGTGCAGAAAGGAGATACTACCCTATGGATTACCCAGG  
GGTCCGATGTATATGCC TAATCCATCAGTGATGATGAGAATCCGGCCAAGAAGTGACGGGAAG

MAVHV PFSIHHVVDIGI STGPPVIVLVLLFGLAVVGS DSLDGWWQKRALRGIPIVDEGSYMRPKLRWKRFD A EKEYARAYQ  
QYTKAGKPYAIRMQNDNYGIVLPLNSAKEWRSLPHDQLSFLQALAEVADMMNYCDVTDRTRIEAVHSCNNAESLNILNKLL  
ARETDALSQIFEQPTGKDWKELNTLQTI LSLCSTVTMALLLGPDTAPDPVLHHHSTSFGEAIMS SCYRRTGYPRILRPFV  
WRFSSSECRNLRKHL SLVRERLVPEVARRVAAARAADKTKDVRPSSLLDALIAAAFNDNGSLS PDDQGRNDAAQVQLLAD ELI  
FYHFMLRKPTAYNIIFQLYAIMDHPEYKAPLREALQALKLTNGDWTVE TLKHAPKLESFTKETFRLYDISWVVSFRVMK  
PLTLNSIGLSLRPGTILLSPCRNVHLDPEIYEDPTTFNGYRFYDS SREVCSPRVATTSLTFLSFSHGAGSCPARVLATQIC  
RTIFIKFLLQYDVEPVQKEILPYGFTRGPMYMPNPSVMMRI RPRS DGK

## Supplementary data from engineering campaign

**Supplemental Figure S66.** Starting point for engineering campaign. Wild-type KtnC catalyzed the cross-coupling of coumarin **10** and naphthol **31** to form **32** with a 0.5% conversion in a complex mixture of competing cross-coupled and dimer byproducts (**33–36**).

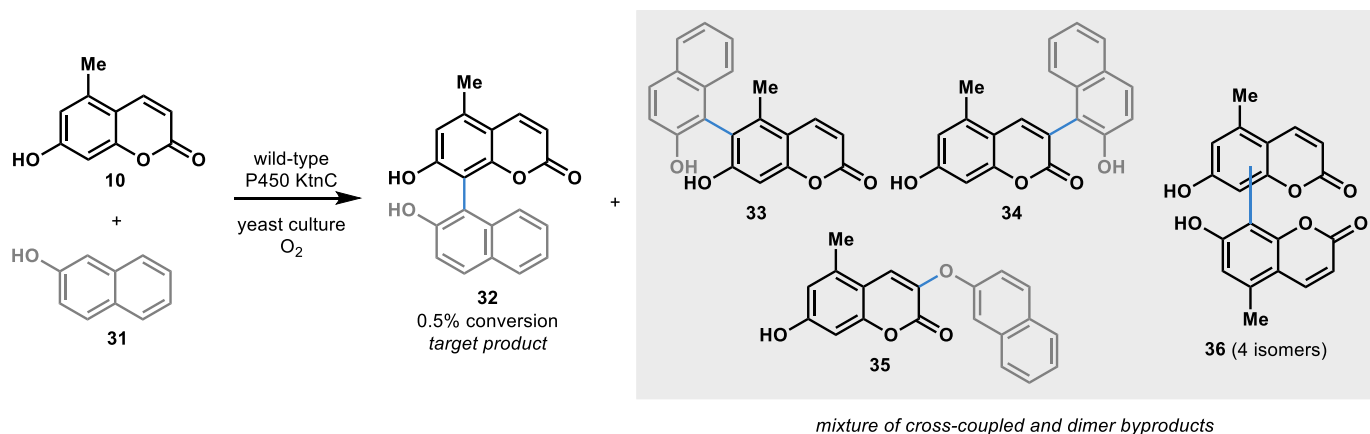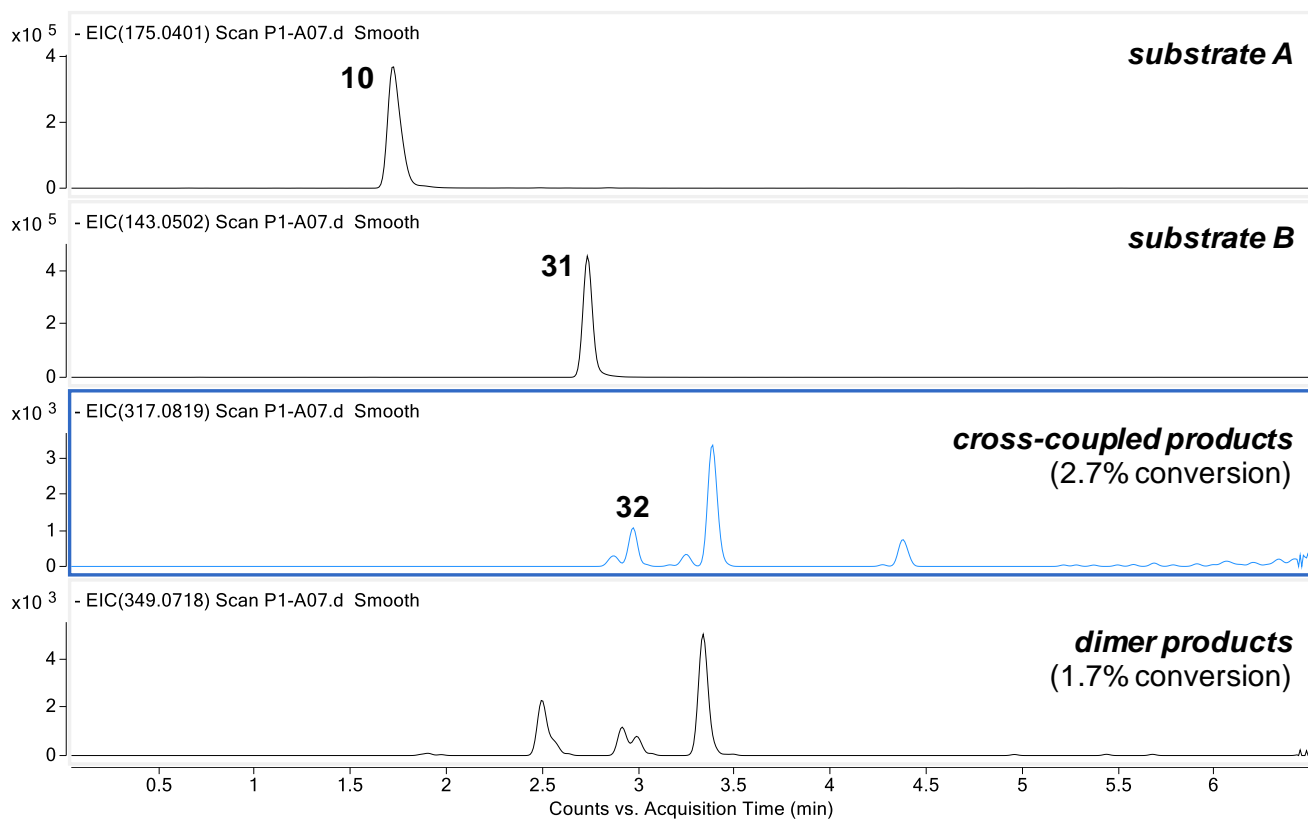

**Supplemental Figure S67.** Library datasets from each round of evolution. **(a)** Tier 1 RapidFire-MS data represented in waterfall plots showing the fold improvement in cross-coupling for all active variants generated in rounds 1-4 of evolution. The fold improvement for each of the variants was calculated by setting the average conversion to cross-coupled product in the control (template) reactions to 1.0. **(b)** Tier 2 LC-MS data showing the site-selectivity profile of the top variants from rounds 3-5 of evolution.

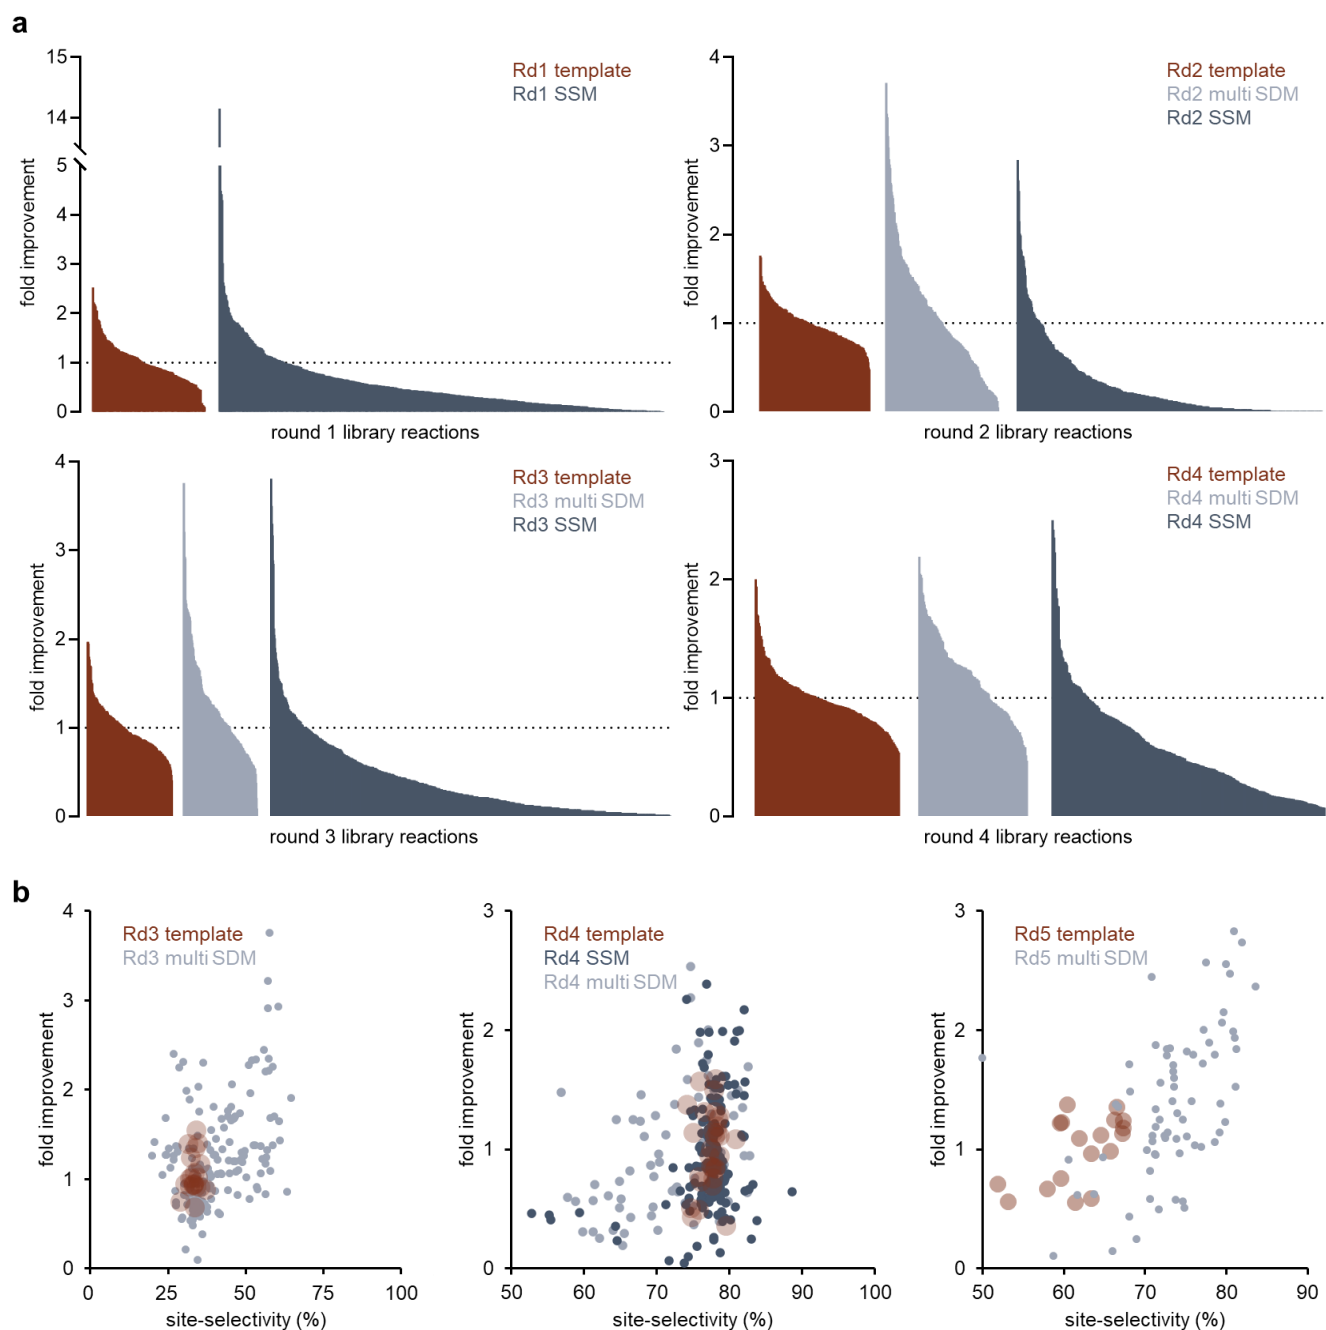



**Supplemental Figure S68.** Reactivity of P450 variants over evolution progress. Extracted ion chromatograms include coumarin substrate **10** (175.0401 m/z), cross-coupled products **32–36** (317.0819), and coumarin dimers **45** (349.0718).

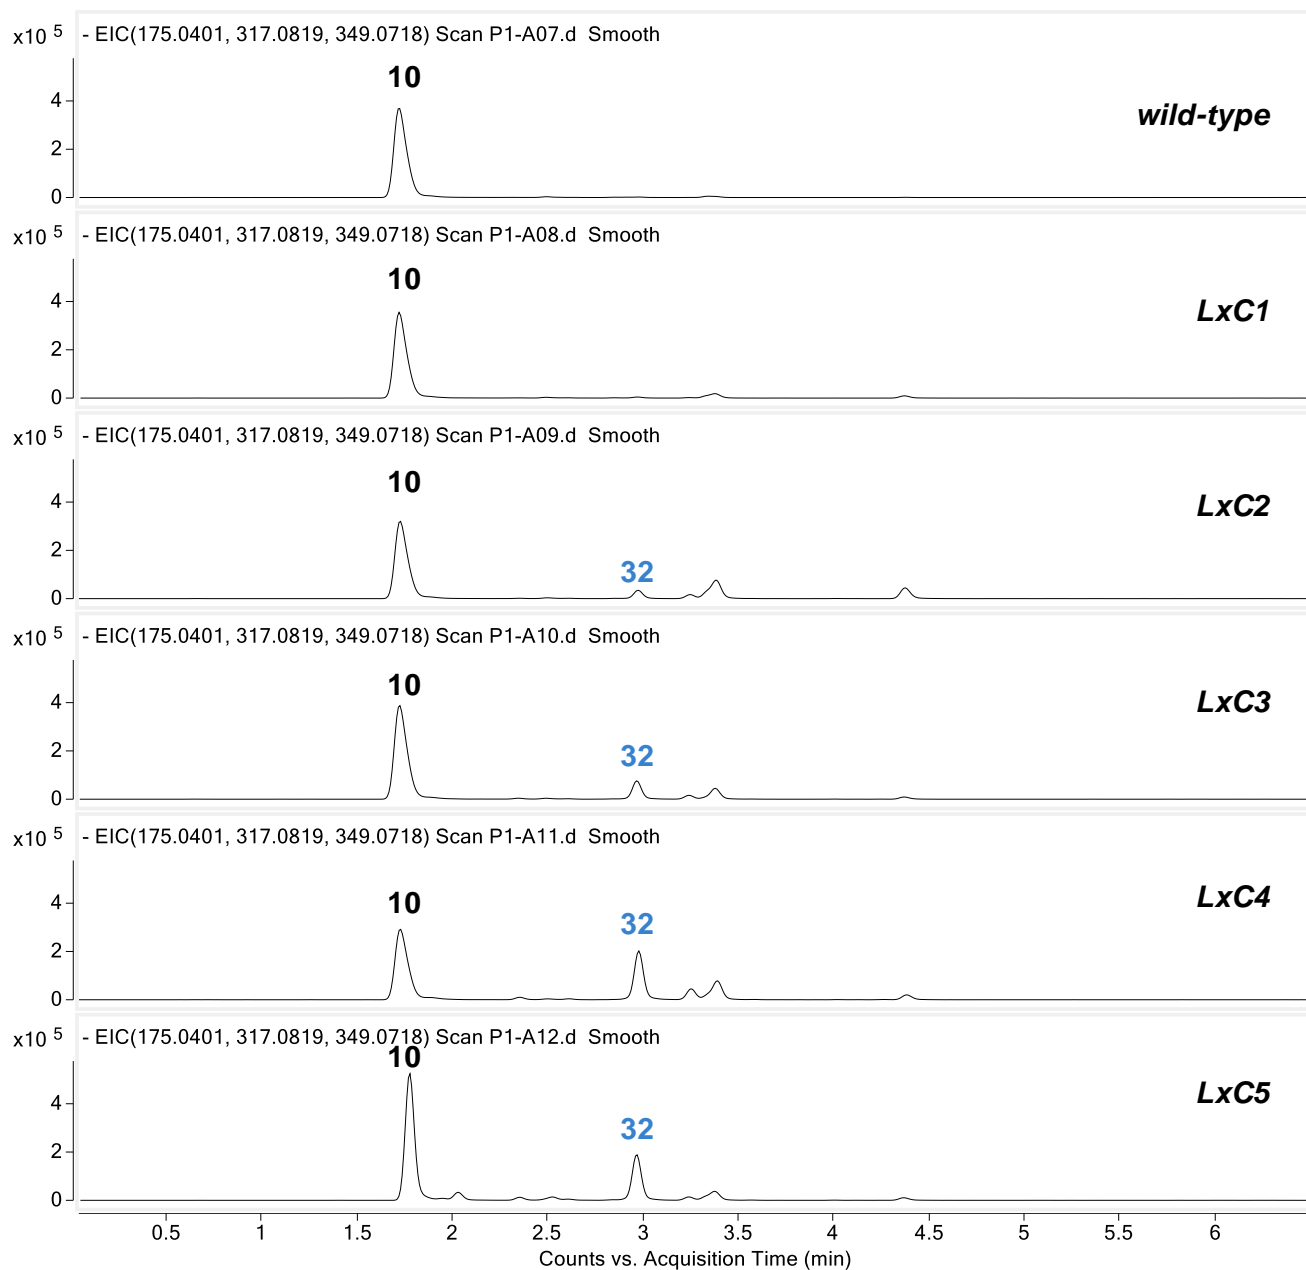

**Supplemental Figure S69.** Chemoselectivity of P450 variants over evolution progress. Extracted ion chromatograms include cross-coupled products **32–35** (317.0819) and coumarin dimers **36** (349.0718). The major coumarin dimer (of four total isomers) is highlighted in each chromatogram.

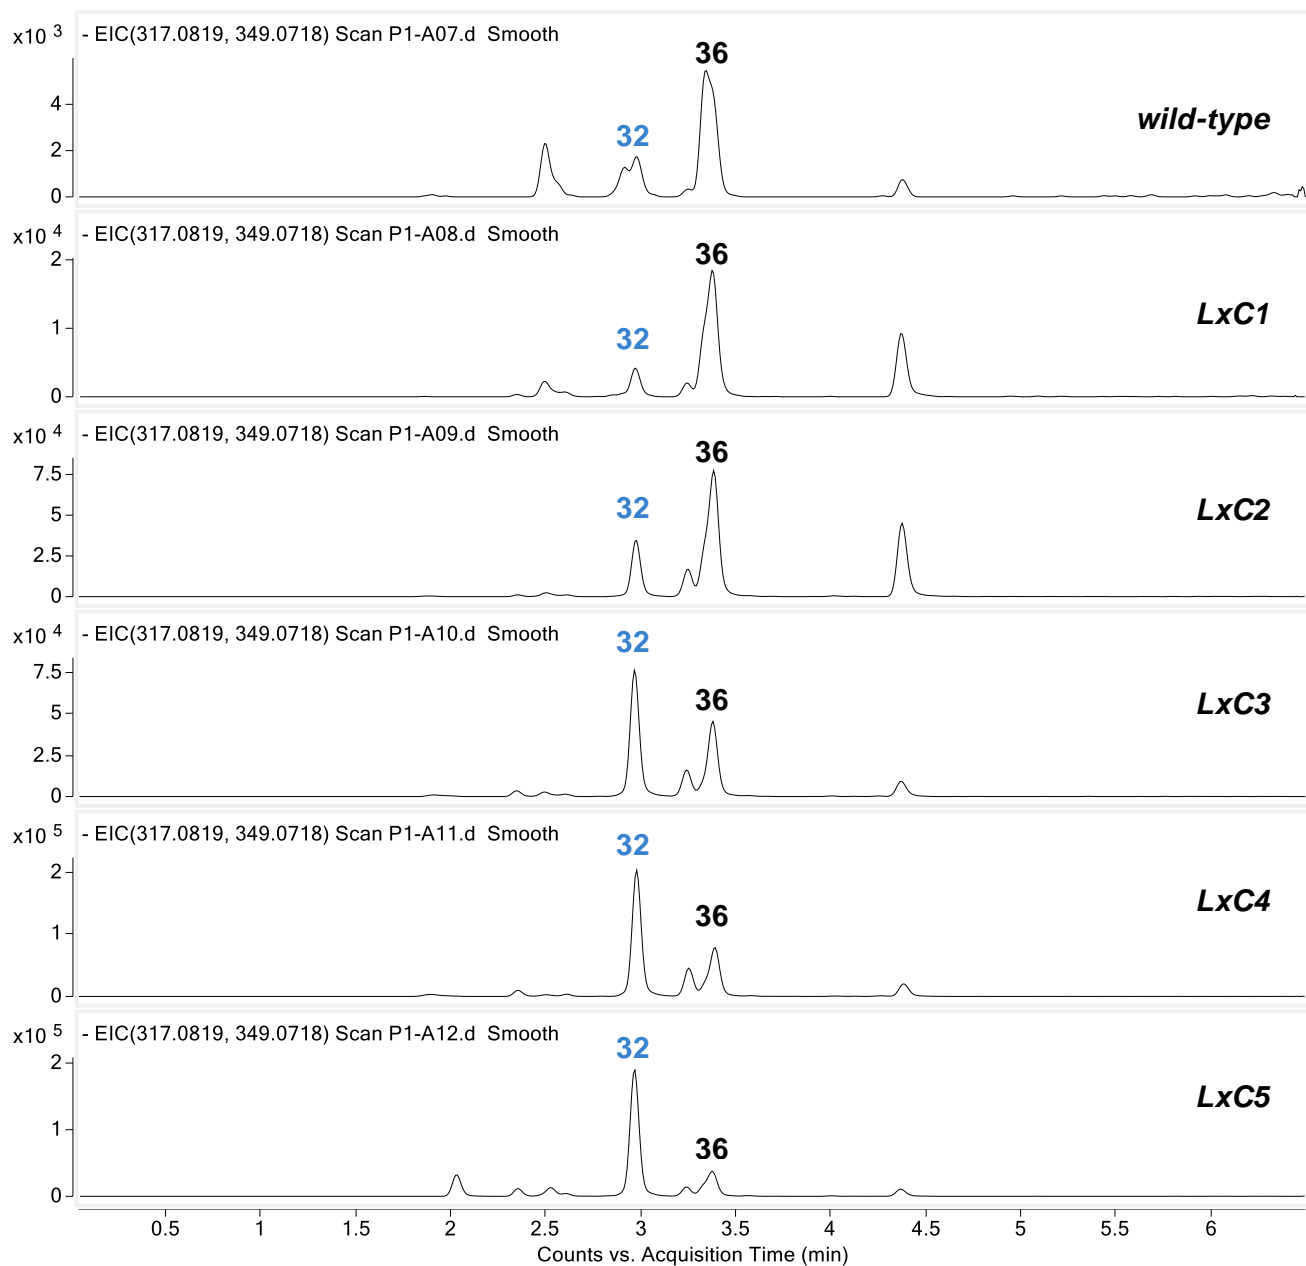

**Supplemental Figure S70.** Site-selectivity of P450 variants over evolution progress. Extracted ion chromatograms include cross-coupled products **32–35** (317.0819).

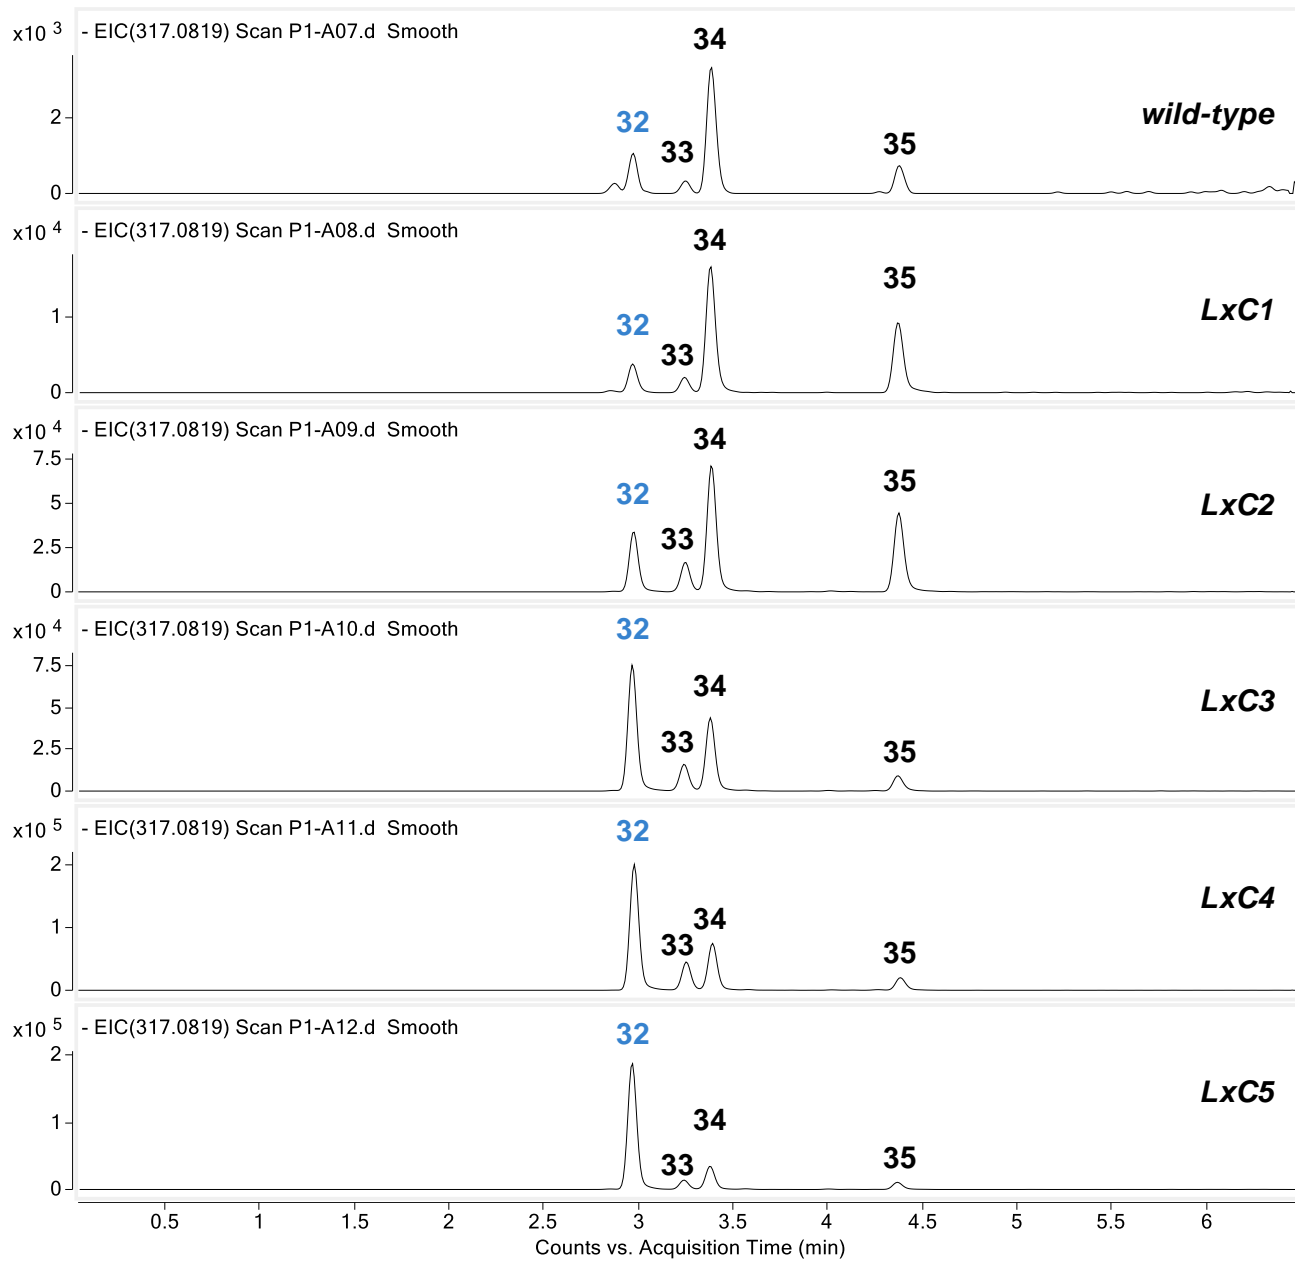

**Supplemental Figure S71.** Effect of mutations incorporated throughout evolution campaign on atroposelectivity in the target cross-coupling to form **32**.

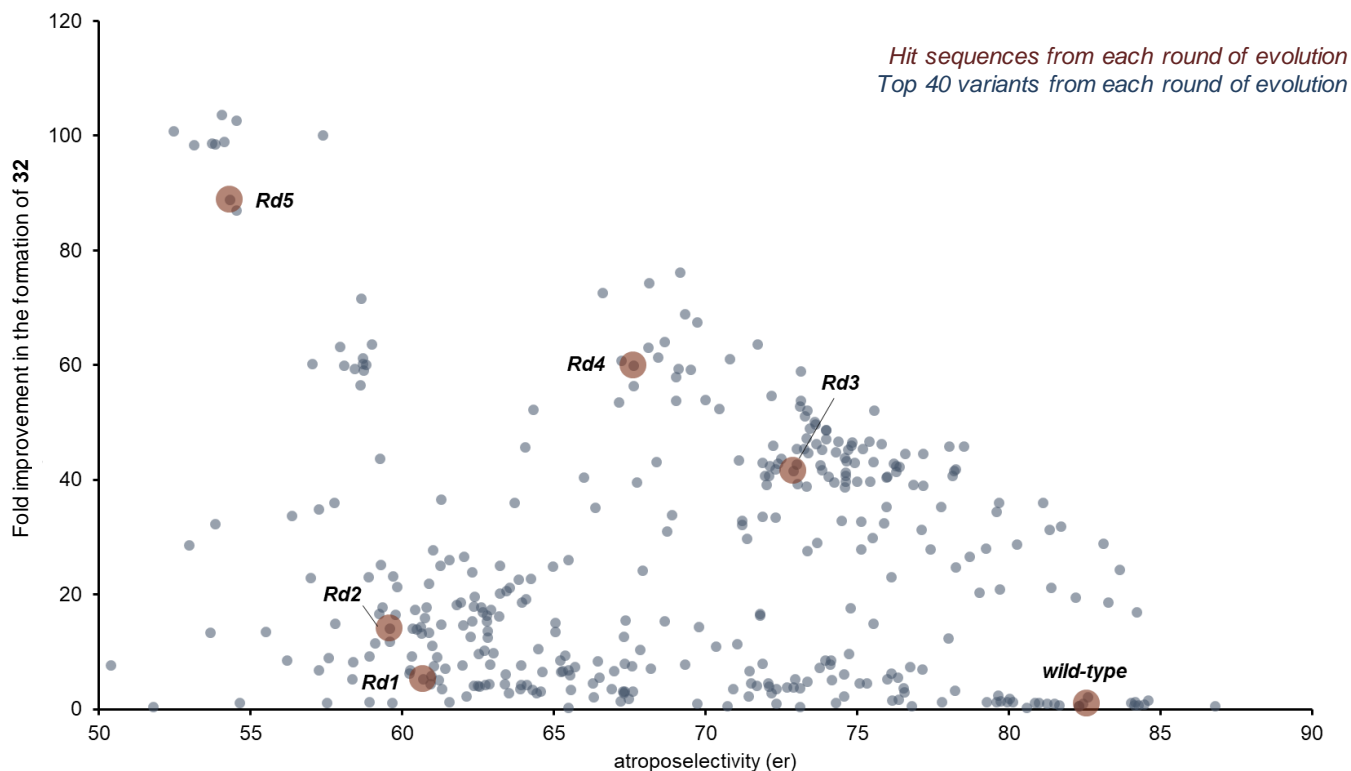

**Supplemental Figure S72.** Chiral LC-MS data generated in final rounds of evolution to optimize for atroposelectivity of cross-coupling reaction. (a) Round 6 of evolution. (b) Round 7 of evolution.

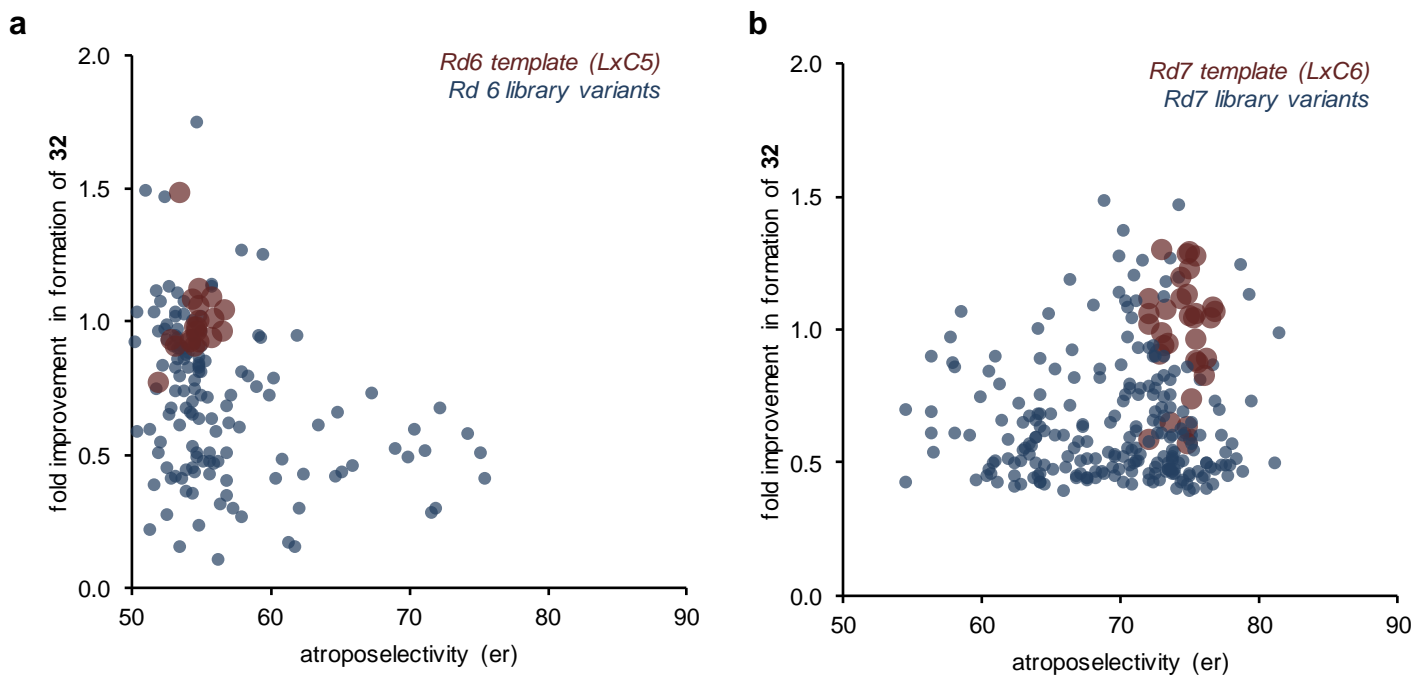

## V. Biocatalytic reactions with bacterial P450-RhFRed enzymes

### Methods for biocatalytic cross-couplings

**General considerations.** Substrate stock solutions were prepared to 50 mM in dimethyl sulfoxide (DMSO). Enzyme aliquots were stored in buffer containing 50 mM tricine pH 8, 150 mM NaCl, 10% glycerol, 0.5 mM EDTA at  $-80\text{ }^{\circ}\text{C}$  and discarded after 1 freeze/thaw cycle. Stock solutions of glucose-6-phosphate were prepared as 500 mM stocks in MilliQ water and stored at  $-80\text{ }^{\circ}\text{C}$ . Stock solutions of NADP<sup>+</sup> were prepared as 100 mM stocks in MilliQ water and stored at  $-80\text{ }^{\circ}\text{C}$ . Stock solutions of glucose-6-phosphate dehydrogenase were prepared as 100 U/mL stocks and stored at  $-80\text{ }^{\circ}\text{C}$ .

**Lysate reactions with panel SSN enzymes.** 96-well plates containing harvested cells were thawed at room temperature and resuspended in 300  $\mu\text{L}$  of plate lysis buffer (50 mM tricine pH 8, 150 mM NaCl, 10% glycerol, 0.5 mM EDTA, 2 mg/mL lysozyme, 100  $\mu\text{M}$  PMSF). The cells were enzymatically lysed by incubation at  $25\text{ }^{\circ}\text{C}$ , 350 rpm for 2 h. The lysed plates were then centrifuged at  $1,000\times g$  for 30 min at  $4\text{ }^{\circ}\text{C}$ . The clarified lysate (50  $\mu\text{L}$ ) was transferred to a new plate with each well containing 50  $\mu\text{L}$  reaction mix (5 mM glucose-6-phosphate, 1 mM NADP<sup>+</sup>, 1 U/mL glucose-6-phosphate dehydrogenase, 1 mM substrate A, and 1 mM substrate B in 50 mM tricine pH 8.3). Reactions were incubated at  $30\text{ }^{\circ}\text{C}$  for  $\sim 18$  h and then quenched with 400  $\mu\text{L}$  methanol containing 1  $\mu\text{M}$  2,6-dihydroxyacetophenone (internal standard).

**In vitro reactions with purified enzyme.** 50  $\mu\text{L}$  reactions containing 10  $\mu\text{M}$  P450-RhFRed, 5 mM glucose-6-phosphate, 1 mM NADP<sup>+</sup>, 1 U/mL glucose-6-phosphate dehydrogenase, 100  $\mu\text{M}$  substrate A, and 300  $\mu\text{M}$  substrate B in 50 mM tricine pH 8.3 were prepared. Reactions were incubated at  $30\text{ }^{\circ}\text{C}$  for  $\sim 18$  h and then quenched with 150  $\mu\text{L}$  methanol containing 1  $\mu\text{M}$  2,6-dihydroxyacetophenone (internal standard). All reactions were performed in duplicate.

**LC-MS analysis.** Quenched reactions were filtered through Pall AcroPrep Advance 350  $\mu\text{L}$  0.2  $\mu\text{m}$  GHP Short Tip Natural PP 96-well filter plates by centrifugation ( $1,000\times g$  for 5 minutes). The samples were subjected to liquid chromatography PDA spectrometry (UPLC) analysis performed on an Agilent 6230 time of flight mass spectrometer with a Dual AJS ESI source and an Agilent 1290 Infinity Series II diode array detector, autosampler, and binary pump. The reaction products were separated and analyzed on a Waters Acquity Premier HSS T3 1.8  $\mu\text{m}$  C18, 2.1  $\times$  50 mm column under the following conditions:

Negative mode; phase A = 95:5 deionized water:acetonitrile B = 95:5 acetonitrile:deionized water; method = 10% B held for 0.5 min, to 40% B over 2.0 min, to 55% B over 1.75 min, to 75% B over 0.75 min, to 100% B over 0.5 min, hold at 100% B for 1 min; 0.7 mL/min flow rate. Each injection was followed by equilibration at 10% B for 0.5 min.

## Standard curves and quantification of biocatalytic reactions

Standard curves were generated using MassHunter software to process the raw data files and extract ion chromatograms for the target molecule. The peak integration of the target molecule was normalized by the internal standard. The percent yield of the cross-coupled products was calculated using standard curves of authentic cross-coupled product standards.

**Supplemental Table S6.** Quantification of percent yields using product standard curves.

| product   | substrate A (100 $\mu\text{M}$ ) | substrate B (300 $\mu\text{M}$ ) | hit enzyme | product/IS | [product]          | % yield | average % yield  |
|-----------|----------------------------------|----------------------------------|------------|------------|--------------------|---------|------------------|
| <b>32</b> | coumarin                         | 2-naphthol                       | CYP158A2   | 0.61       | 6.6 $\mu\text{M}$  | 6.6%    | 7.3 $\pm$ 0.9 %  |
|           |                                  |                                  |            | 0.71       | 7.9 $\mu\text{M}$  | 7.9%    |                  |
| <b>43</b> | 5-Br-2-naphthol                  | 2-naphthol                       | CYP158A2   | 0.85       | 12.6 $\mu\text{M}$ | 12.6%   | 12.8 $\pm$ 0.2 % |
|           |                                  |                                  |            | 0.87       | 12.9 $\mu\text{M}$ | 12.9%   |                  |
| <b>44</b> | 3-Br-2-naphthol                  | 2-naphthol                       | CYP158A2   | 0.35       | 3.1 $\mu\text{M}$  | 3.1%    | 3.0 $\pm$ 0.1 %  |
|           |                                  |                                  |            | 0.34       | 2.9 $\mu\text{M}$  | 2.9%    |                  |
| <b>45</b> | indole                           | 2-naphthol                       | A0A1J4PSC8 | 0.23       | 18.1 $\mu\text{M}$ | 18.1%   | 18.2 $\pm$ 0.1 % |
|           |                                  |                                  |            | 0.22       | 18.3 $\mu\text{M}$ | 18.3%   |                  |
| <b>46</b> | carbazole                        | 3-bromo-2-naphthol               | A0A6B3DVM9 | 4.92       | 61.2 $\mu\text{M}$ | 61.2%   | 55.9 $\pm$ 7.6 % |
|           |                                  |                                  |            | 4.03       | 50.5 $\mu\text{M}$ | 50.5%   |                  |

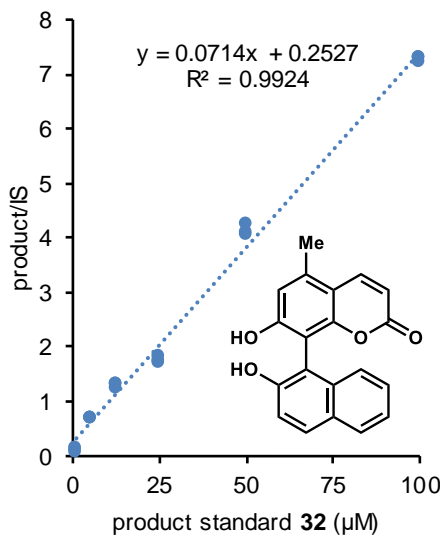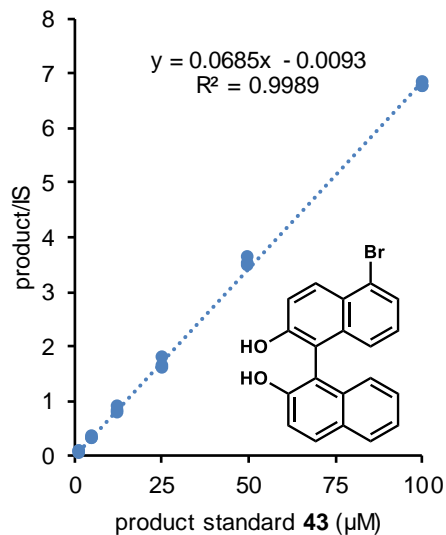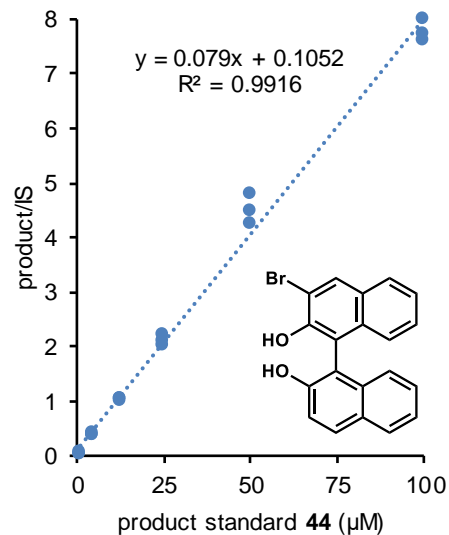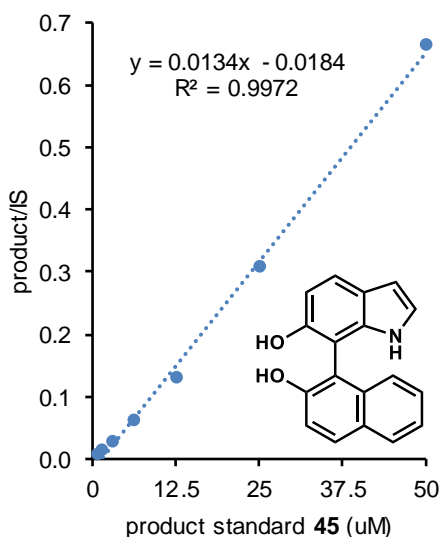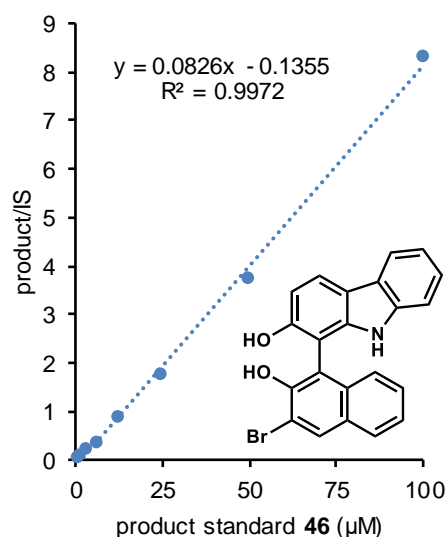

## LC-MS traces for biocatalytic reactions

**Supplemental Figure S73.** Oxidative cross-coupling catalyzed by CYP158A2-RhFRed for the formation of **32**. Reactions were performed with 100  $\mu$ M A and 300  $\mu$ M B (**Figure 4**).

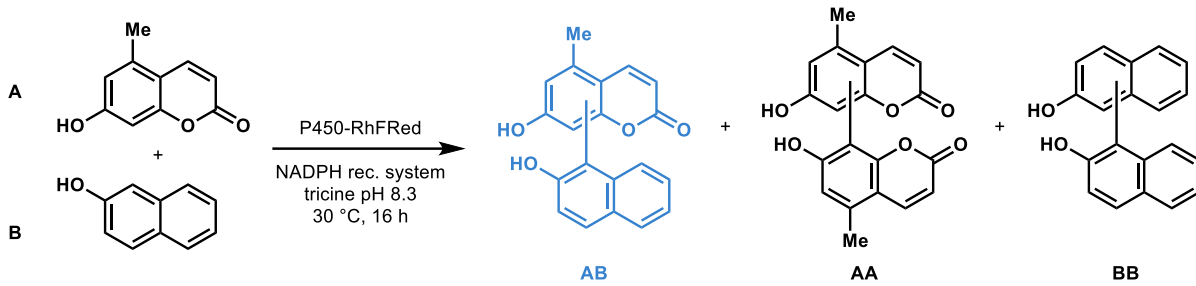

### No enzyme control:

### CYP158A2-RhFRed:

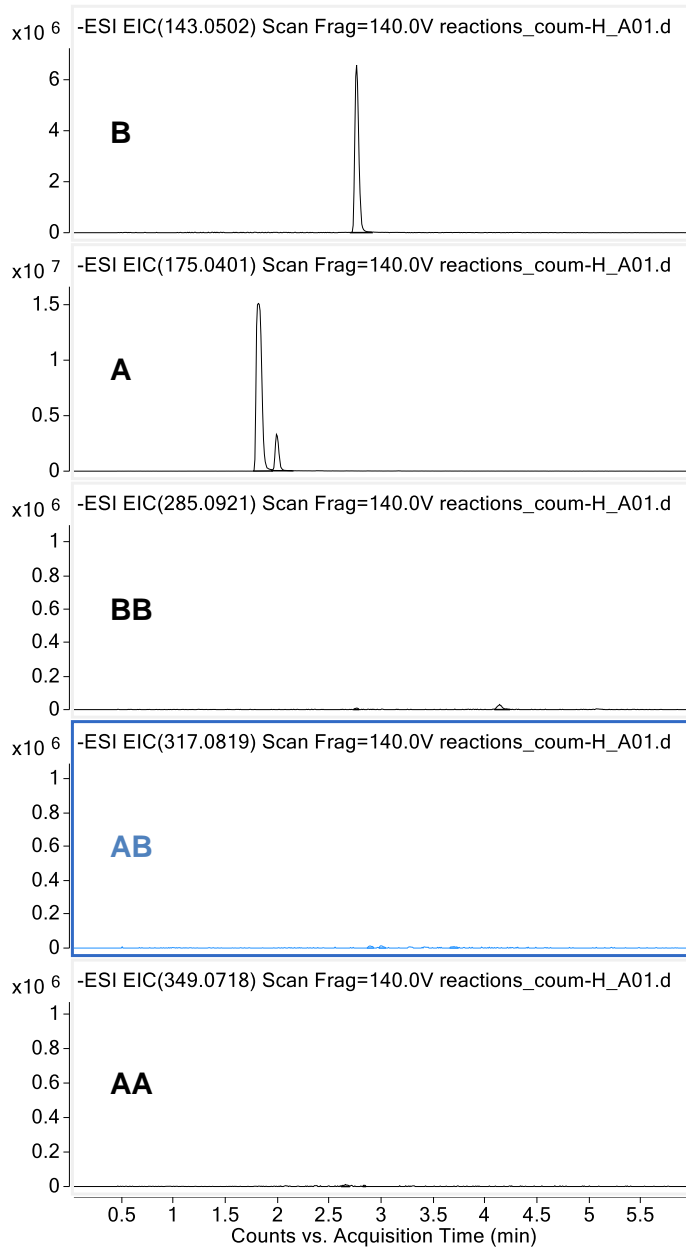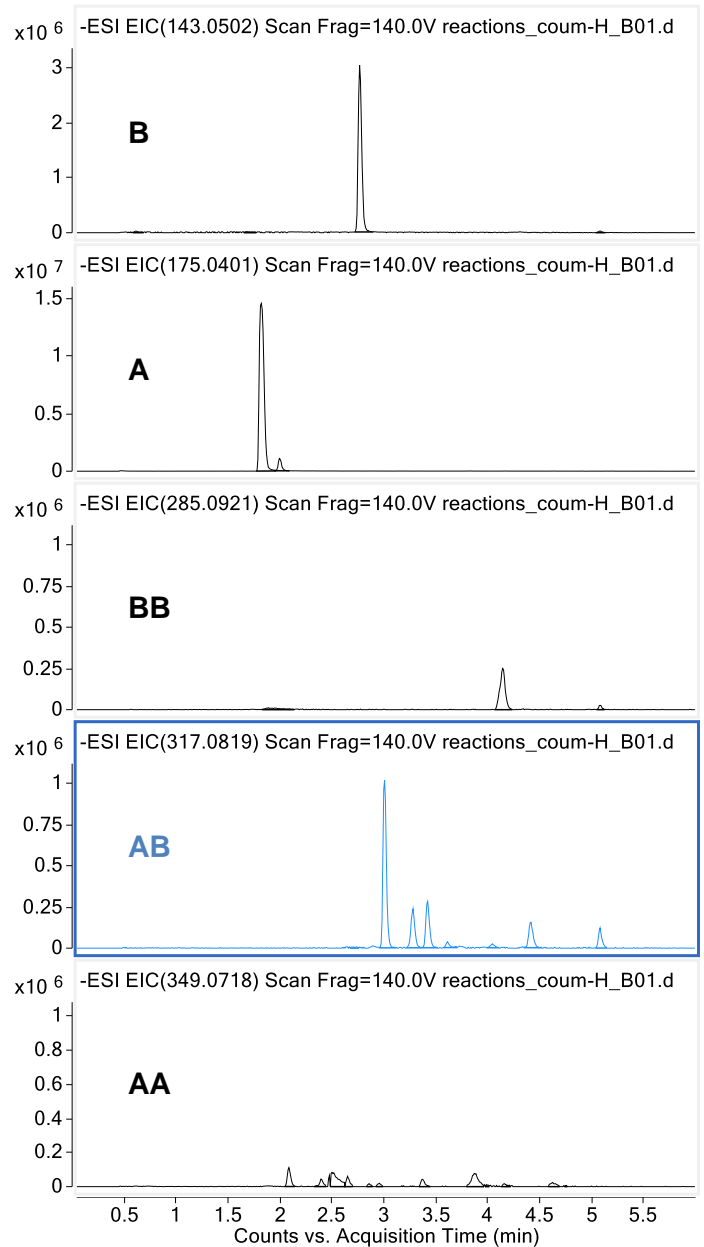

**Supplemental Figure S74.** Oxidative cross-coupling catalyzed by CYP158A2-RhFRed for the formation of **43**. Reactions were performed with 100  $\mu$ M A and 300  $\mu$ M B (**Figure 4**).

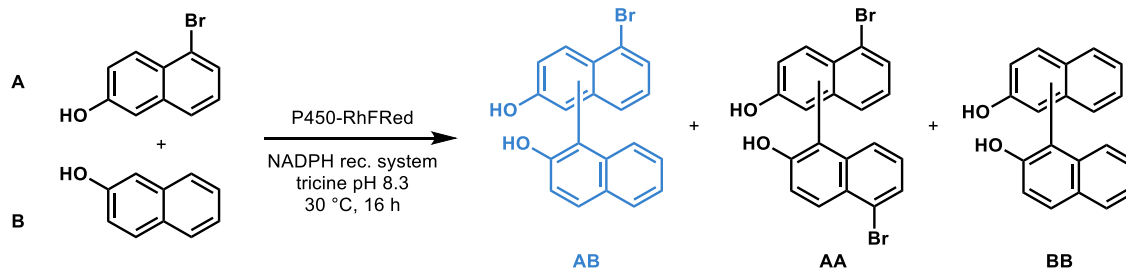

**No enzyme control:**

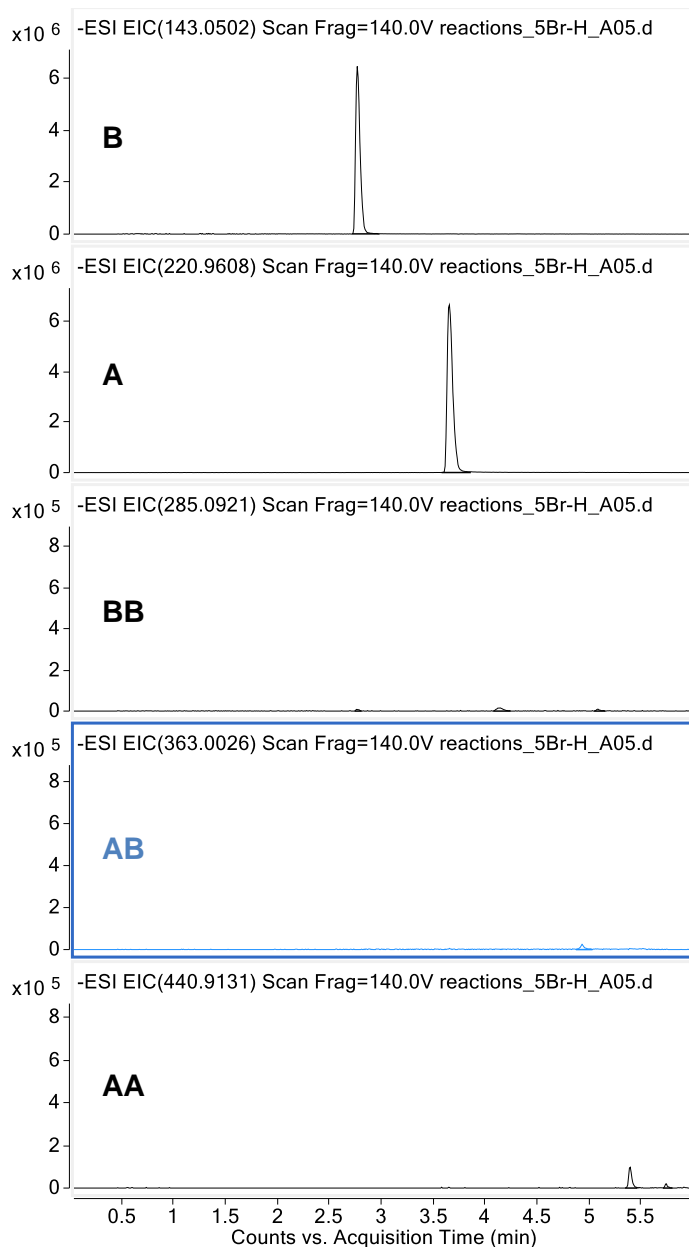

**CYP158A2-RhFRed:**

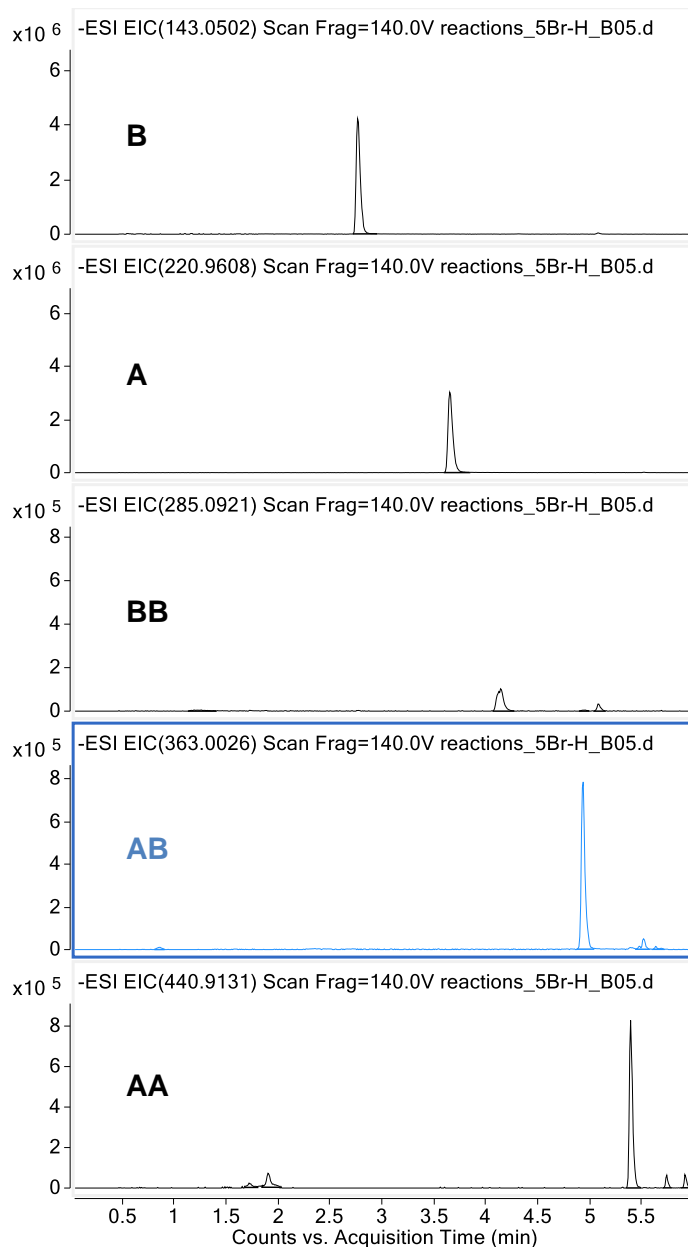



**Supplemental Figure S75.** Oxidative cross-coupling catalyzed by CYP158A2-RhFRed for the formation of **44**. Reactions were performed with 100  $\mu$ M A and 300  $\mu$ M B (**Figure 4**).

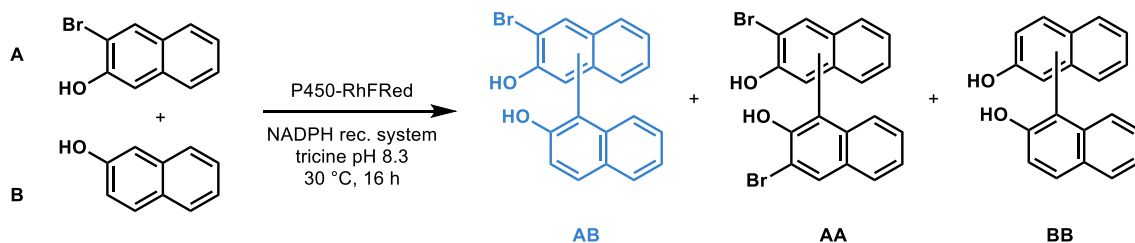

**No enzyme control:**

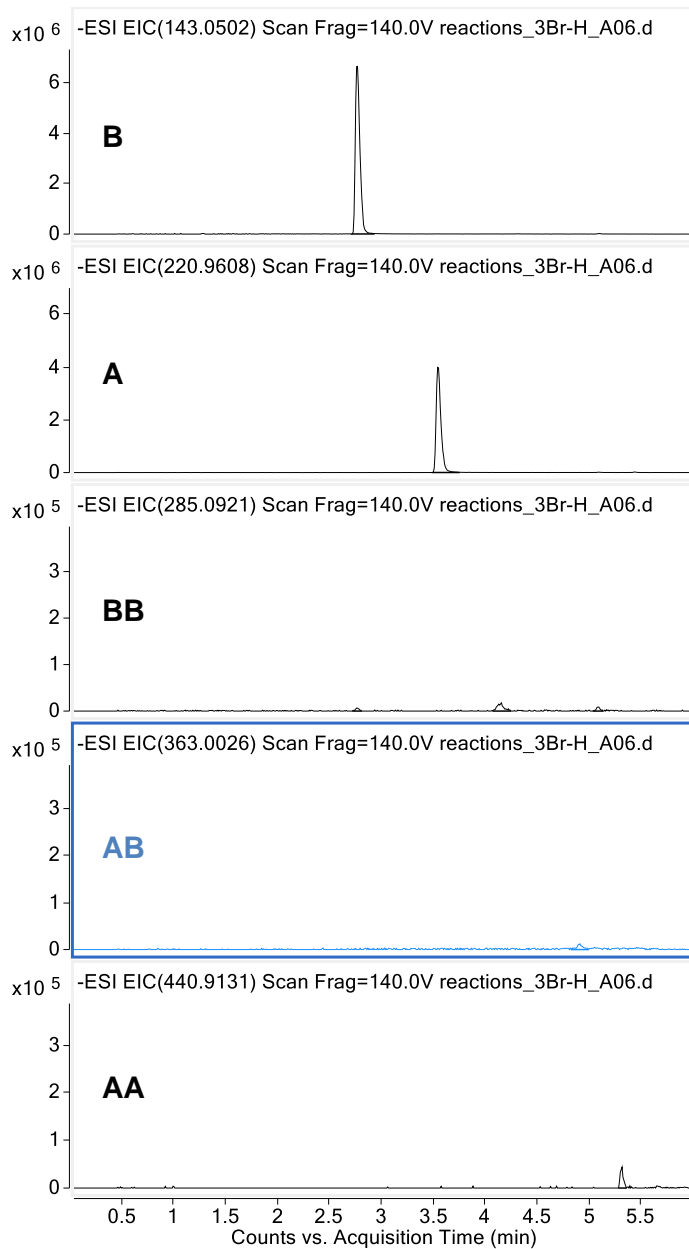

**CYP158A2-RhFRed:**

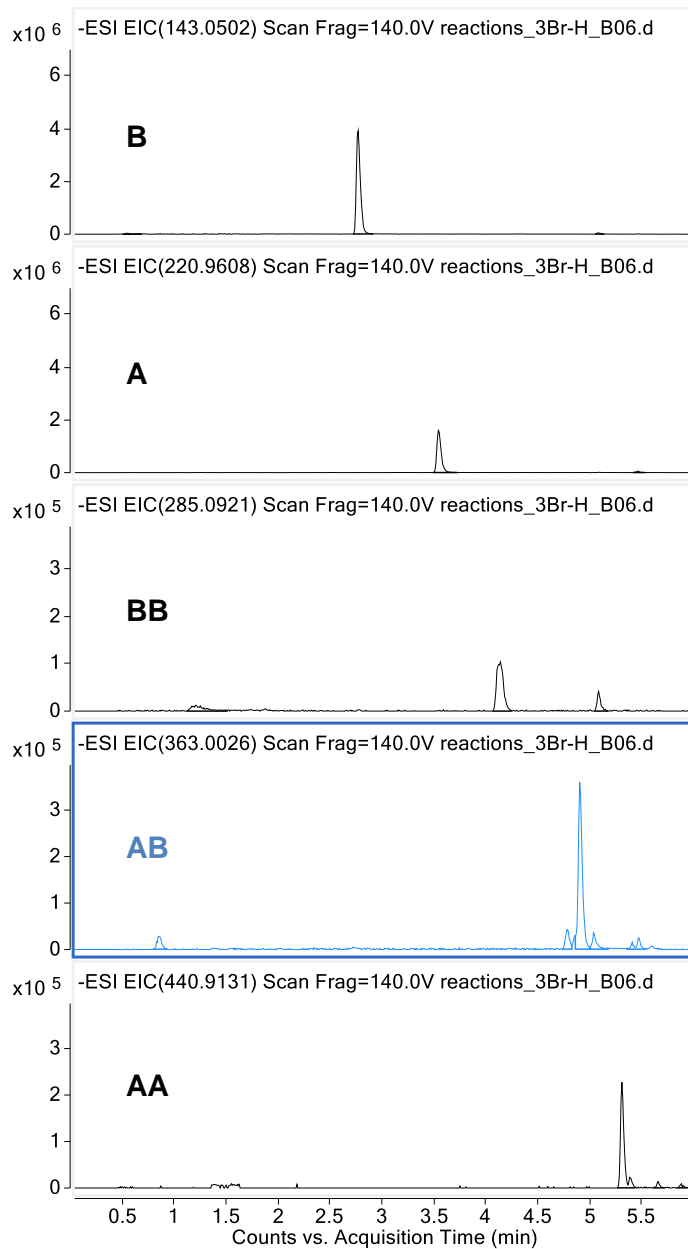

**Supplemental Figure S76.** Oxidative cross-coupling catalyzed by A0A1J4PSC8-RhFRed for the formation of **45**. Reactions were performed with 100  $\mu$ M A and 300  $\mu$ M B (**Figure 4**).

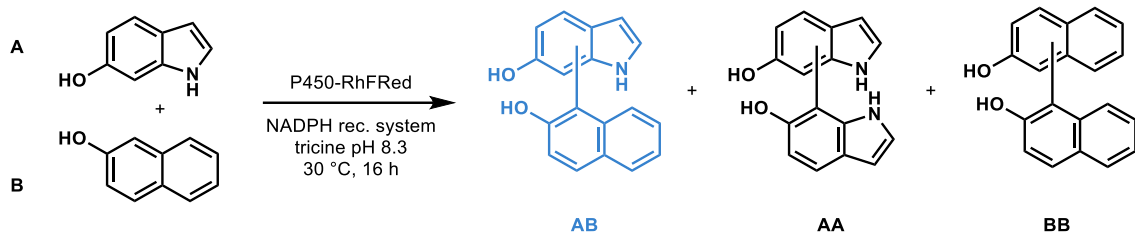

**No enzyme control:**

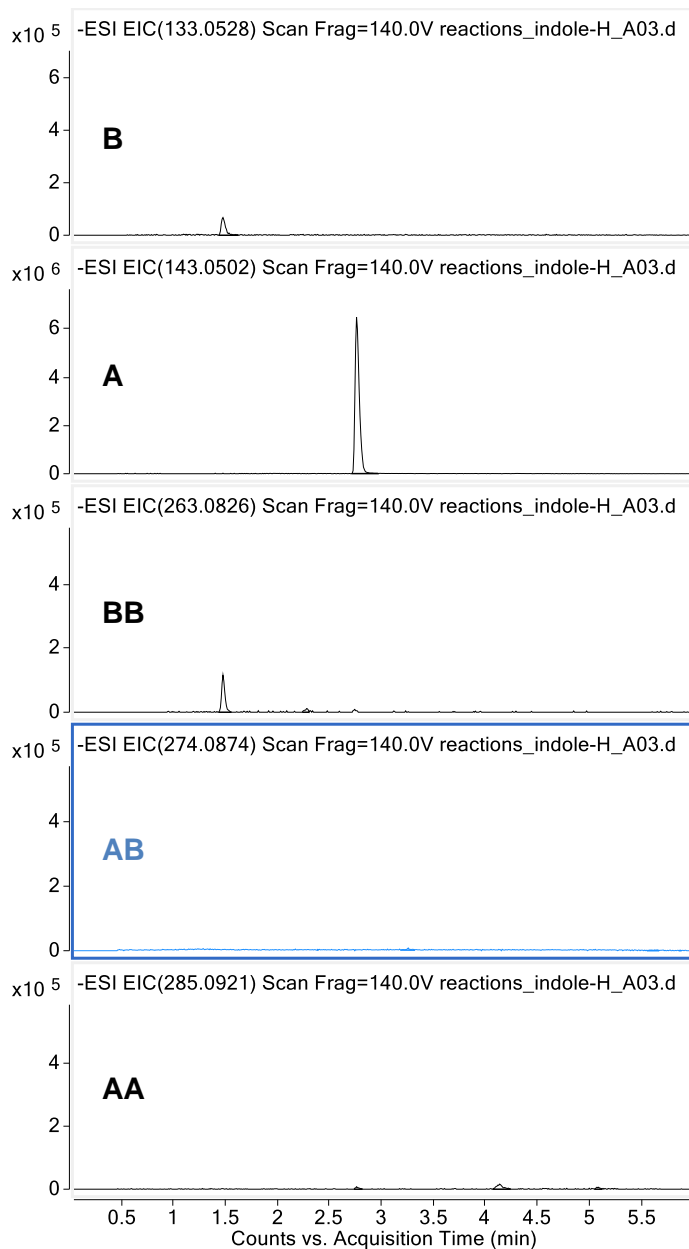

**A0A1J4PSC8-RhFRed:**

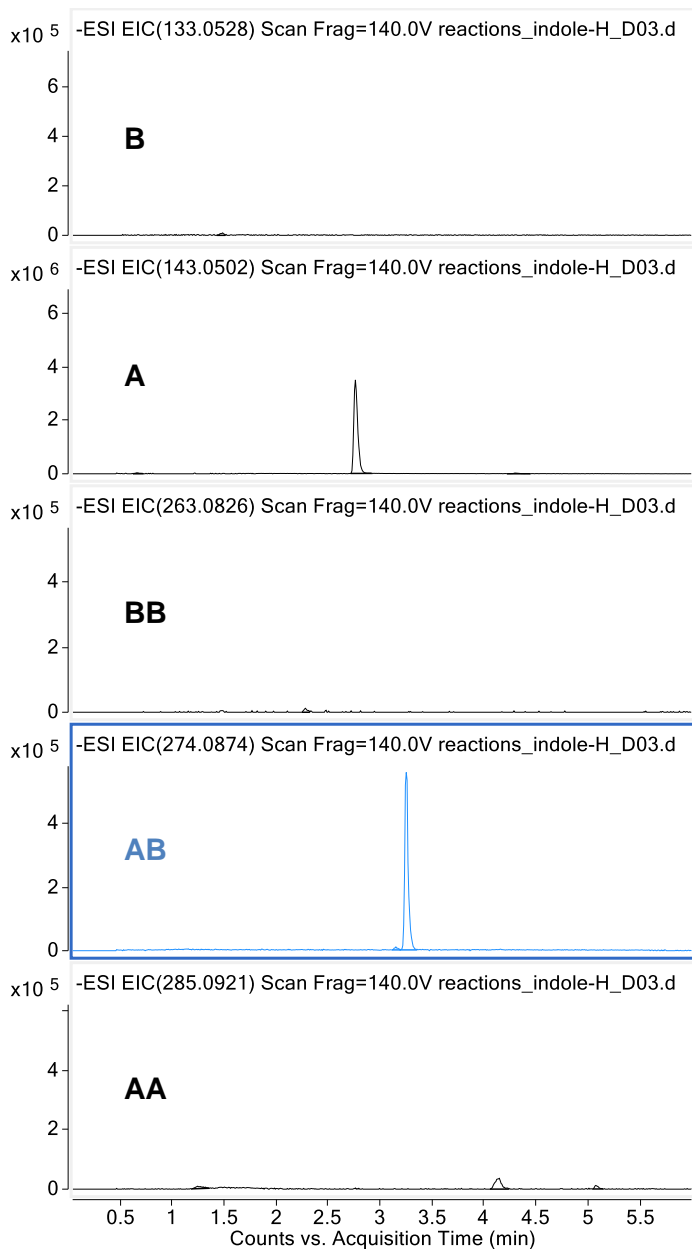

**Supplemental Figure S77.** Oxidative cross-coupling catalyzed by A0A6B3DVM9-RhFRed for the formation of **46**. Reactions were performed with 100  $\mu$ M A and 300  $\mu$ M B (**Figure 4**).

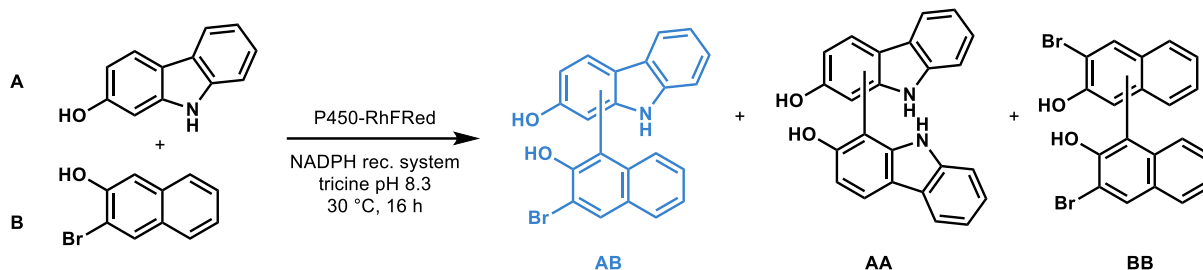

**No enzyme control:**

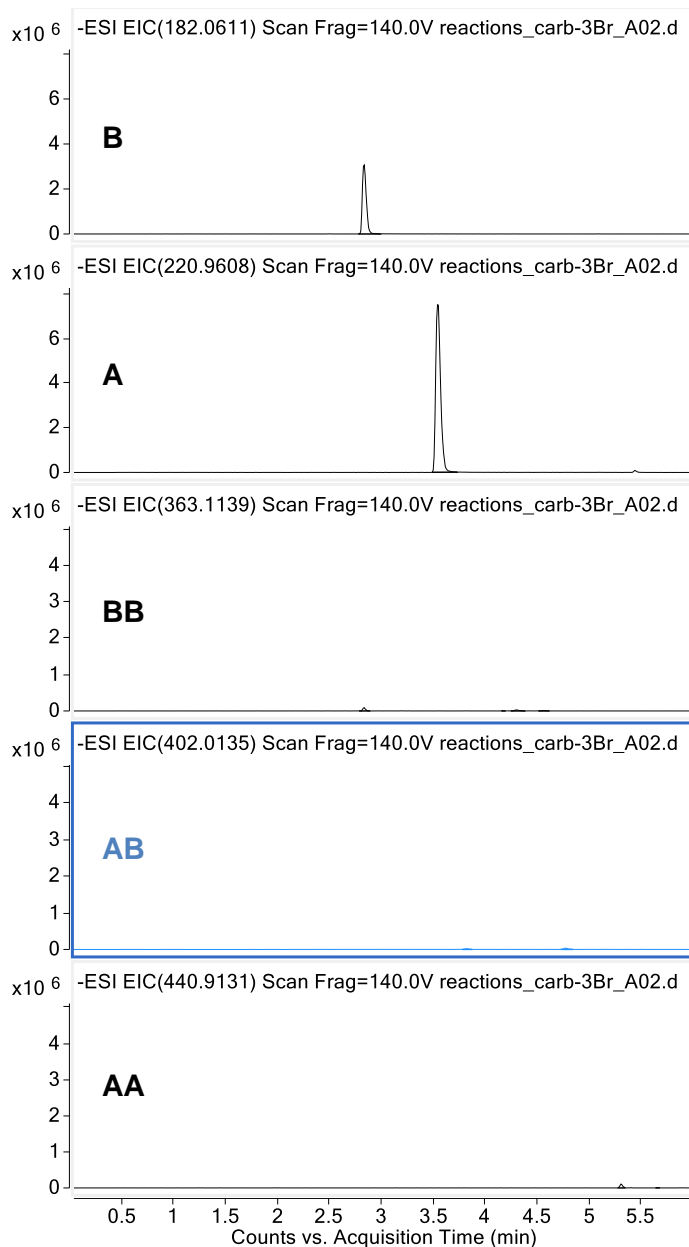

**A0A6B3DVM9-RhFRed:**

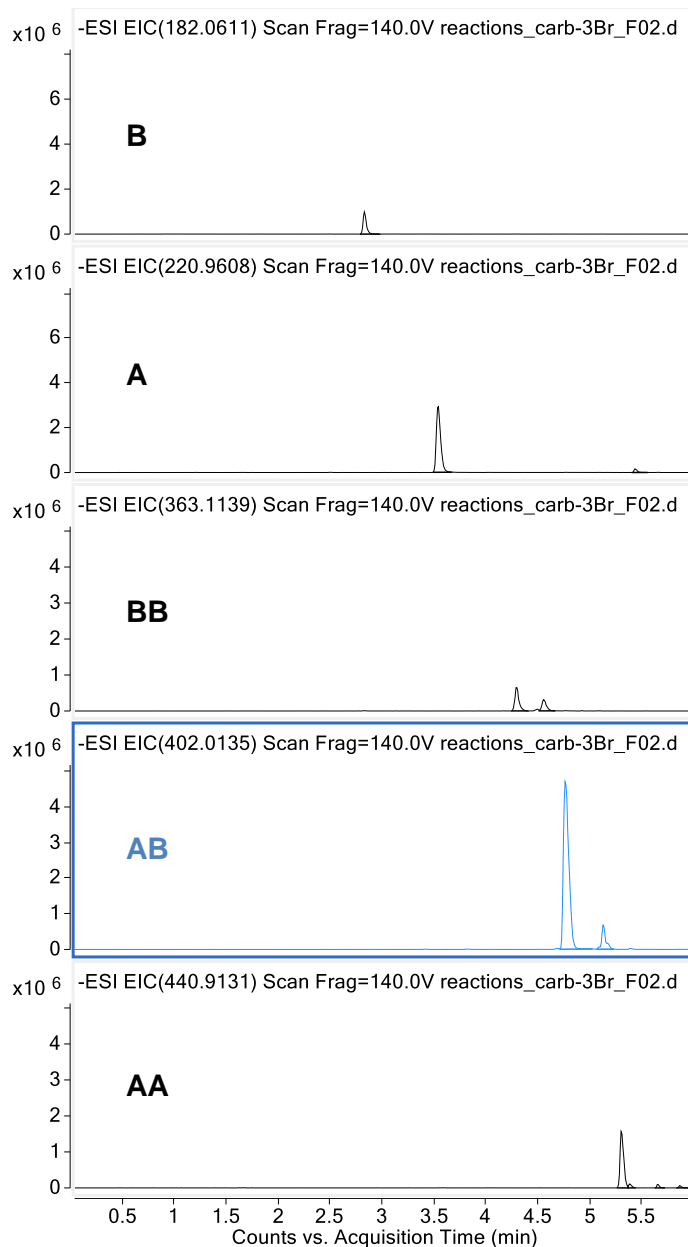

## Site-selectivity of biocatalytic reactions

**Supplemental Figure S78.** Site-selectivity of oxidative cross-coupling catalyzed by CYP158A2-RhFRed for the formation of **32**.

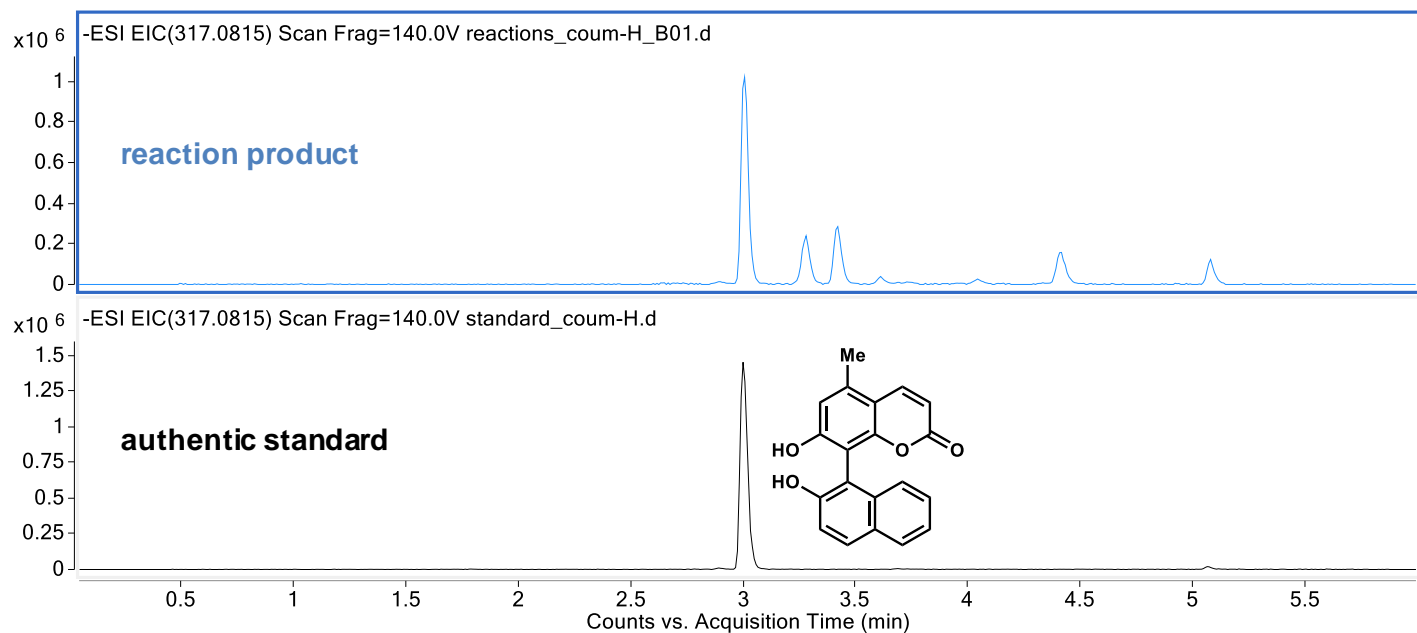

**Supplemental Figure S79.** Site-selectivity of oxidative cross-coupling catalyzed by CYP158A2-RhFRed for the formation of **43**.

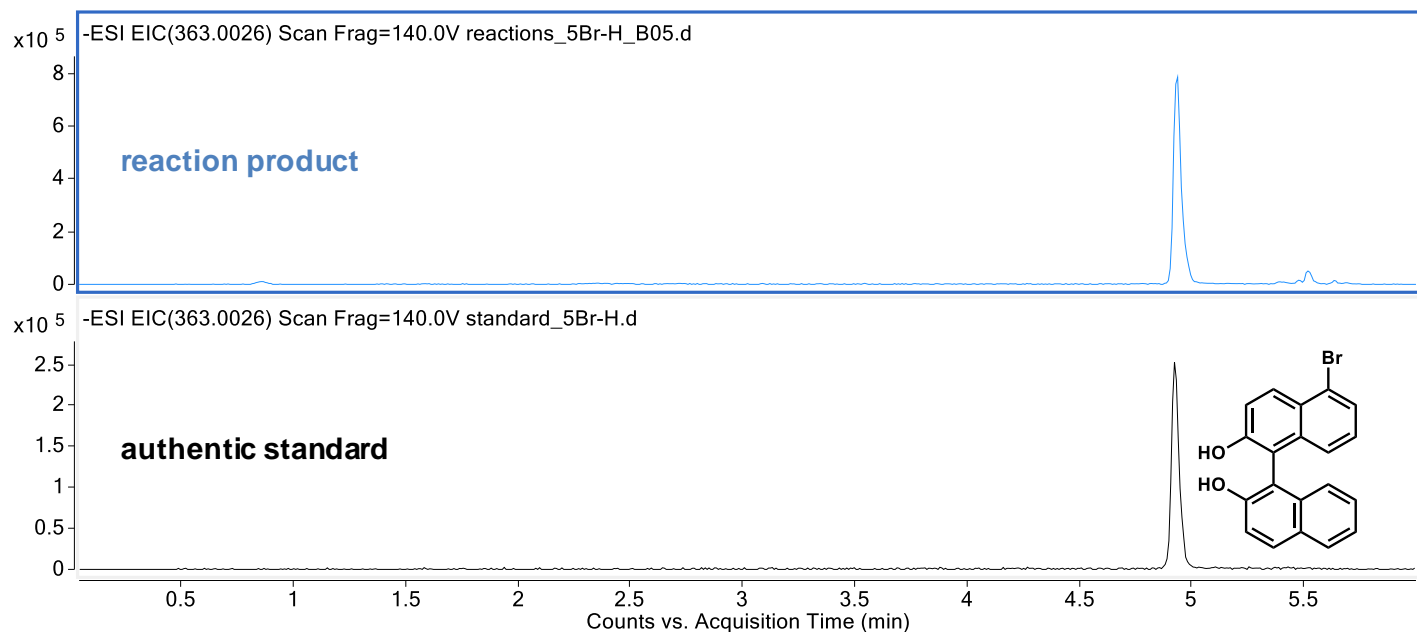

**Supplemental Figure S80.** Site-selectivity of oxidative cross-coupling catalyzed by CYP158A2-RhFRed for the formation of **44**.

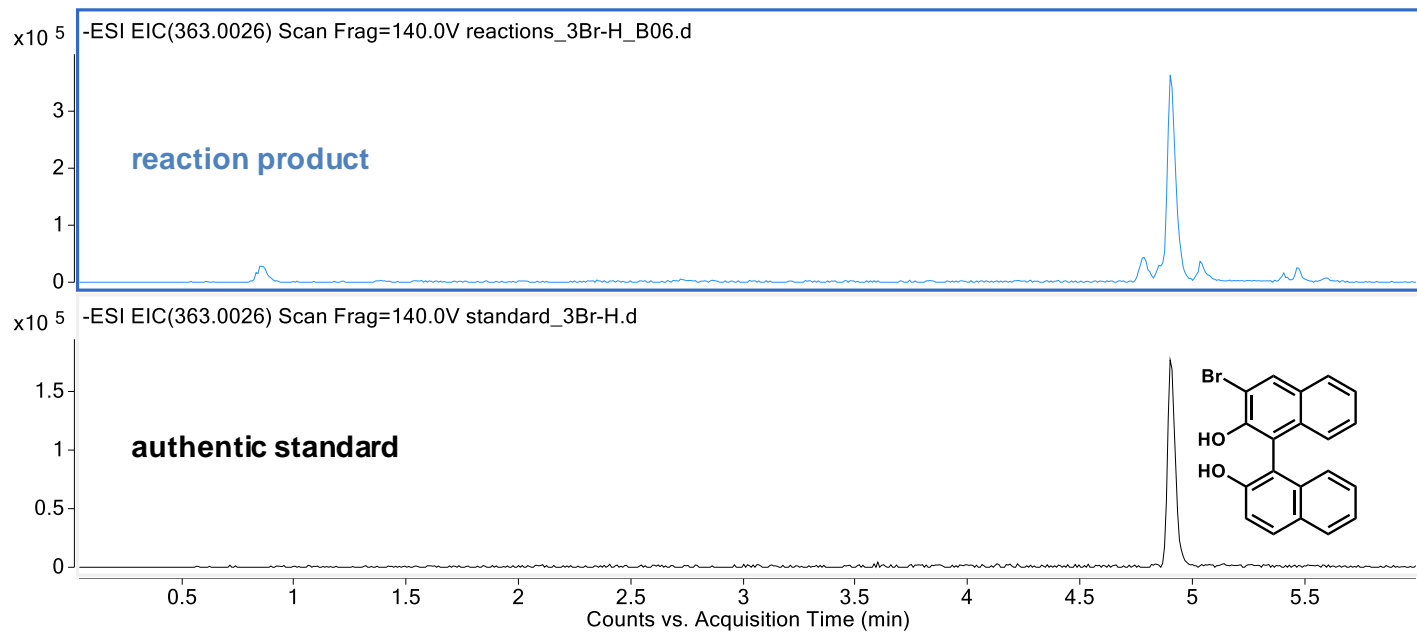

**Supplemental Figure S81.** Site-selectivity of oxidative cross-coupling catalyzed by A0A1J4PSC8-RhFRed for the formation of **45**.

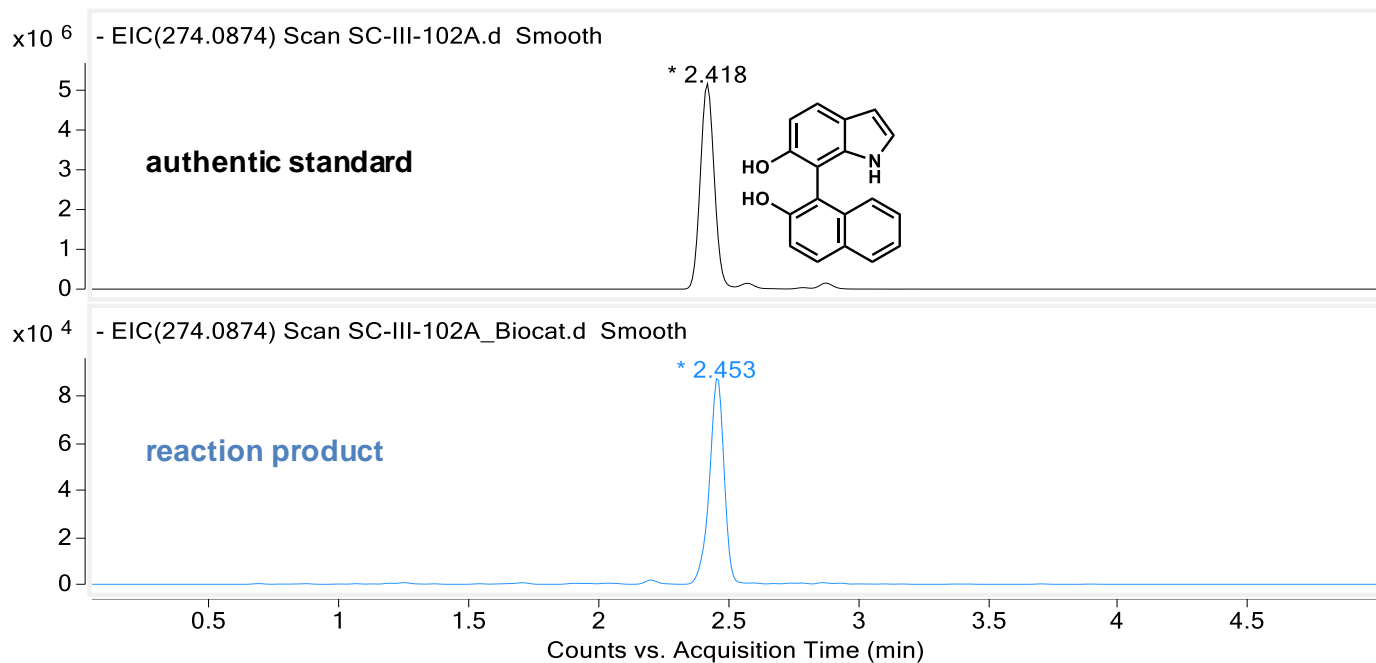

**Supplemental Figure S82.** Site-selectivity of oxidative cross-coupling catalyzed by A0A1J4PSC8-RhFRed for the formation of **46**.

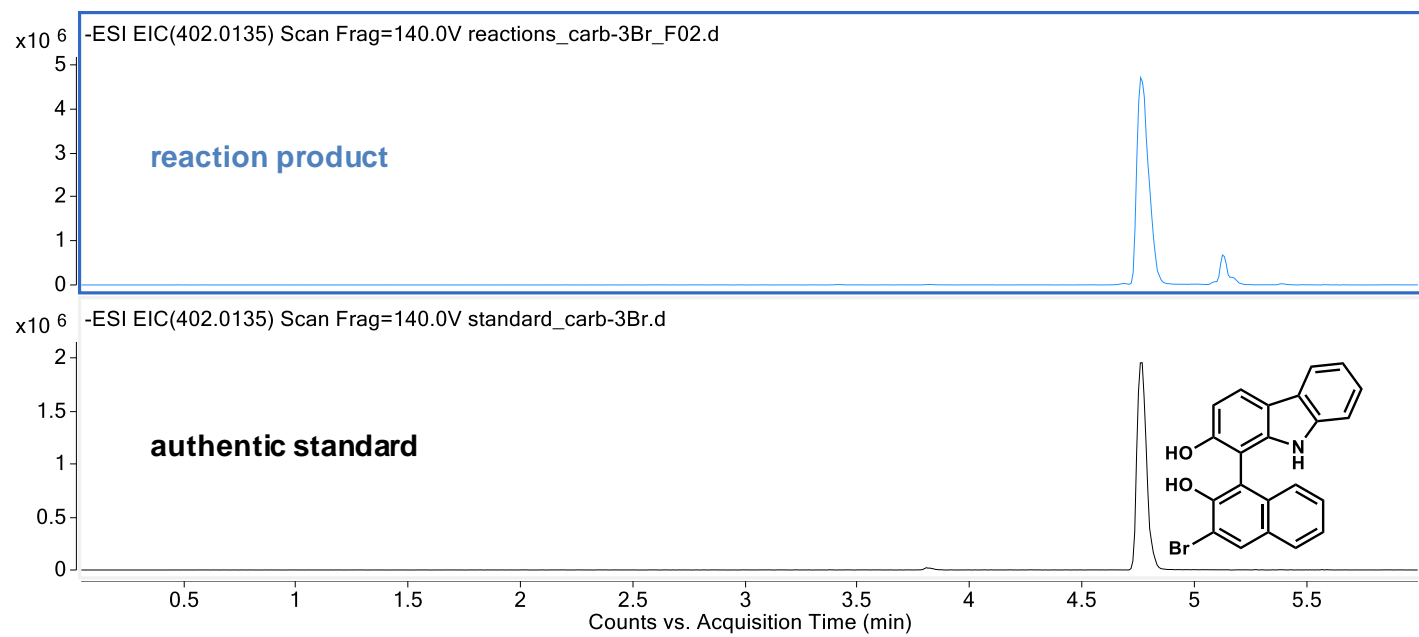

## VI. Preparative scale biocatalytic reactions

**General protocol.** A colony of *P. pastoris* KM71 containing KtnC was inoculated in 5-10 mL BMG medium and grown overnight at 30 °C with shaking at 235 rpm. The starter culture was used to inoculate up to 1 liter of BMG per 2.8-liter baffled flask and grown at 30 °C with shaking at 235 rpm until an optical density at 600 nm between 5 and 14 was obtained. Cultures were induced for expression by centrifugation and resuspension in BMM medium (up to 600 mL per 2.8-L flask). Substrates were added (0.1-0.5 mmol from 50 mM DMSO stocks). Cultures were grown at 30 °C with shaking at 235 rpm for 2-3 d and supplemented with methanol to a final concentration of 0.5% (v/v) every 24 h.

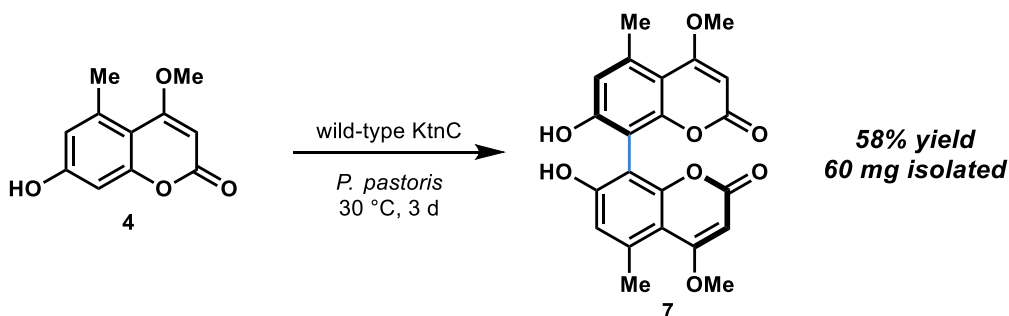

**Biocatalytic dimerization of 7-hydroxy-4-methoxy-5-methyl-2H-chromen-2-one (4).** Cultures containing KtnC were grown and concentrated to an optical density at 600 nm of 30. To 500 mL of KtnC cultures in BMM media in two 2.8-L baffled flasks were added coumarin **4** (5 mL of a 50 mM stock solution in DMSO, 52.0 mg, 0.25 mmol in each flask; 104 mg, 0.5 mmol total) and the resultant mixtures were shaken at 250 rpm for 72 h (95% conversion). Afterwards, the biocatalytic reaction mixtures were combined and centrifuged to separate the cellular matter and the supernatant. The supernatant was extracted with a mixture of toluene and ethyl acetate (1:4 v/v; 400 mL x 3). The cellular matter was vigorously agitated with a mixture of toluene and ethyl acetate (1:4 v/v; 400 mL x 3). The combined organics were concentrated and purified over silica gel chromatography (ethyl acetate: toluene: formic acid = 5:4:1 v/v) to afford the dimeric product **7** as an off-white solid (60 mg, 58% isolated yield).  $R_f = 0.5$  (ethyl acetate : toluene : formic acid = 5:4:1).  $^1\text{H NMR}$  (400 MHz, DMSO- $d_6$ )  $\delta$  6.71 (s, 2H), 5.57 (s, 2H), 4.94 (s, 6H), 2.59 (s, 6H);  $^1\text{H NMR}$  (400 MHz, CD $_3$ OD)  $\delta$  6.75 (s, 2H), 5.59 (s, 2H), 4.00 (s, 6H), 2.67 (s, 6H); **HRMS (ESI)** calculated for C $_{22}$ H $_{19}$ O $_8$  $^+$  [M+H] $^+$  = 411.1074, found = 411.1077 m/z. All spectra obtained were in agreement with literature values.

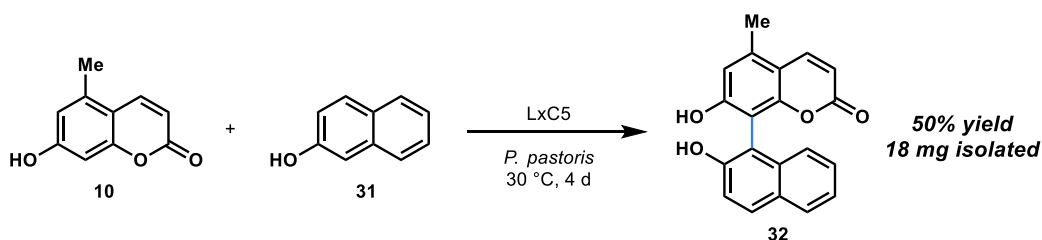

**Biocatalytic cross-coupling of 7-hydroxy-5-methyl-2H-chromen-2-one (10) and 2-naphthol (31).** Cultures containing LxC5 were grown and concentrated to an optical density at 600 nm of 25. Substrate (0.113 mmol coumarin **10** and 0.226 mmol naphthol **31**; concentration of limiting reactant = 0.1 mM) was added from a 50 mM stock in DMSO to a total of 1.135 L BMM separated across two 2.8-L flasks. Cultures were grown at 30 °C with shaking at 200 rpm for 4 d. To isolate the reaction products, the cultures were combined in a 2-L separatory funnel. This mixture was extracted with 1 L of a solvent mixture of 8:1:1 ethyl acetate: toluene: isopropanol. The extraction was repeated a total of three times. The organic extracts were combined, washed with brine (600 mL) and concentrated in a rotary evaporator. The concentrate was purified over silica gel (gradient of 20-80% ethyl acetate in hexanes) to afford the cross-coupling product **32** (18 mg, 50% yield) as a light brown solid. Characterization data of this compound matches those reported for racemic **32** synthesized via chemical method (see page S15).

## VII. Assignment of absolute configurations

**ECD Methodology.** The general approach for absolute configuration assignment using ECD, including the detailed computational workflow, has been published elsewhere.<sup>48-50</sup> A subset of the details of the computational methodology is provided here. Conformers of each test structure were geometry optimized at the B3LYP/6-31G\*\* level and stationary points were confirmed by performing frequency calculations.<sup>51-59</sup> All calculations were performed using Gaussian 09.<sup>60</sup> Output conformers were ranked according to DFT energy and a clustering was performed in order to remove duplicates. Initial duplicate identification was performed solely on an electronic energy basis where two compounds were considered identical if the difference in Hartrees was less than 0.01. Rounding the differences led to inconsistencies in identification of duplicates. It became better to cluster the DFT minima by energy and then re-cluster each energy bucket by structure using an all atom RMS of 0.6 Å. This process removed just identical compounds. Two Boltzmann distributions were calculated based on the free energy (G) and the electronic energy (E).

To calculate UV and ECD spectra, B3LYP geometries were used as input. The spectra were then calculated using either the B3LYP or CAM-B3LYP<sup>61</sup> functionals, along with the 6-31++G\*\* basis set<sup>62,63</sup> in vacuo. Only conformers which contributed more than 5.0% to the total in vacuo conformer distribution were selected for UV and ECD calculation. Time-dependent Density Functional Theory (TDDFT)<sup>64</sup> methodology was employed using the following keywords: TD=full,singlet, Nstates=100, and integral=ultrafinegrid. Spectral display, Boltzmann weighting, and curve fitting were carried out using SpecDis.<sup>65,66</sup> and were displayed with a wavelength shift and band broadening sigma values in order to best match the calculated and experimental UV spectra. This shift and band broadening were then applied to the ECD spectra, and the area under the curve fit was determined by SpecDis. Conformers were visualized using CYLview Version 1.0.<sup>67</sup>

Calculations of the ECD and UV spectra (CAM-B3LYP/6-31++G\*\*) involved modeling the (*P*)-enantiomer of the compound. Hence, the (*P*)-enantiomer had a positive dihedral angle about the atropisomeric bond. Since the atropisomeric bond represents the only stereochemical element in the molecule, the (*M*)-enantiomer is assumed to have a spectrum that will be equal and opposite at all wavelengths.

Absolute configurations were calculated and experimentally validated for compounds (*P*)-**7**, (*P*)-**23**, (*P*)-**S12**, and (*P*)-**32**. A synthetic standard of (*P*)-**24** generated from transesterification of (*P*)-**S12** matched the major atropisomer of biocatalytic product **24**, allowing for the determination of absolute configuration of (*P*)-**24**. The absolute configuration of **25** was assigned based on analogy to (*P*)-**7** and (*P*)-**23**.



**Supplemental Figure S83.** Assignment of absolute configuration of compound **7**. (a) Comparison between compound **7** experimental (black) and calculated (red) UV (top) and ECD (bottom) spectra. The calculated (*P*)-enantiomer is the better match to the experimental spectrum, with a large difference in fits ( $\Delta=0.4760$ ) suggesting a confident assignment. The calculated spectrum has been shifted 25 nm, and a band broadening of 0.25 eV has been applied. (b) Assigned absolute configuration of compound **7** based on ECD analysis. (c) One conformer of the (*P*)-enantiomer of compound **7** that contributes >2% to the Boltzmann distribution. The percentage shown below is based on *in vacuo* electronic energies.

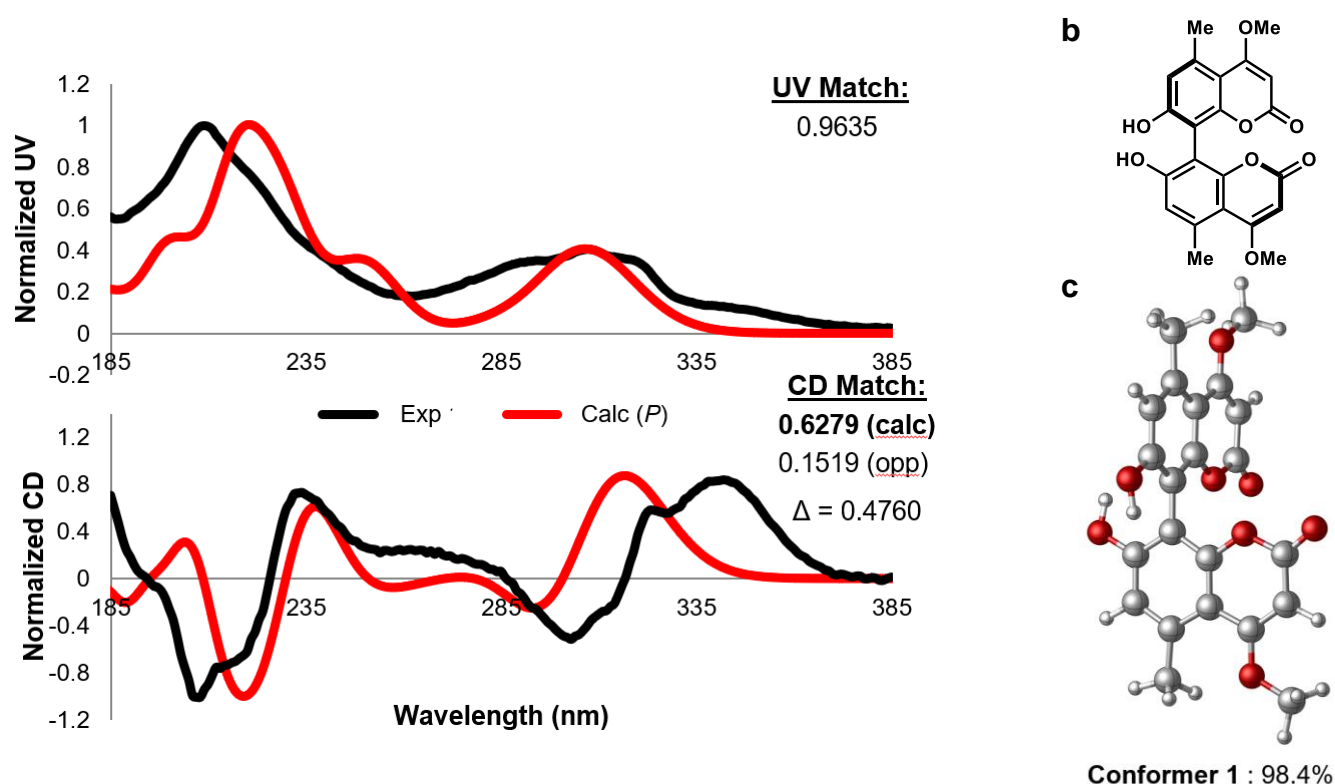

**Supplemental Table S7.** Coordinates and electronic energies for B3LYP/6-31G\*\* conformational minima contributing >2% to the *in vacuo* Boltzmann distribution.

**Conformer 1: -1451.009545 hartrees**

|   |         |         |         |   |         |         |         |
|---|---------|---------|---------|---|---------|---------|---------|
| 6 | -2.441  | 1.9261  | -1.7144 | 6 | 4.784   | 1.1202  | 1.7855  |
| 6 | -1.1174 | 1.9309  | -1.2545 | 8 | -5.1331 | -0.8942 | 0.017   |
| 6 | -0.7066 | 1.0582  | -0.2383 | 6 | -6.0279 | -1.8499 | 0.5841  |
| 6 | -1.6647 | 0.1655  | 0.2749  | 8 | 5.1331  | -0.8942 | -0.017  |
| 6 | -3.0021 | 0.1348  | -0.1802 | 6 | 6.0279  | -1.8499 | -0.5841 |
| 6 | -3.3889 | 1.0482  | -1.2065 | 1 | -5.5301 | 1.343   | -1.0187 |
| 6 | 0.7066  | 1.0582  | 0.2383  | 1 | -4.8272 | 1.9006  | -2.5487 |
| 6 | 1.1174  | 1.9309  | 1.2545  | 1 | -5.0786 | 0.1723  | -2.2427 |
| 6 | 2.441   | 1.9261  | 1.7144  | 1 | 5.0786  | 0.1723  | 2.2427  |
| 6 | 3.3888  | 1.0482  | 1.2065  | 1 | 5.5301  | 1.3431  | 1.0187  |
| 6 | 3.0021  | 0.1348  | 0.1802  | 1 | 4.8272  | 1.9006  | 2.5487  |
| 6 | 1.6647  | 0.1655  | -0.2749 | 1 | -6.9802 | -1.699  | 0.0758  |
| 8 | -1.2069 | -0.6596 | 1.2512  | 1 | -6.1531 | -1.6836 | 1.6595  |
| 6 | -2.0119 | -1.6193 | 1.8856  | 1 | -5.6744 | -2.8718 | 0.4104  |
| 6 | -3.3776 | -1.6815 | 1.4338  | 1 | 6.9802  | -1.699  | -0.0758 |
| 6 | -3.8582 | -0.8569 | 0.4571  | 1 | 6.1531  | -1.6836 | -1.6595 |
| 6 | 3.8582  | -0.8569 | -0.4571 | 1 | 5.6744  | -2.8718 | -0.4104 |
| 6 | 3.3776  | -1.6815 | -1.4338 | 1 | -2.7069 | 2.624   | -2.5006 |
| 6 | 2.012   | -1.6193 | -1.8856 | 1 | 2.7069  | 2.624   | 2.5006  |
| 8 | 1.2069  | -0.6596 | -1.2512 | 1 | -3.9885 | -2.4258 | 1.9228  |
| 8 | -1.4944 | -2.2943 | -2.7443 | 1 | 3.9885  | -2.4257 | -1.9228 |
| 8 | 1.4944  | -2.2943 | -2.7442 | 1 | 0.622   | 2.6629  | -1.4553 |
| 8 | -0.2634 | 2.8131  | -1.8249 | 1 | -0.622  | 2.6629  | 1.4553  |
| 8 | 0.2634  | 2.8131  | 1.8249  |   |         |         |         |
| 6 | -4.784  | 1.1202  | -1.7855 |   |         |         |         |

**Supplemental Figure S84.** Assignment of absolute configuration of compound **23**. (a) Comparison between compound **23** experimental (black) and calculated (red) UV (top) and ECD (bottom) spectra. The calculated (*P*)-enantiomer is the better match to the experimental spectrum, with a large difference in fits ( $\Delta=0.6515$ ) suggesting a confident assignment. The calculated spectrum has been shifted 35 nm, and a band broadening of 0.28 eV has been applied. (b) Assigned absolute configuration of compound **7** based on ECD analysis. (c) Three conformers of the (*P*)-enantiomer of compound **23** that contribute >2% to the Boltzmann distribution. The percentages shown below are based on *in vacuo* electronic energies.

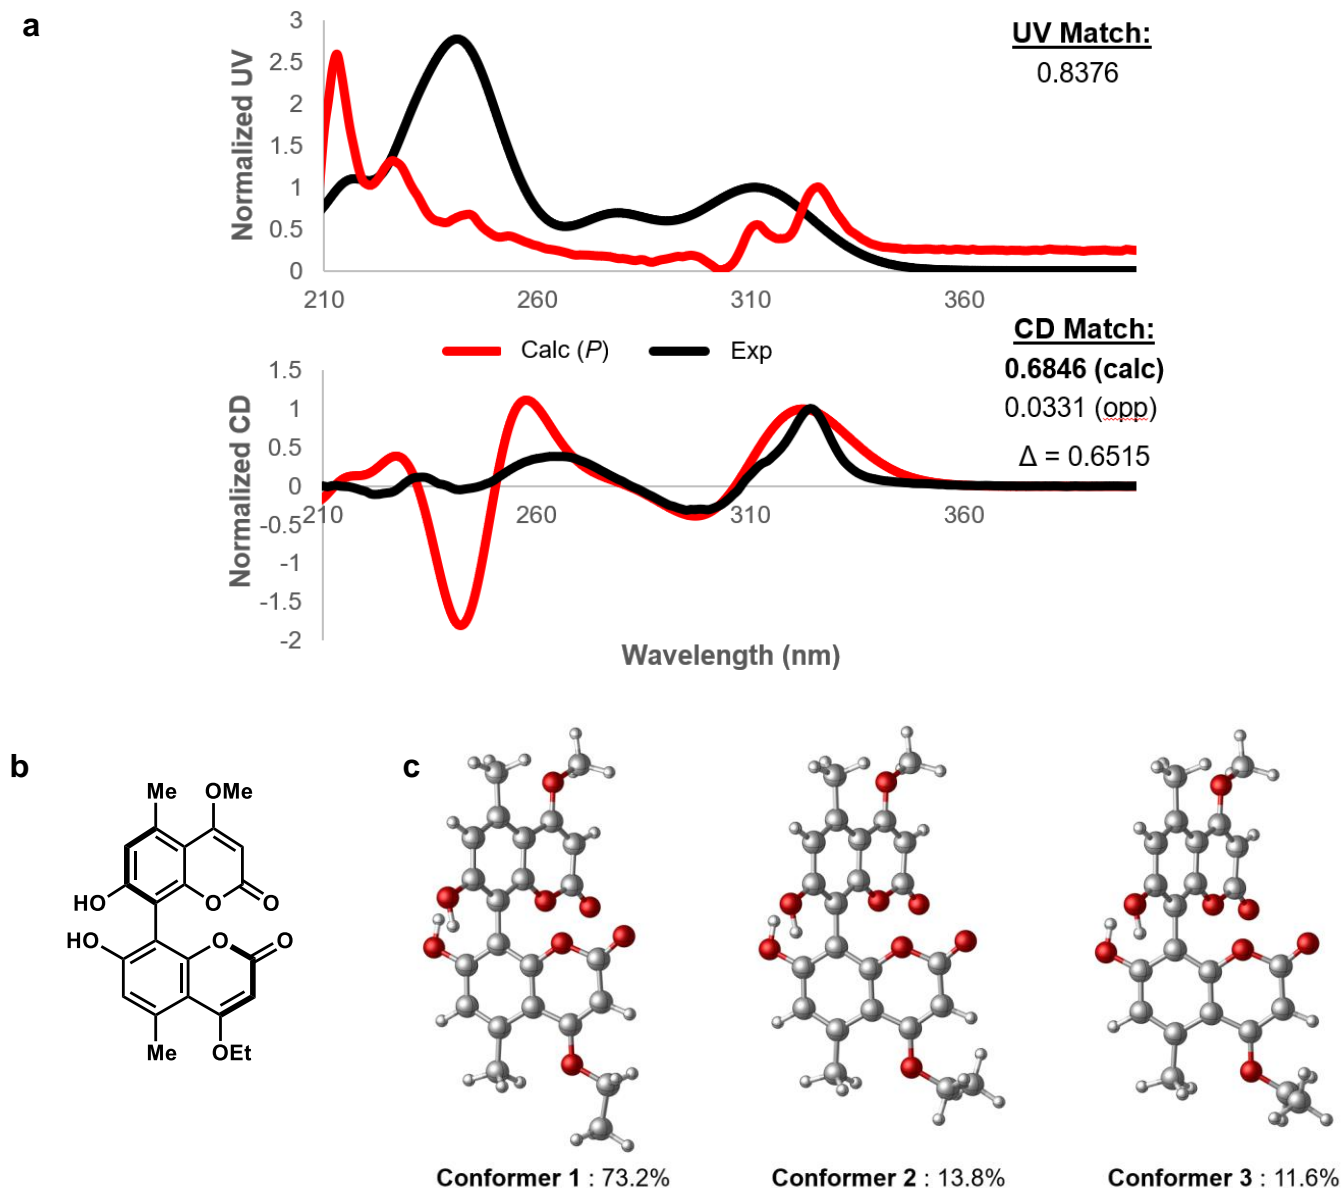

**Supplemental Table S8.** Coordinates and electronic energies for B3LYP/6-31G\*\* conformational minima contributing >2% to the *in vacuo* Boltzmann distribution.

| <u>Conformer 1: -1490.388708 hartrees</u> |          |          |          | <u>Conformer 2: -1490.387127 hartrees</u> |          |          |          | <u>Conformer 3: -1490.386959 hartrees</u> |          |          |          |
|-------------------------------------------|----------|----------|----------|-------------------------------------------|----------|----------|----------|-------------------------------------------|----------|----------|----------|
| 6                                         | 3.00654  | 2.091    | 1.34904  | 6                                         | 3.03459  | 2.08596  | 1.2837   | 6                                         | -2.89076 | 2.01525  | -1.54419 |
| 6                                         | 1.64939  | 2.17655  | 1.01049  | 6                                         | 1.67674  | 2.20954  | 0.959889 | 6                                         | -1.55122 | 2.11525  | -1.14495 |
| 6                                         | 1.05717  | 1.22188  | 0.174126 | 6                                         | 1.04168  | 1.25583  | 0.154478 | 6                                         | -1.00867 | 1.21283  | -0.22143 |
| 6                                         | 1.86656  | 0.16456  | -0.27723 | 6                                         | 1.80892  | 0.160771 | -0.2804  | 6                                         | -1.84782 | 0.190449 | 0.255349 |
| 6                                         | 3.22878  | 0.043125 | 0.071565 | 6                                         | 3.17056  | 0.001163 | 0.05483  | 6                                         | -3.1923  | 0.054139 | -0.15198 |
| 6                                         | 3.80604  | 1.04627  | 0.90592  | 6                                         | 3.79239  | 1.00406  | 0.85684  | 6                                         | -3.71962 | 1.005    | -1.07575 |
| 8                                         | 0.948149 | 3.22164  | 1.51719  | 8                                         | 1.01801  | 3.28994  | 1.4494   | 8                                         | -0.81725 | 3.12229  | -1.68153 |
| 8                                         | 1.23522  | -0.72538 | -1.08244 | 8                                         | 1.13745  | -0.72643 | -1.05564 | 8                                         | -1.26407 | -0.64975 | 1.1454   |
| 6                                         | 1.86381  | -1.86371 | -1.60633 | 6                                         | 1.71937  | -1.89917 | -1.55664 | 6                                         | -1.92741 | -1.74863 | 1.7093   |
| 6                                         | 3.25056  | -2.02726 | -1.2522  | 6                                         | 3.10434  | -2.1013  | -1.21586 | 6                                         | -3.2965  | -1.92707 | 1.29817  |
| 6                                         | 3.90923  | -1.12934 | -0.46207 | 6                                         | 3.80364  | -1.20687 | -0.45725 | 6                                         | -3.90799 | -1.07818 | 0.420764 |
| 8                                         | 1.19814  | -2.59073 | -2.30578 | 8                                         | 1.01964  | -2.62077 | -2.22806 | 8                                         | -1.30313 | -2.43289 | 2.48577  |
| 6                                         | -0.38399 | 1.30095  | -0.17666 | 6                                         | -0.40018 | 1.37542  | -0.18144 | 6                                         | 0.414074 | 1.30729  | 0.194771 |
| 6                                         | -0.86778 | 2.31233  | -1.01598 | 6                                         | -0.86071 | 2.38418  | -1.03669 | 6                                         | 0.86332  | 2.36701  | 0.992464 |
| 6                                         | -2.22643 | 2.3763   | -1.35277 | 6                                         | -2.22017 | 2.48396  | -1.36117 | 6                                         | 2.20443  | 2.4464   | 1.39063  |
| 6                                         | -3.13609 | 1.42782  | -0.90519 | 6                                         | -3.15458 | 1.57417  | -0.88529 | 6                                         | 3.12819  | 1.46826  | 1.04827  |
| 6                                         | -2.67247 | 0.369404 | -0.06814 | 6                                         | -2.71592 | 0.518721 | -0.03051 | 6                                         | 2.69863  | 0.360879 | 0.256952 |
| 6                                         | -1.3048  | 0.340963 | 0.279109 | 6                                         | -1.34601 | 0.45484  | 0.303578 | 6                                         | 1.34917  | 0.317069 | -0.15478 |
| 8                                         | -0.05581 | 3.2719   | -1.52708 | 8                                         | -0.02465 | 3.30667  | -1.5763  | 8                                         | 0.034269 | 3.35985  | 1.40218  |
| 6                                         | -3.47884 | -0.71901 | 0.469762 | 6                                         | -3.55126 | -0.53399 | 0.534911 | 6                                         | 3.52423  | -0.76169 | -0.17193 |
| 6                                         | -2.92148 | -1.6806  | 1.26389  | 6                                         | -3.01143 | -1.49975 | 1.33668  | 6                                         | 2.99821  | -1.76398 | -0.93721 |
| 6                                         | -1.52519 | -1.66978 | 1.61652  | 6                                         | -1.6138  | -1.52206 | 1.68023  | 6                                         | 1.62042  | -1.77176 | -1.35405 |
| 8                                         | -0.77454 | -0.61008 | 1.0871   | 8                                         | -0.83668 | -0.49508 | 1.12583  | 8                                         | 0.851461 | -0.67972 | -0.92724 |
| 8                                         | -0.94258 | -2.46279 | 2.31857  | 8                                         | -1.04918 | -2.31907 | 2.39274  | 8                                         | 1.06756  | -2.60499 | -2.03356 |
| 8                                         | 5.20756  | -1.25394 | -0.11801 | 8                                         | 5.10143  | -1.36722 | -0.12624 | 8                                         | -5.18888 | -1.21757 | 0.021422 |
| 6                                         | 5.9372   | -2.38932 | -0.58101 | 6                                         | 5.78597  | -2.53815 | -0.56919 | 6                                         | -5.95018 | -2.31681 | 0.519389 |
| 8                                         | -4.78155 | -0.70133 | 0.126059 | 8                                         | -4.85775 | -0.46491 | 0.210346 | 8                                         | 4.80329  | -0.72646 | 0.252065 |
| 6                                         | -7.02861 | -1.46264 | 0.026186 | 6                                         | -5.68203 | -2.73371 | -0.23043 | 6                                         | 6.27928  | -1.56477 | -1.52004 |
| 6                                         | -5.64882 | -1.74886 | 0.587351 | 6                                         | -5.7752  | -1.48781 | 0.639909 | 6                                         | 5.72713  | -1.76719 | -0.11539 |
| 6                                         | 5.25271  | 1.0353   | 1.34482  | 6                                         | 5.24348  | 0.954172 | 1.27807  | 6                                         | -5.14312 | 0.973458 | -1.58398 |
| 6                                         | -4.57554 | 1.57713  | -1.34269 | 6                                         | -4.59233 | 1.76051  | -1.31453 | 6                                         | 4.54566  | 1.64159  | 1.5451   |
| 1                                         | 6.94252  | -2.27779 | -0.17449 | 1                                         | 6.79984  | -2.45085 | -0.17827 | 1                                         | -6.93341 | -2.22599 | 0.057462 |
| 1                                         | 5.98218  | -2.41097 | -1.67581 | 1                                         | 5.81551  | -2.58882 | -1.66355 | 1                                         | -6.04881 | -2.26788 | 1.60978  |
| 1                                         | 5.49161  | -3.32084 | -0.2145  | 1                                         | 5.31406  | -3.44439 | -0.17339 | 1                                         | -5.49535 | -3.27241 | 0.235529 |
| 1                                         | -7.73103 | -2.23593 | 0.350456 | 1                                         | -6.43093 | -3.46566 | 0.087914 | 1                                         | 7.02051  | -2.33861 | -1.74288 |
| 1                                         | -7.39311 | -0.49284 | 0.375673 | 1                                         | -5.87031 | -2.47673 | -1.27636 | 1                                         | 5.49001  | -1.61684 | -2.27341 |
| 1                                         | -7.00433 | -1.45097 | -1.06679 | 1                                         | -4.69562 | -3.1979  | -0.16349 | 1                                         | 6.76442  | -0.58777 | -1.59646 |
| 1                                         | 5.93172  | 1.04268  | 0.488662 | 1                                         | 5.91099  | 0.917116 | 0.413685 | 1                                         | -5.86311 | 1.03886  | -0.76457 |
| 1                                         | 5.46263  | 1.91005  | 1.96467  | 1                                         | 5.49122  | 1.83616  | 1.87321  | 1                                         | -5.31525 | 1.80796  | -2.26769 |
| 1                                         | 5.48696  | 0.136182 | 1.91994  | 1                                         | 5.45452  | 0.061941 | 1.87259  | 1                                         | -5.35635 | 0.0407   | -2.11176 |
| 1                                         | -4.90906 | 0.709063 | -1.91631 | 1                                         | -4.95961 | 0.890162 | -1.86356 | 1                                         | 4.84458  | 0.813002 | 2.19163  |
| 1                                         | -5.24867 | 1.65974  | -0.48601 | 1                                         | -5.25446 | 1.88739  | -0.45464 | 1                                         | 5.2603   | 1.66437  | 0.718889 |
| 1                                         | -4.6876  | 2.46934  | -1.96309 | 1                                         | -4.67997 | 2.6403   | -1.95632 | 1                                         | 4.63305  | 2.57323  | 2.10902  |
| 1                                         | -5.26713 | -2.71674 | 0.238418 | 1                                         | -5.61792 | -1.70977 | 1.70153  | 1                                         | 6.52271  | -1.68552 | 0.629193 |
| 1                                         | -5.65686 | -1.75835 | 1.6849   | 1                                         | -6.75607 | -1.01664 | 0.540261 | 1                                         | 5.25367  | -2.74763 | 0.007818 |
| 1                                         | 3.41482  | 2.86034  | 1.99476  | 1                                         | 3.47709  | 2.85634  | 1.90519  | 1                                         | -3.26053 | 2.74395  | -2.25679 |
| 1                                         | 3.7233   | -2.90884 | -1.65821 | 1                                         | 3.54132  | -3.00869 | -1.60469 | 1                                         | -3.79605 | -2.77825 | 1.73572  |
| 1                                         | -2.54801 | 3.18405  | -2.00059 | 1                                         | -2.52285 | 3.28772  | -2.0229  | 1                                         | 2.49988  | 3.29209  | 2.0014   |
| 1                                         | -3.48804 | -2.50295 | 1.67378  | 1                                         | -3.59442 | -2.30301 | 1.76102  | 1                                         | 3.57788  | -2.60915 | -1.27602 |
| 1                                         | 0.010019 | 3.10222  | 1.29909  | 1                                         | 0.073306 | 3.19684  | 1.24744  | 1                                         | 0.107906 | 3.01229  | -1.40964 |
| 1                                         | 0.863735 | 3.04981  | -1.31041 | 1                                         | 0.889856 | 3.06047  | -1.3645  | 1                                         | -0.87501 | 3.12869  | 1.15387  |

**Supplemental Figure S85.** Assignment of absolute configuration of compound **S12**. (a) Comparison between compound **S12** experimental (black) and calculated (red) UV (top) and ECD (bottom) spectra. The calculated (*P*)-enantiomer is the better match to the experimental spectrum, with a large difference in fits ( $\Delta=0.8851$ ) suggesting a confident assignment. The calculated spectrum has been shifted 26 nm, and a band broadening of 0.27 eV has been applied. (b) Assigned absolute configuration of compound **S12** based on ECD analysis. (c) One conformer of the (*P*)-enantiomer of compound **S12** that contributes >2% to the Boltzmann distribution. Note the percentage shown above based is on *in vacuo* electronic energies.

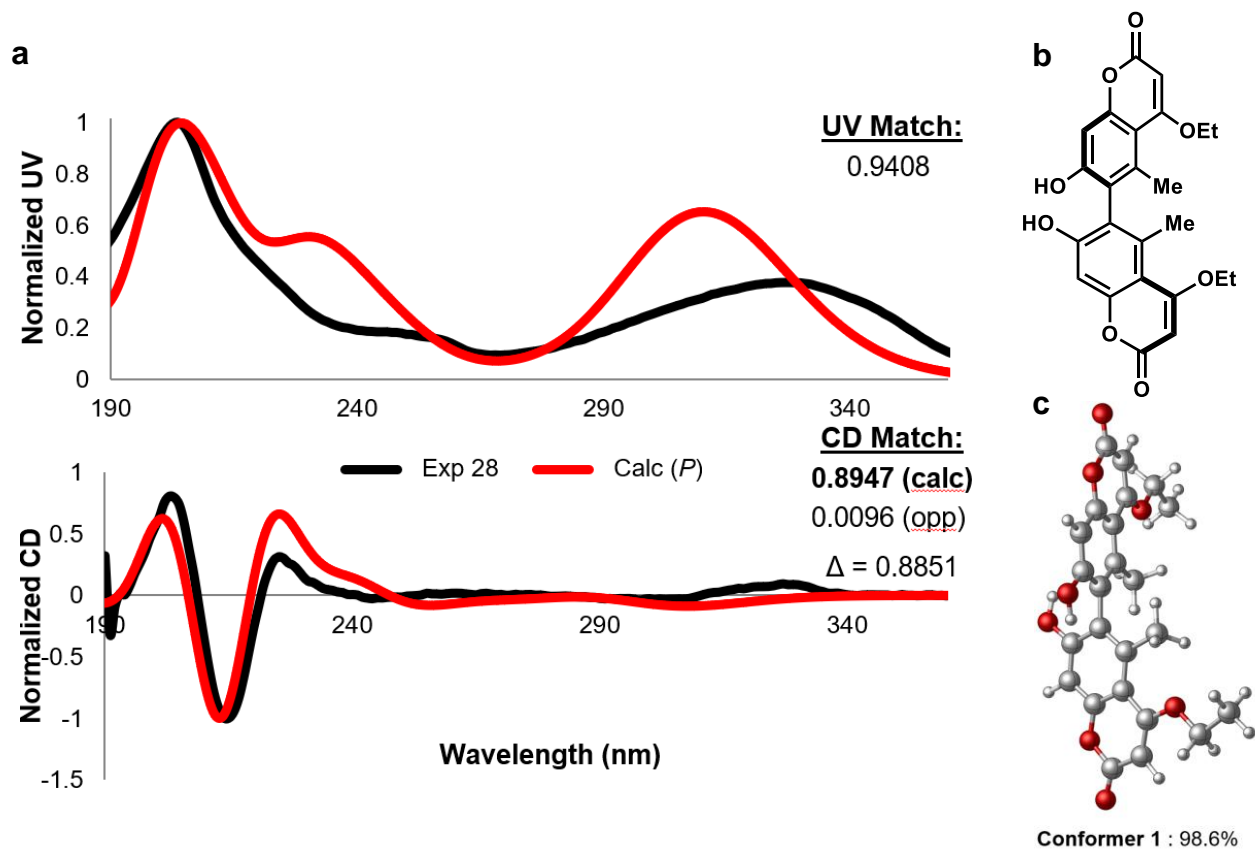

**Supplemental Table S9.** Coordinates and electronic energies for B3LYP/6-31G\*\* conformational minima contributing >2% to the *in vacuo* Boltzmann distribution.

**Conformer 1: -1529.649257 hartrees**

|   |          |          |          |   |          |          |          |
|---|----------|----------|----------|---|----------|----------|----------|
| 6 | 0.993835 | -1.36762 | 1.58732  | 6 | -4.67607 | -3.19131 | -2.85185 |
| 6 | 2.27617  | -1.88631 | 1.67206  | 8 | 6.69336  | -1.99489 | 0.618902 |
| 6 | 3.29272  | -1.28967 | 0.934152 | 8 | 4.05869  | 1.42718  | -1.36978 |
| 6 | 3.06548  | -0.16998 | 0.097387 | 6 | 5.18127  | 1.99715  | -2.0648  |
| 6 | 1.73861  | 0.345697 | 0.003389 | 6 | 4.67611  | 3.19129  | -2.85187 |
| 6 | 0.708267 | -0.25201 | 0.755957 | 1 | 1.6966   | 1.31773  | -1.92614 |
| 6 | -0.70827 | 0.252022 | 0.755954 | 1 | 0.314337 | 1.6956   | -0.88677 |
| 6 | -1.73862 | -0.34569 | 0.00339  | 1 | 1.90001  | 2.42719  | -0.58903 |
| 6 | -3.06548 | 0.169983 | 0.097381 | 1 | -1.90002 | -2.42719 | -0.58901 |
| 6 | -3.29273 | 1.28968  | 0.934138 | 1 | -1.69661 | -1.31774 | -1.92613 |
| 6 | -2.27617 | 1.88633  | 1.67205  | 1 | -0.31435 | -1.69561 | -0.88675 |
| 6 | -0.99384 | 1.36764  | 1.5873   | 1 | -5.50678 | -3.65248 | -3.39403 |
| 6 | -4.2485  | -0.34451 | -0.58928 | 1 | -3.91746 | -2.88772 | -3.57828 |
| 6 | -5.46615 | 0.252746 | -0.42561 | 1 | -4.24055 | -3.94167 | -2.18658 |
| 6 | -5.65864 | 1.40231  | 0.421597 | 1 | 5.50682  | 3.65245  | -3.39405 |
| 8 | -4.51421 | 1.86567  | 1.08361  | 1 | 3.91749  | 2.88769  | -3.5783  |
| 8 | 4.51421  | -1.86565 | 1.08364  | 1 | 4.24058  | 3.94166  | -2.18661 |
| 6 | 5.65864  | -1.40229 | 0.421629 | 1 | -5.94351 | -2.29435 | -1.33418 |
| 6 | 5.46615  | -0.25275 | -0.4256  | 1 | -5.61833 | -1.23939 | -2.72658 |
| 6 | 4.2485   | 0.344502 | -0.58928 | 1 | 5.94353  | 2.29432  | -1.33418 |
| 6 | 1.38819  | 1.51207  | -0.89724 | 1 | 5.61834  | 1.23936  | -2.72657 |
| 6 | -1.3882  | -1.51207 | -0.89723 | 1 | 2.49284  | -2.73967 | 2.30216  |
| 8 | 0.026    | -1.96831 | 2.31866  | 1 | -2.49285 | 2.73969  | 2.30214  |
| 8 | -0.02601 | 1.96833  | 2.31865  | 1 | -6.35891 | -0.10275 | -0.91771 |
| 8 | -6.69337 | 1.99488  | 0.618899 | 1 | 6.35891  | 0.102734 | -0.91772 |
| 8 | -4.05868 | -1.42719 | -1.36976 | 1 | -0.80855 | -1.49468 | 2.16741  |
| 6 | -5.18126 | -1.99717 | -2.06479 | 1 | 0.808541 | 1.4947   | 2.1674   |

**Supplemental Figure S86.** Assignment of absolute configurations of compound **32**. Experimental Circular dichroism (CD) spectra were collected on a J-1500 Circular Dichroism Spectrophotometer (Jasco) coupled with an Agilent HPLC. A chiral column (CHIRALPAK IC-3) was used to separate the enantiomers of compound **32** and experimental CD was obtained for the first peak (rt = 3.1 min) and this was compared against calculated CD. (a) Comparison between compound **32** (racemic, peak 1) experimental (black) and calculated (red) UV (top) and ECD (bottom) spectra. The calculated (*M*)-enantiomer is the better match to the experimental spectrum, with a large difference in fit ( $\Delta=0.6360$ ) suggesting a confident assignment. The calculated spectrum has been shifted 14 nm, and a band broadening of 0.30 eV has been applied. (b) One conformer of the (*M*)-enantiomer of compound **32** that contribute >2% to the Boltzmann distribution. The percentage shown below is based on *in vacuo* electronic energies. (c) Assigned absolute configurations of compound **32** based on ECD analysis. The first peak (rt = 3.1 min) for compound **32** in chiral HPLC (CHIRALPAK IC-3) is the *M*-isomer. The second peak (rt = 3.4 min) is the major atropisomer obtained using LxC7 and is therefore the *P*-isomer.

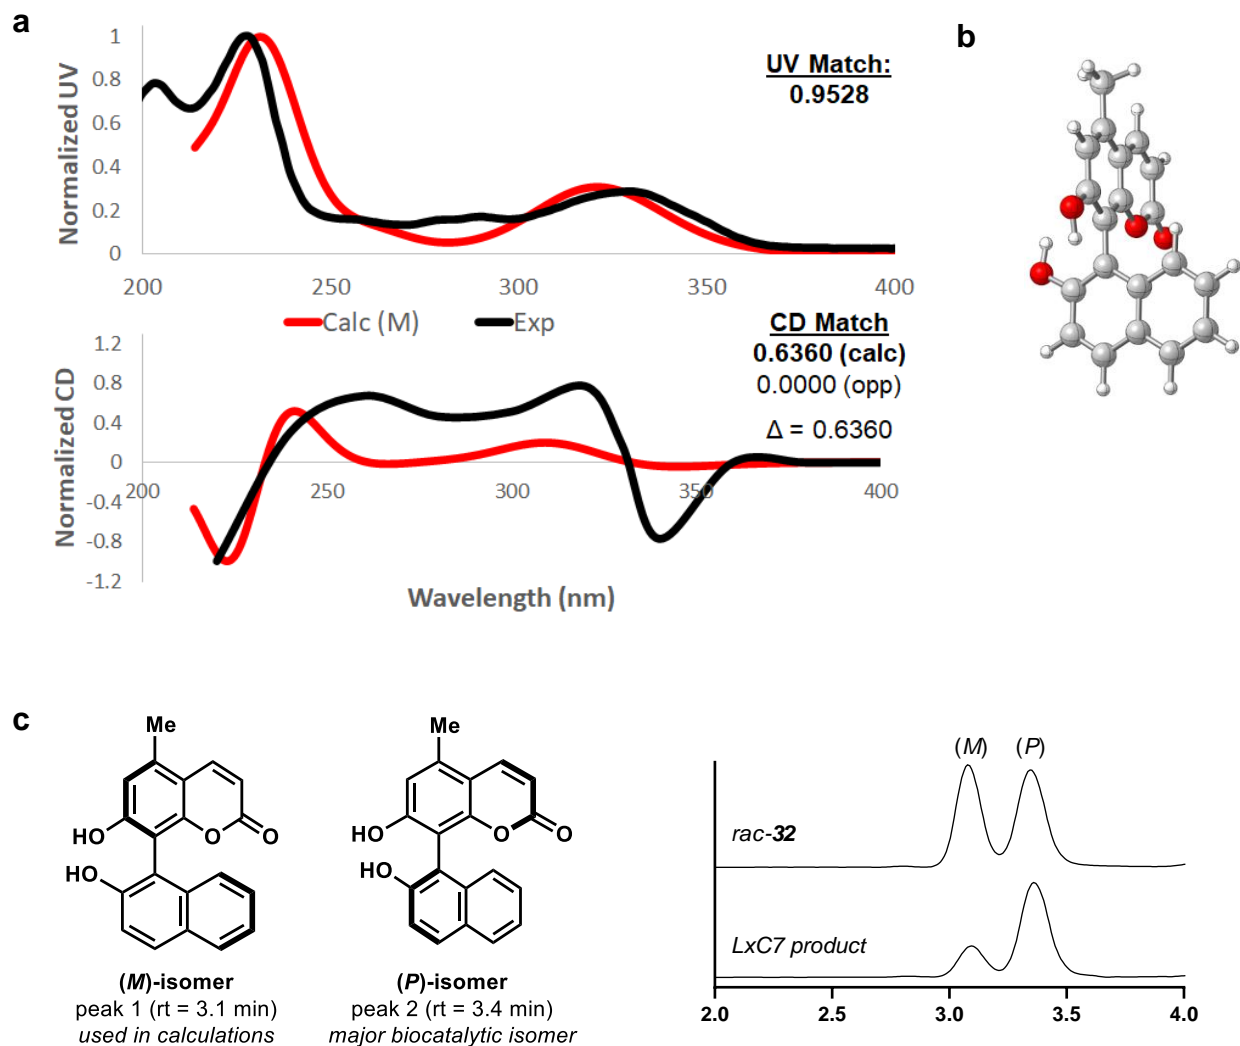

**Supplemental Table S10.** Coordinates and electronic energies for B3LYP/6-31G\*\* conformational minima contributing >2% to the *in vacuo* Boltzmann distribution.

| <u>Conformer 1: -1071.422377 hartrees</u> |         |         |         |   |         |                 |
|-------------------------------------------|---------|---------|---------|---|---------|-----------------|
| 6                                         | 2.0299  | -2.4049 | 0.221   | 8 | -0.4275 | 0.4375 2.9279   |
| 6                                         | 0.7262  | -1.949  | 0.4824  | 6 | 1.9796  | 2.6193 -0.463   |
| 6                                         | 0.3877  | -0.5874 | 0.3831  | 8 | 1.562   | 3.7505 -0.5131  |
| 6                                         | 1.4141  | 0.2949  | 0.0016  | 6 | -2.7807 | -0.7213 -2.6109 |
| 6                                         | 2.7293  | -0.14   | -0.2673 | 6 | 4.4244  | -2.0372 -0.4303 |
| 6                                         | 3.0321  | -1.5234 | -0.1521 | 1 | 2.2282  | -3.4669 0.3167  |
| 8                                         | 1.075   | 1.6095  | -0.0942 | 1 | 4.0371  | 2.9461 -1.0278  |
| 6                                         | 3.3342  | 2.1731  | -0.7428 | 1 | 4.704   | 0.5697 -0.8634  |
| 6                                         | 3.6826  | 0.8678  | -0.6478 | 1 | -1.0432 | -2.4244 0.9689  |
| 8                                         | -0.1927 | -2.8762 | 0.835   | 1 | -2.8455 | 1.1453 3.2309   |
| 6                                         | -2.6506 | 0.7742  | 2.2306  | 1 | -4.6401 | 1.0422 1.5136   |
| 6                                         | -1.3342 | 0.3483  | 1.9196  | 1 | -0.7723 | -0.9897 -1.9288 |
| 6                                         | -1.0117 | -0.1377 | 0.6566  | 1 | -4.8735 | -0.3462 -3.045  |
| 6                                         | -2.0306 | -0.1971 | -0.3531 | 1 | -5.3743 | 0.4953 -0.7699  |
| 6                                         | -3.361  | 0.2312  | -0.0336 | 1 | 0.4362  | 0.1545 2.5899   |
| 6                                         | -3.6316 | 0.7147  | 1.2759  | 1 | -2.5614 | -1.0844 -3.6108 |
| 6                                         | -1.7764 | -0.6712 | -1.6687 | 1 | 4.4718  | -3.1193 -0.2915 |
| 6                                         | -4.0925 | -0.3017 | -2.2922 | 1 | 4.7373  | -1.8187 -1.4574 |
| 6                                         | -4.3711 | 0.1656  | -1.0275 | 1 | 5.1642  | -1.5826 0.2381  |

### VIII. $^1\text{H}$ NMR and $^{13}\text{C}$ NMR spectra of compounds

**Supplemental Figure S87.** Crude  $^1\text{H}$  NMR (600 MHz, acetone- $d_6$ ) from oxidative cross-coupling of **10** and **31** (Supplemental Table S1, Entry 2a).

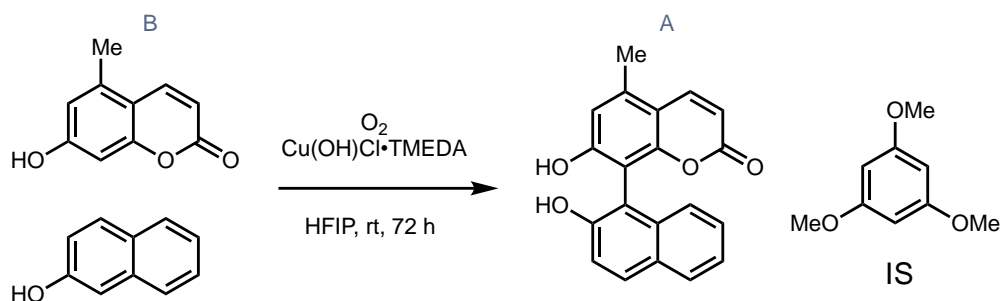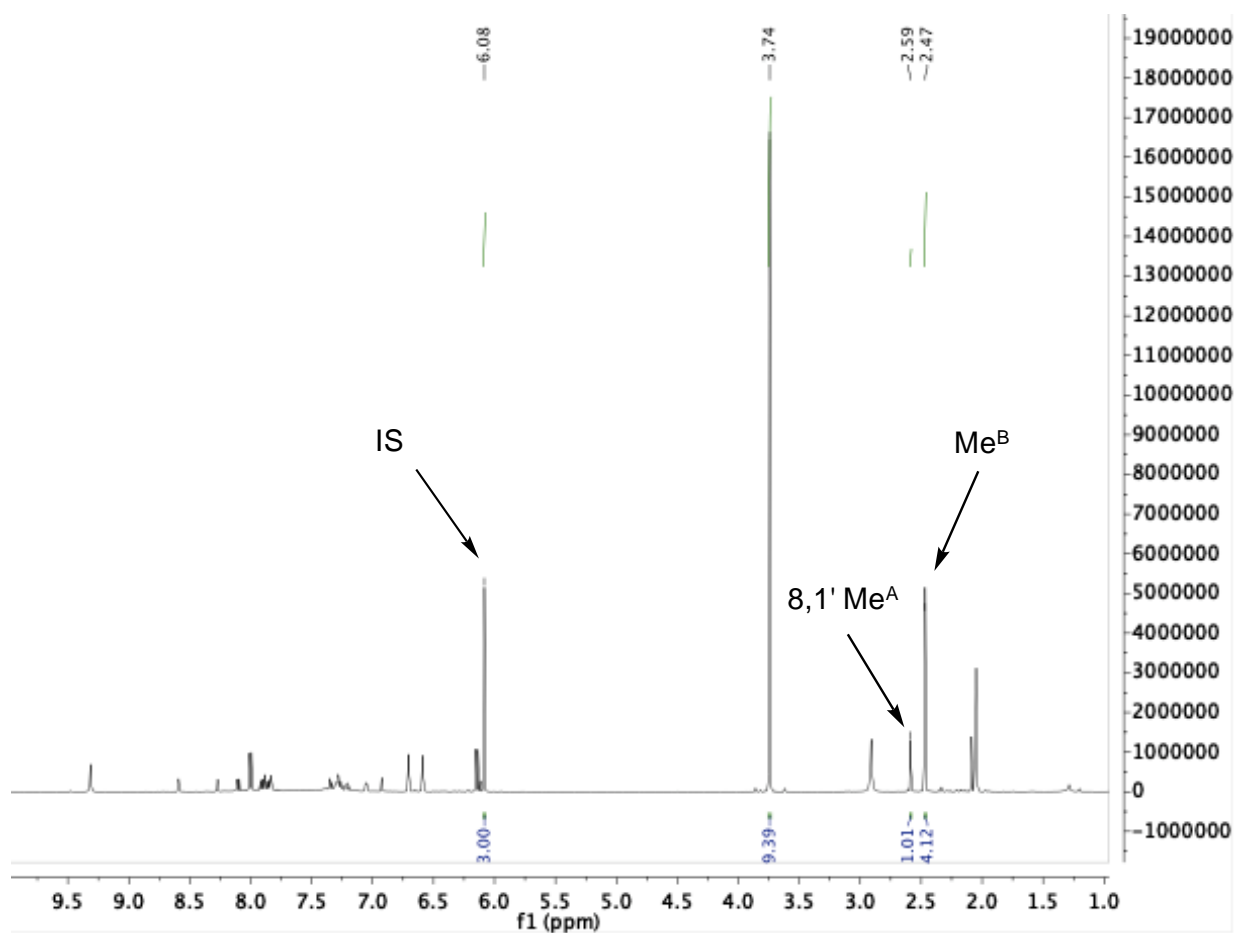

| mg crude | mg sample | mg IS | mmol IS | Molar ratio | mg 8,1' sample | mg 8,1' reaction |
|----------|-----------|-------|---------|-------------|----------------|------------------|
| 111      | 20.5      | 5.0   | 0.029   | 0.336       | 3.2            | 17.3             |



**Supplemental Figure S88.** Crude  $^1\text{H}$  NMR (600 MHz,  $\text{CDCl}_3$ ) from oxidative cross-coupling of **39** and **31** (Supplemental Table S1, Entry 3b).

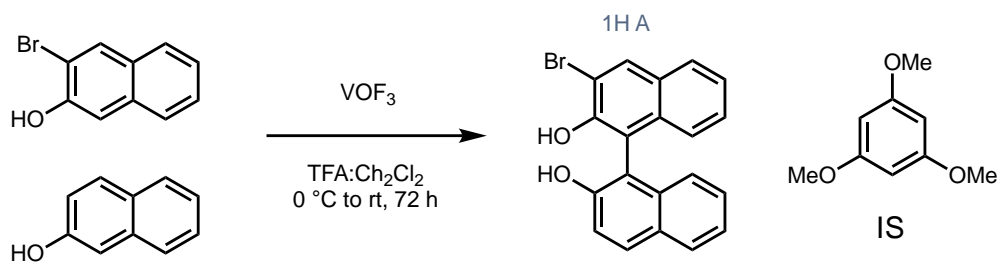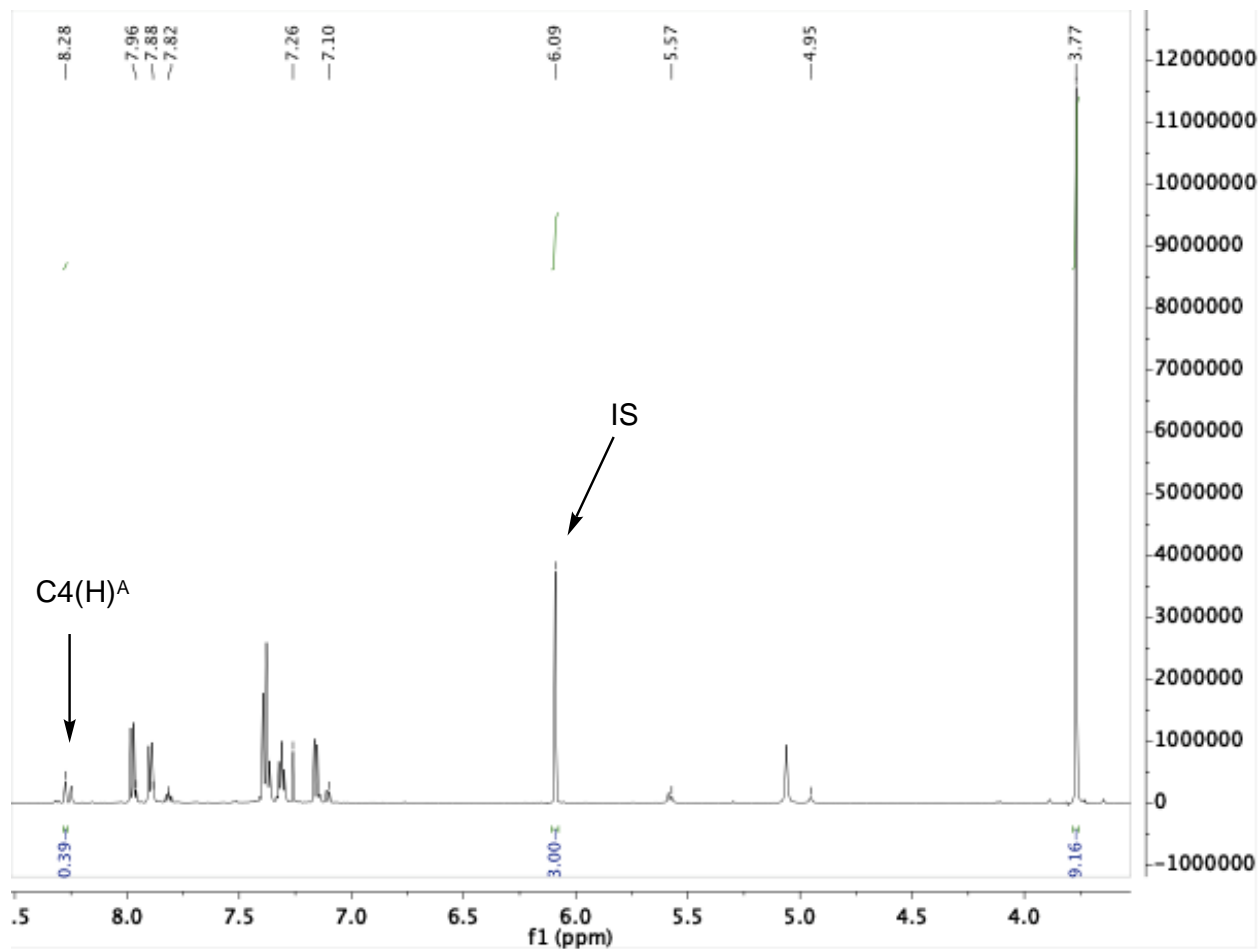

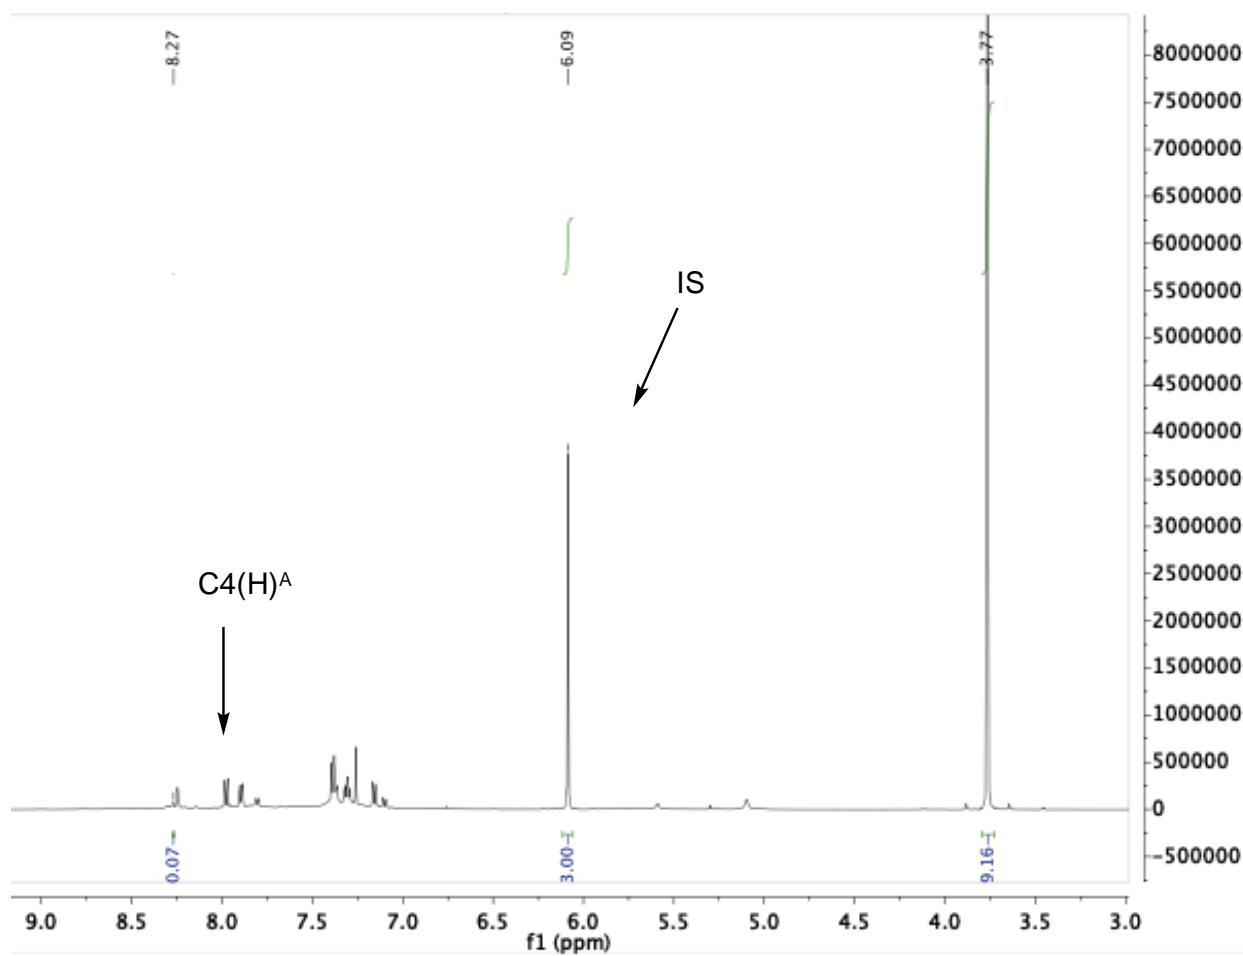

| Fraction | mg fraction | mg IS | mmol IS | Molar ratio | mmol 8,1' | mg 8,1' |
|----------|-------------|-------|---------|-------------|-----------|---------|
| 2        | 28.6        | 5.60  | 0.033   | 0.39        | 0.013     | 4.7     |
| 3-5      | 33.4        | 7.50  | 0.045   | 0.07        | 0.003     | 1.1     |

**Supplemental Figure S89.** Crude  $^1\text{H}$  NMR (600 MHz,  $\text{CDCl}_3$ ) from oxidative cross-coupling of **39** and **31** (Supplemental Table S1, Entry 3c).

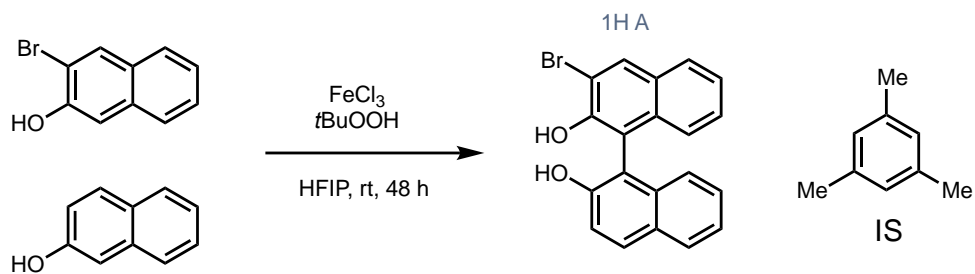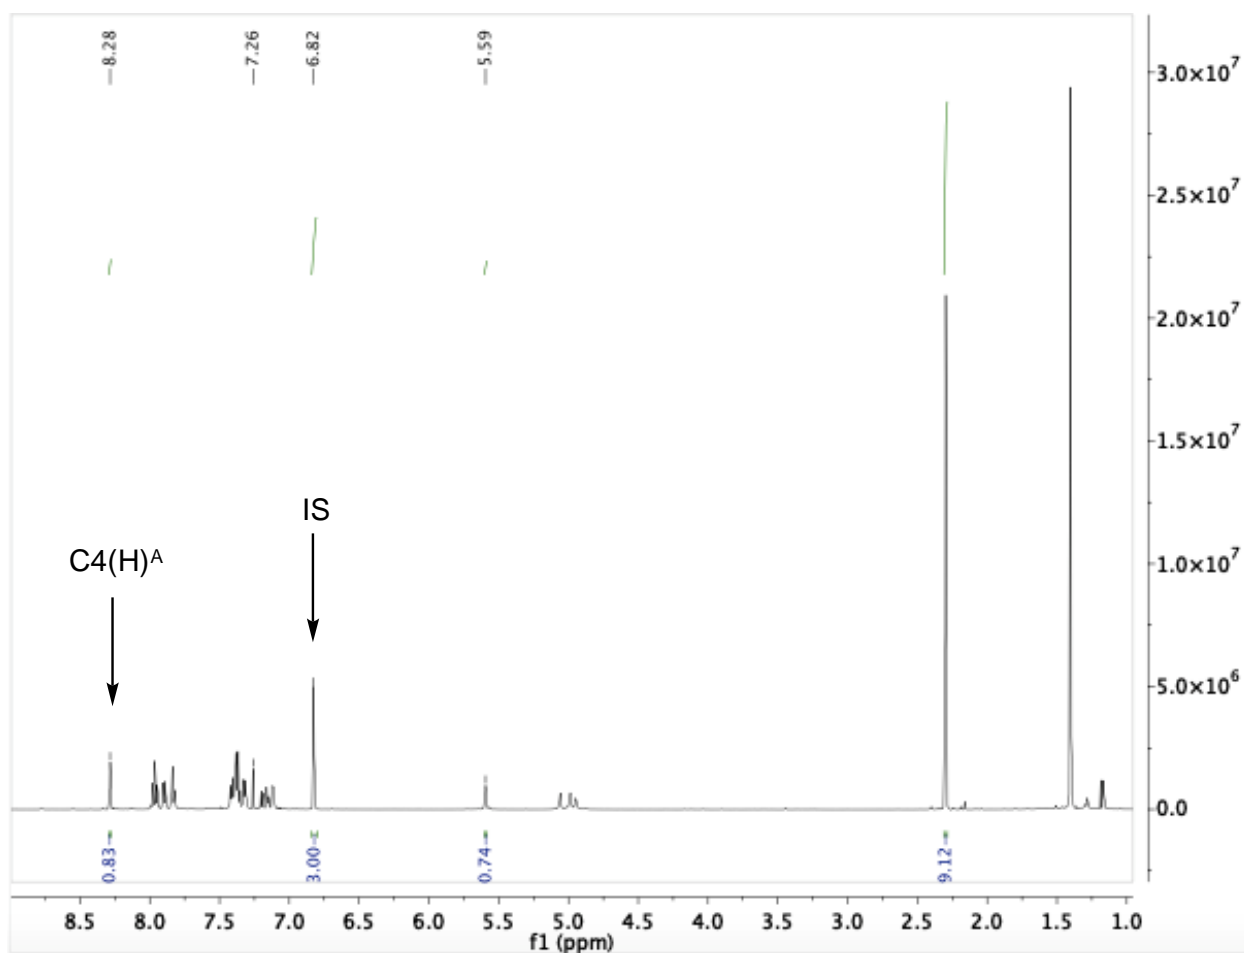

| fractions | mg sample | mg IS<br>(97% purity) | mmol IS | Molar ratio | mmol 8,1' | mg 8,1' |
|-----------|-----------|-----------------------|---------|-------------|-----------|---------|
| 4 & 5     | 36.2      | 5.0                   | 0.0404  | 0.83        | 0.0335    | 17.3    |

**Supplemental Figure S90.** Crude  $^1\text{H}$  NMR (600 MHz, acetone- $d_6$ ) from preparative-scale oxidative cross-coupling of **4** and **18** (1:10 ratio).

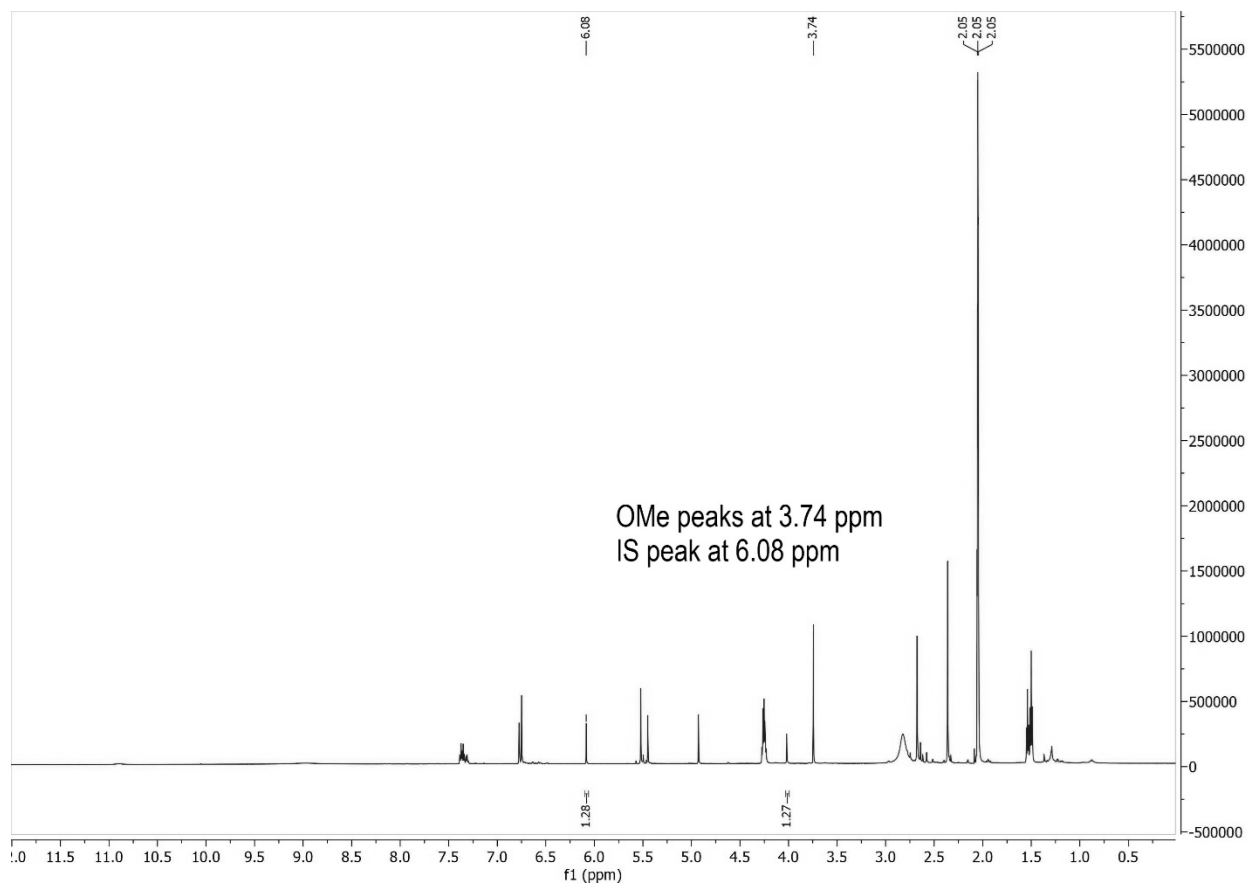

| mg crude | mg sample | mg IS | mmol IS | Molar ratio (IS:OMe) | mmol CC | mg CC product |
|----------|-----------|-------|---------|----------------------|---------|---------------|
| 110      | 4.0       | 0.168 | 0.001   | 1:1                  | 0.0275  | 11.67         |

S1: <sup>1</sup>H NMR (400 MHz, DMSO-*d*<sub>6</sub>)

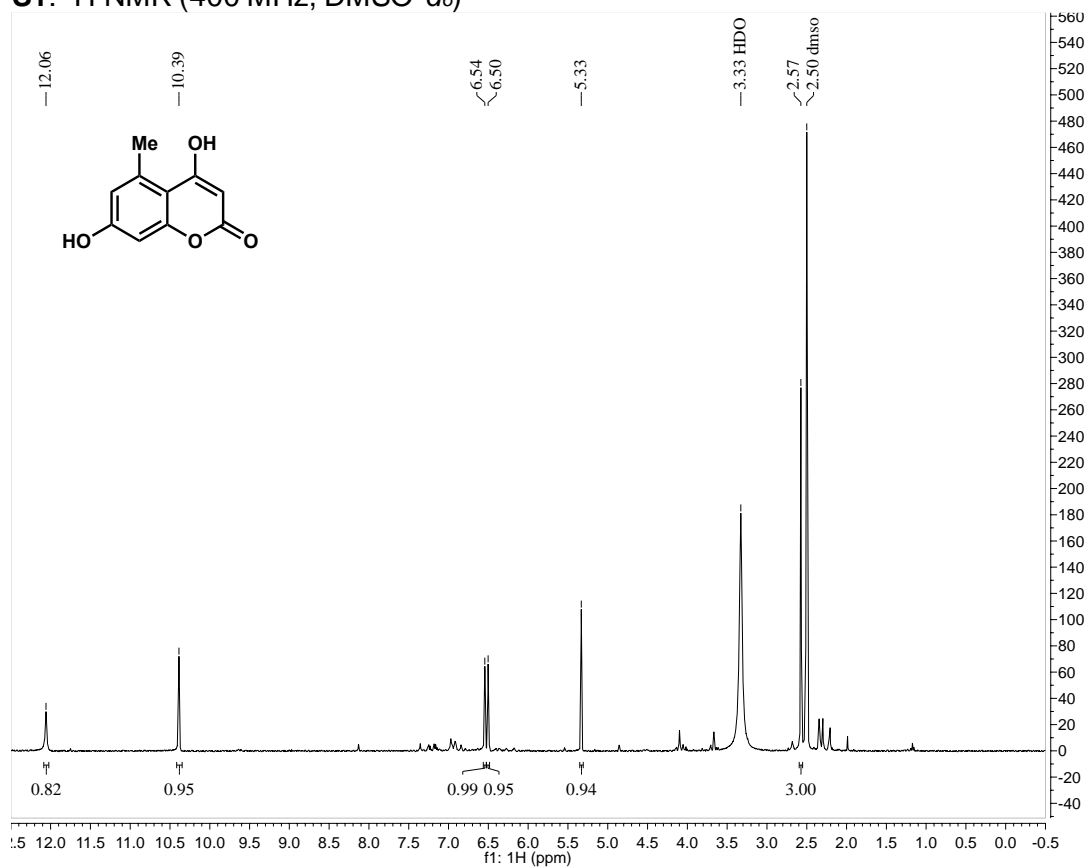

S1: <sup>13</sup>C NMR (150 MHz, DMSO-*d*<sub>6</sub>)

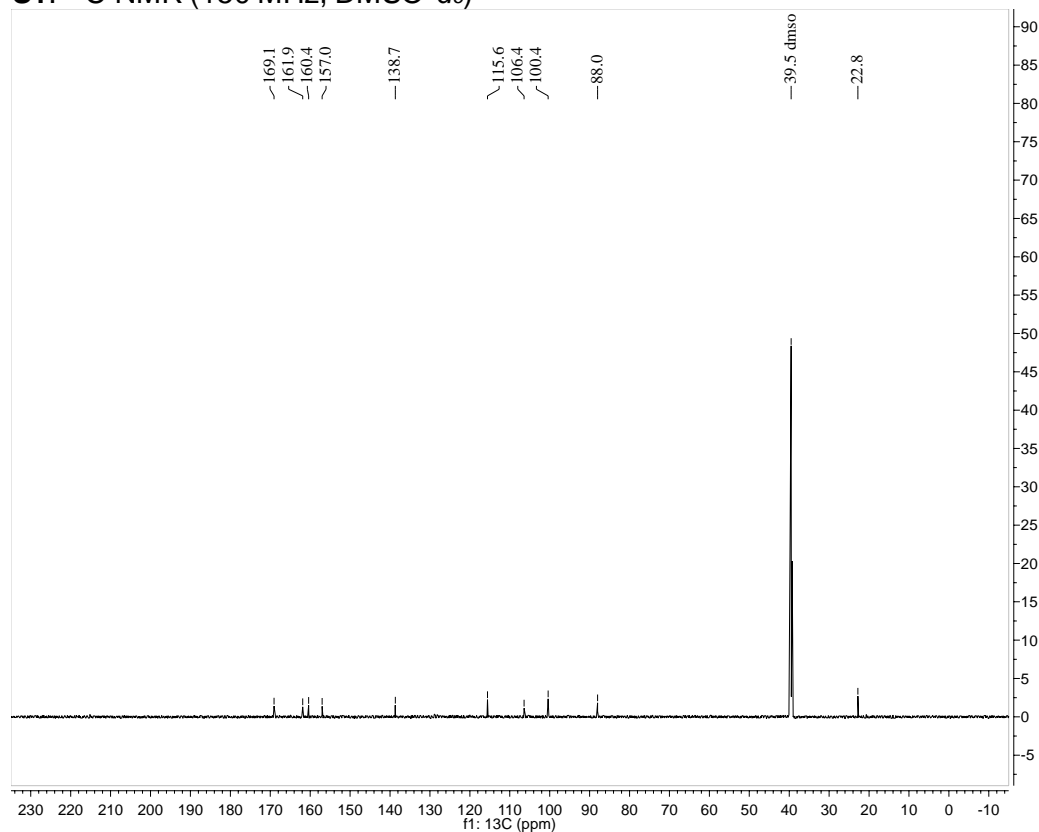

4: <sup>1</sup>H NMR (400 MHz, DMSO-d<sub>6</sub>)

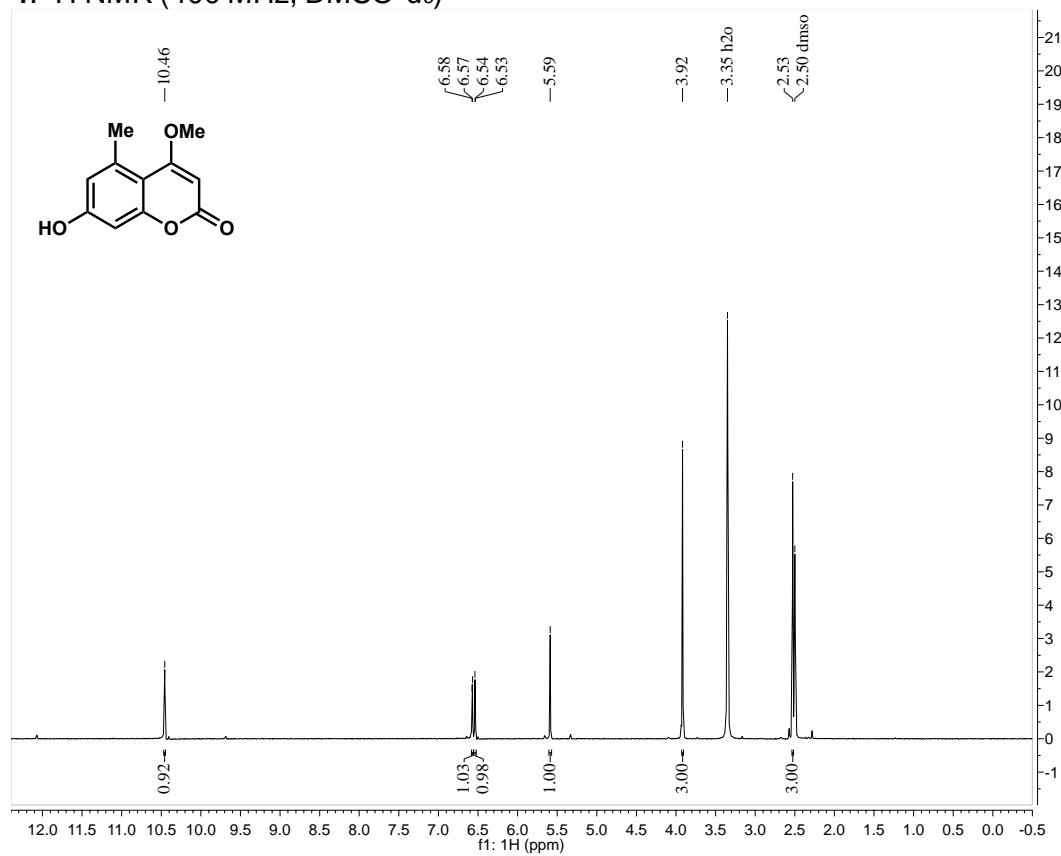

9: <sup>1</sup>H NMR (600 MHz, DMSO-d<sub>6</sub>)

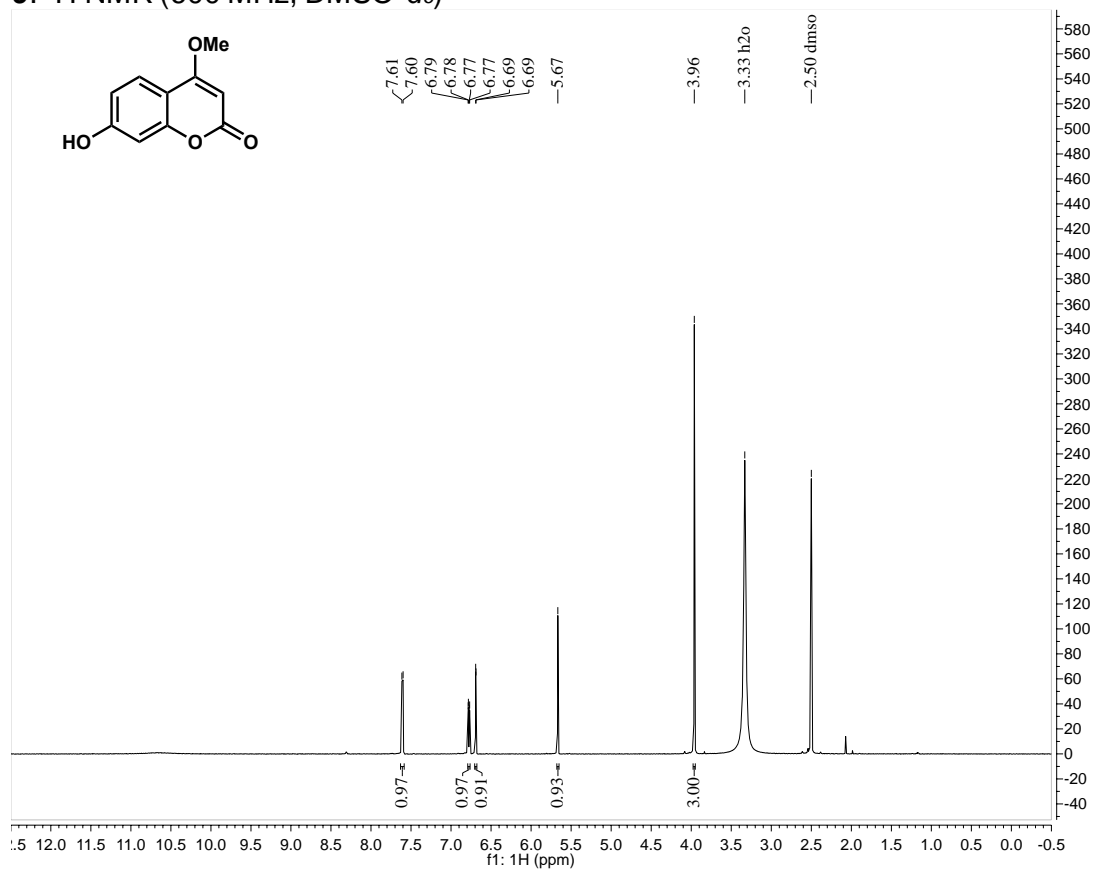

10: <sup>1</sup>H NMR (400 MHz, DMSO-d<sub>6</sub>)

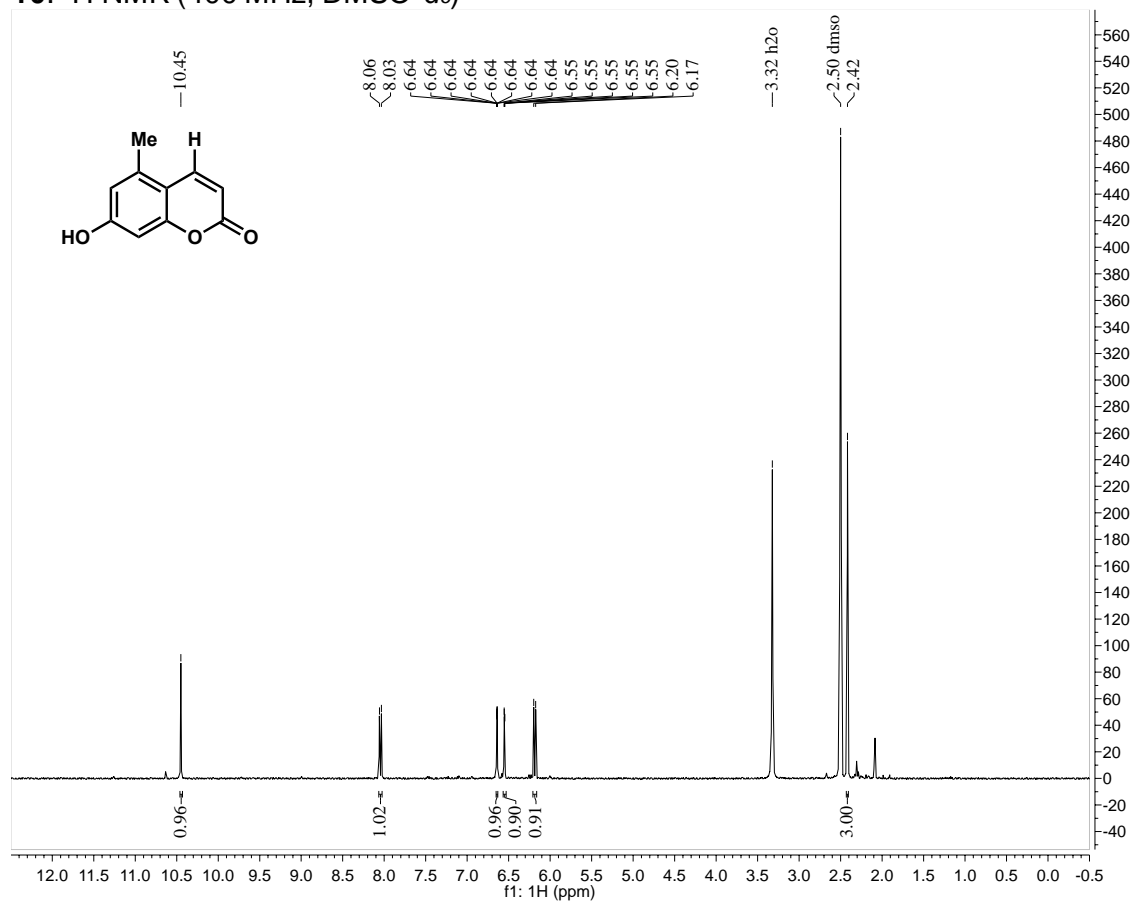



S2: <sup>1</sup>H NMR (600 MHz, DMSO-*d*<sub>6</sub>)

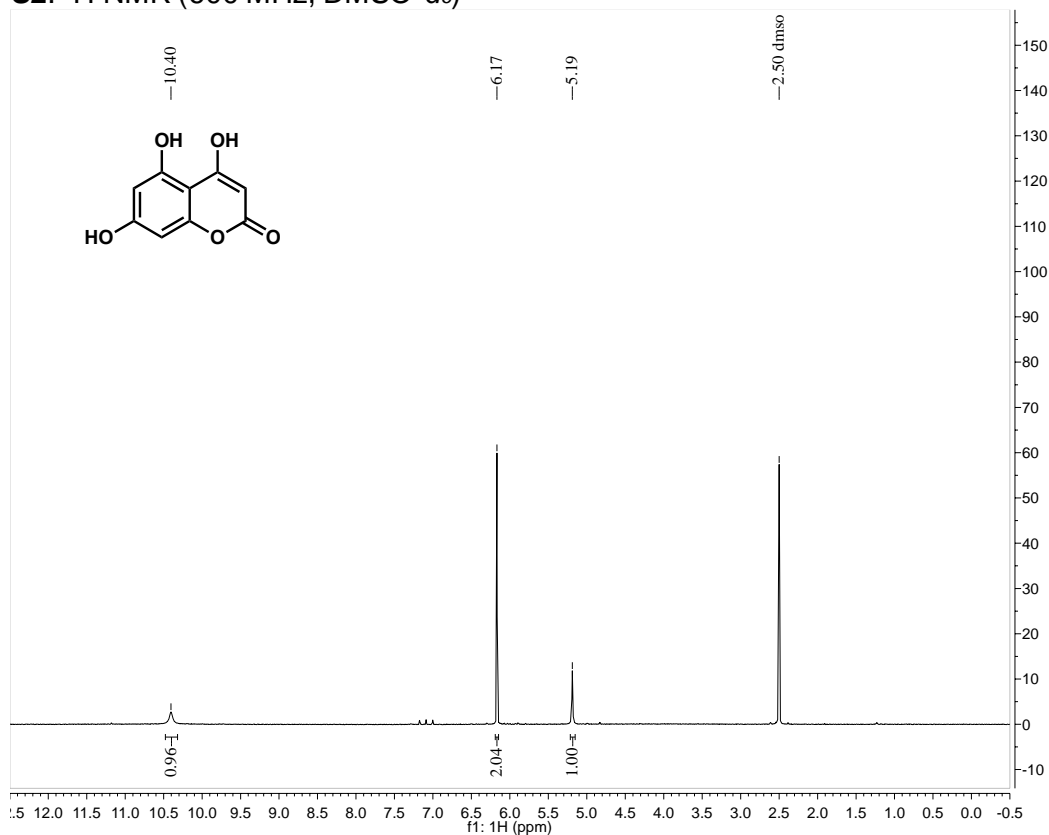

S2: <sup>13</sup>C NMR (150 MHz, DMSO-*d*<sub>6</sub>)

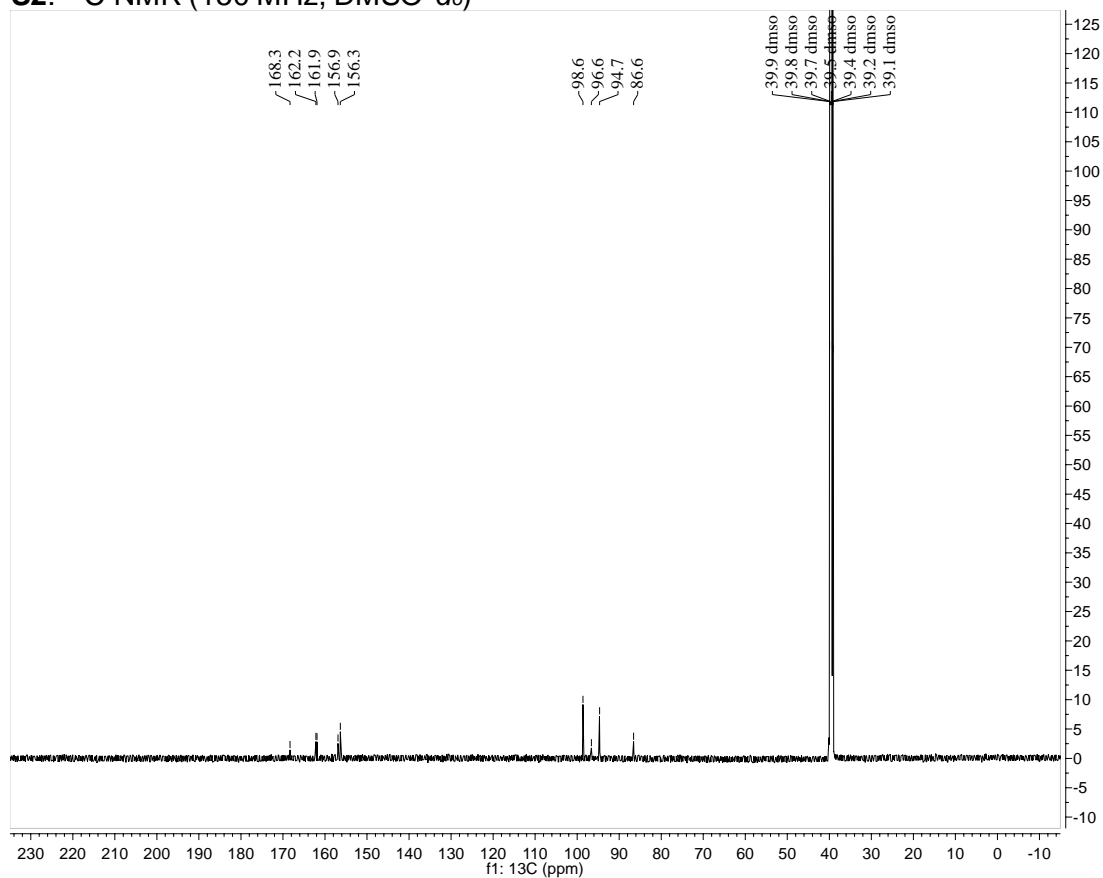

13: <sup>1</sup>H NMR (600 MHz, DMSO-*d*<sub>6</sub>)

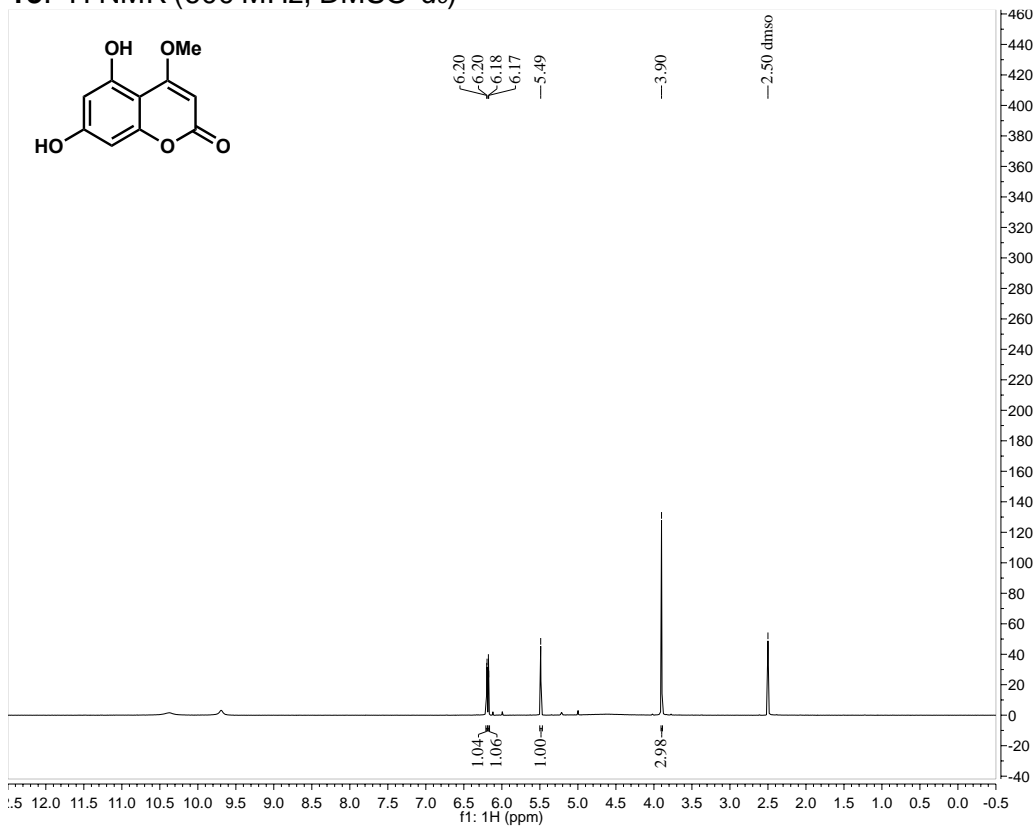

13: <sup>13</sup>C NMR (150 MHz, DMSO-*d*<sub>6</sub>)

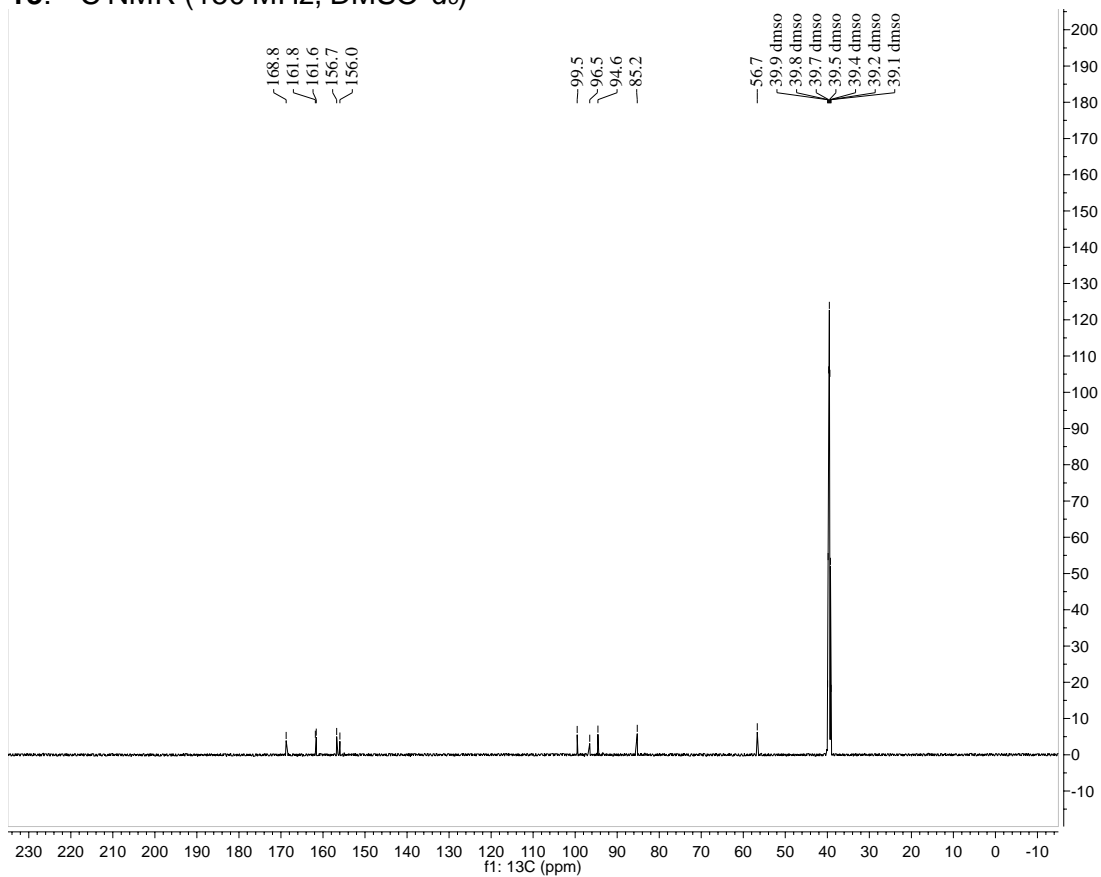

S3:  $^1\text{H}$  NMR (400 MHz,  $\text{CD}_3\text{OD}$ )

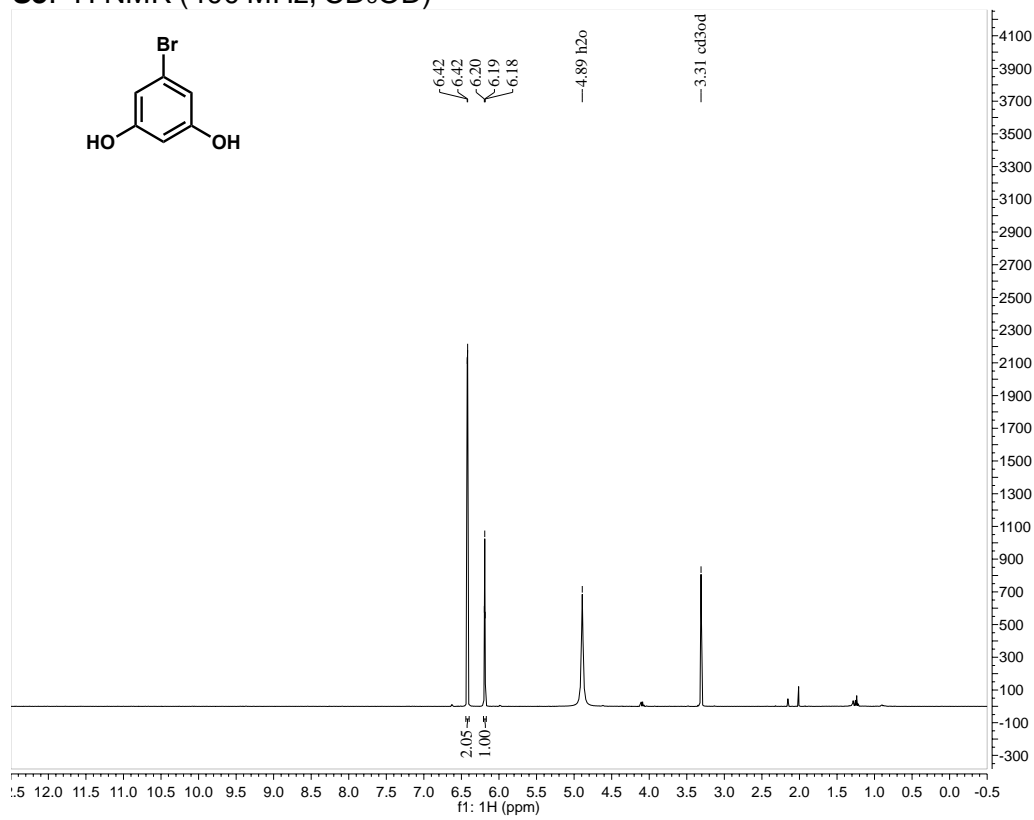

14: <sup>1</sup>H NMR (600 MHz, DMSO-d<sub>6</sub>)

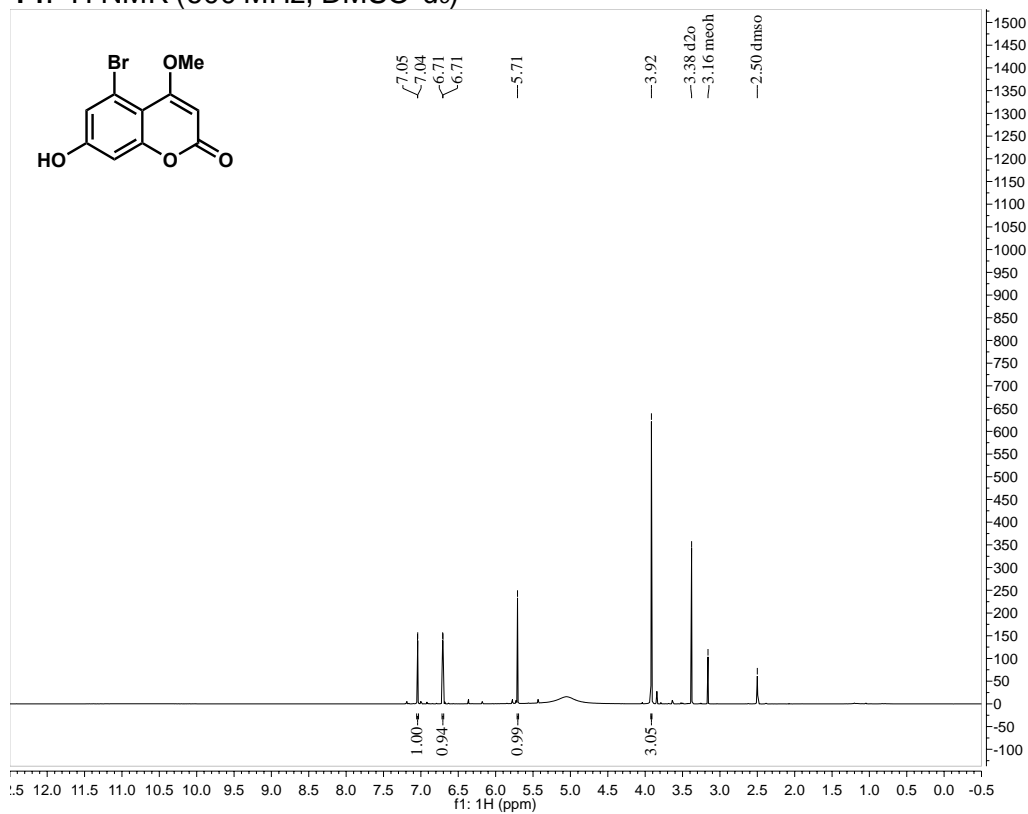

14: <sup>13</sup>C NMR (150 MHz, DMSO-d<sub>6</sub>)

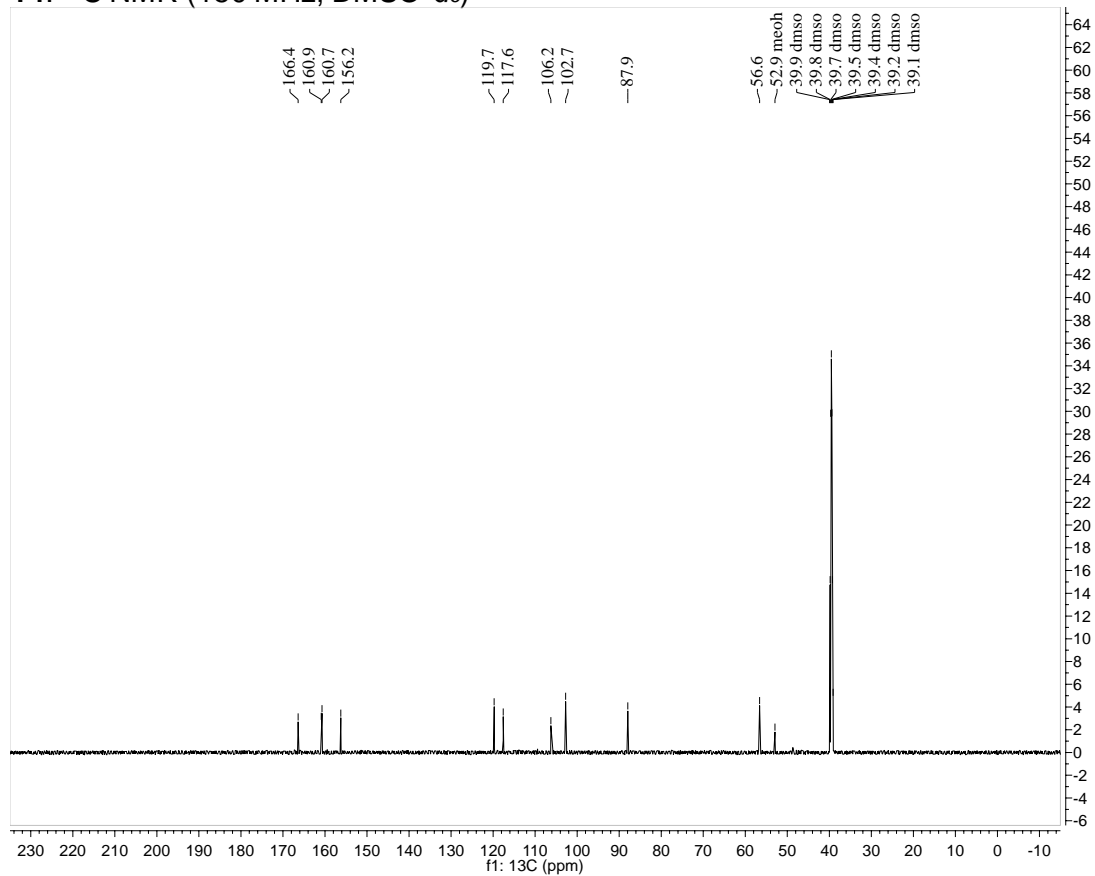

S4:  $^1\text{H}$  NMR (400 MHz, acetone- $d_6$ )

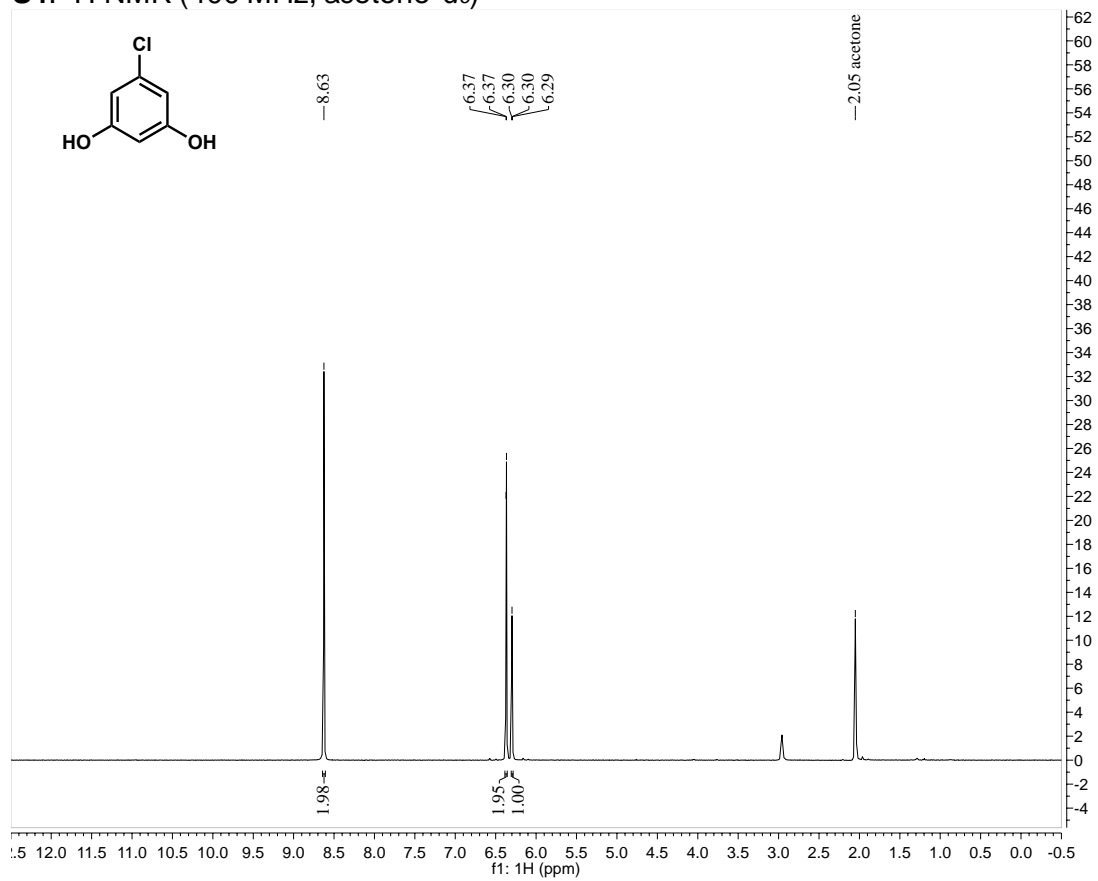

S5: <sup>1</sup>H NMR (600 MHz, acetone-*d*<sub>6</sub>)

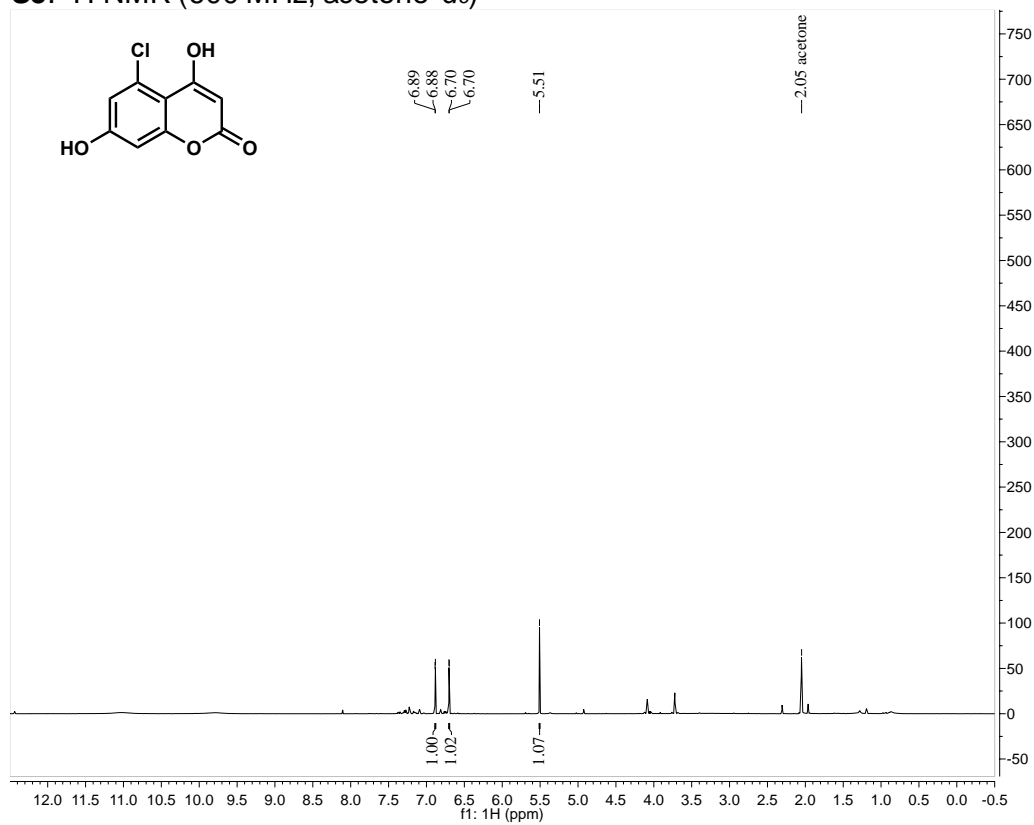

S5: <sup>13</sup>C NMR (150 MHz, acetone-*d*<sub>6</sub>)

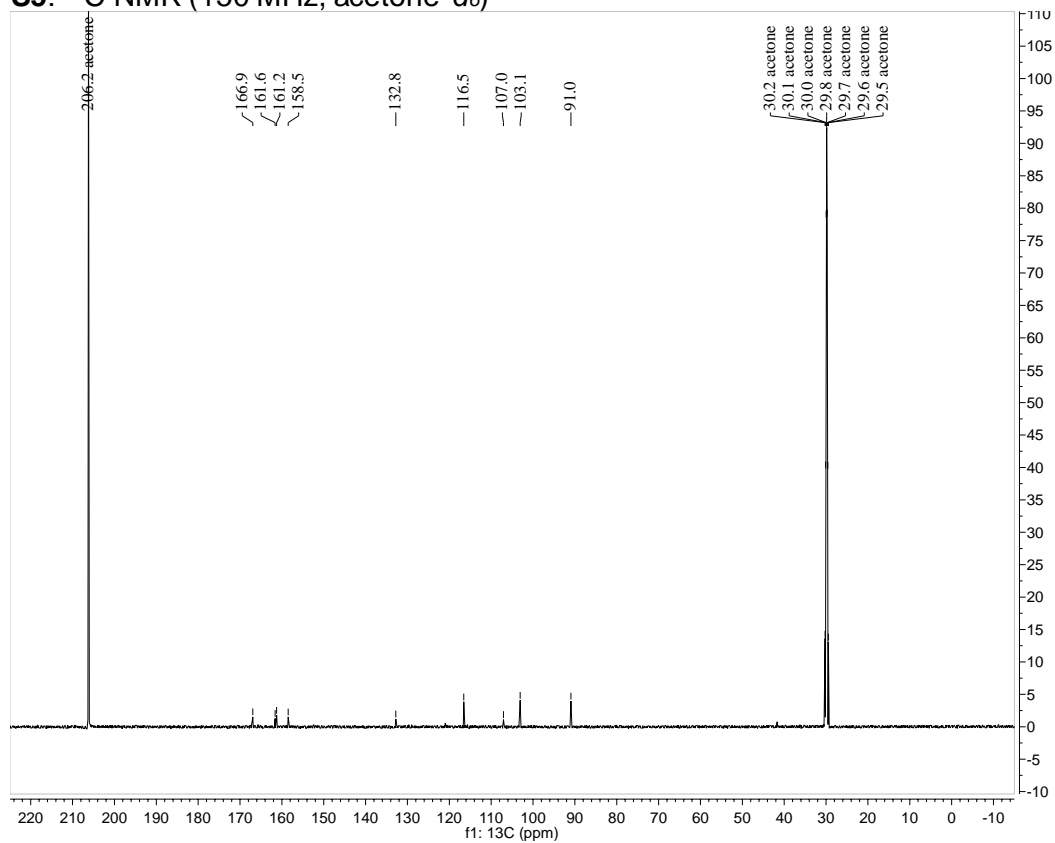

15: <sup>1</sup>H NMR (600 MHz, DMSO-*d*<sub>6</sub>)

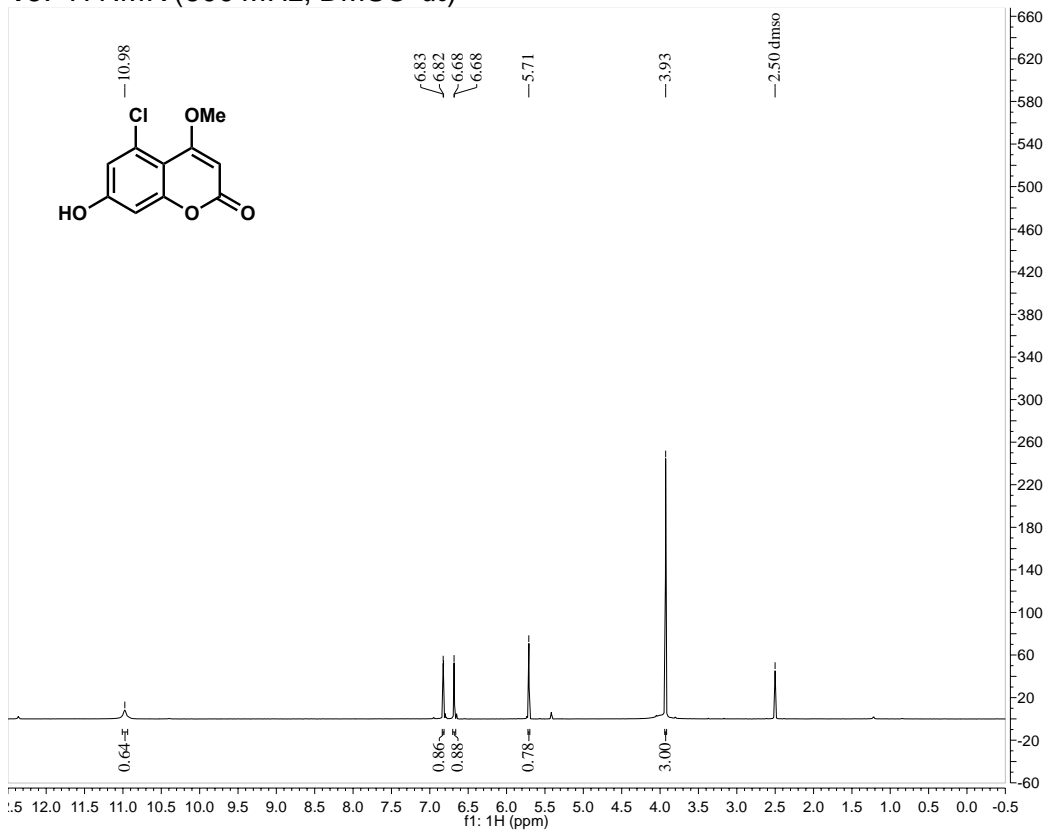

15: <sup>13</sup>C NMR (150 MHz, DMSO-*d*<sub>6</sub>)

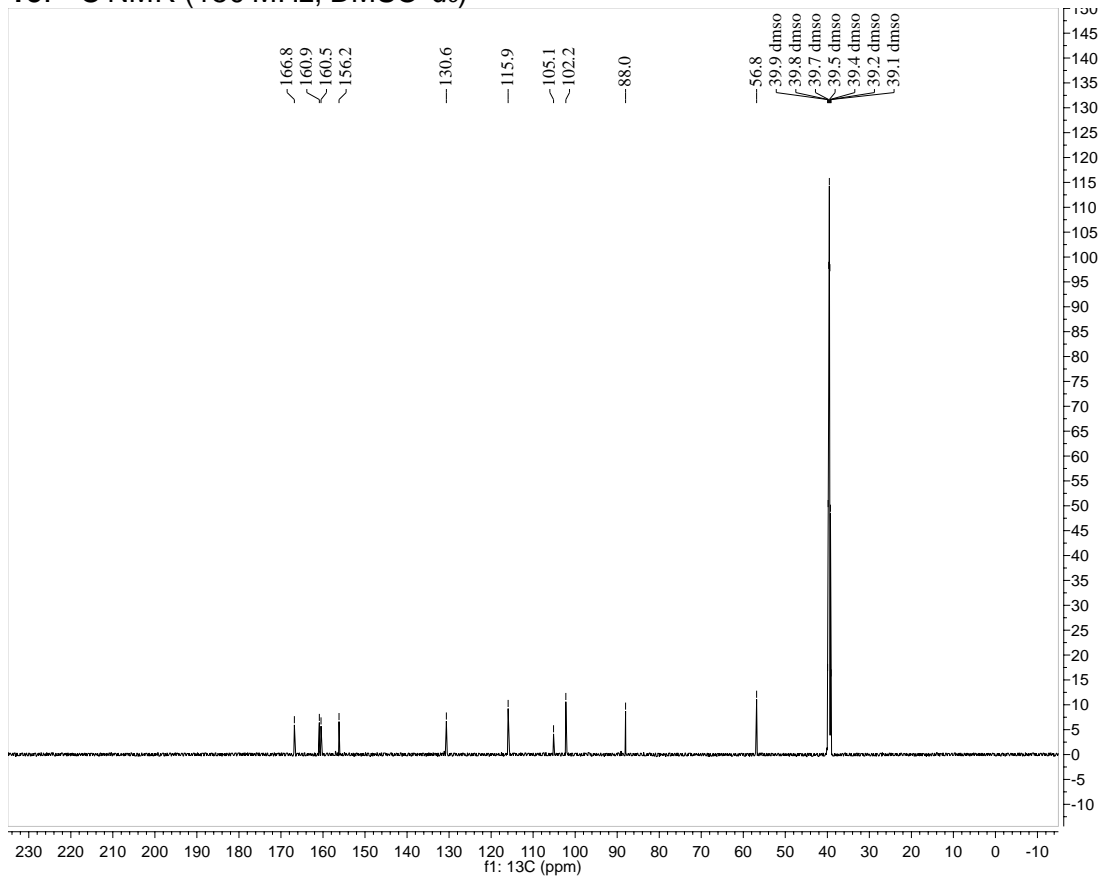

16: <sup>1</sup>H NMR (600 MHz, CD<sub>3</sub>OD)

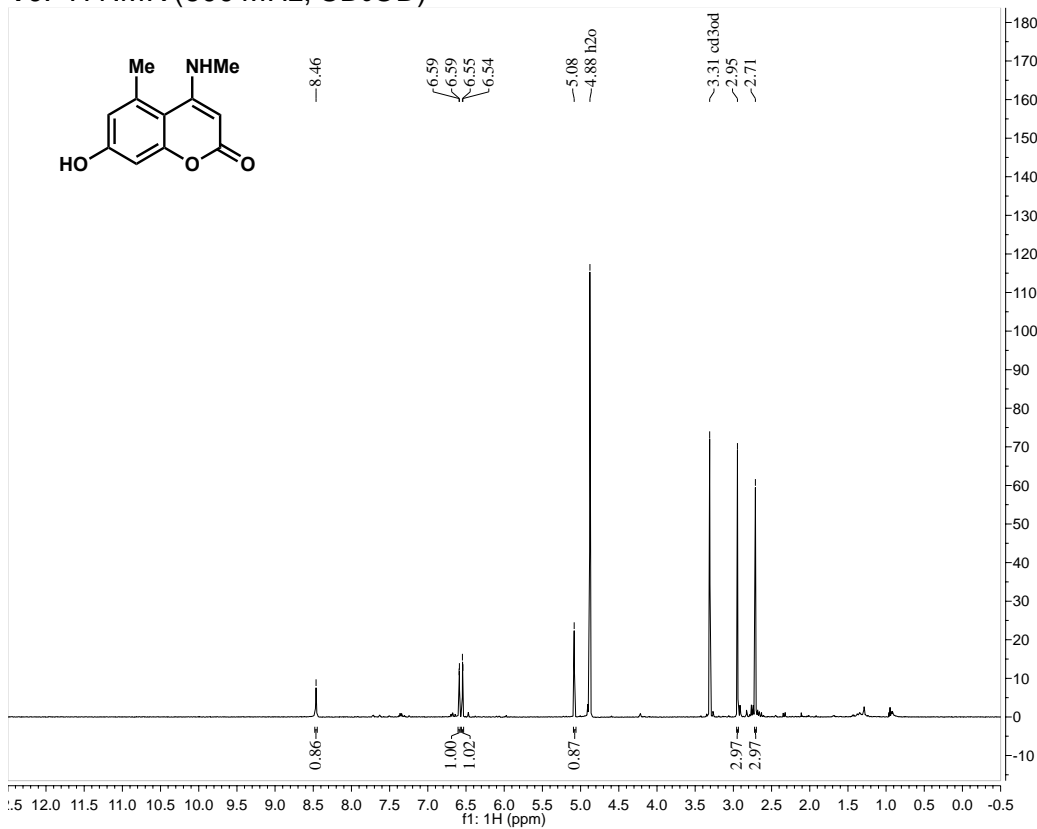

16: <sup>13</sup>C NMR (150 MHz, CD<sub>3</sub>OD)

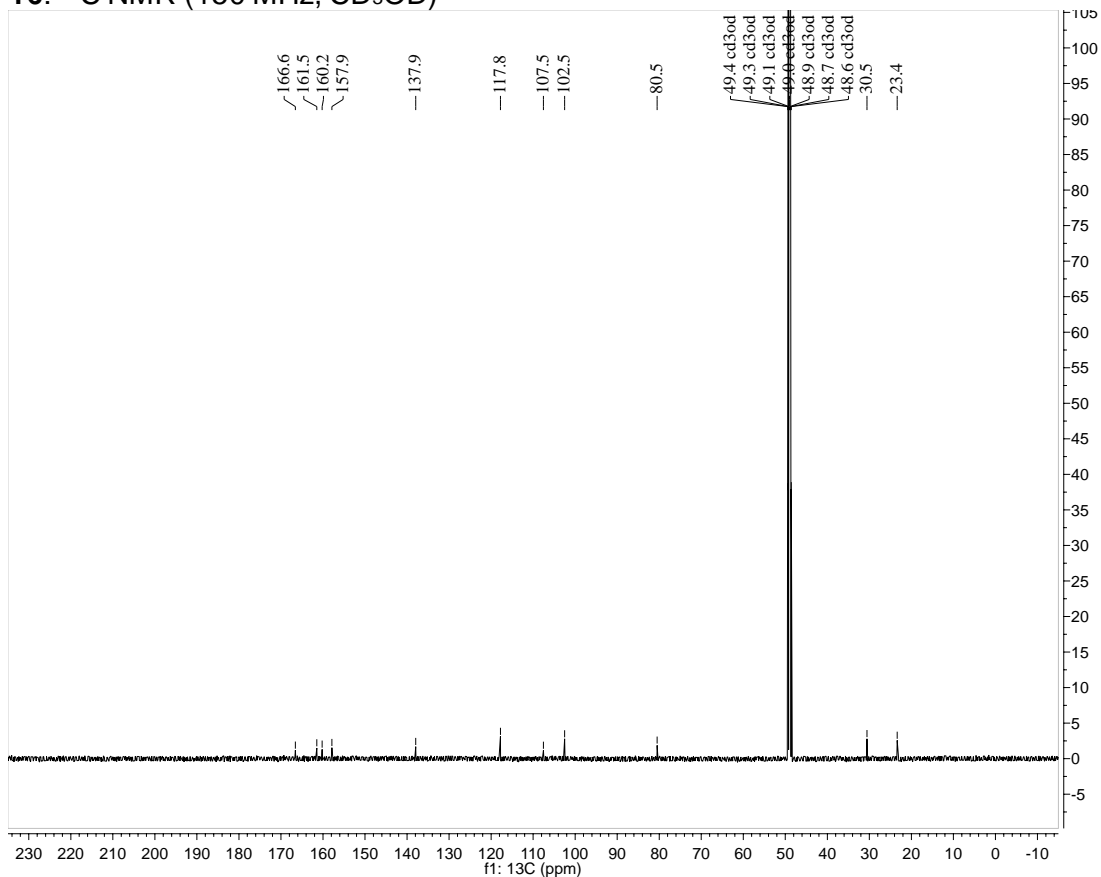



S6:  $^1\text{H}$  NMR (400 MHz, acetone- $d_6$ )

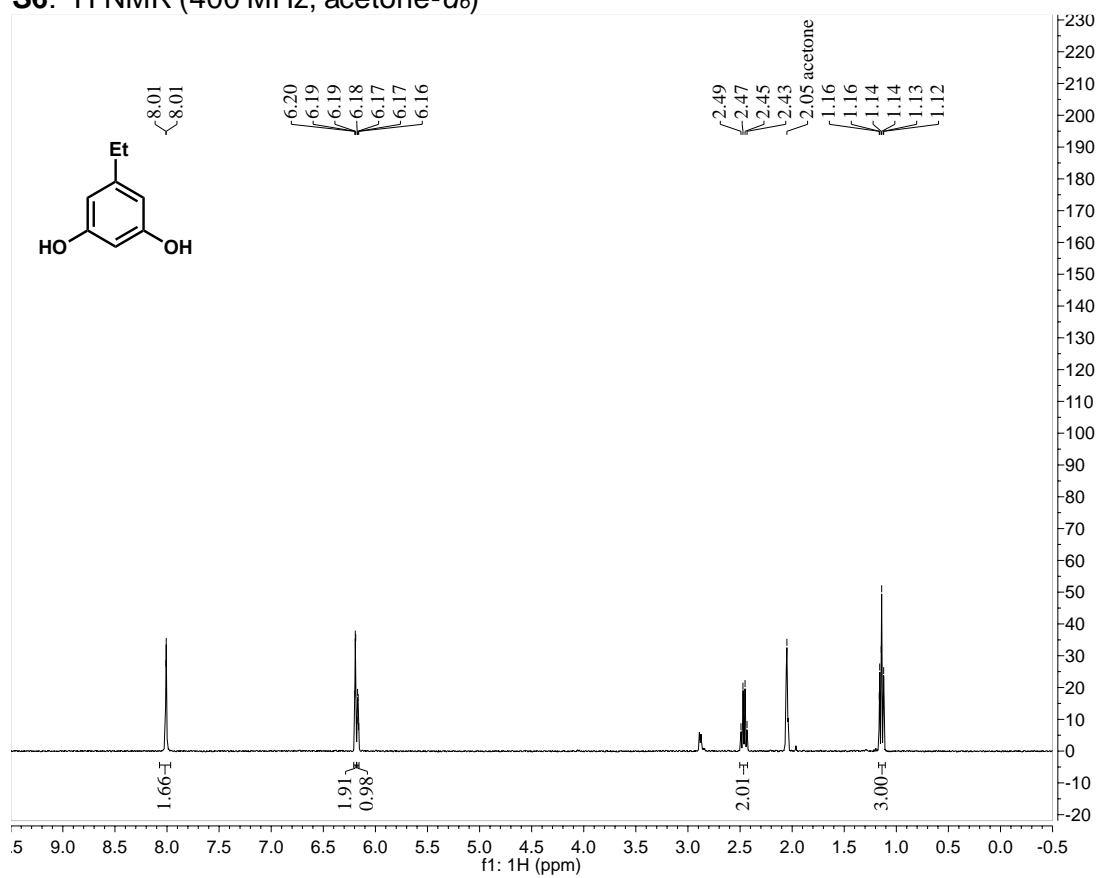

S7: <sup>1</sup>H NMR (600 MHz, DMSO-d<sub>6</sub>)

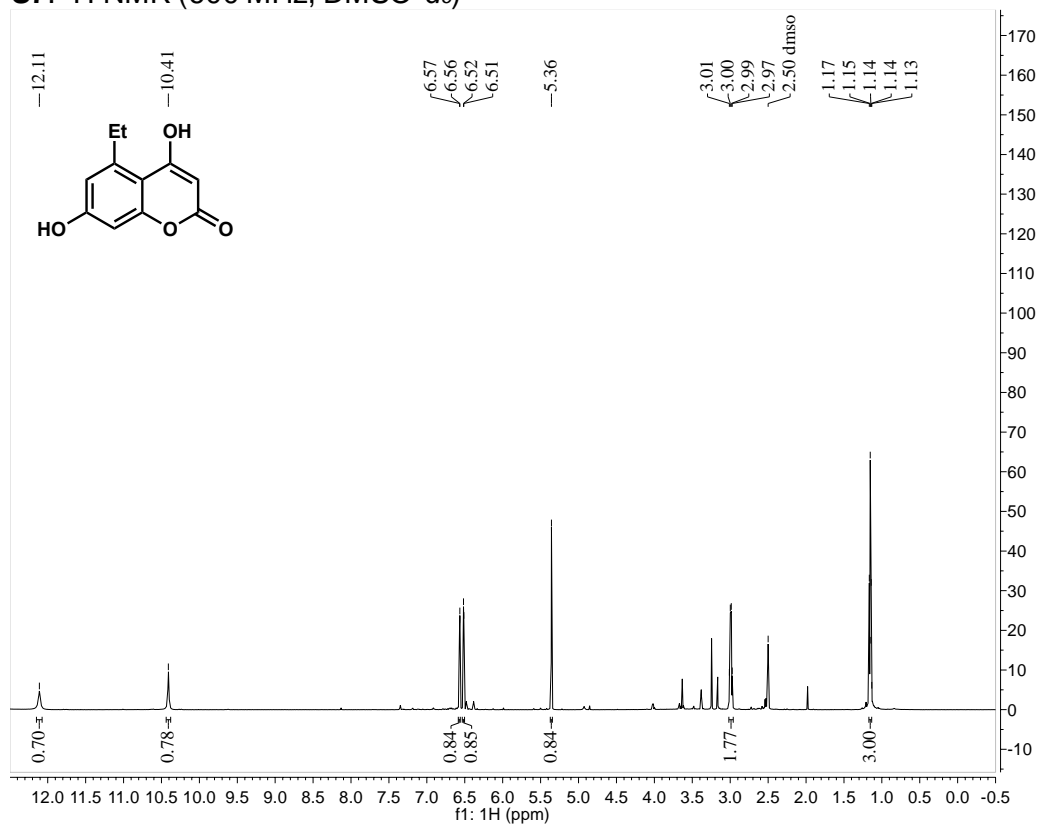

S7: <sup>13</sup>C NMR (150 MHz, DMSO-d<sub>6</sub>)

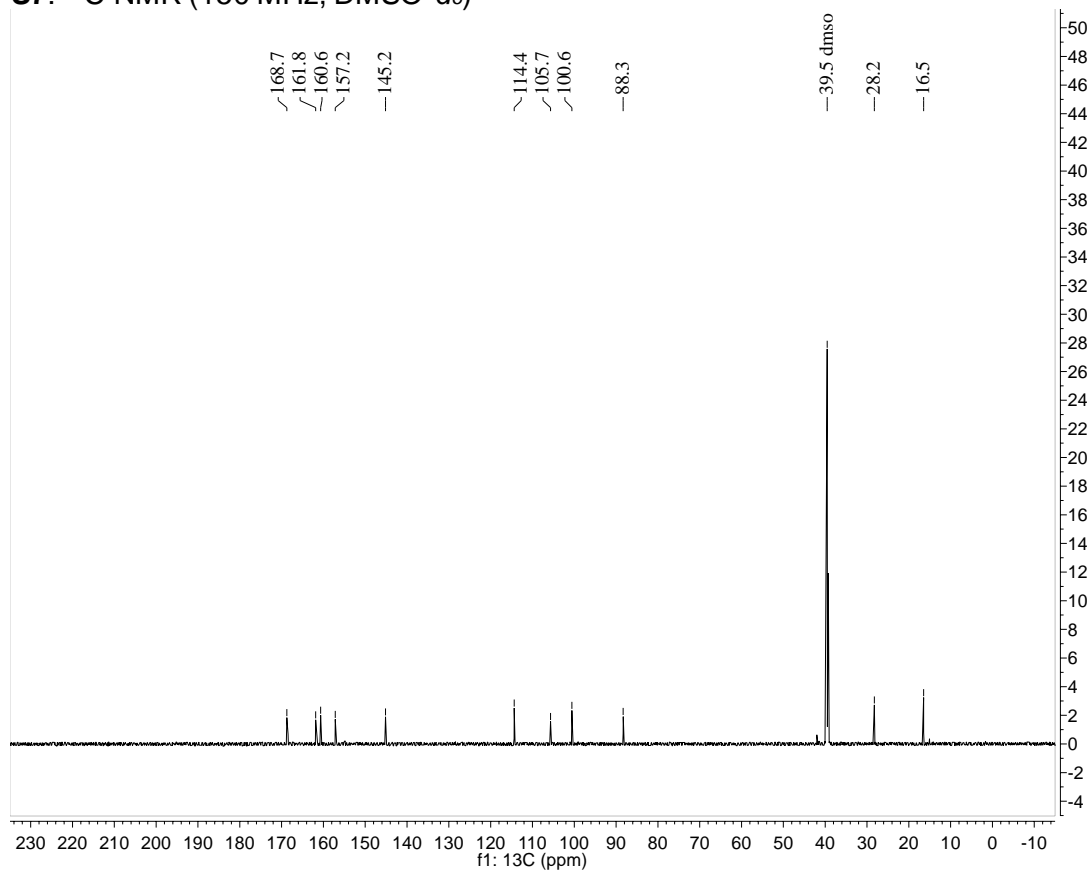

17: <sup>1</sup>H NMR (600 MHz, DMSO-*d*<sub>6</sub>)

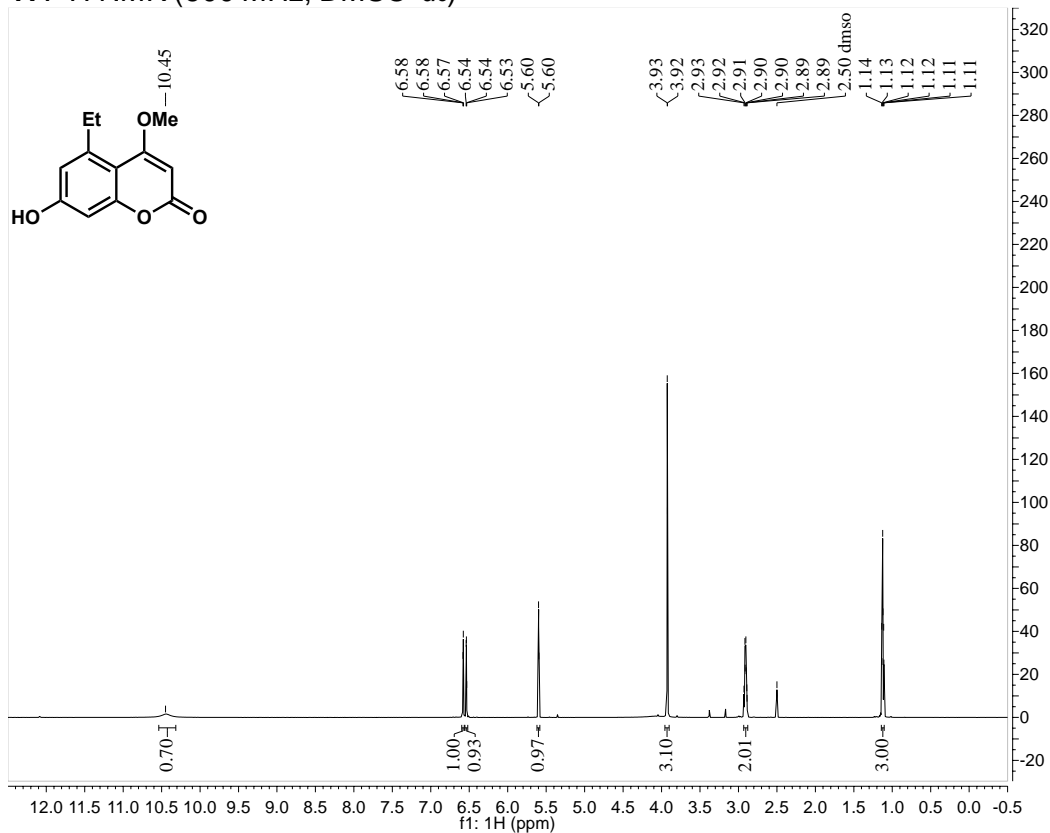

17: <sup>13</sup>C NMR (150 MHz, DMSO-*d*<sub>6</sub>)

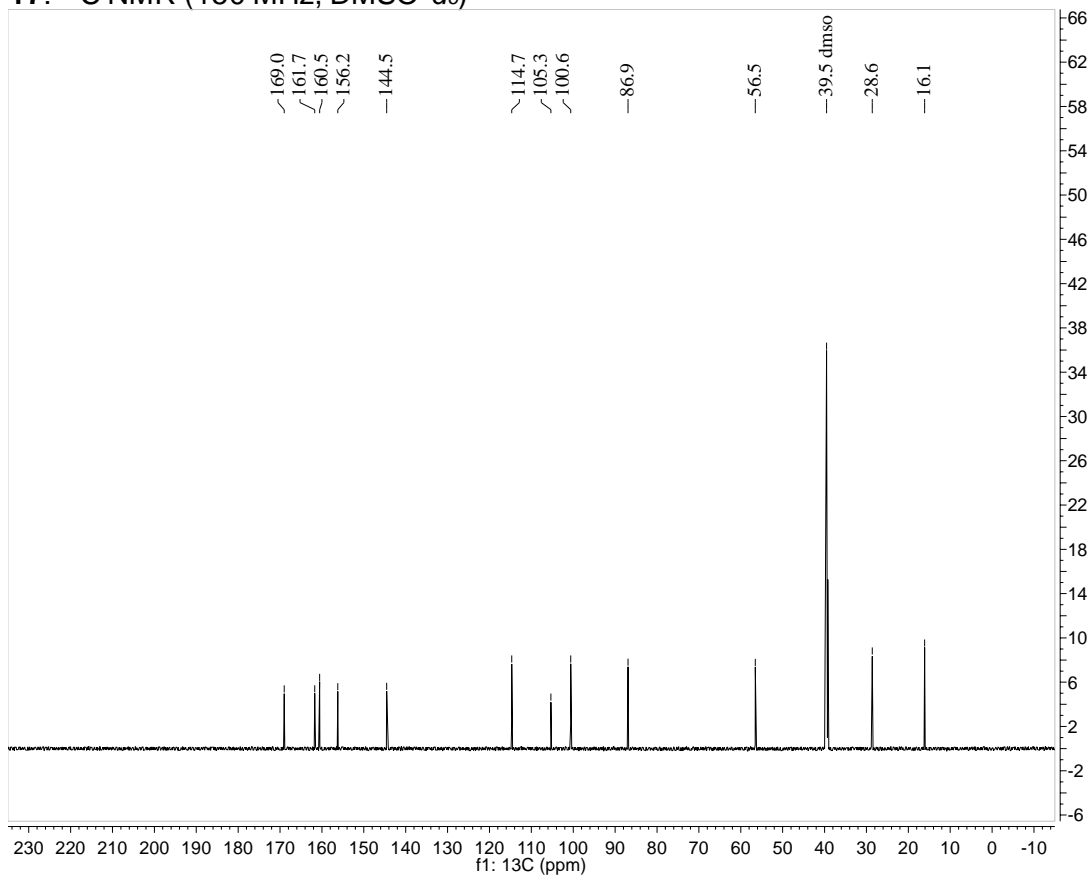

18: <sup>1</sup>H NMR (600 MHz, DMSO-*d*<sub>6</sub>)

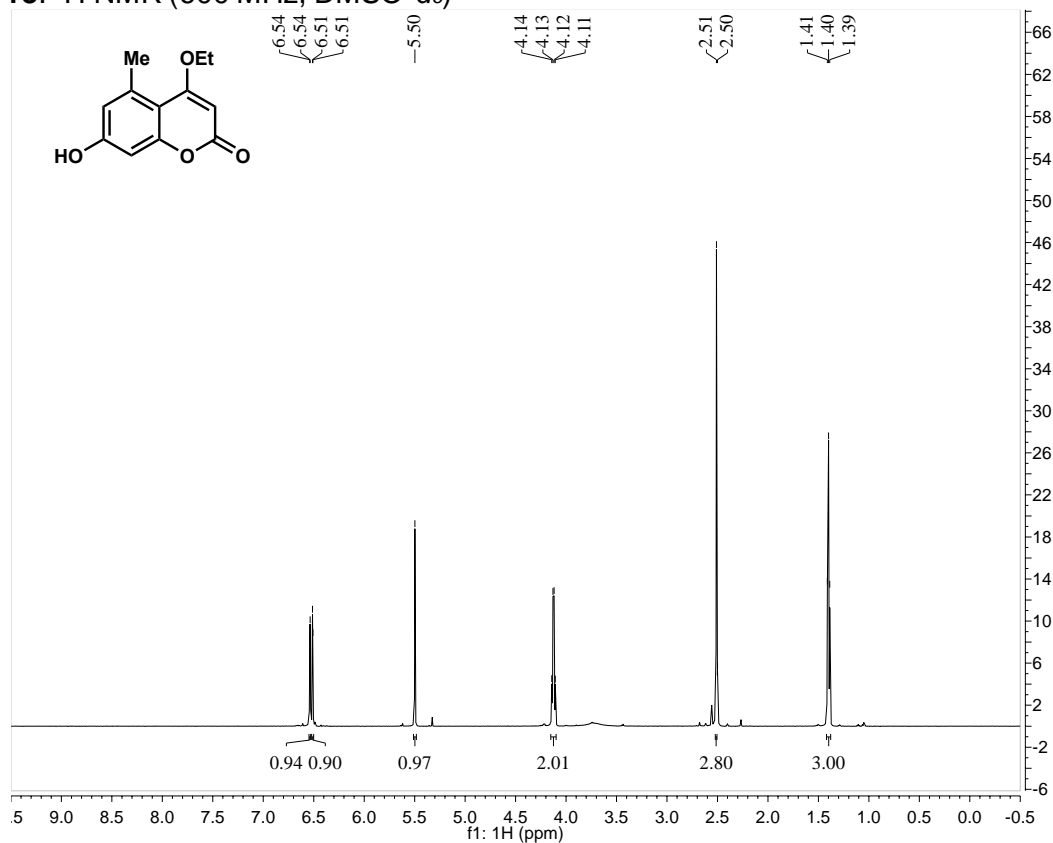

18: <sup>13</sup>C NMR (150 MHz, DMSO-*d*<sub>6</sub>)

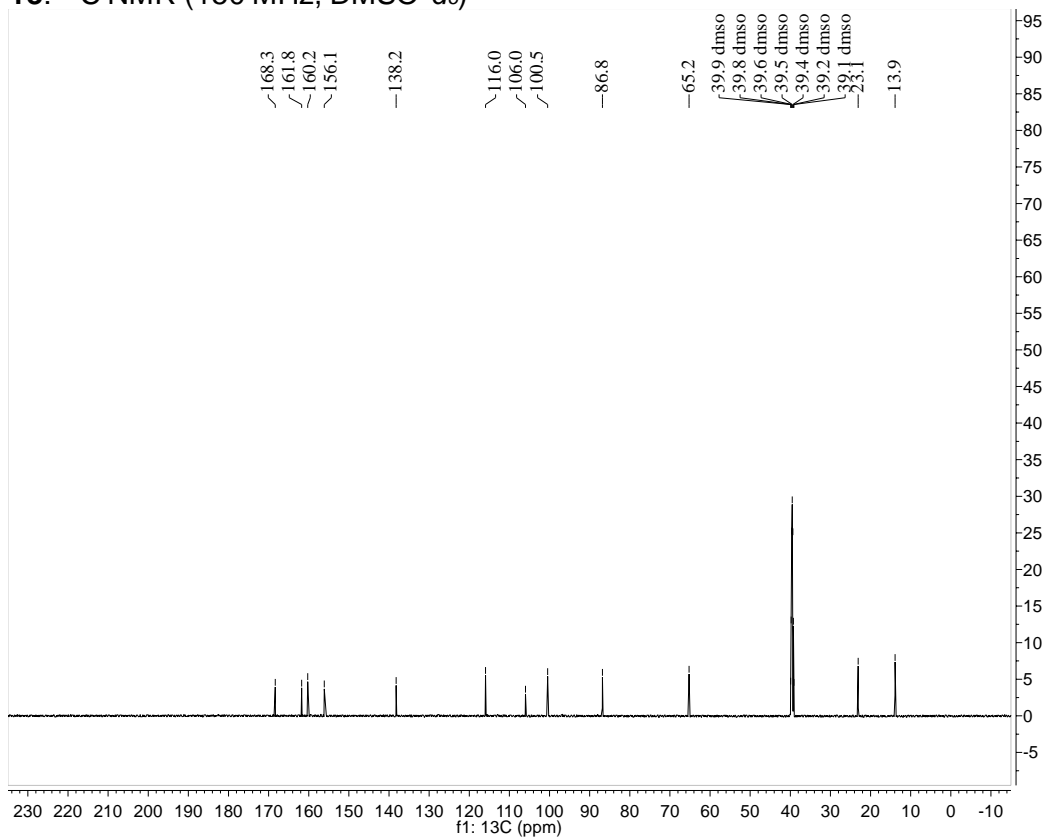

19: <sup>1</sup>H NMR (600 MHz, acetone-d<sub>6</sub>)

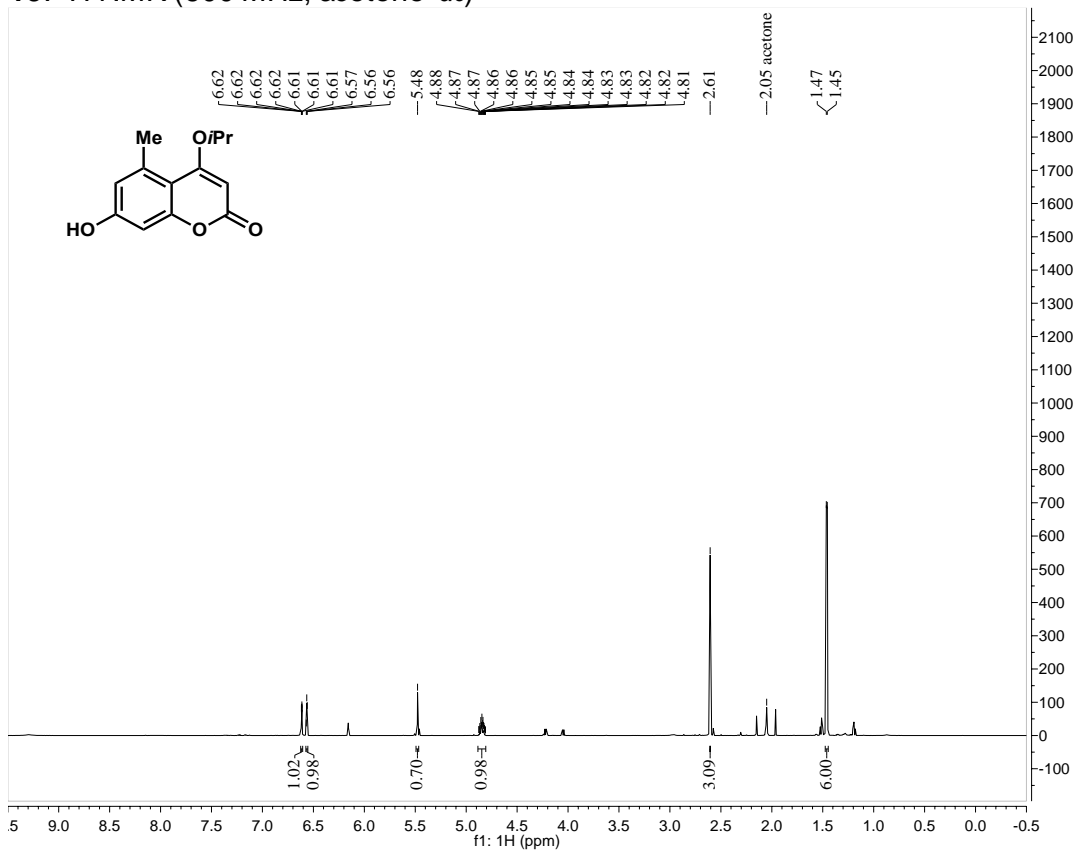

19: <sup>13</sup>C NMR (150 MHz, acetone-d<sub>6</sub>)

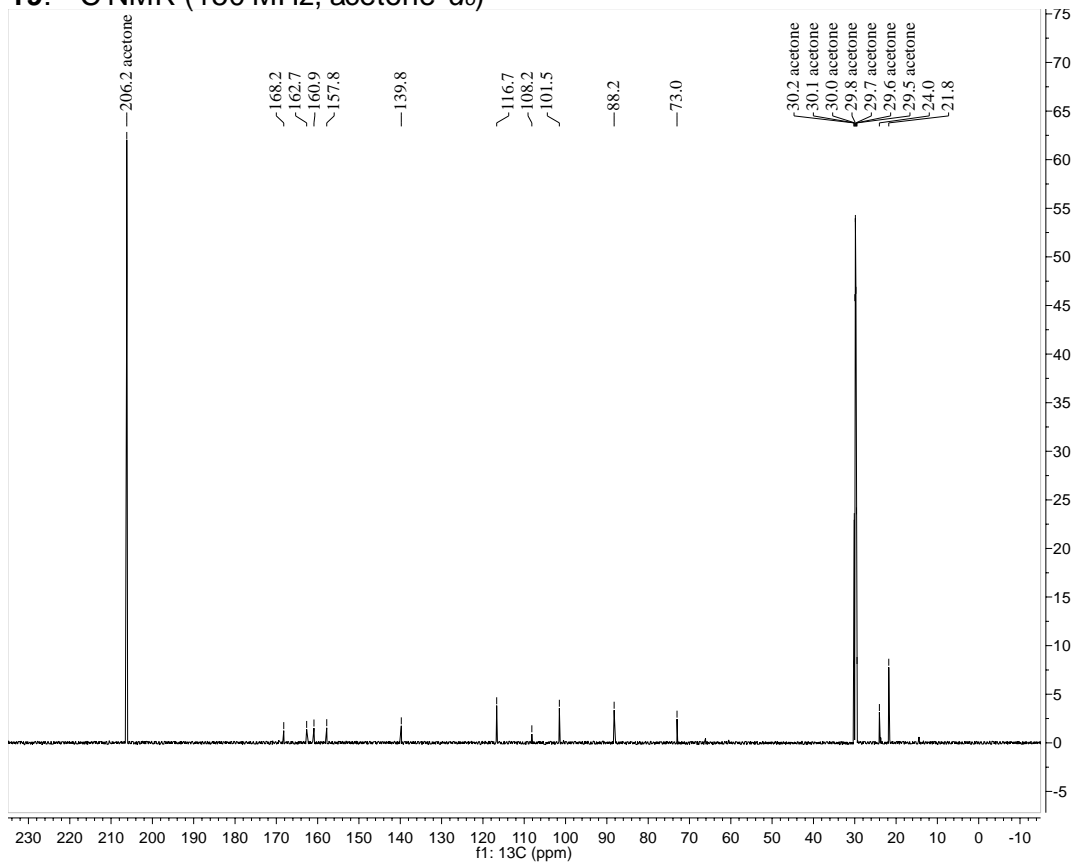

20: <sup>1</sup>H NMR (600 MHz, acetone-d<sub>6</sub>)

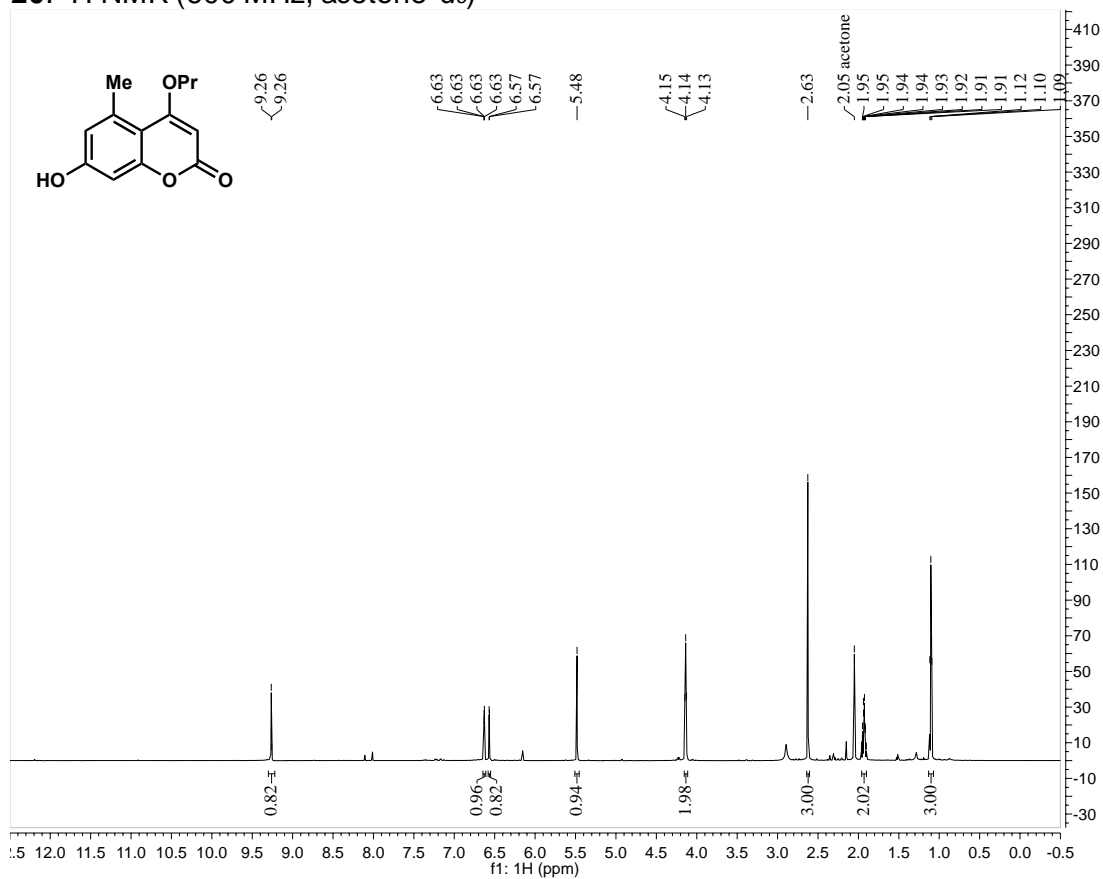

20: <sup>13</sup>C NMR (150 MHz, acetone-d<sub>6</sub>)

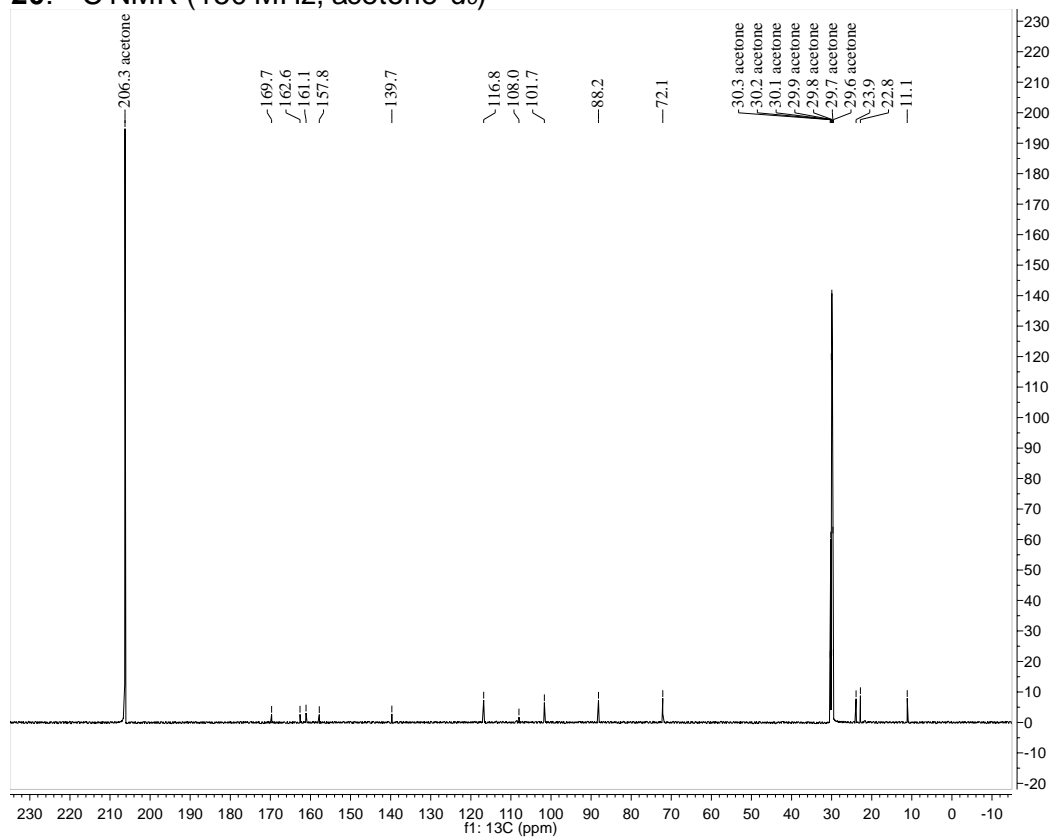

21: <sup>1</sup>H NMR (600 MHz, acetone-*d*<sub>6</sub>)

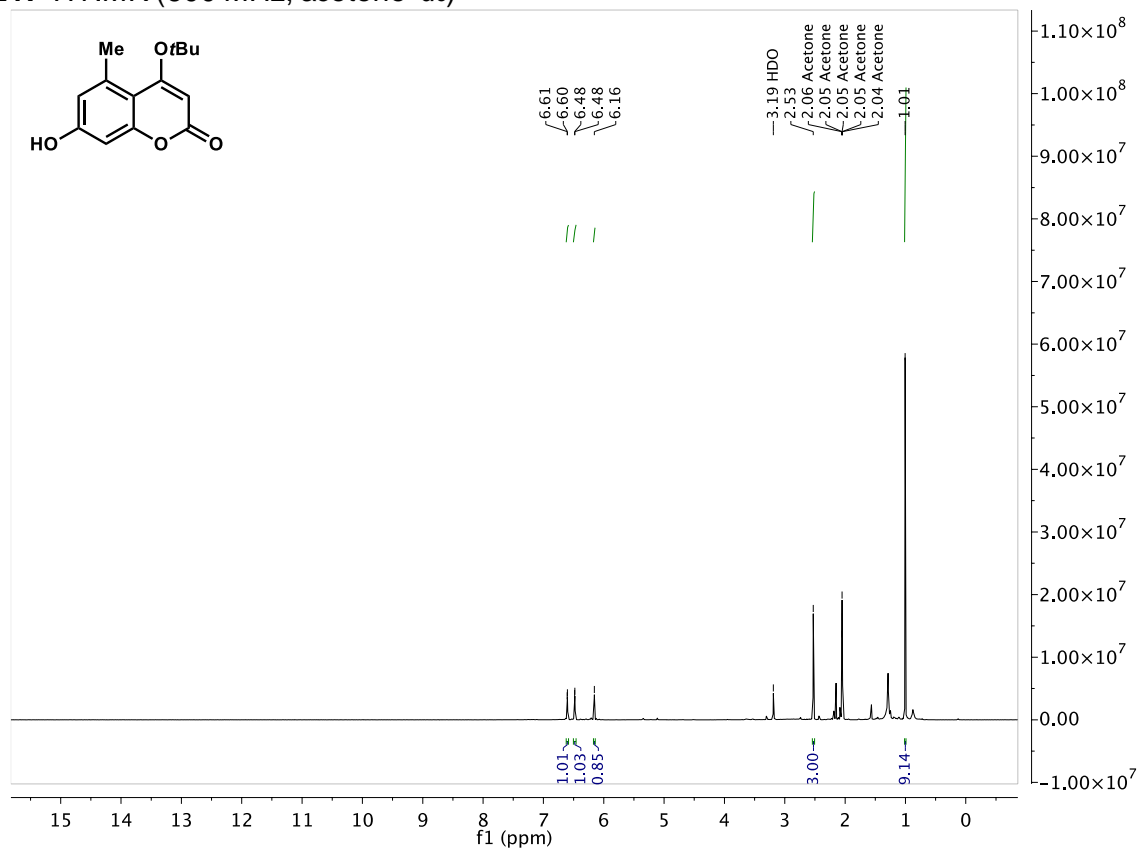

21: <sup>13</sup>C NMR (150 MHz, acetone-*d*<sub>6</sub>)

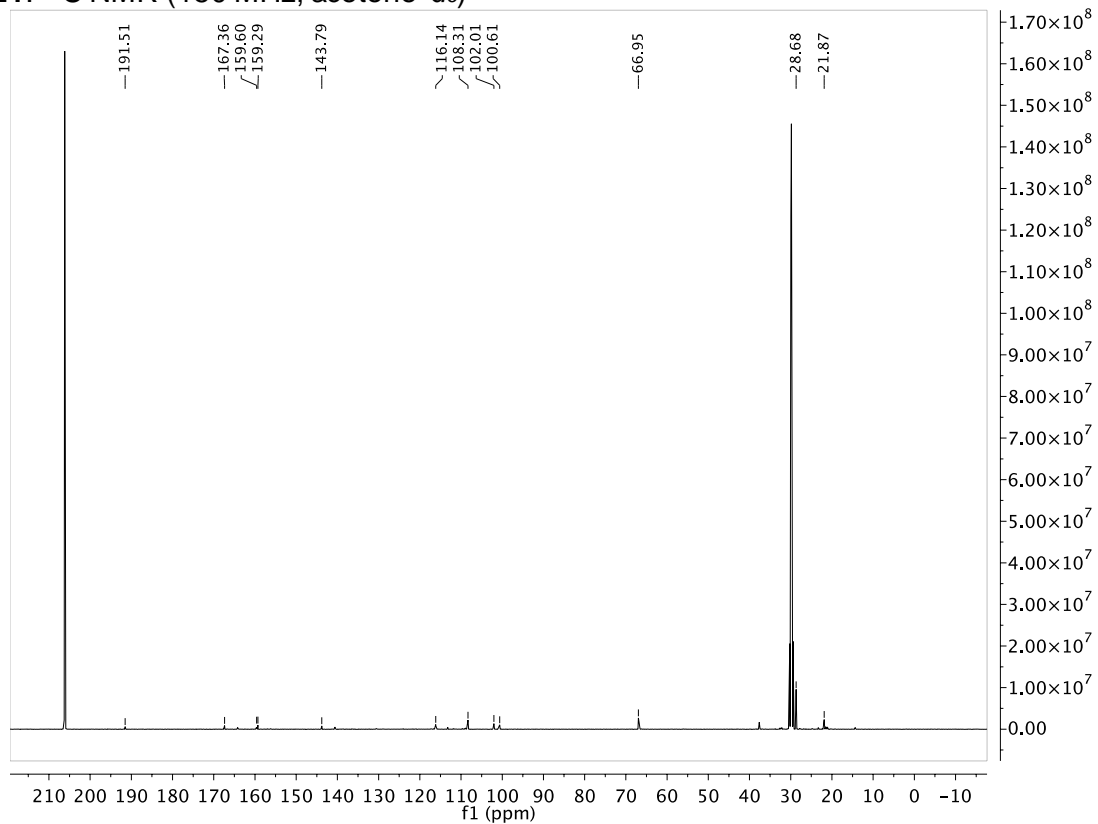

22: <sup>1</sup>H NMR (600 MHz, CD<sub>3</sub>OD)

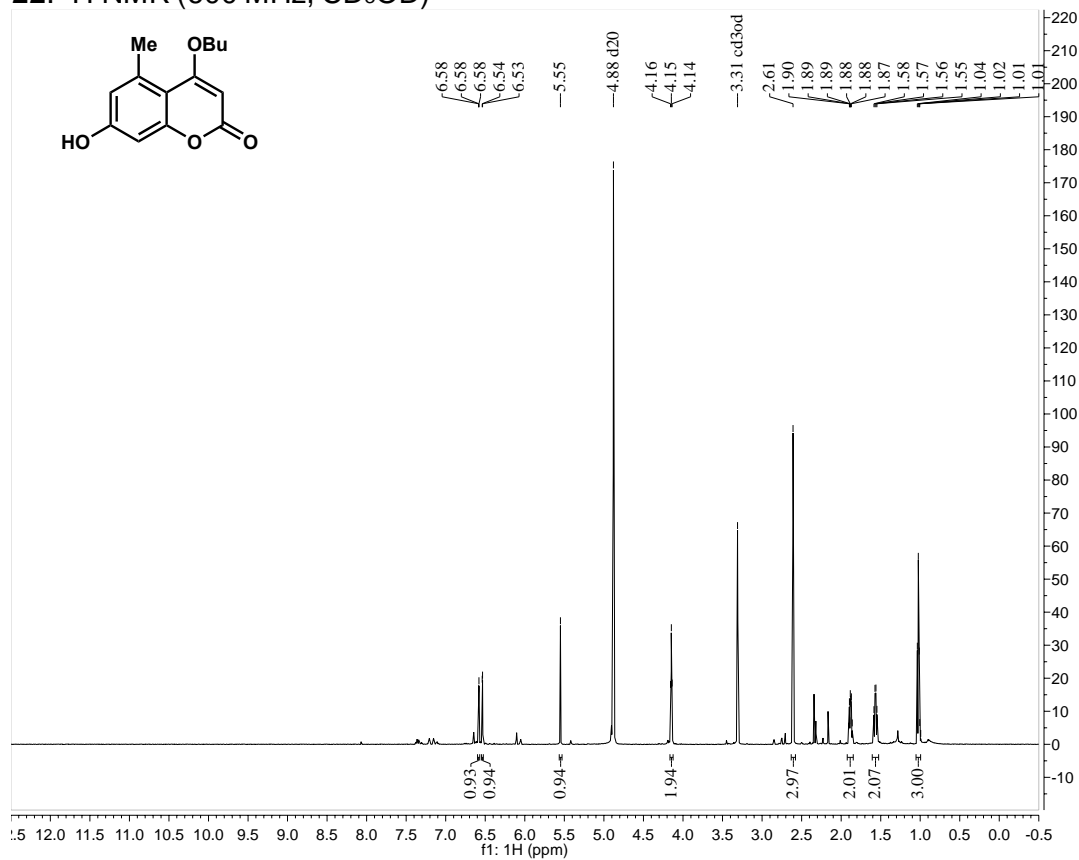

22: <sup>13</sup>C NMR (150 MHz, CD<sub>3</sub>OD)

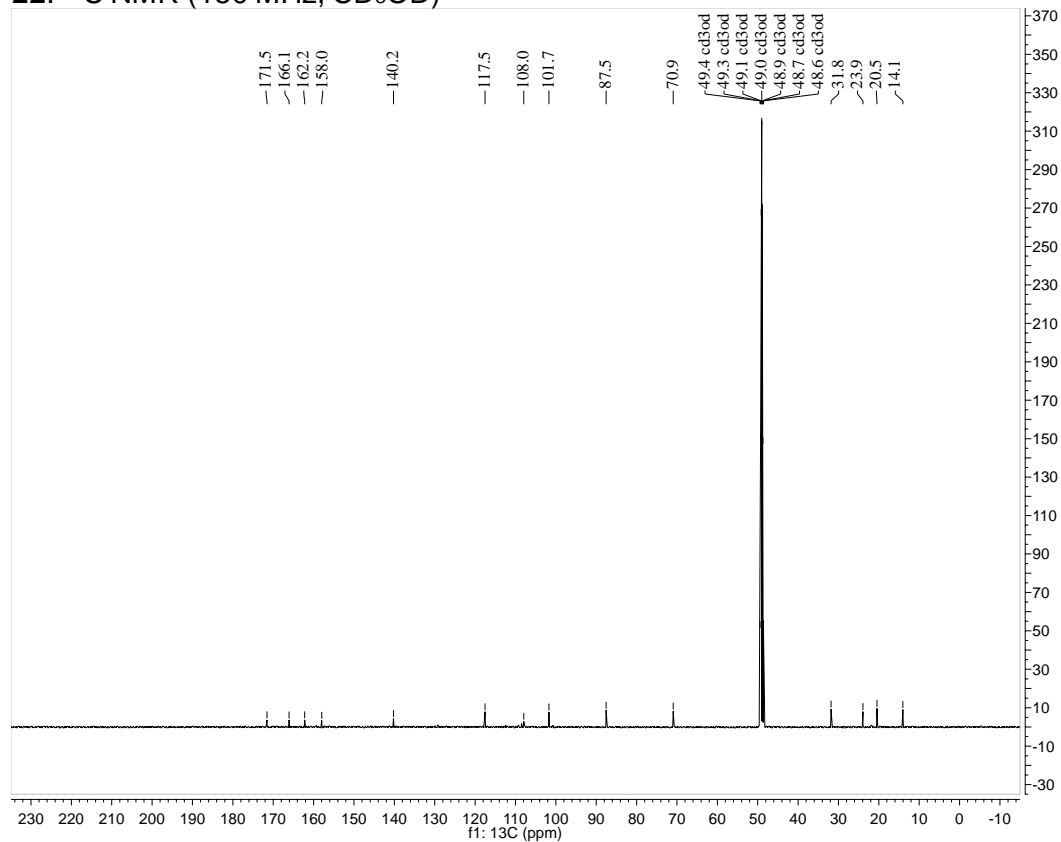



S8: <sup>1</sup>H NMR (600 MHz, CDCl<sub>3</sub>)

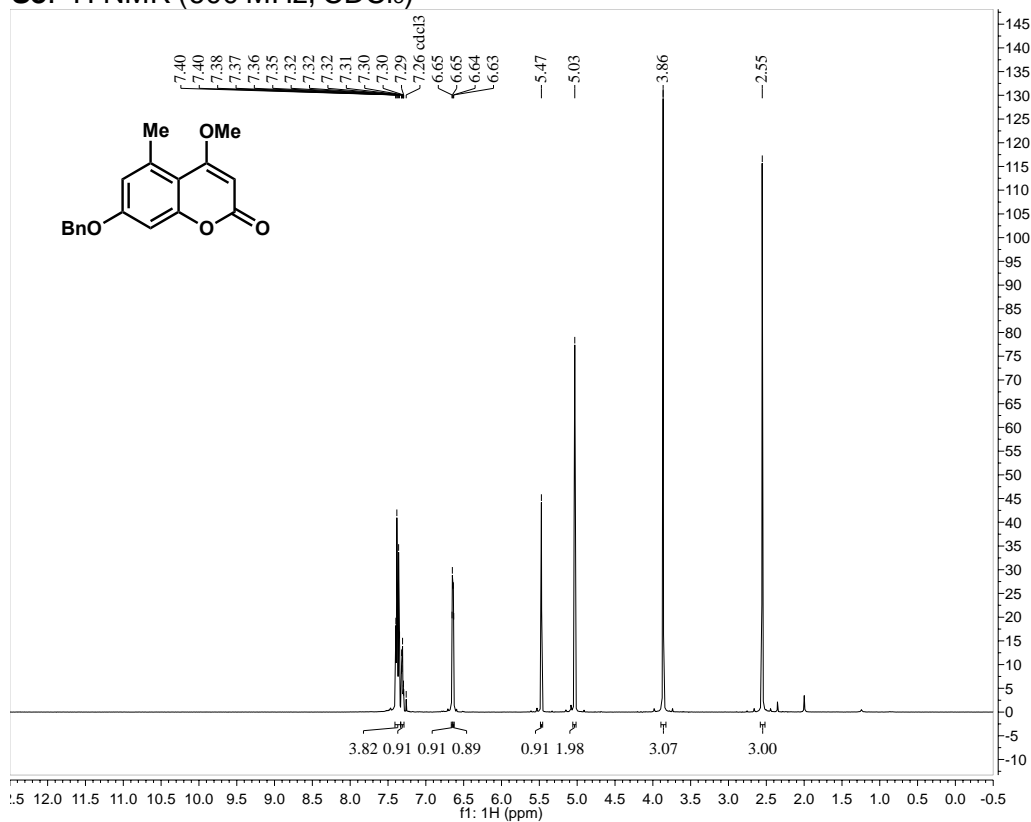

S8: <sup>13</sup>C NMR (150 MHz, CDCl<sub>3</sub>)

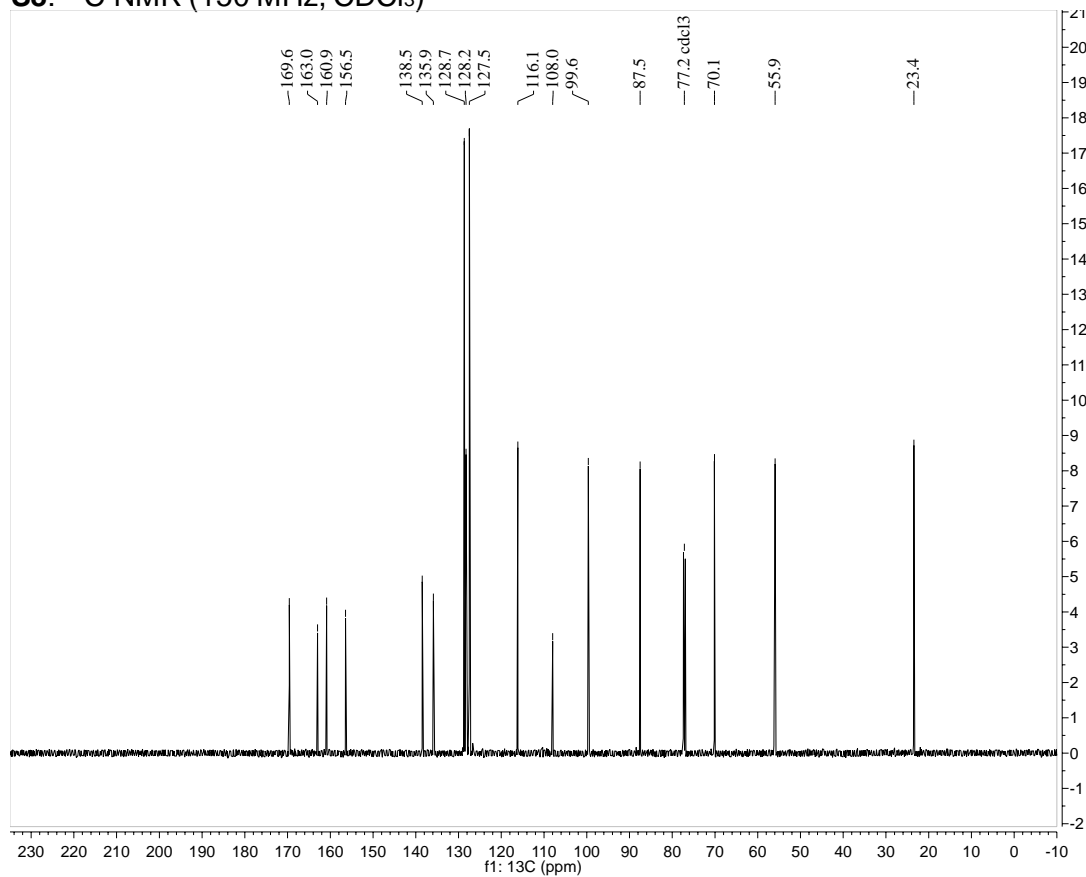

S9: <sup>1</sup>H NMR (600 MHz, CDCl<sub>3</sub>)

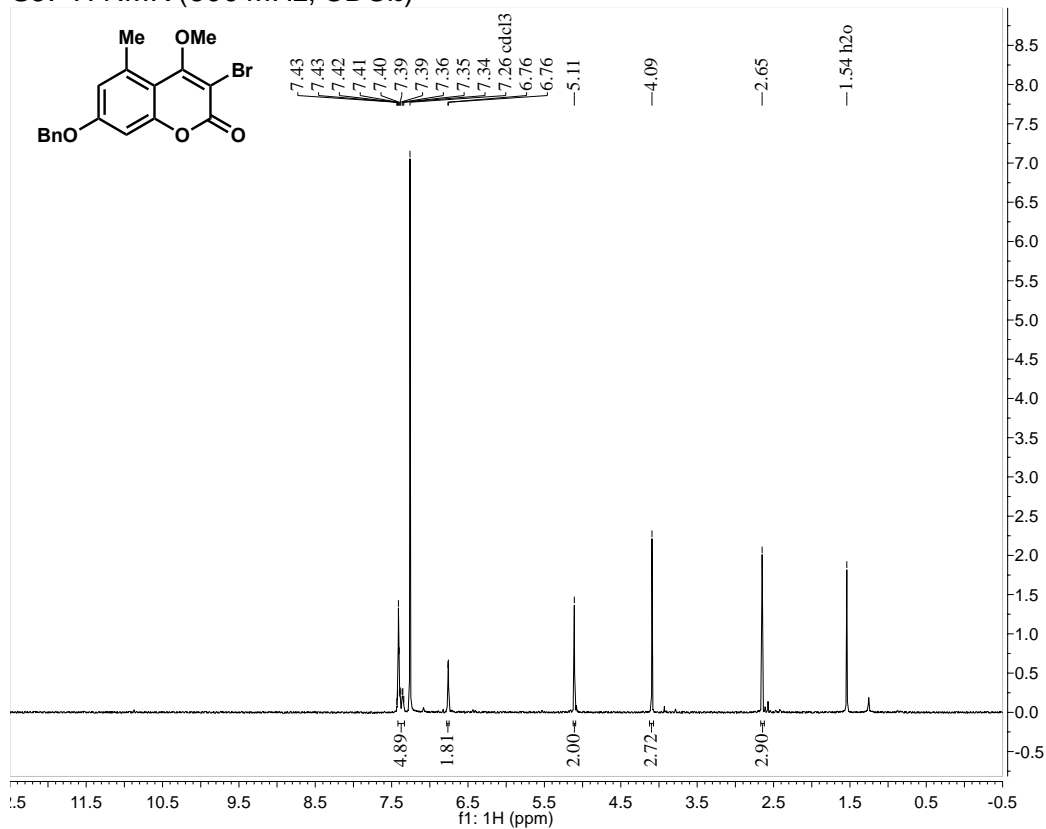

S9: <sup>13</sup>C NMR (150 MHz, CDCl<sub>3</sub>)

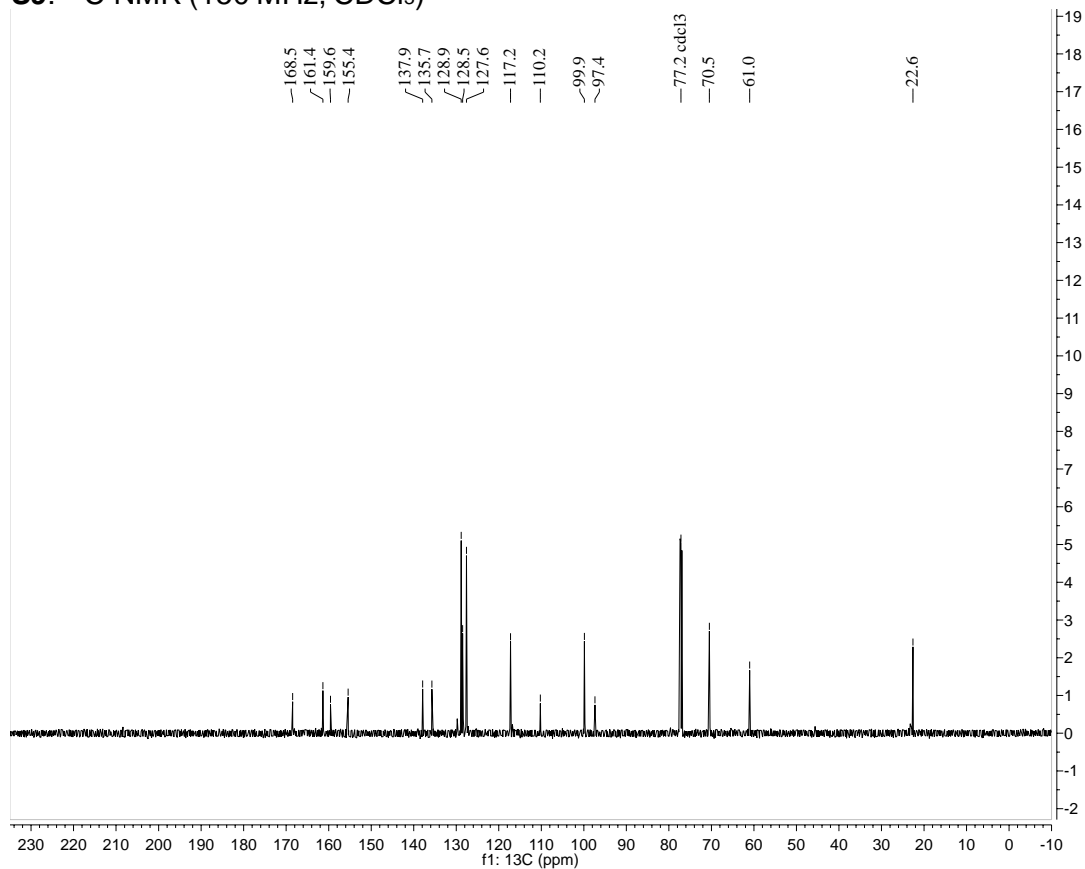

**S10:** <sup>1</sup>H NMR (400 MHz, CDCl<sub>3</sub>)

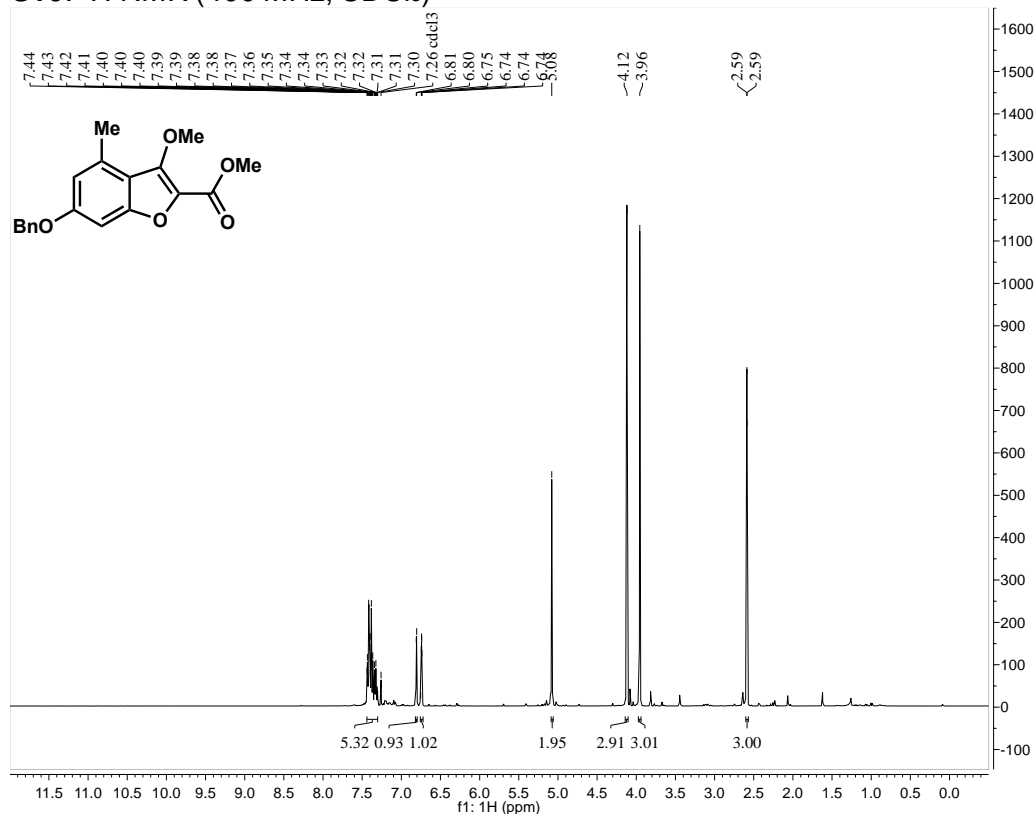

**S10:** <sup>13</sup>C NMR (100 MHz, CDCl<sub>3</sub>)

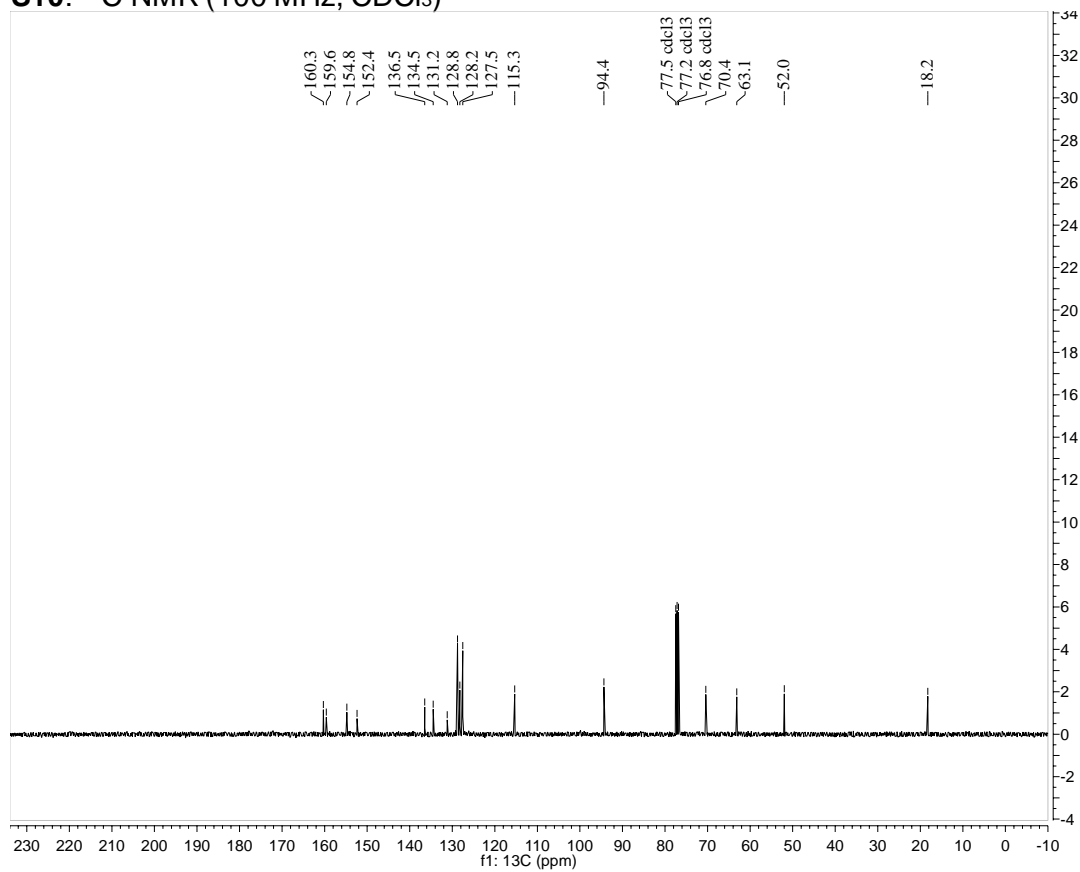

27: <sup>1</sup>H NMR (600 MHz, CD<sub>3</sub>OD)

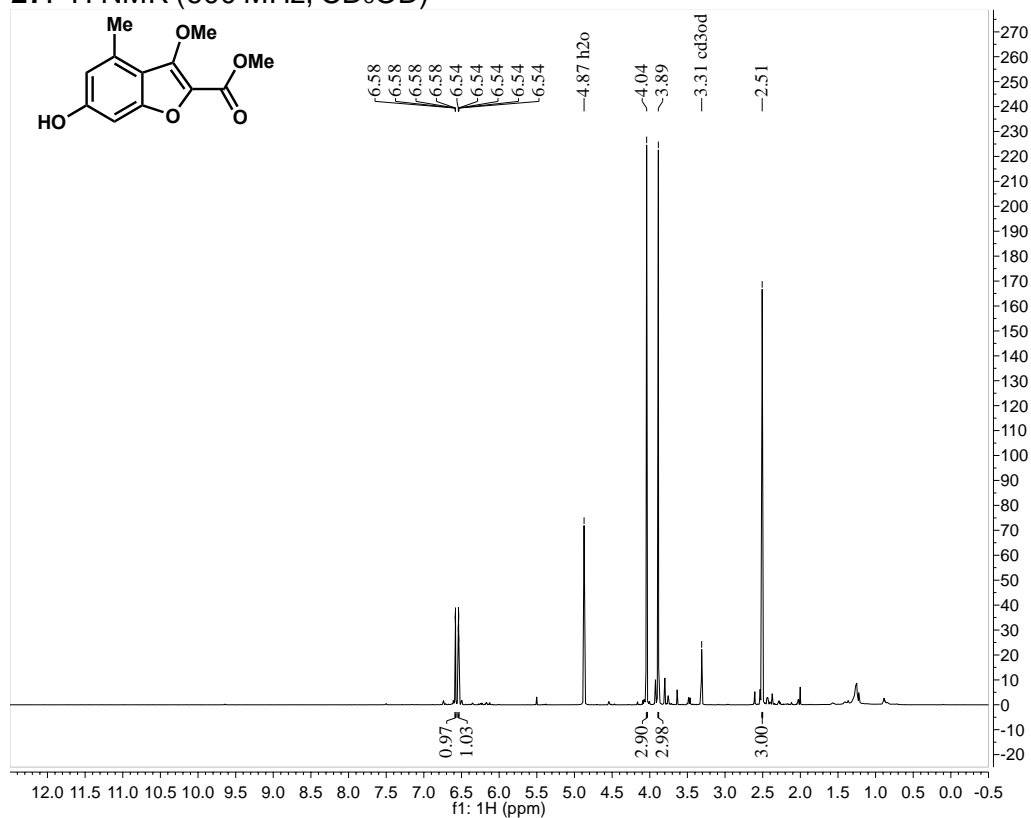

27: <sup>13</sup>C NMR (150 MHz, CD<sub>3</sub>OD)

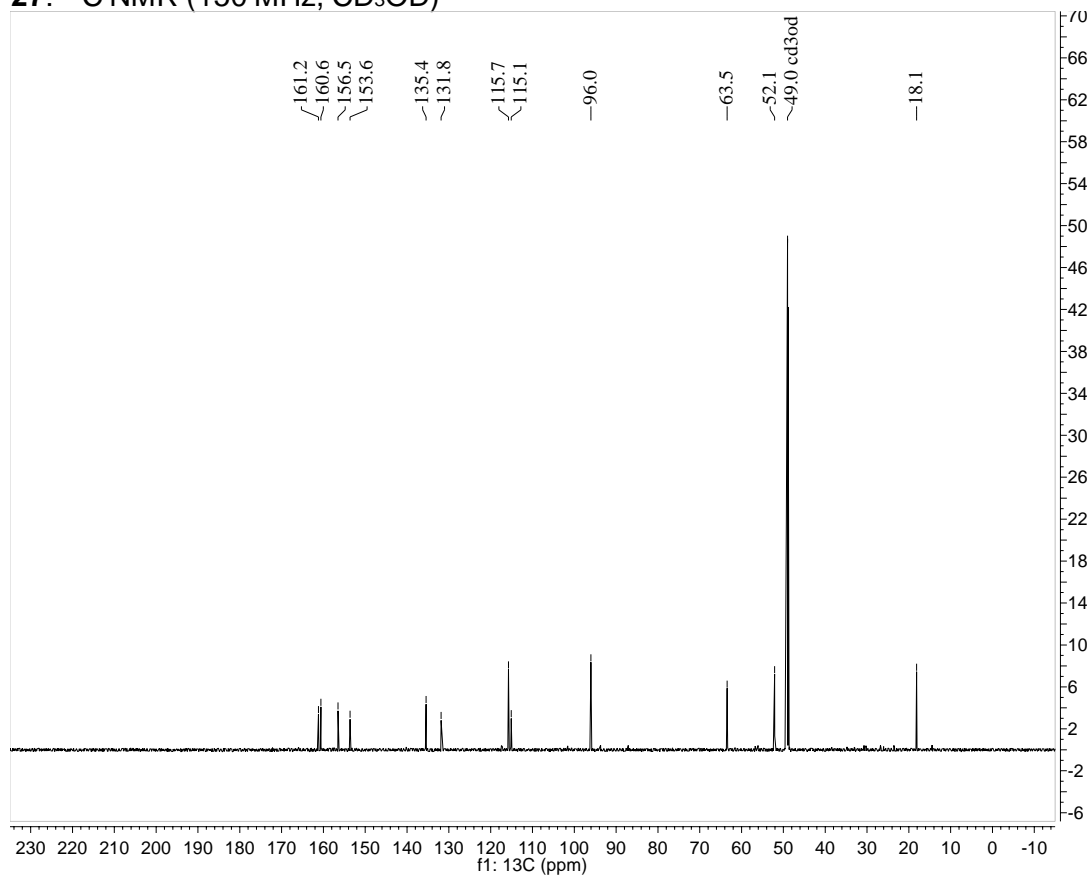

7: <sup>1</sup>H NMR (400 MHz, DMSO-d<sub>6</sub>)

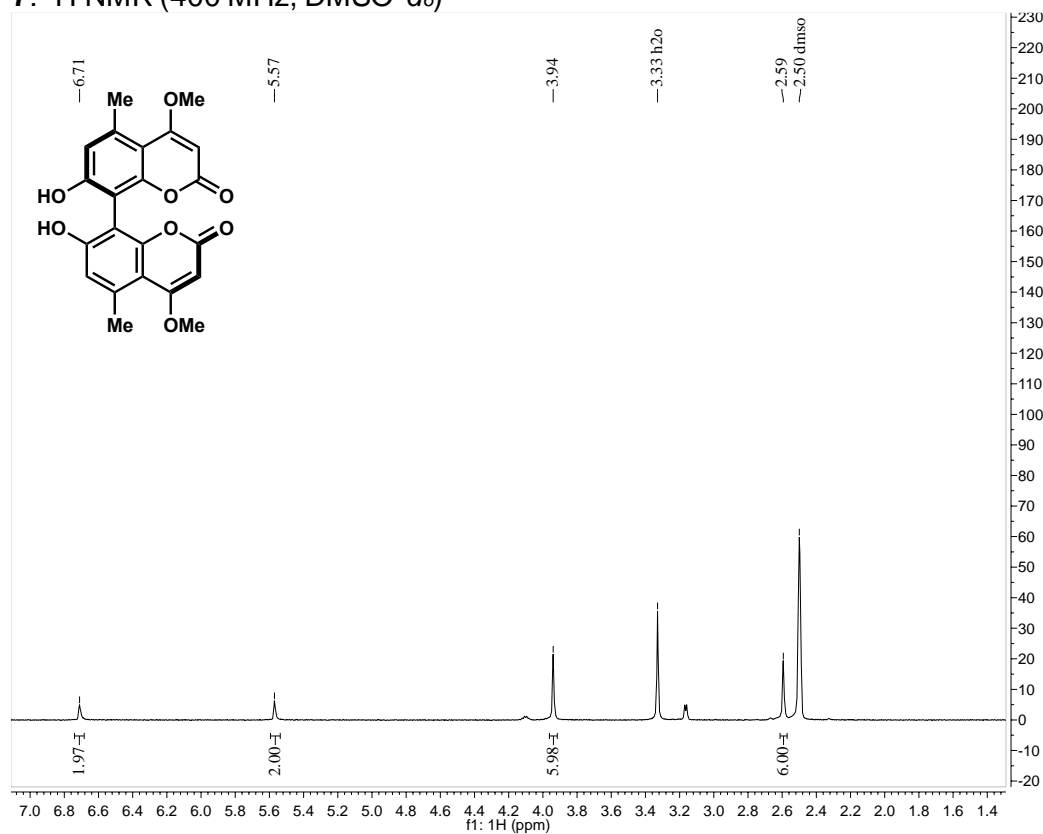

7: <sup>1</sup>H NMR (400 MHz, CD<sub>3</sub>OD)

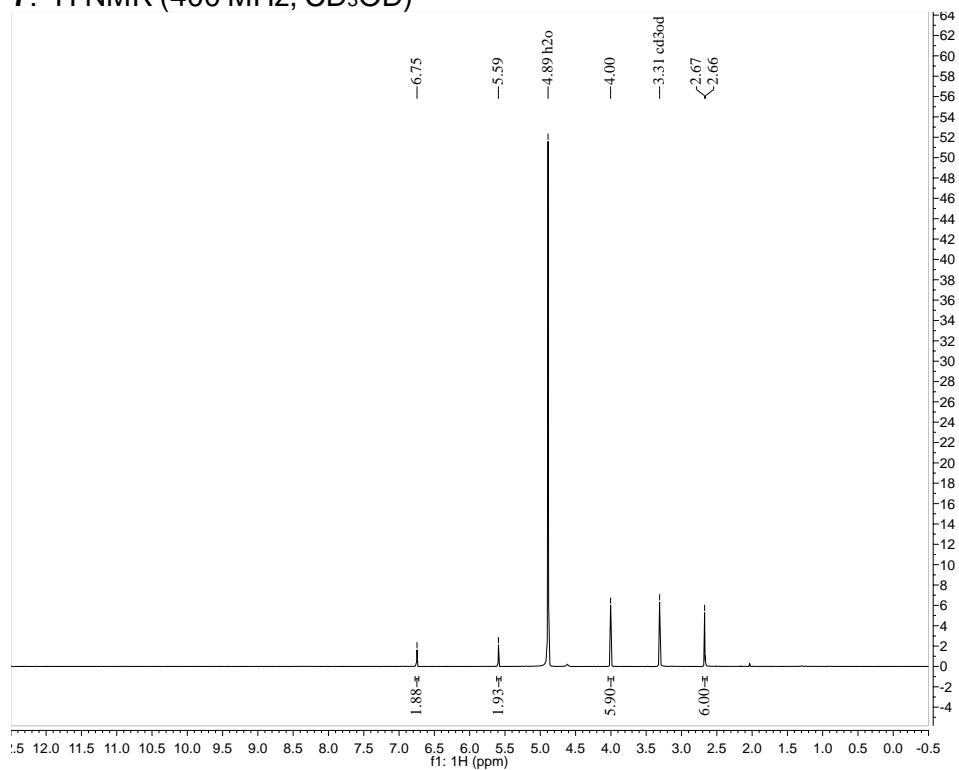

S11: <sup>1</sup>H NMR (400 MHz, DMSO-d<sub>6</sub>)

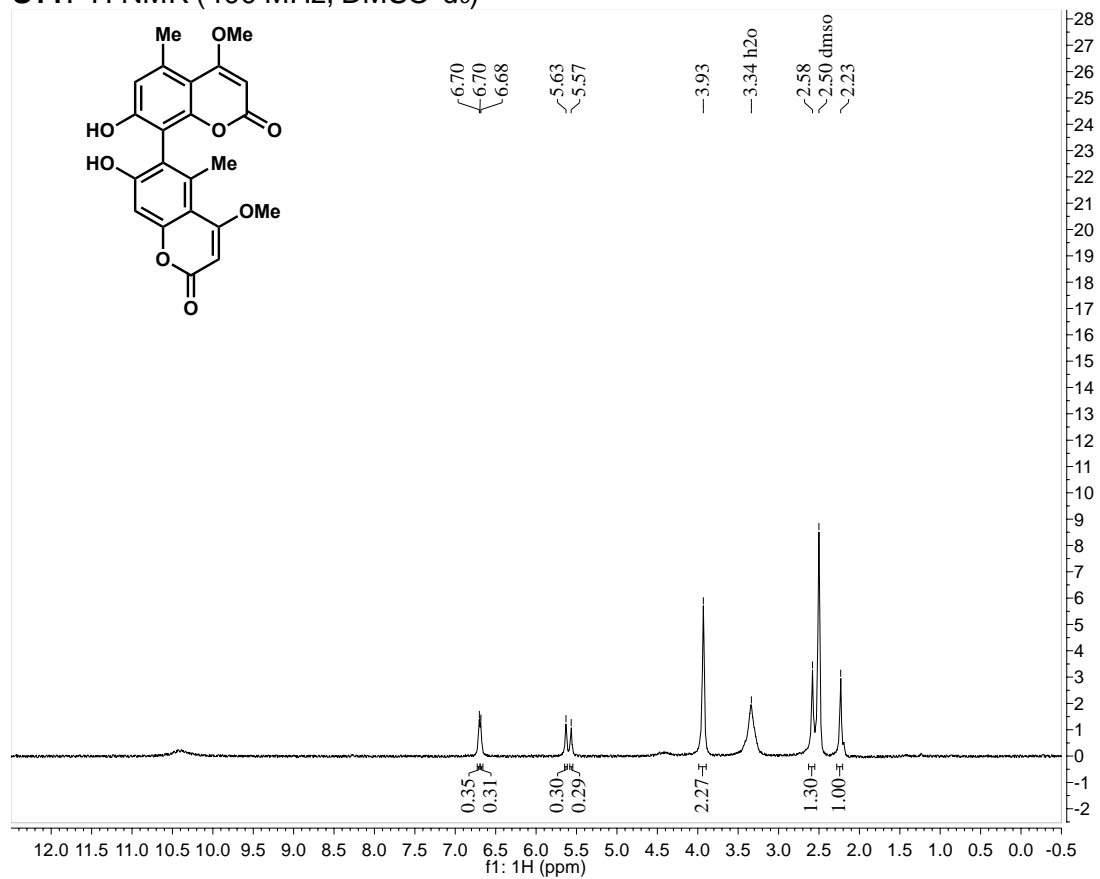

23: <sup>1</sup>H NMR (400 MHz, acetone-d<sub>6</sub>)

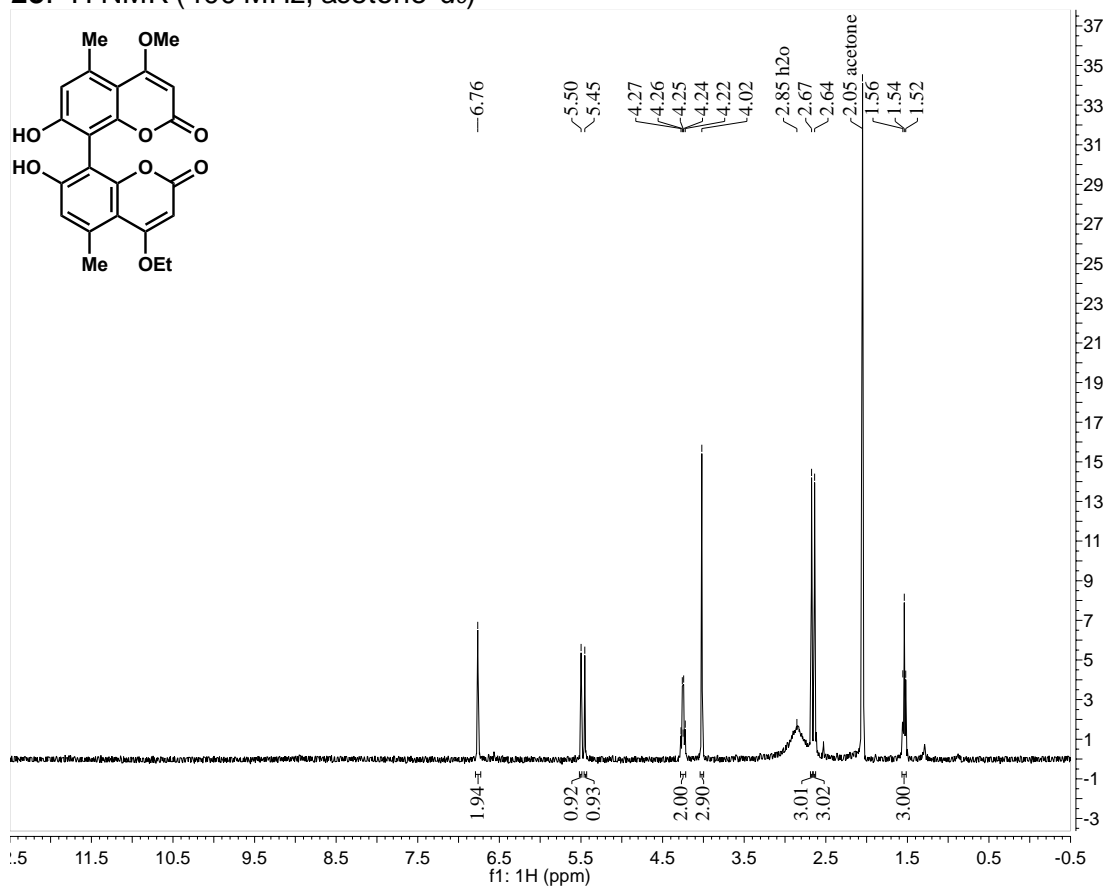

23: <sup>1</sup>H NMR (600 MHz, DMSO-d<sub>6</sub>)

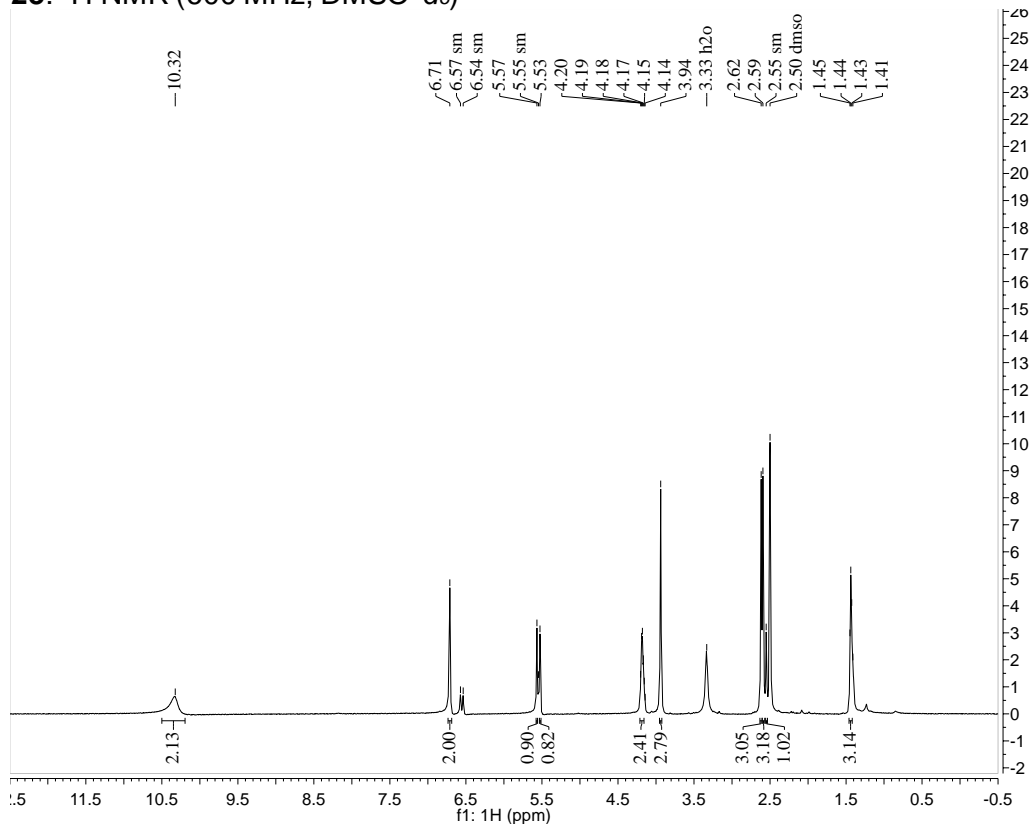

23: <sup>13</sup>C NMR (150 MHz, DMSO-d<sub>6</sub>)

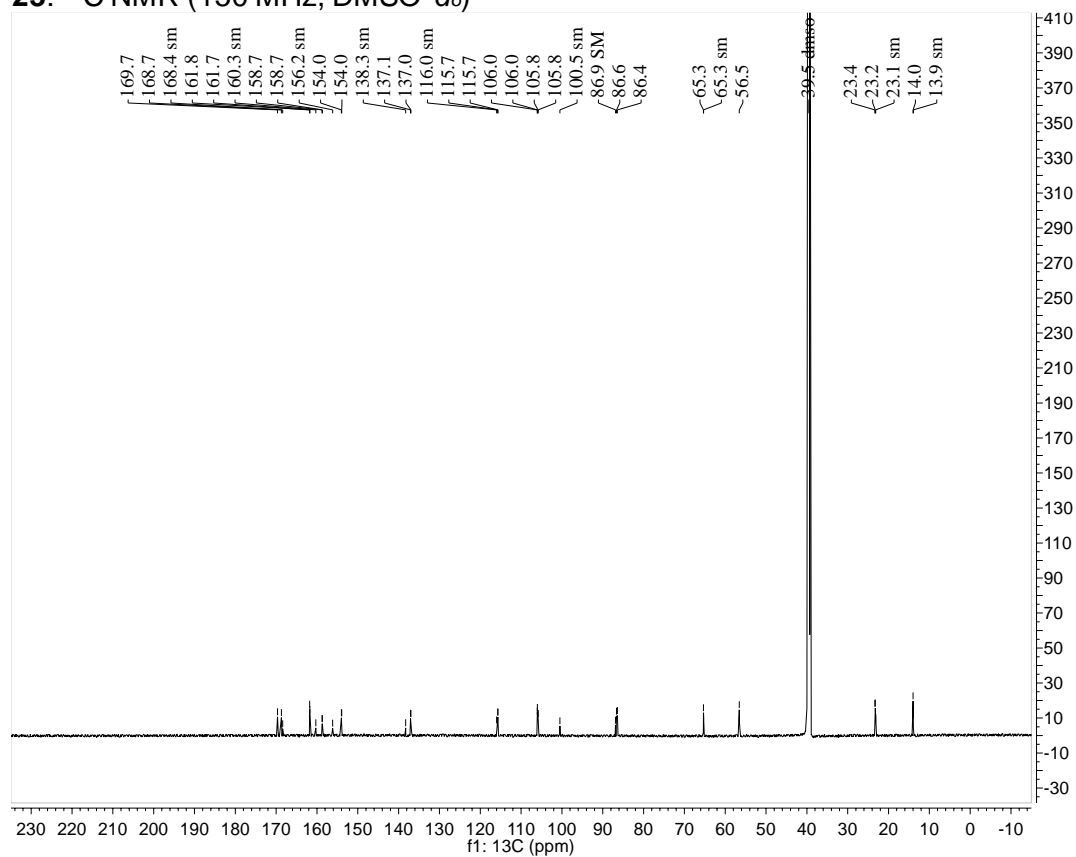



S12: <sup>1</sup>H NMR (600 MHz, CD<sub>3</sub>OD)

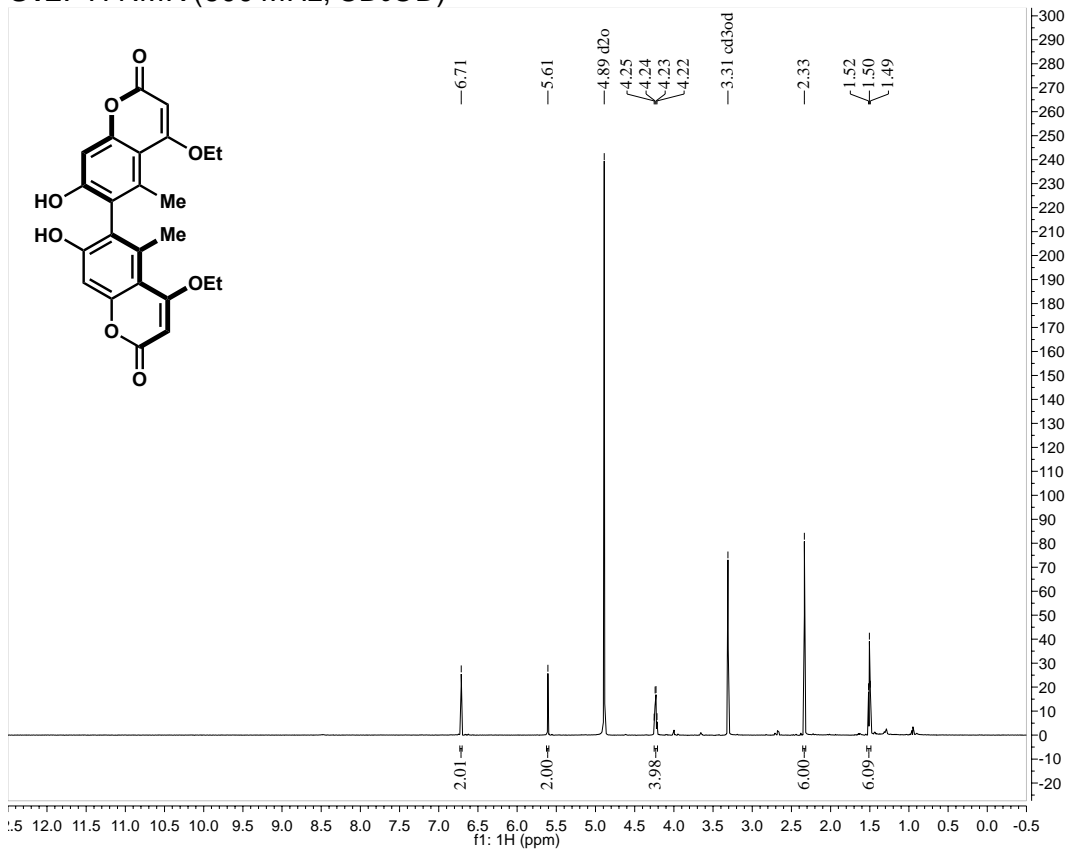

S12: <sup>13</sup>C NMR (150 MHz, CD<sub>3</sub>OD)

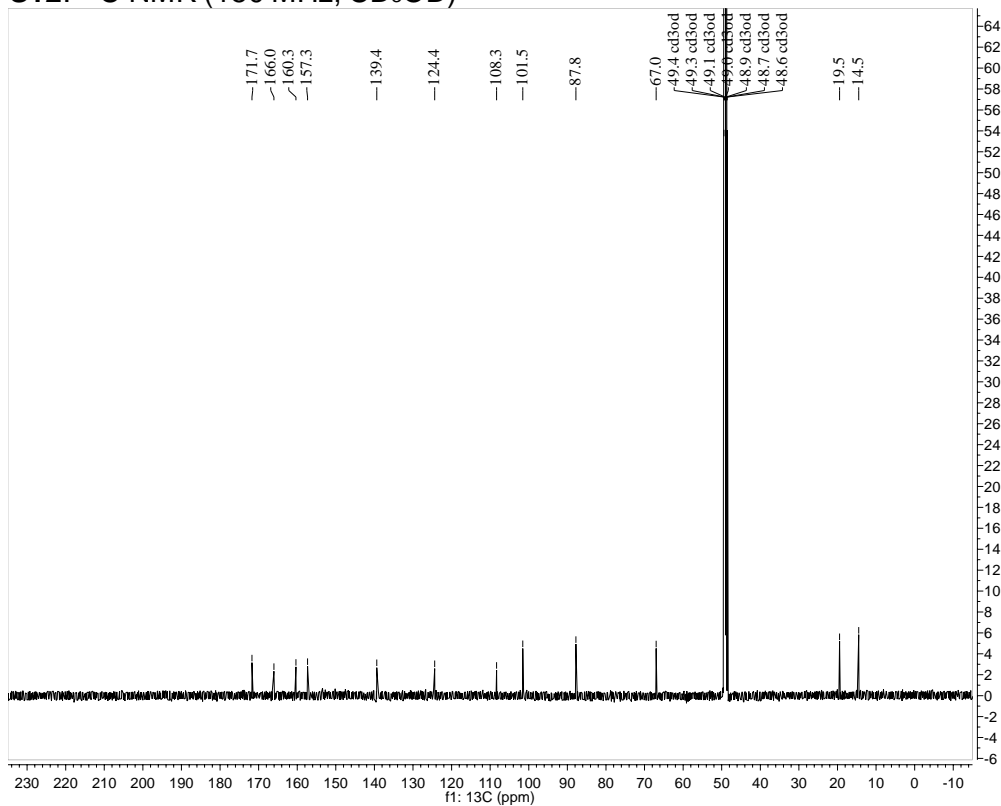

S13: <sup>1</sup>H NMR (400 MHz, CD<sub>3</sub>OD)

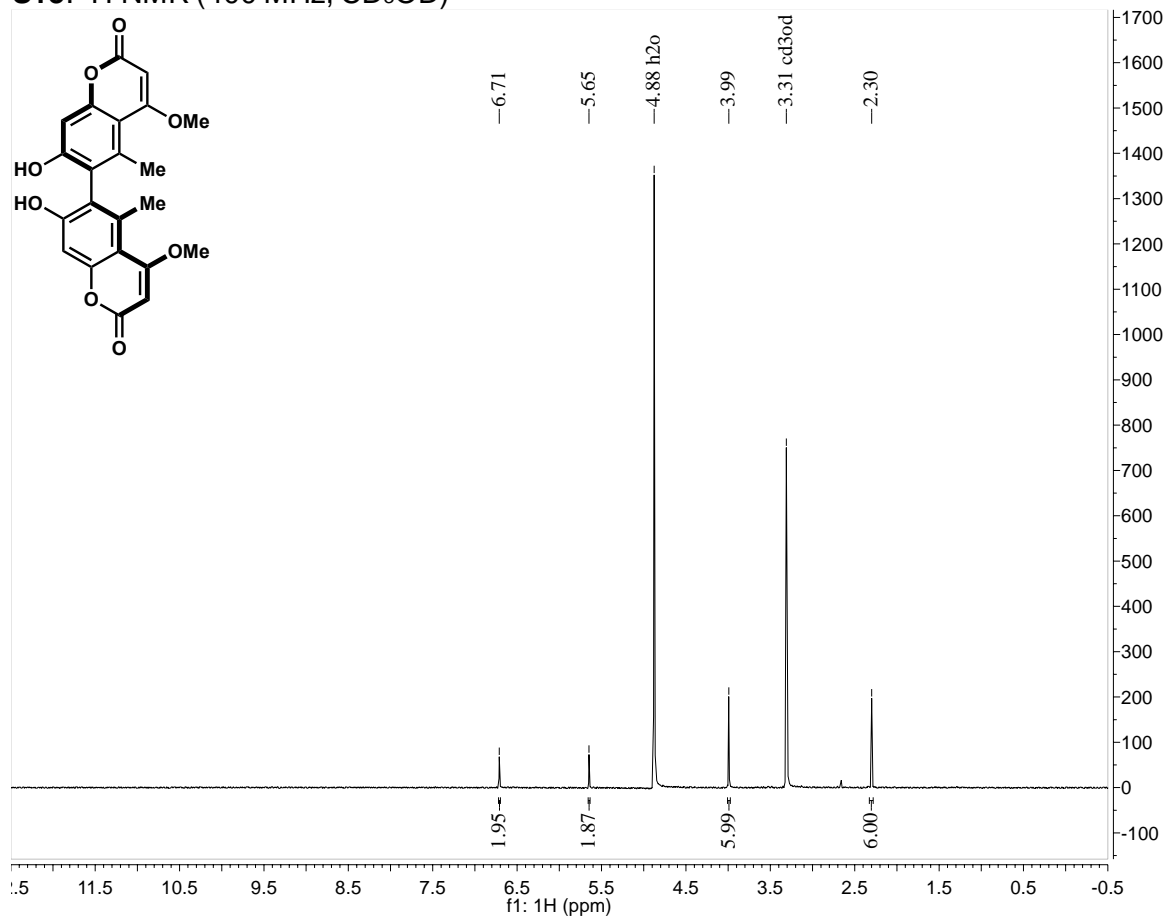

24: <sup>1</sup>H NMR (400 MHz, CD<sub>3</sub>OD)

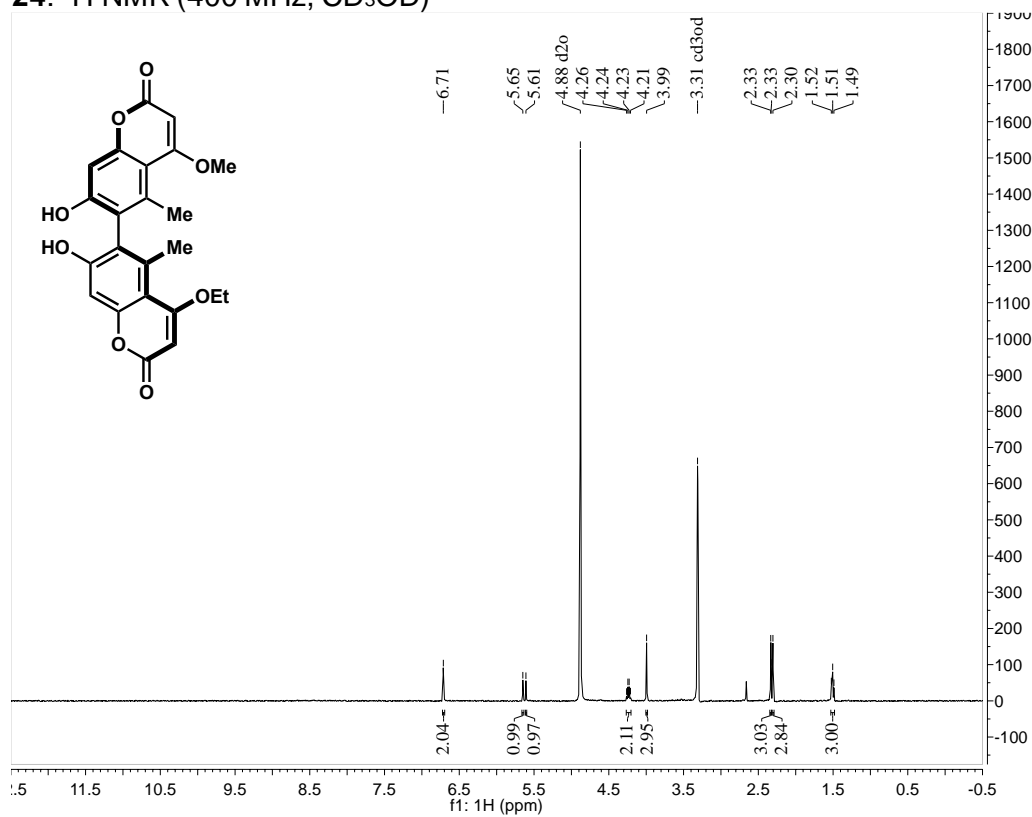

24: <sup>13</sup>C NMR (150 MHz, CD<sub>3</sub>OD)

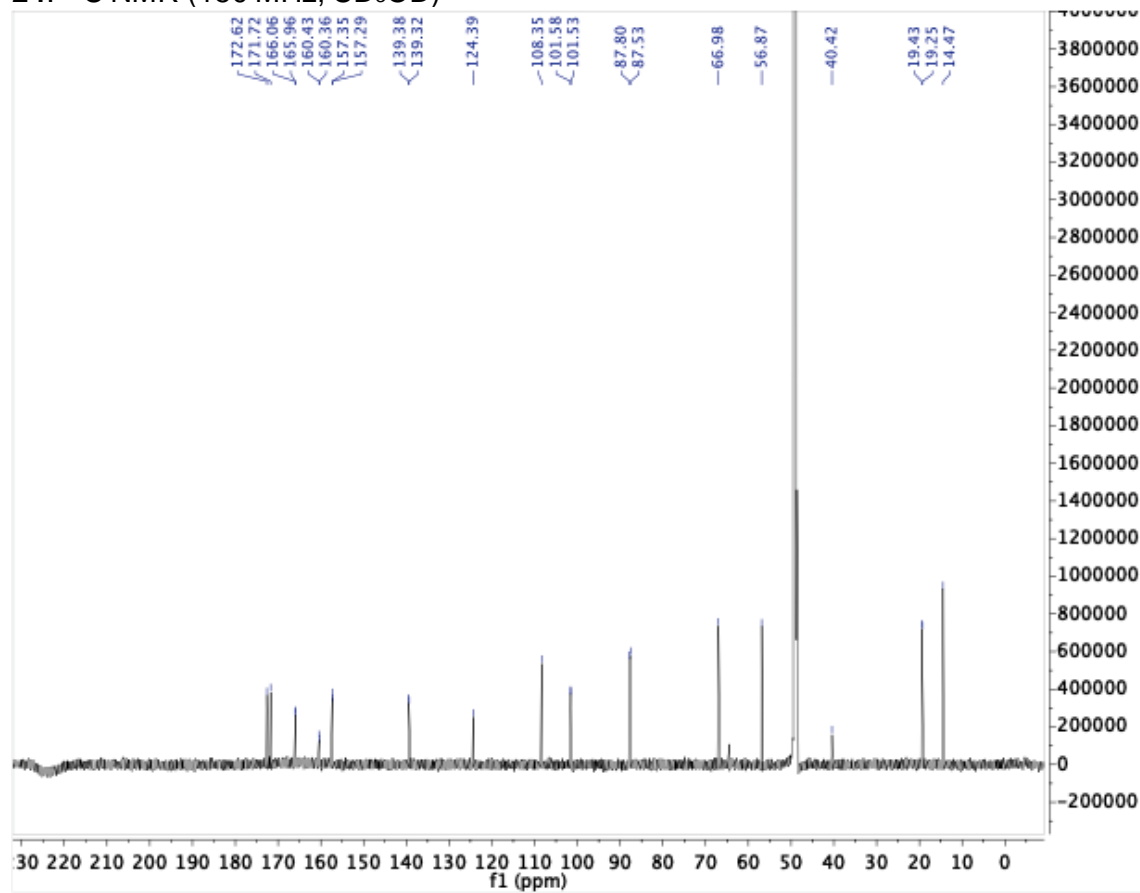

S14: <sup>1</sup>H NMR (400 MHz, Methanol-d<sub>4</sub>)

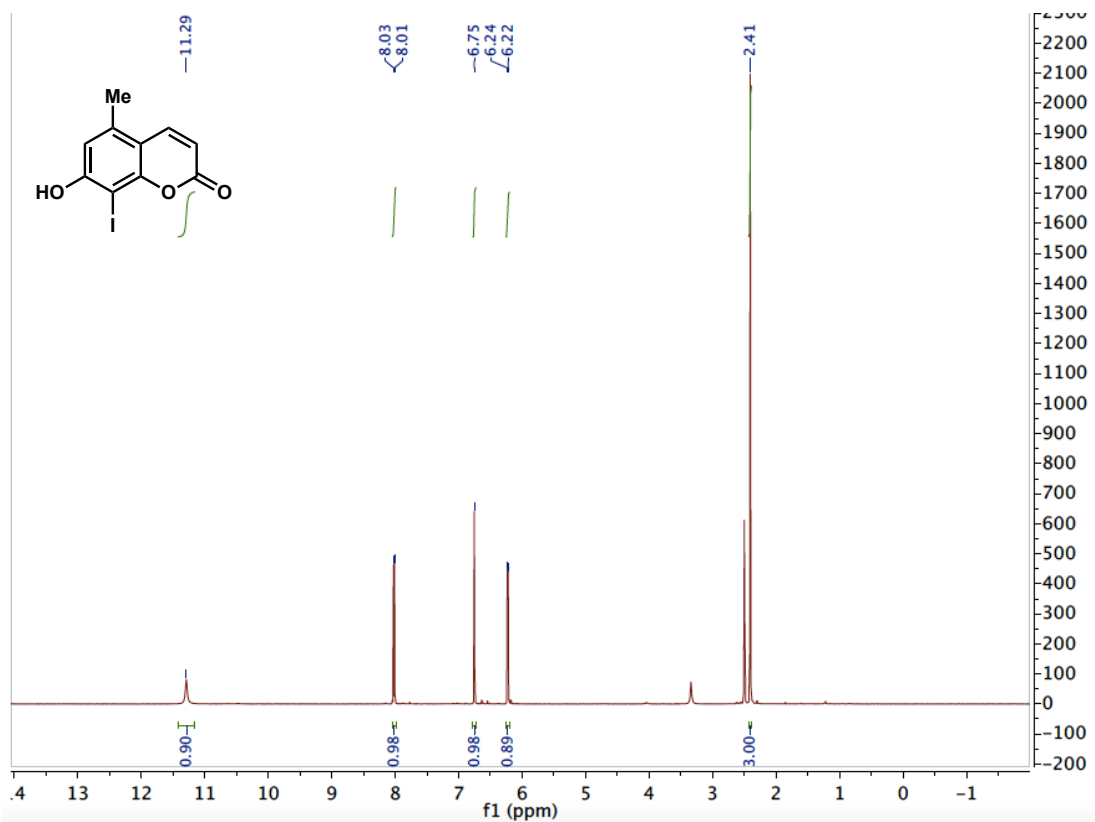

S14: <sup>13</sup>C NMR (150 MHz, DMSO-d<sub>6</sub>)

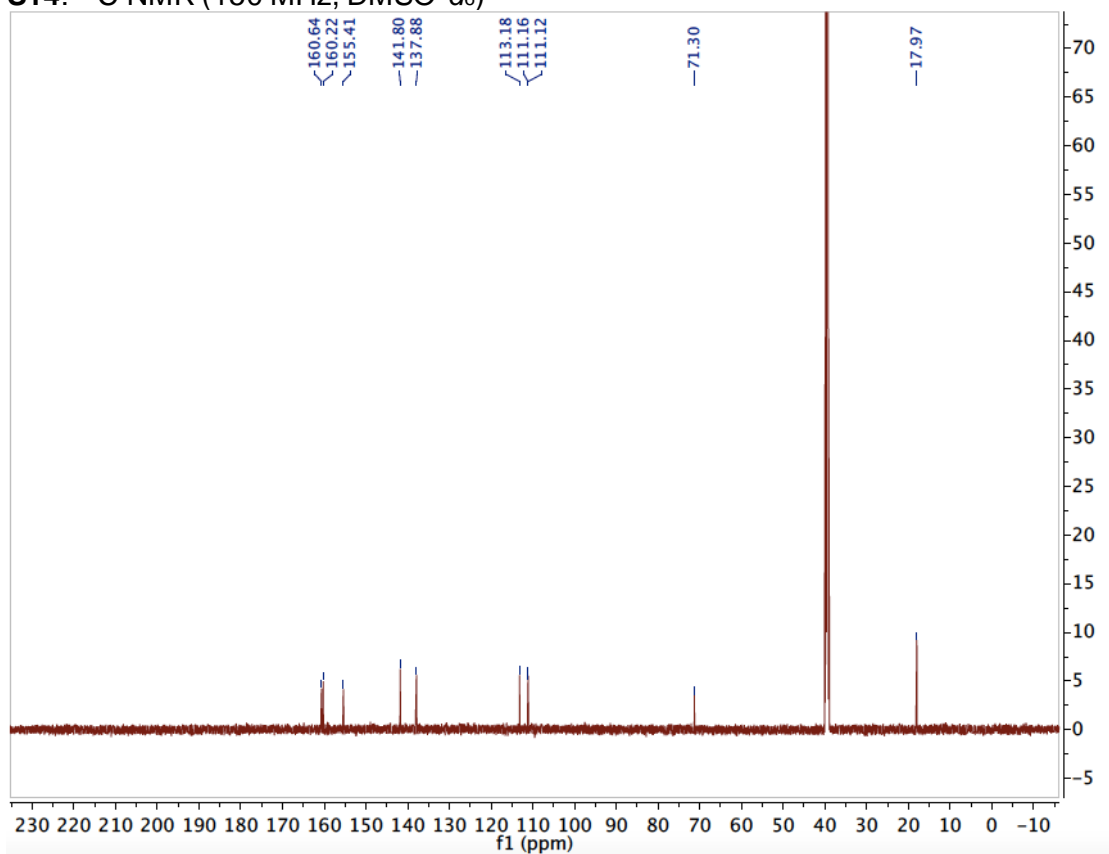

S15: <sup>1</sup>H NMR (600 MHz, CDCl<sub>3</sub>)

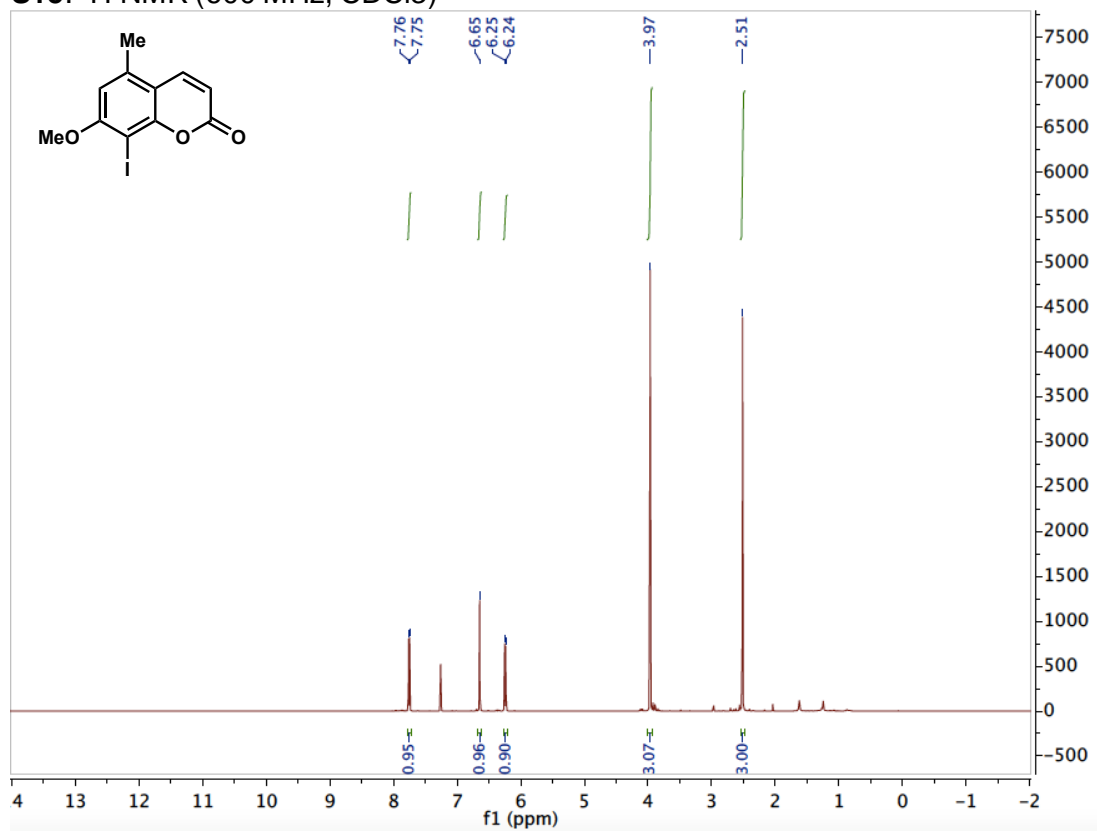

S15: <sup>13</sup>C NMR (150 MHz, CDCl<sub>3</sub>)

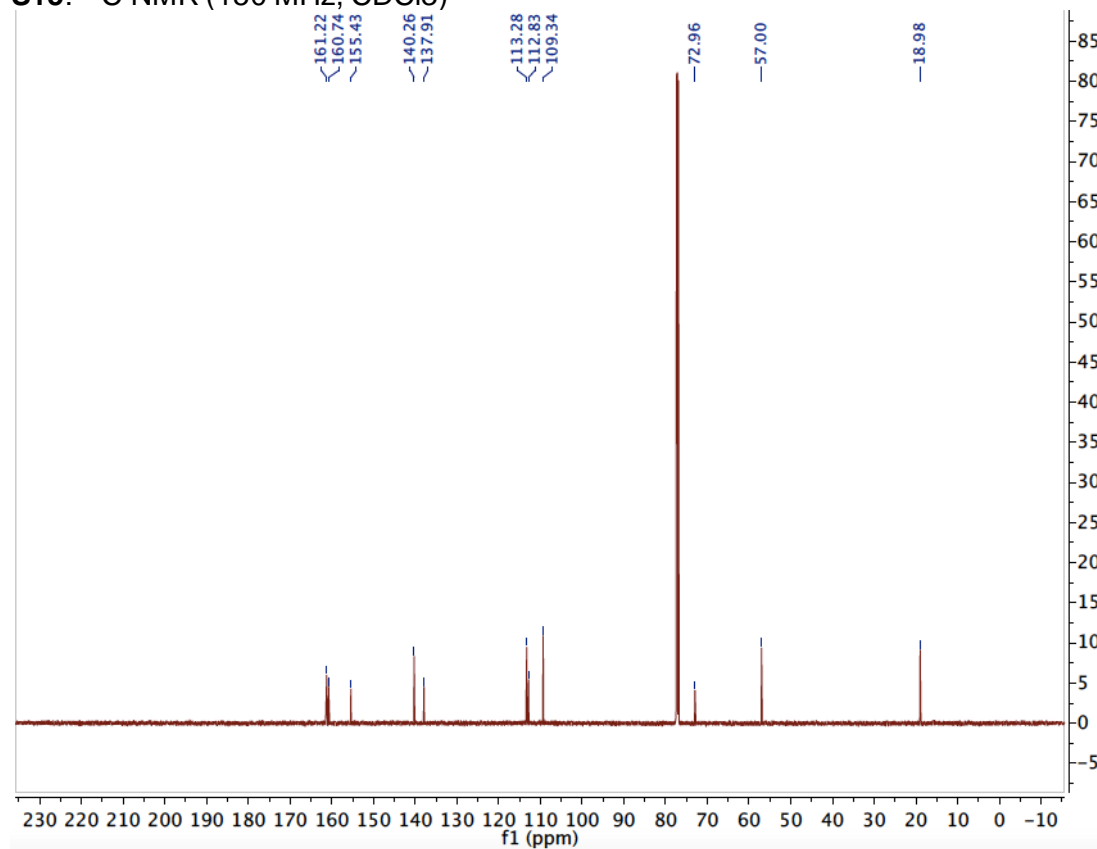

S17: <sup>1</sup>H NMR (800 MHz, acetone-d<sub>6</sub>)

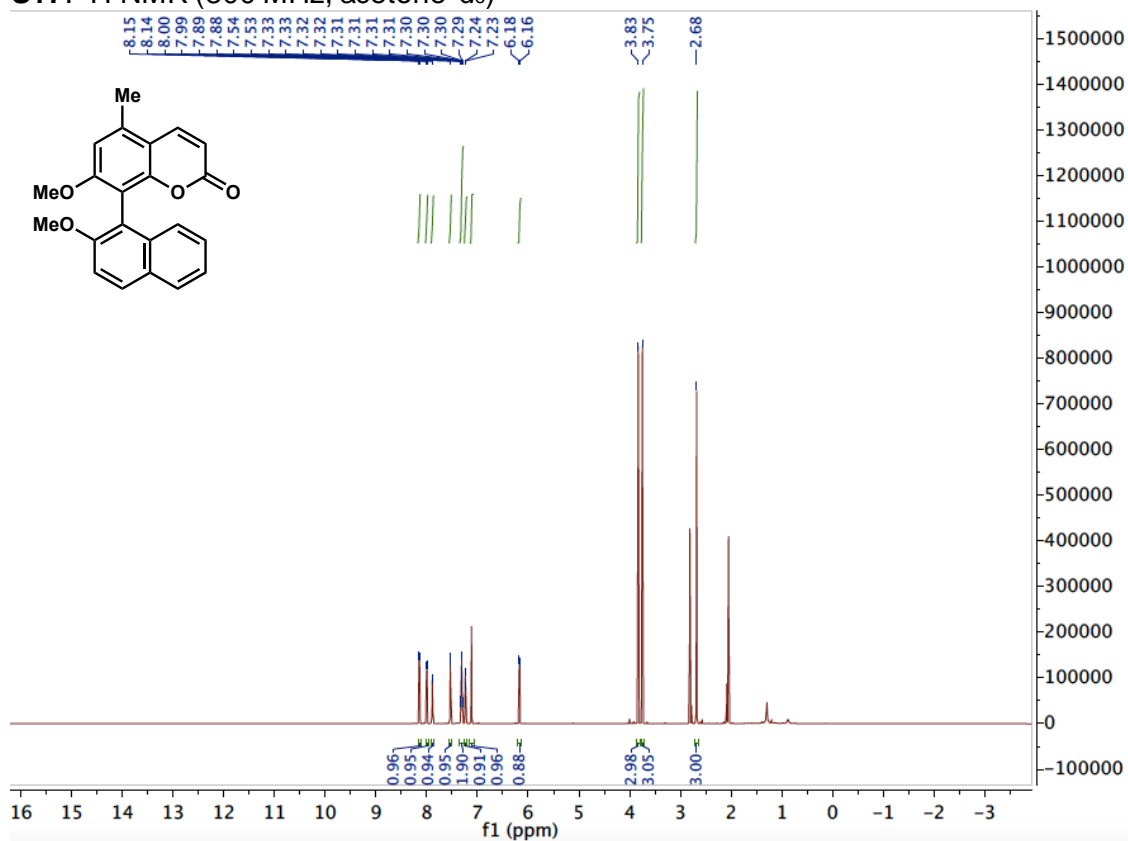

S17: <sup>13</sup>C NMR (200 MHz, acetone-d<sub>6</sub>)

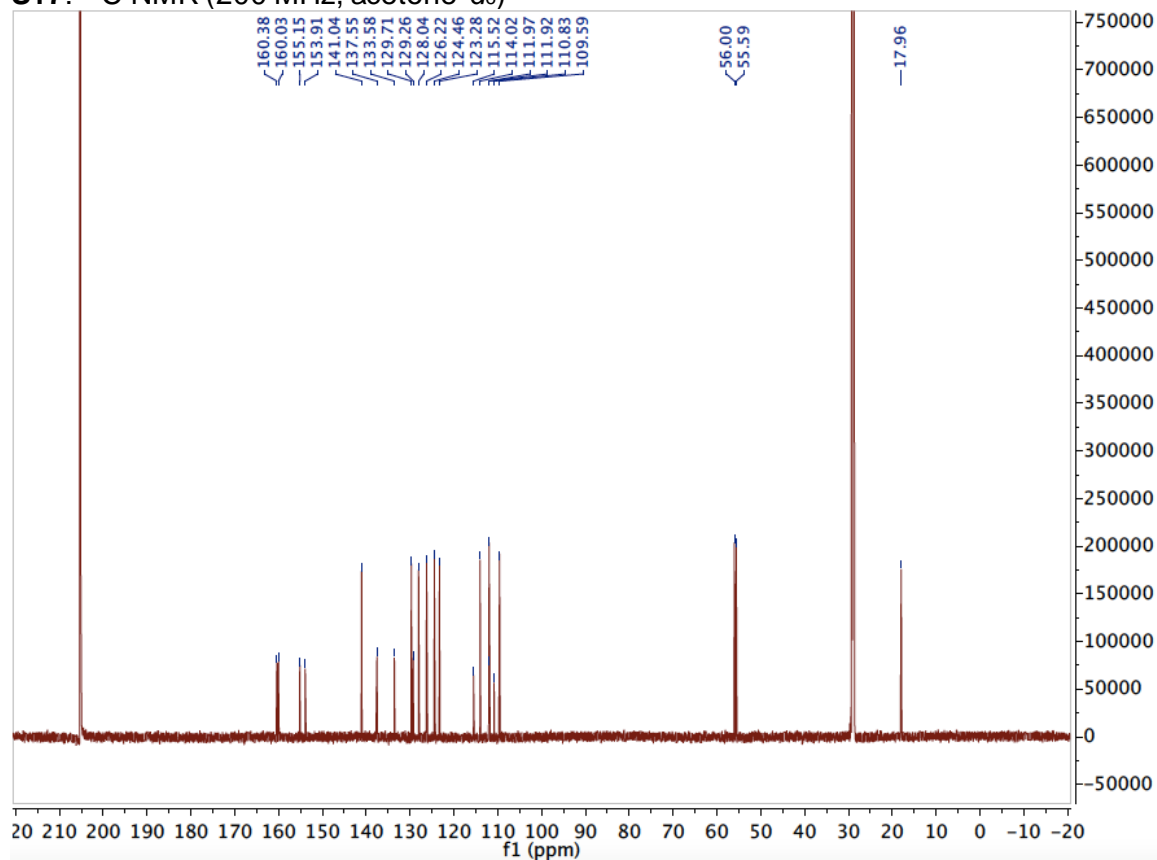

32: <sup>1</sup>H NMR (600 MHz, Methanol-*d*<sub>4</sub>)

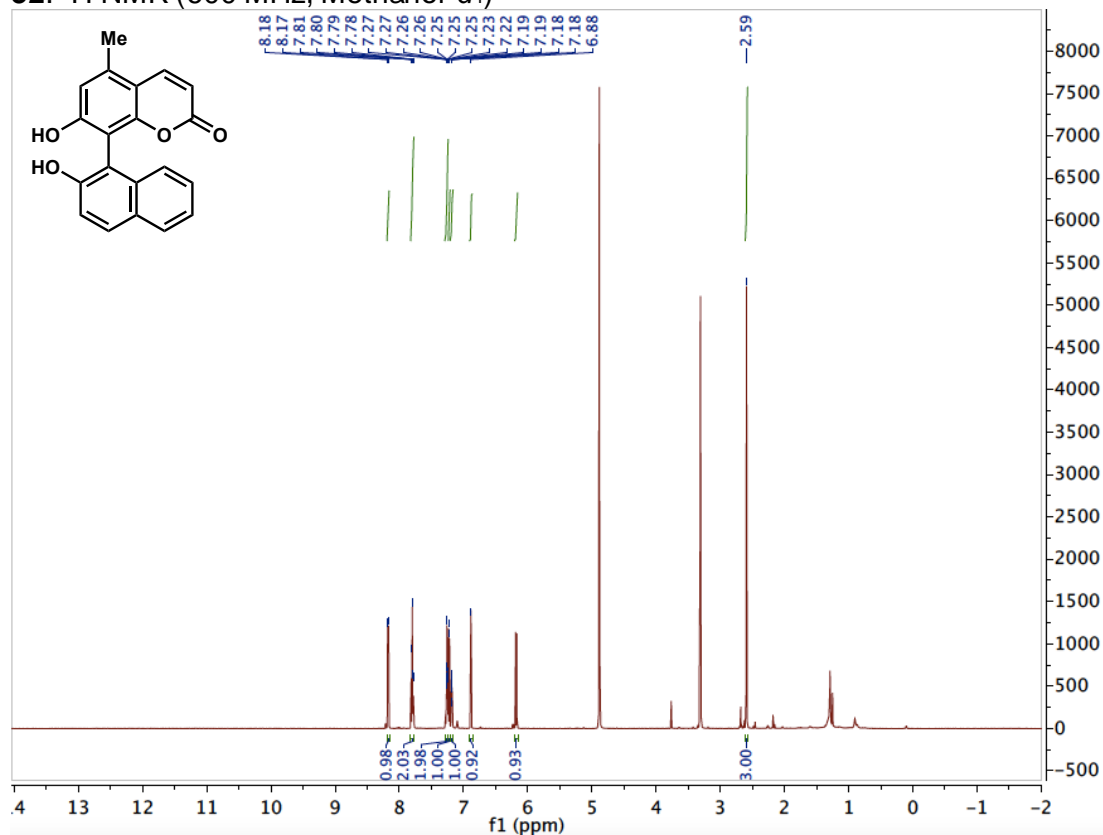

32: <sup>13</sup>C NMR (150 MHz, Methanol-*d*<sub>4</sub>)

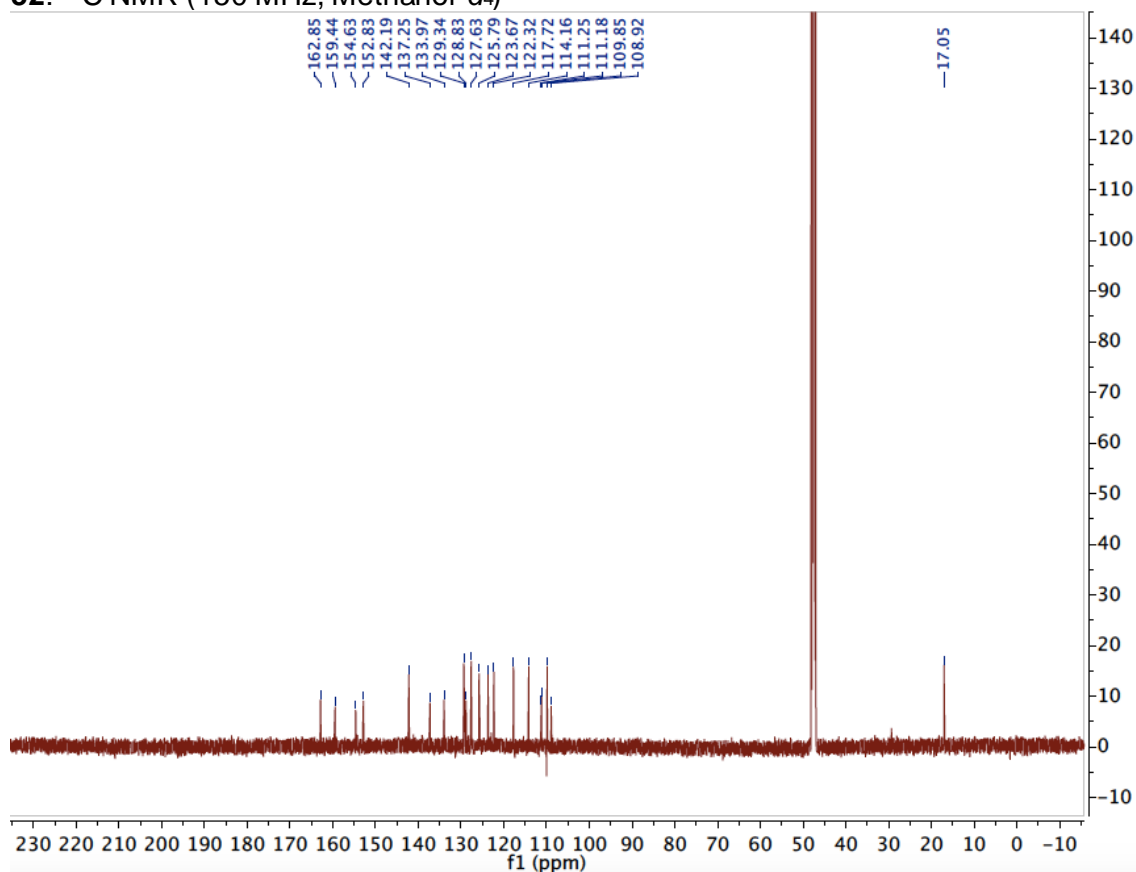

S19: <sup>1</sup>H NMR (600 MHz, (CDCl<sub>3</sub>))

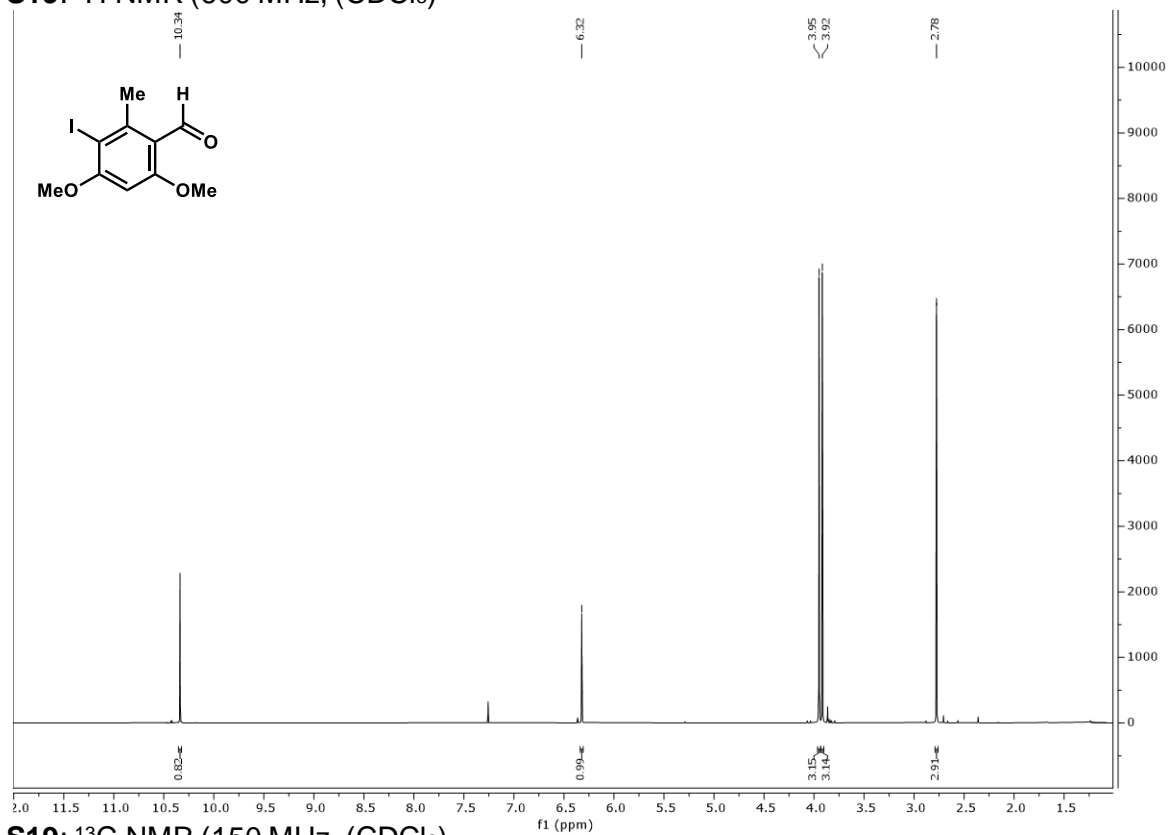

S19: <sup>13</sup>C NMR (150 MHz, (CDCl<sub>3</sub>))

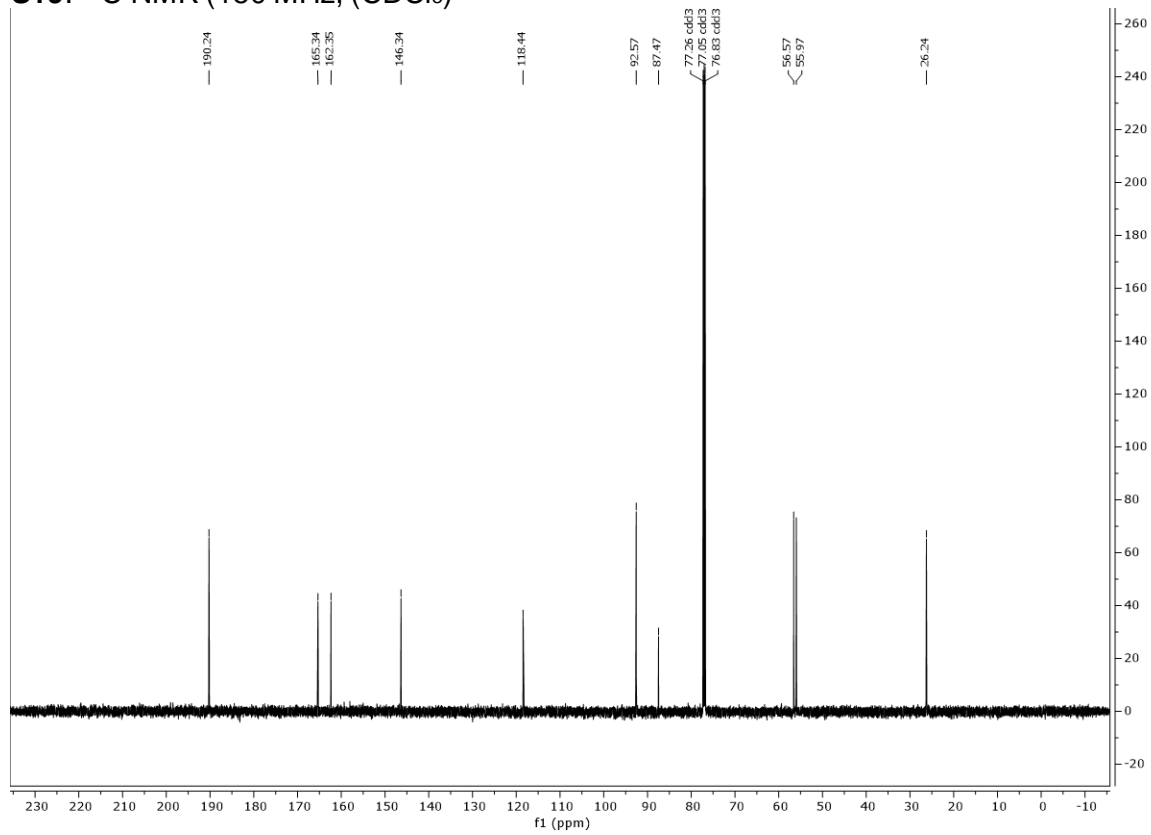



S20: <sup>1</sup>H NMR (600 MHz, (CDCl<sub>3</sub>))

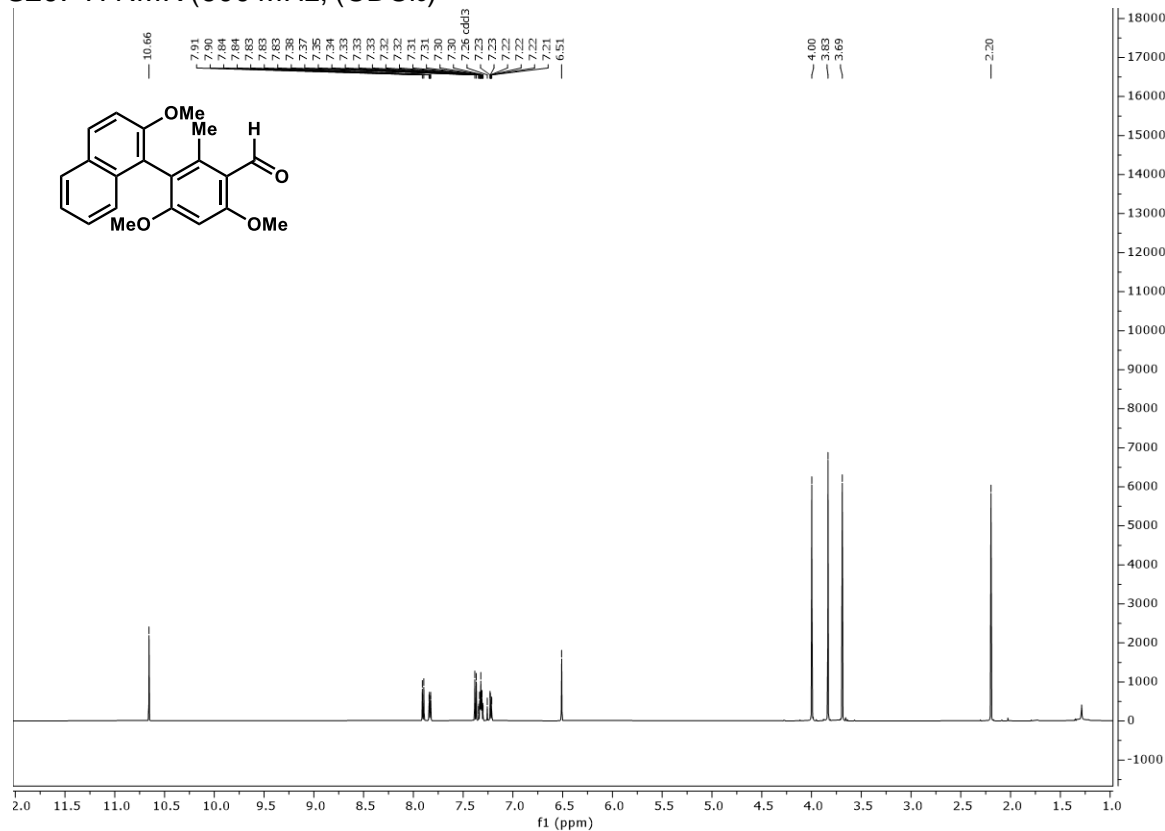

S20: <sup>13</sup>C NMR (150 MHz, (CDCl<sub>3</sub>))

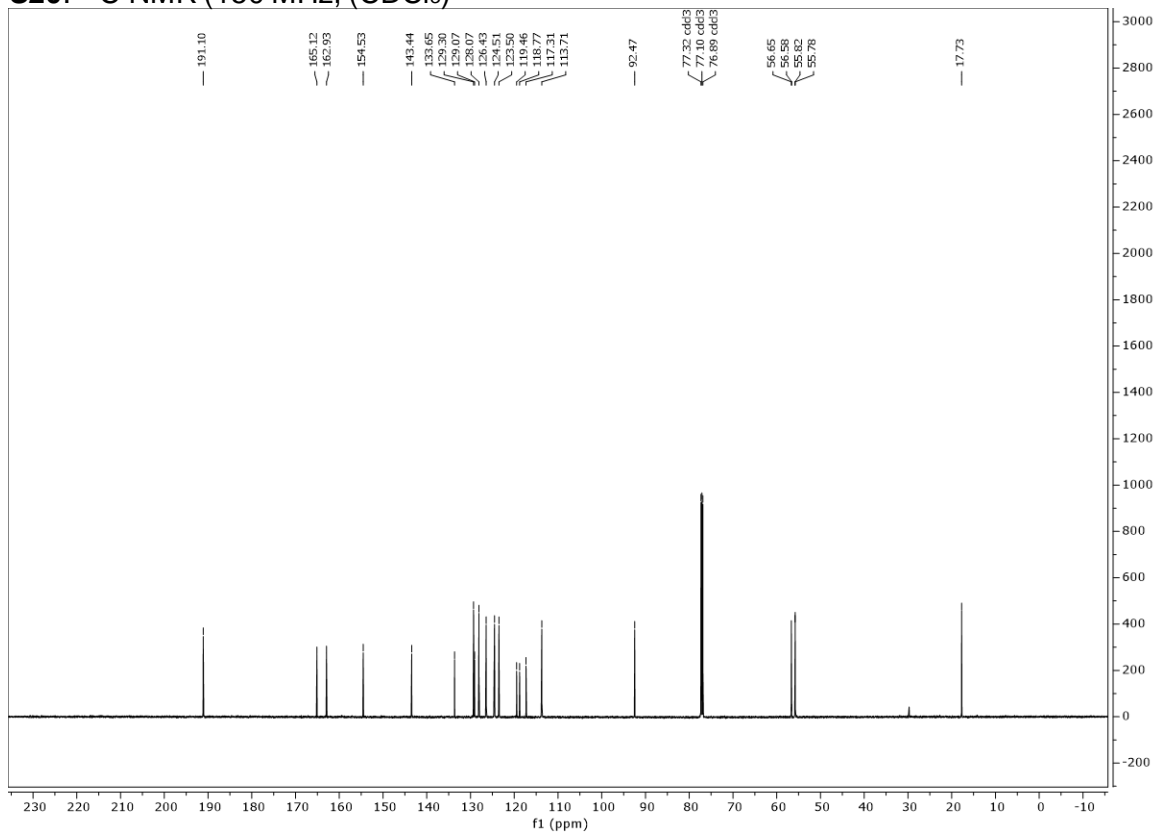

S21: <sup>1</sup>H NMR (600 MHz, (CDCl<sub>3</sub>))

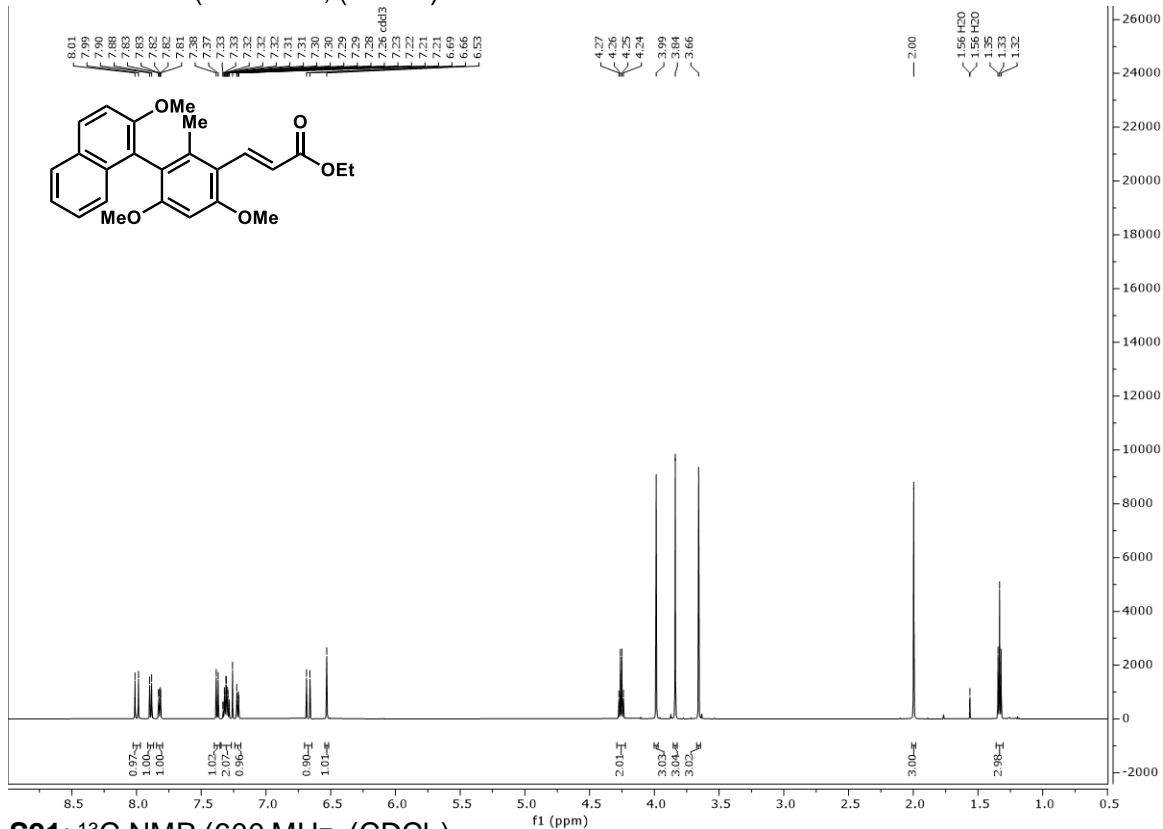

S21: <sup>13</sup>C NMR (600 MHz, (CDCl<sub>3</sub>))

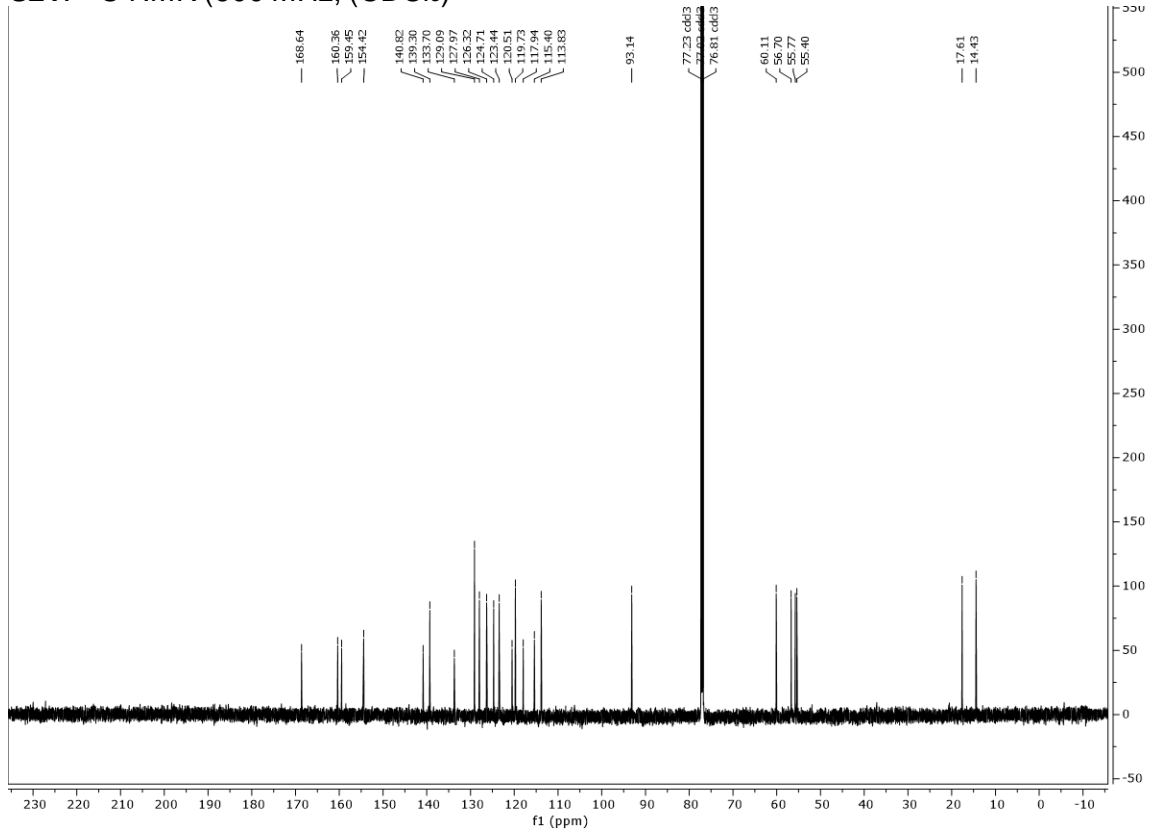

33: <sup>1</sup>H NMR (600 MHz, (CDCl<sub>3</sub>))

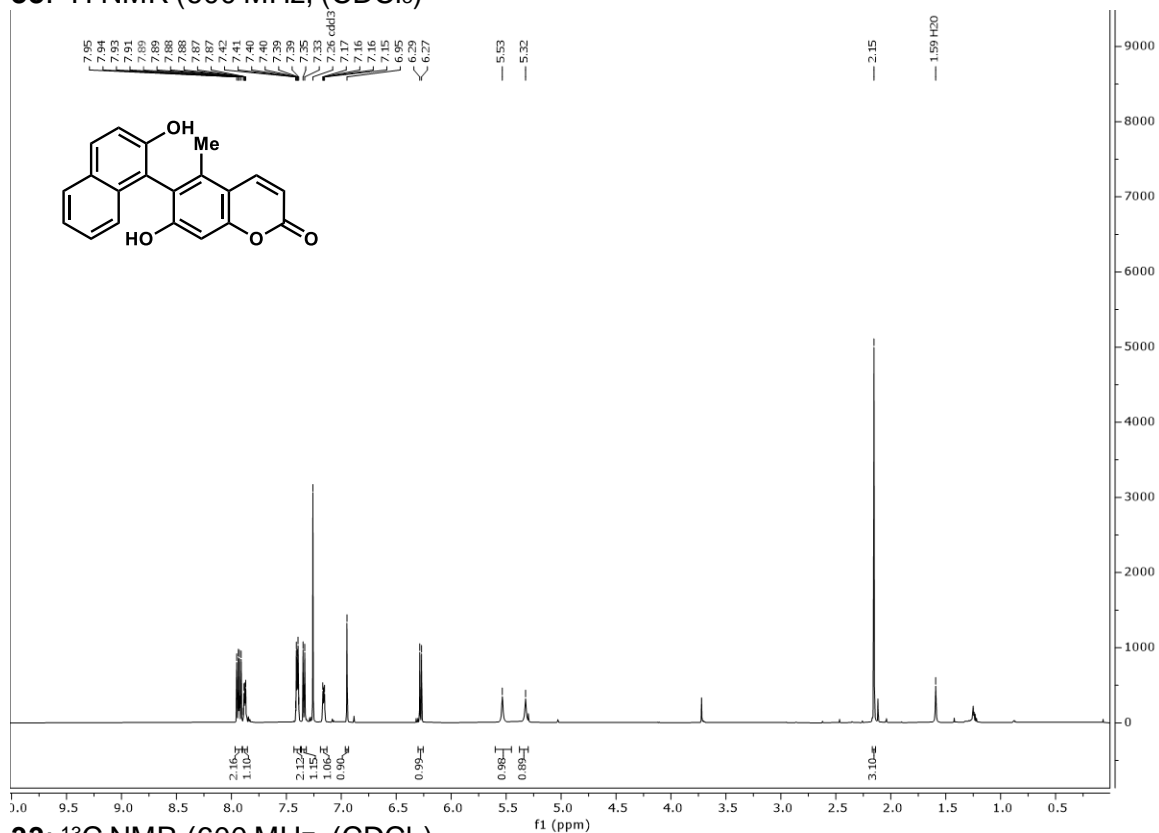

33: <sup>13</sup>C NMR (600 MHz, (CDCl<sub>3</sub>))

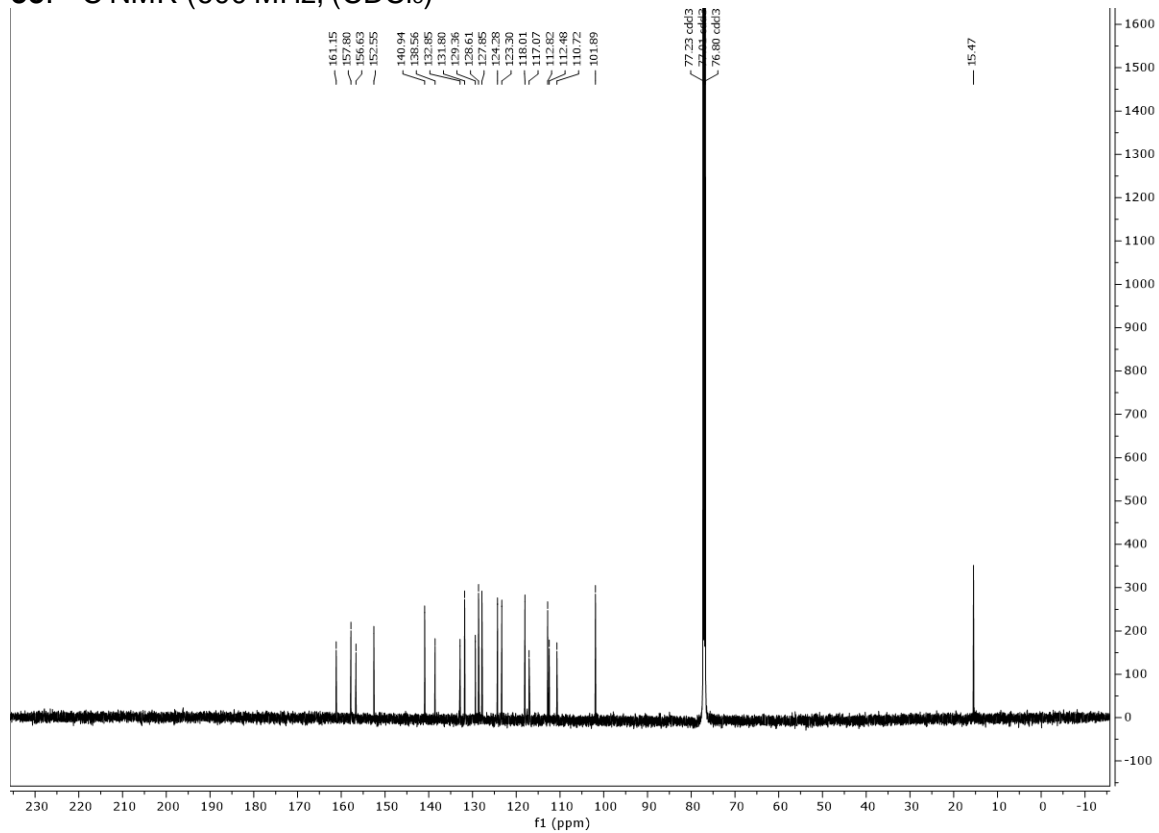

S22: <sup>1</sup>H NMR (600 MHz, CDCl<sub>3</sub>)

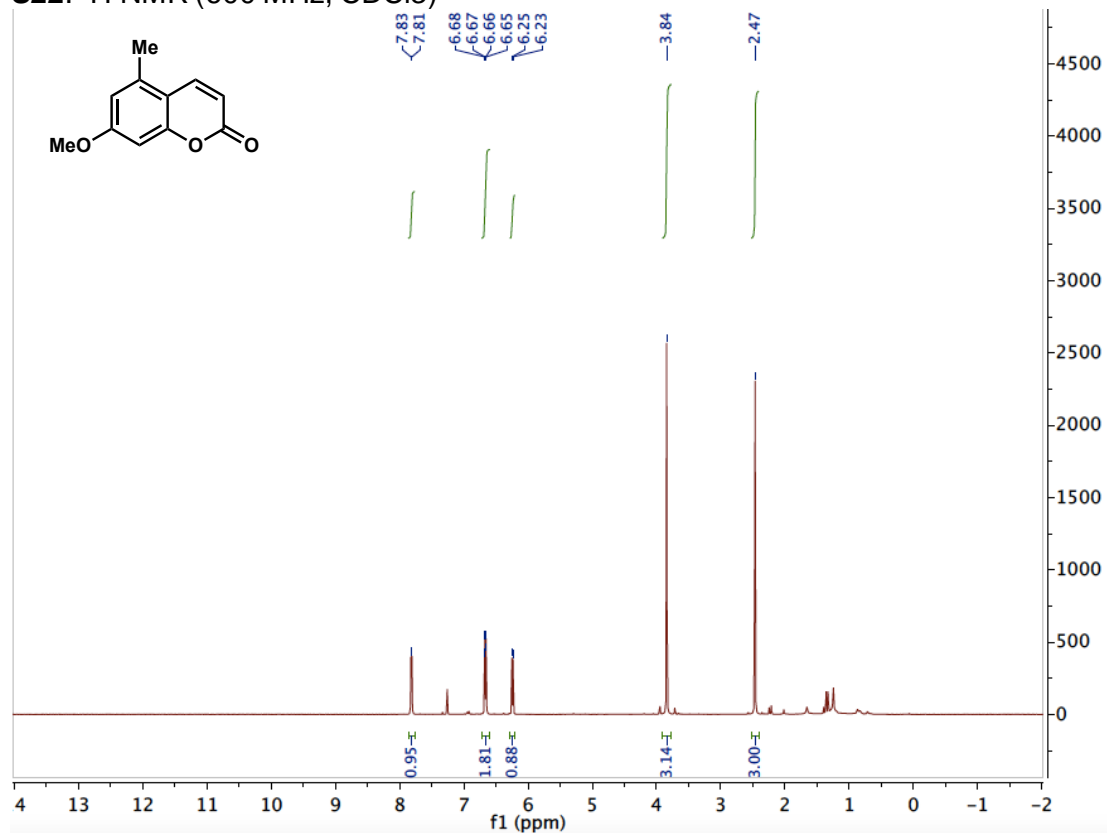

S22: <sup>13</sup>C NMR (150 MHz, CDCl<sub>3</sub>)

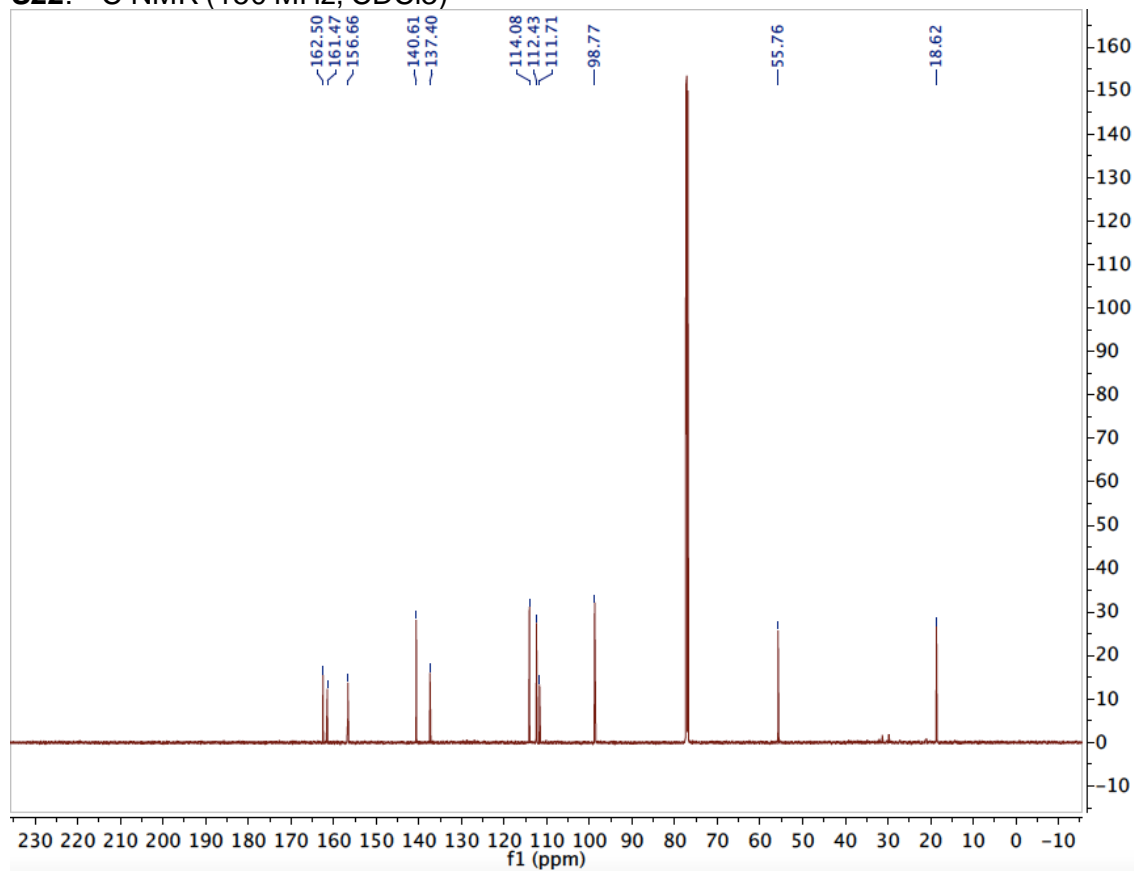

S23: <sup>1</sup>H NMR (600 MHz, CDCl<sub>3</sub>)

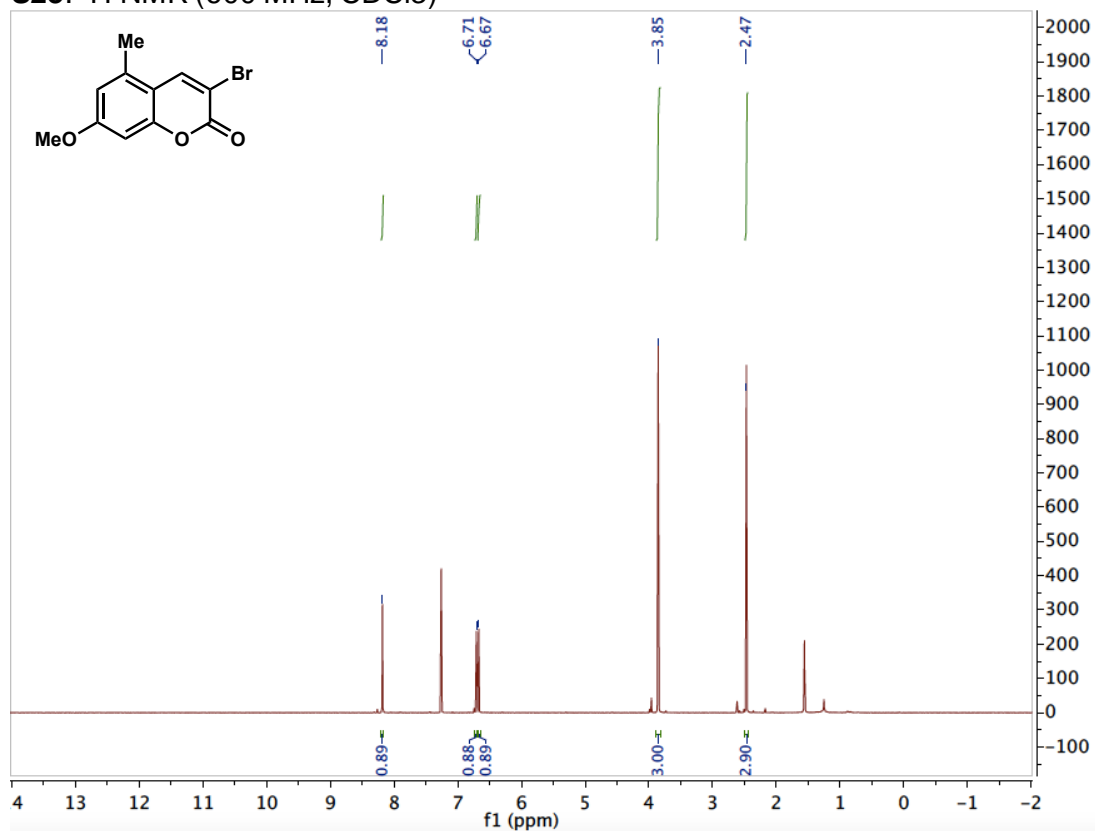

S23: <sup>13</sup>C NMR (150 MHz, CDCl<sub>3</sub>)

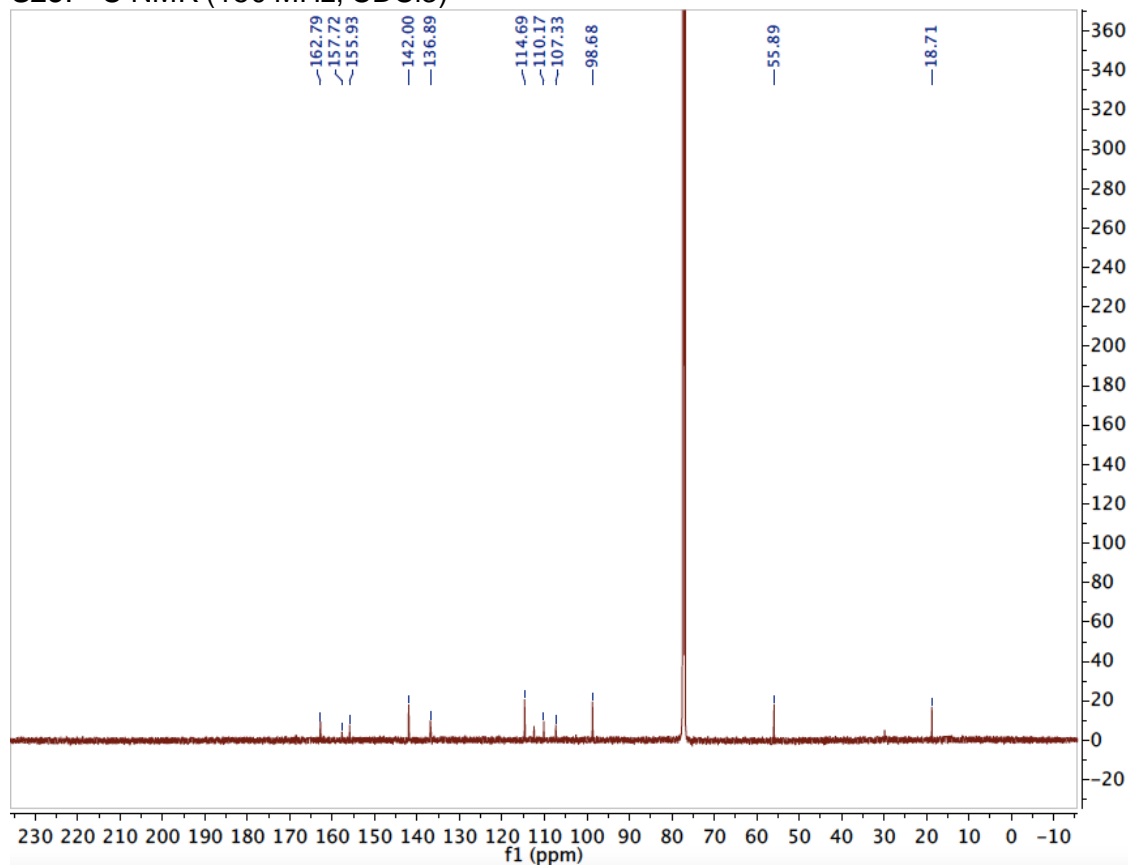

S24: <sup>1</sup>H NMR (600 MHz, CDCl<sub>3</sub>)

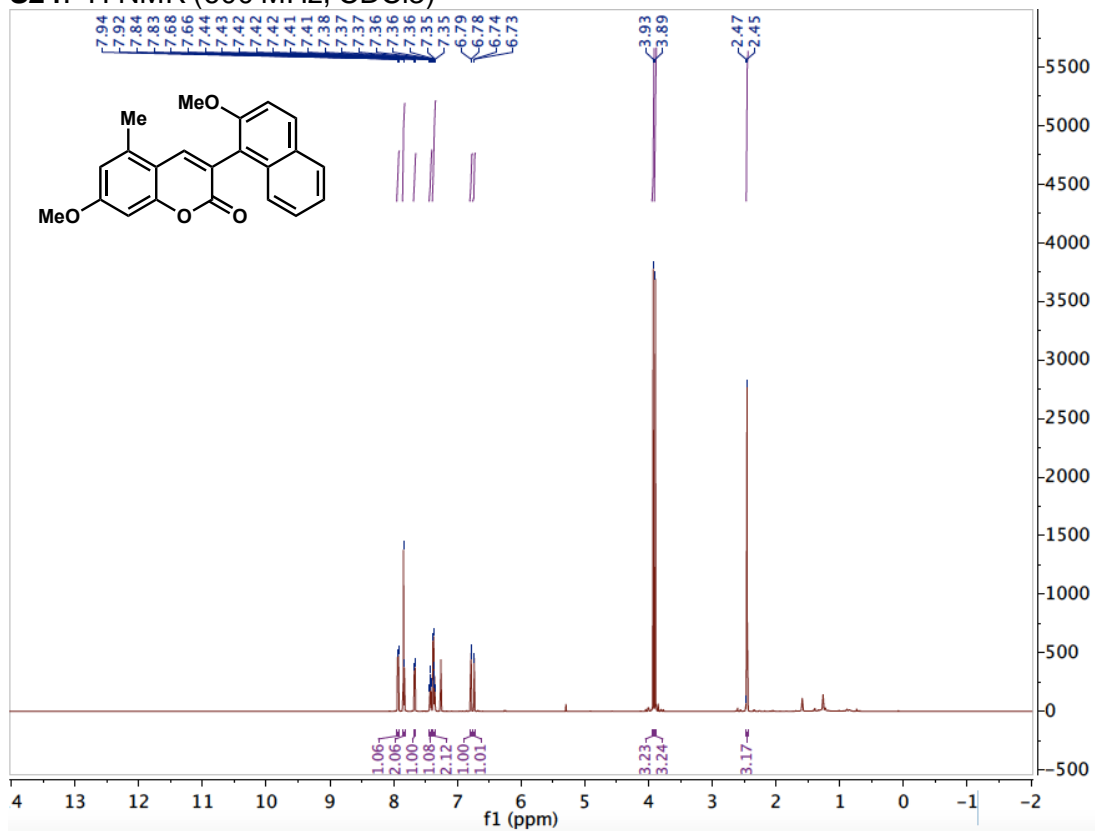

S24: <sup>13</sup>C NMR (150 MHz, CDCl<sub>3</sub>)

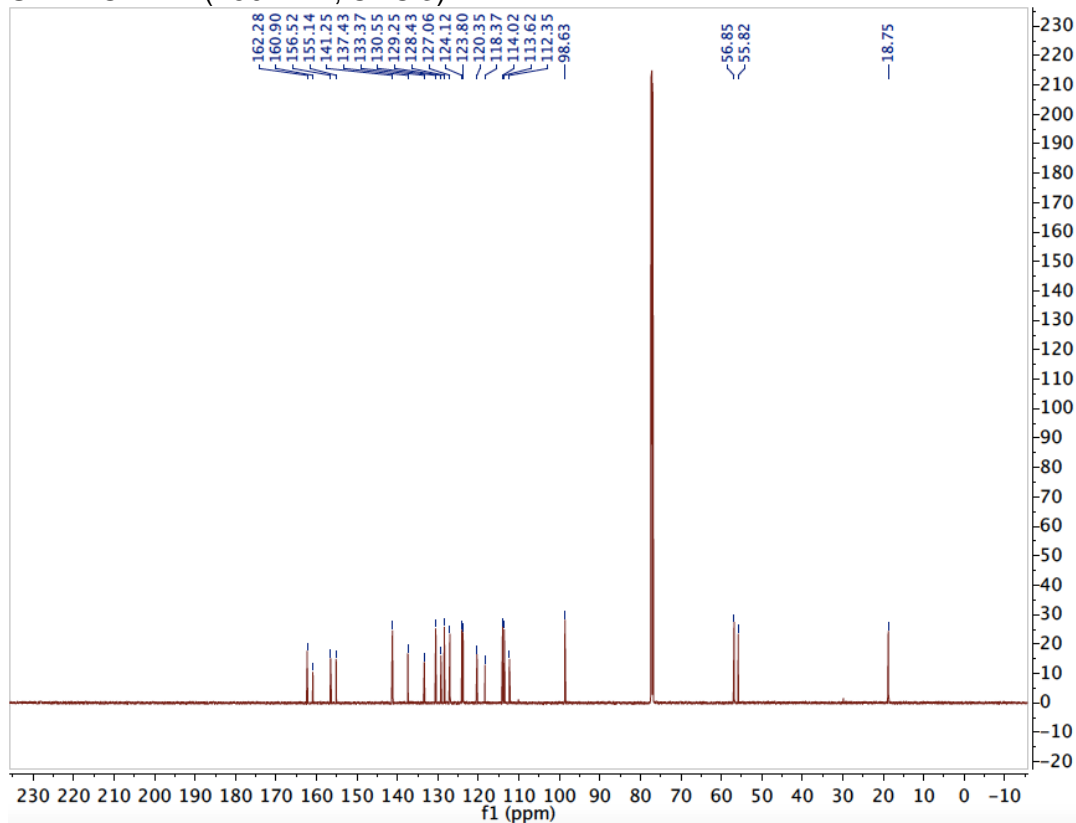

34: <sup>1</sup>H NMR (600 MHz, acetone-*d*<sub>6</sub>)

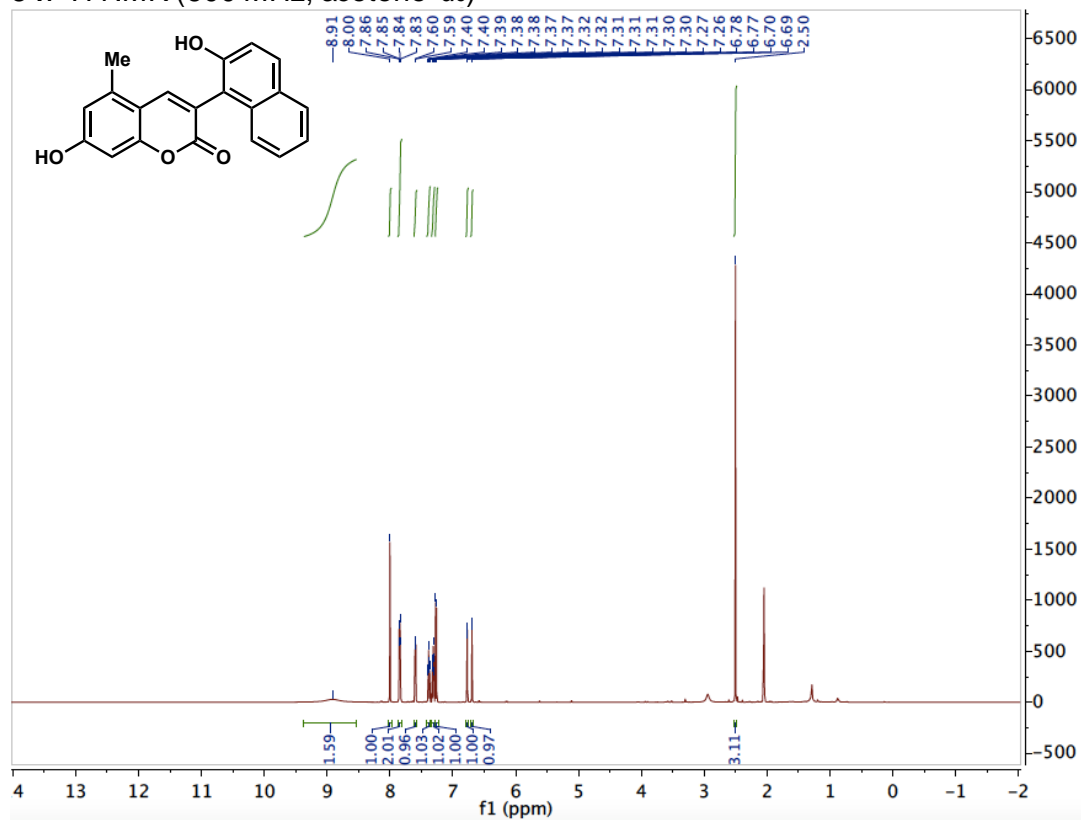

34: <sup>13</sup>C NMR (150 MHz, acetone-*d*<sub>6</sub>)

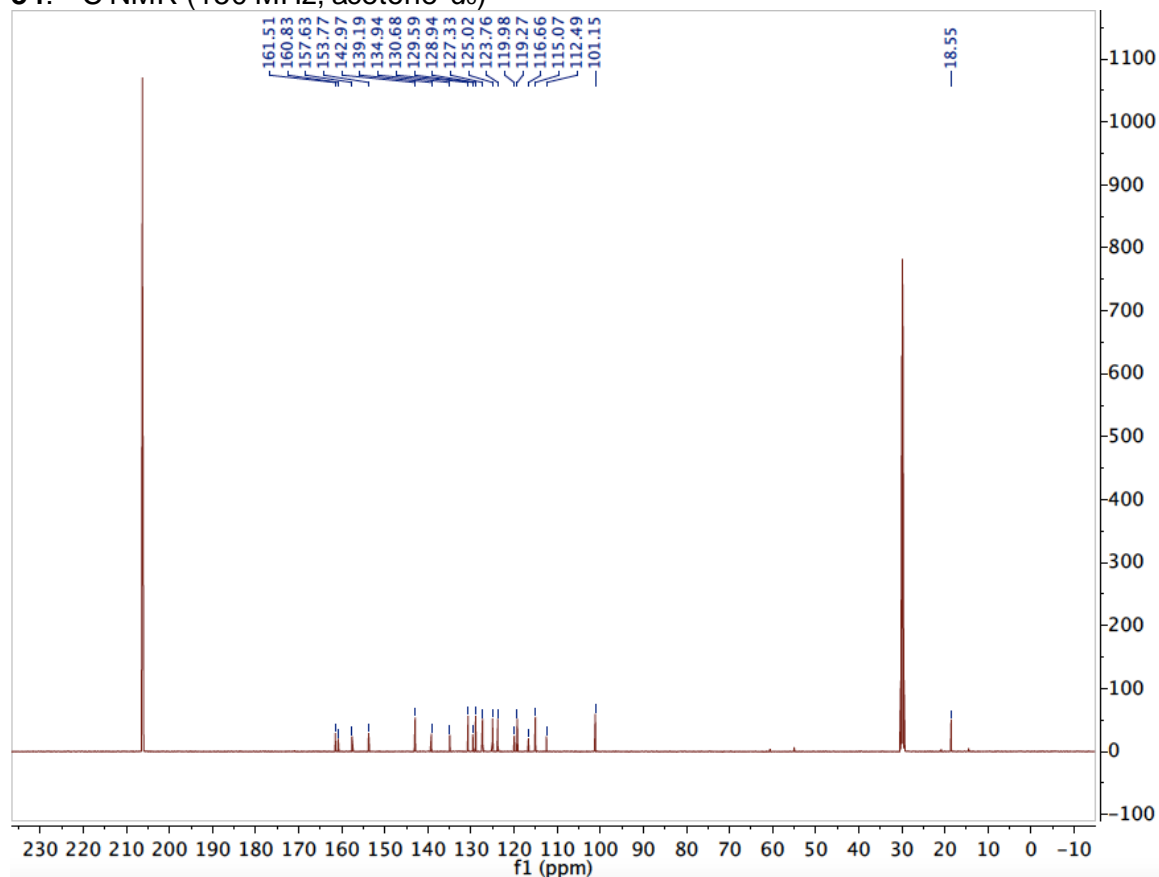

S25: <sup>1</sup>H NMR (600 MHz, CDCl<sub>3</sub>)

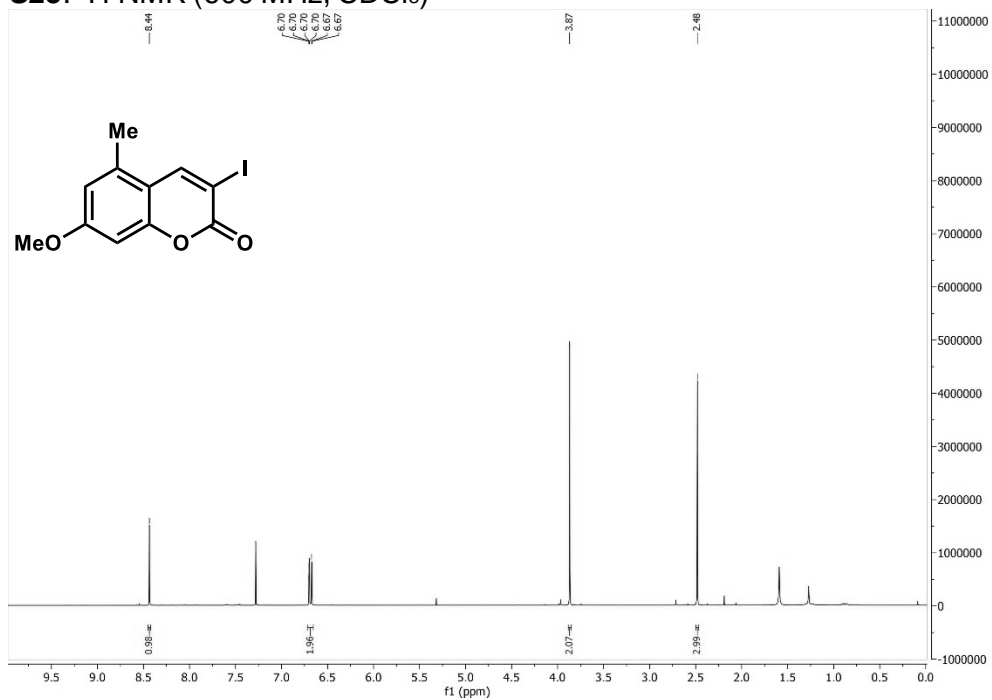

S25: <sup>13</sup>C NMR (150 MHz, CDCl<sub>3</sub>)

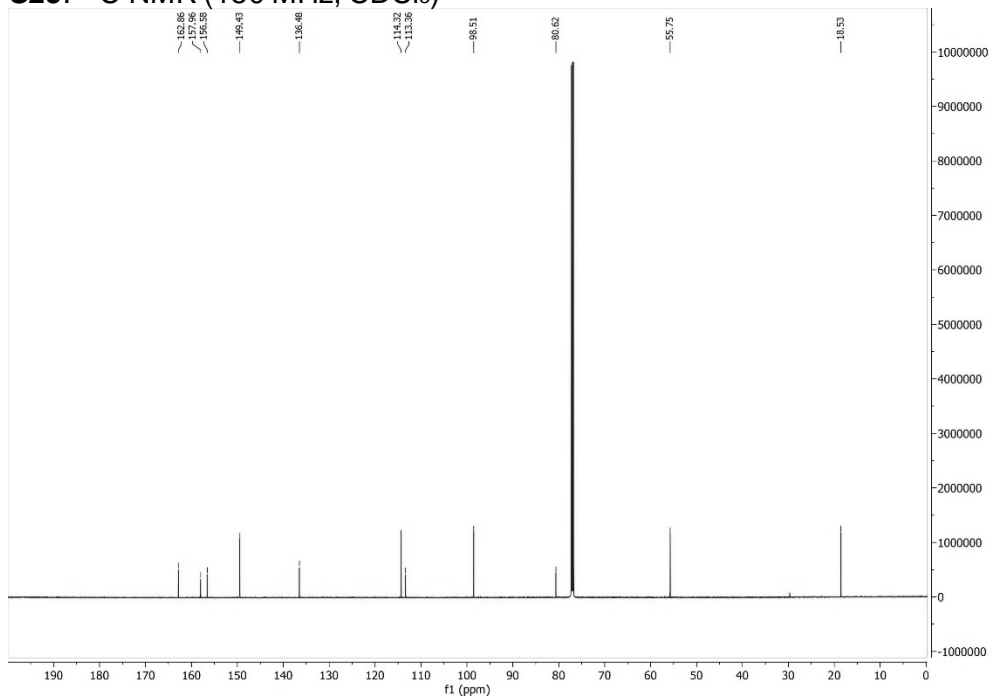



**S26: <sup>1</sup>H NMR (600 MHz, CDCl<sub>3</sub>)**

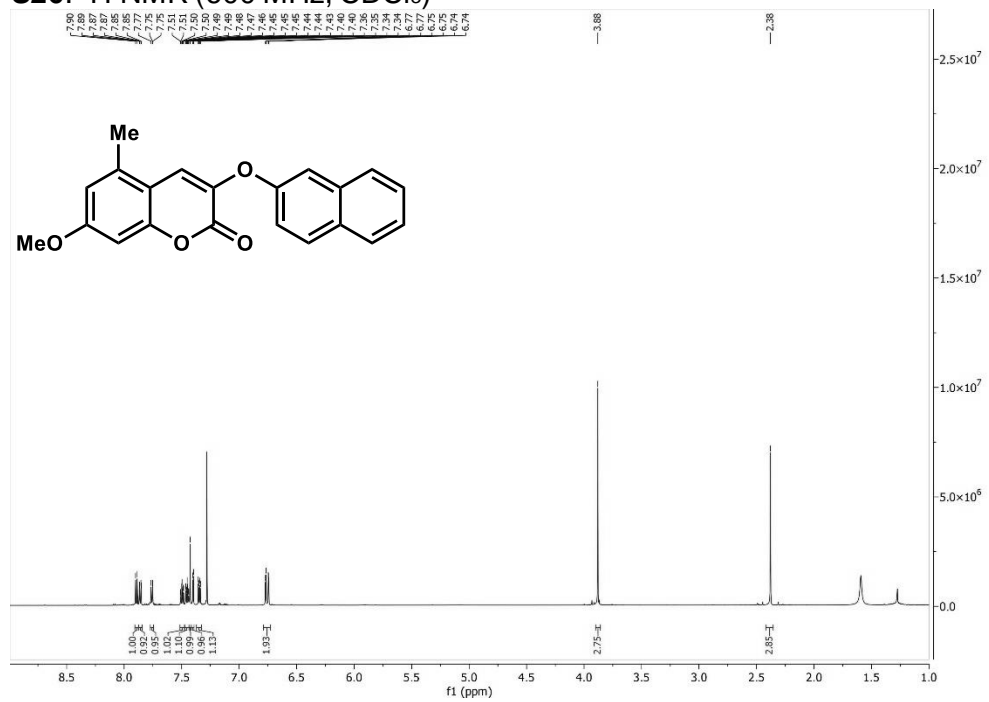

**S26: <sup>13</sup>C NMR (150 MHz, CDCl<sub>3</sub>)**

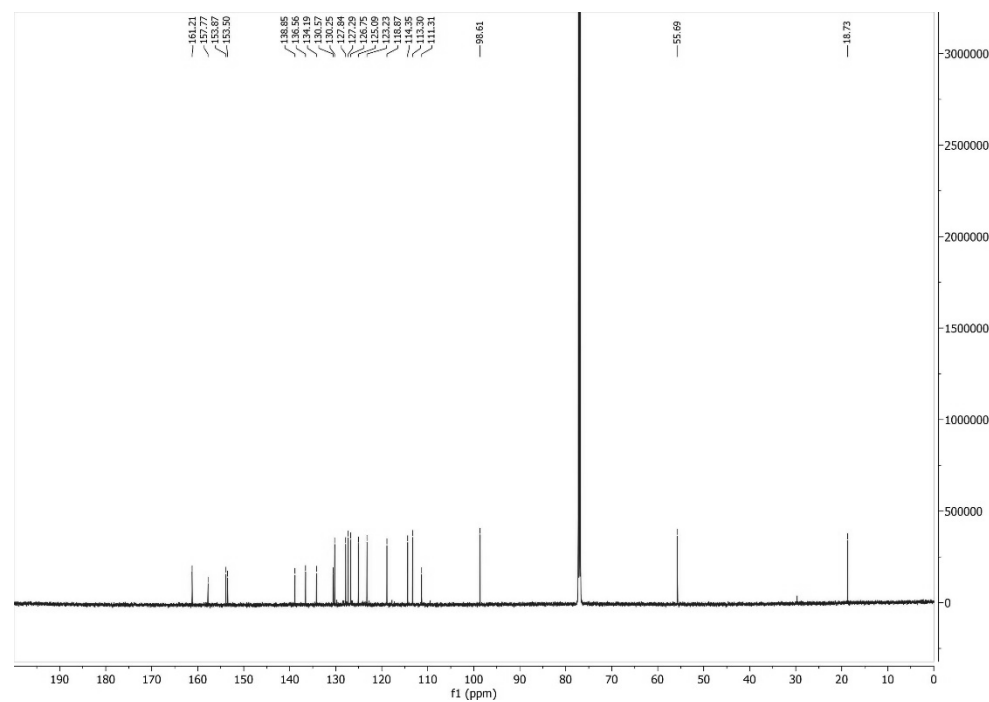

**35: <sup>1</sup>H NMR (800 MHz, DMSO-*d*<sub>6</sub>)**

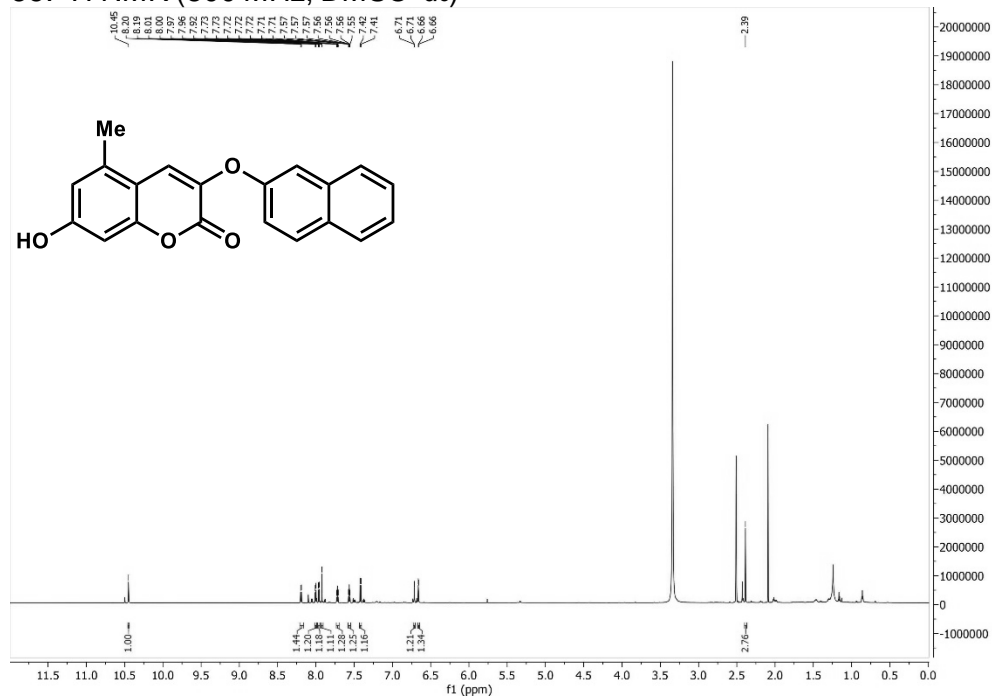

**35: <sup>13</sup>C NMR (200 MHz, DMSO-*d*<sub>6</sub>)**

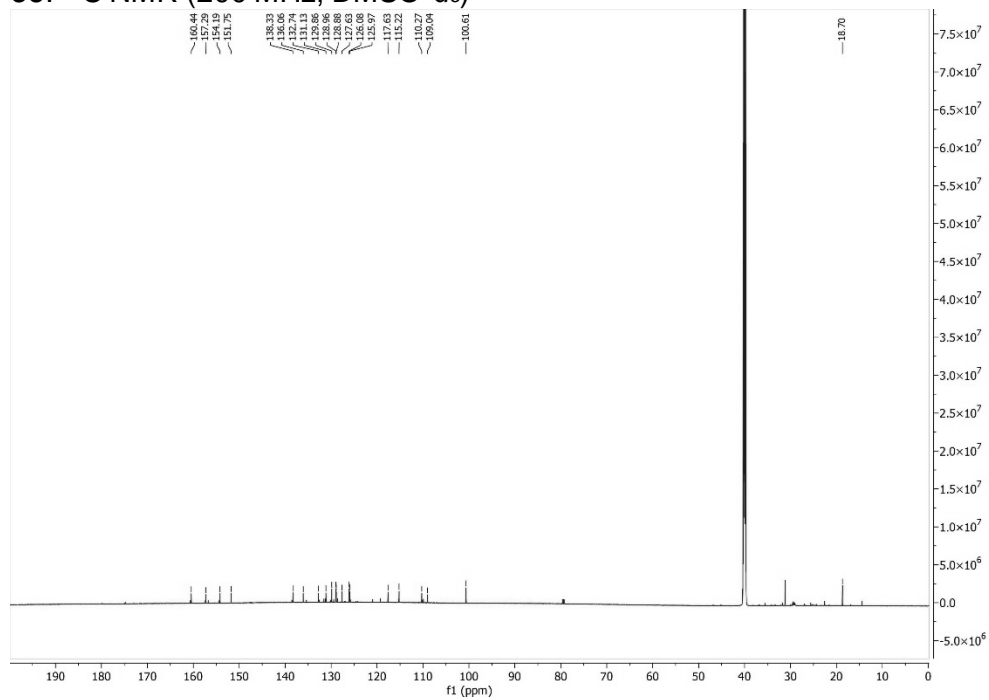

43: <sup>1</sup>H NMR (600 MHz, DMSO-d<sub>6</sub>)

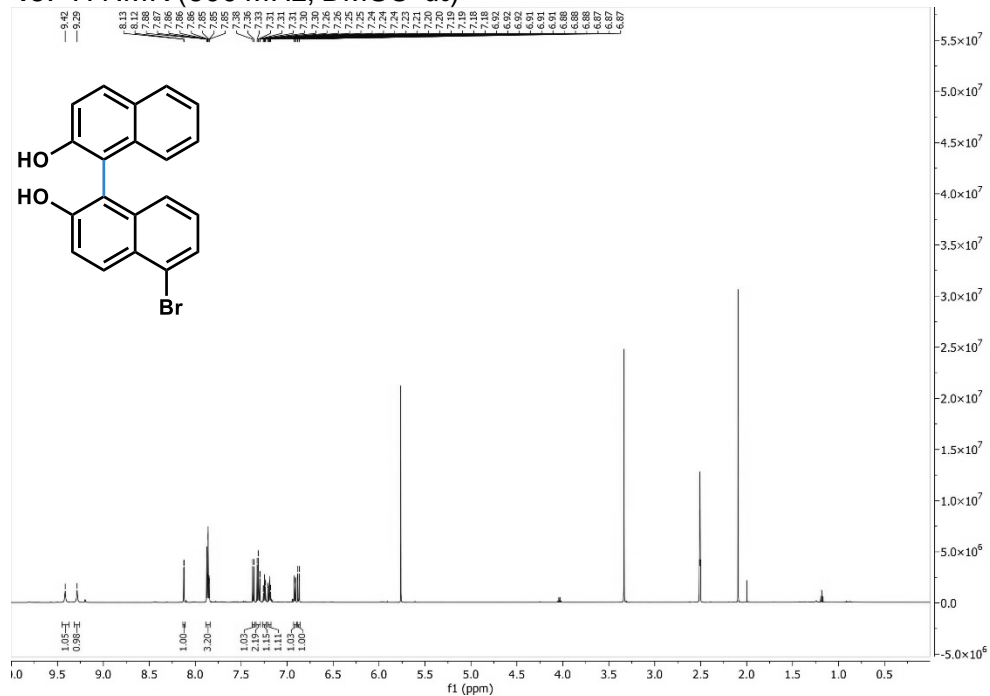

43: <sup>13</sup>C NMR (150 MHz, DMSO-d<sub>6</sub>)

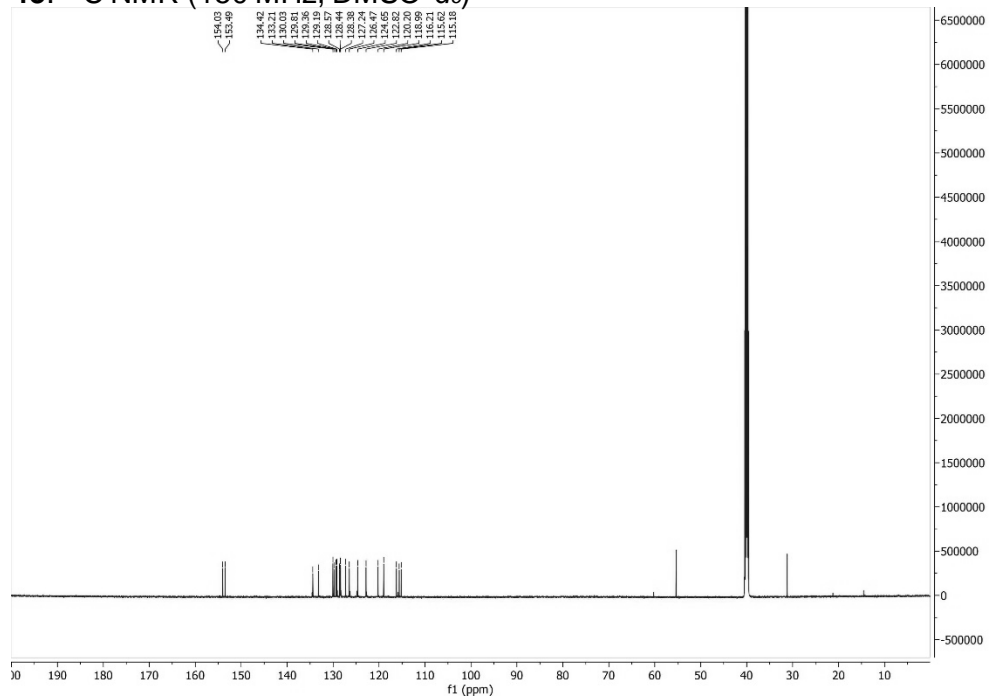

45: <sup>1</sup>H NMR (600 MHz, DMSO-*d*<sub>6</sub>)

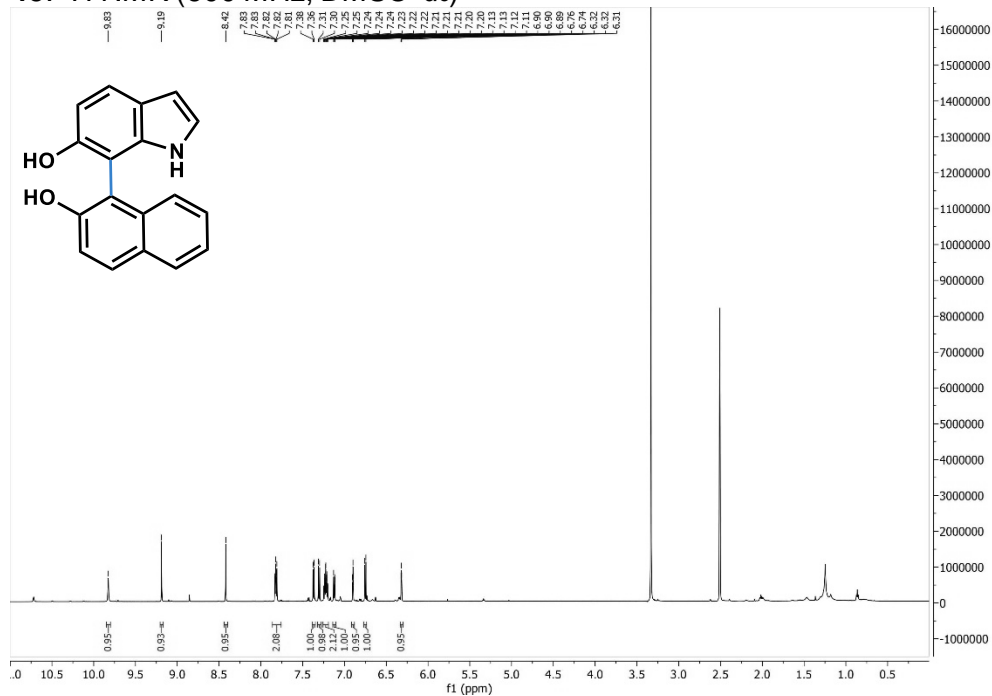

45: <sup>13</sup>C NMR (150 MHz, DMSO-*d*<sub>6</sub>)

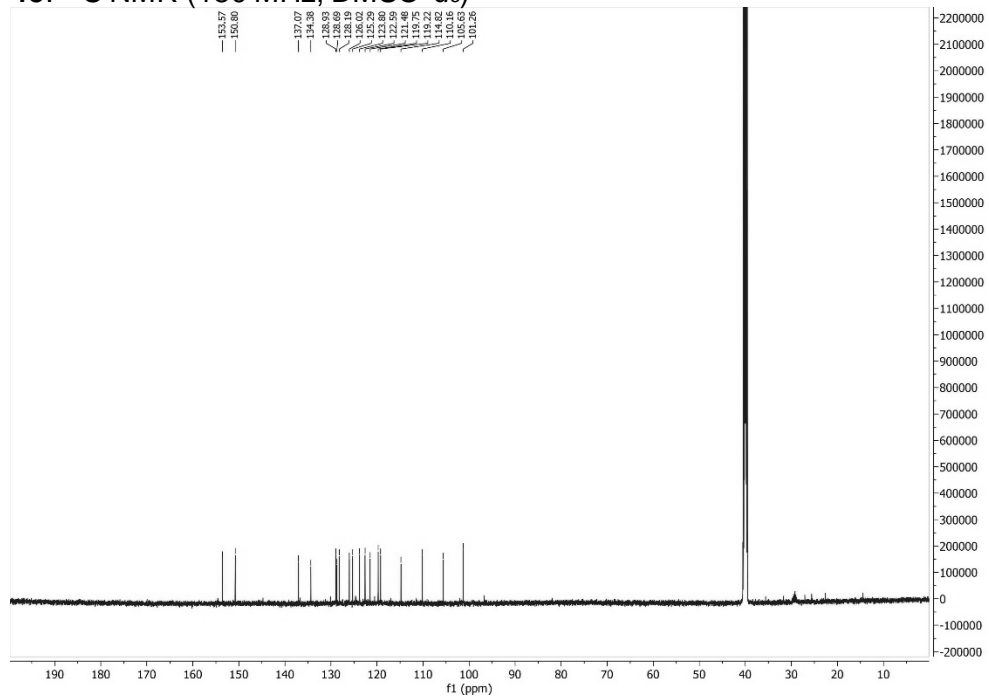

46: <sup>1</sup>H NMR (600 MHz, DMSO-d<sub>6</sub>)

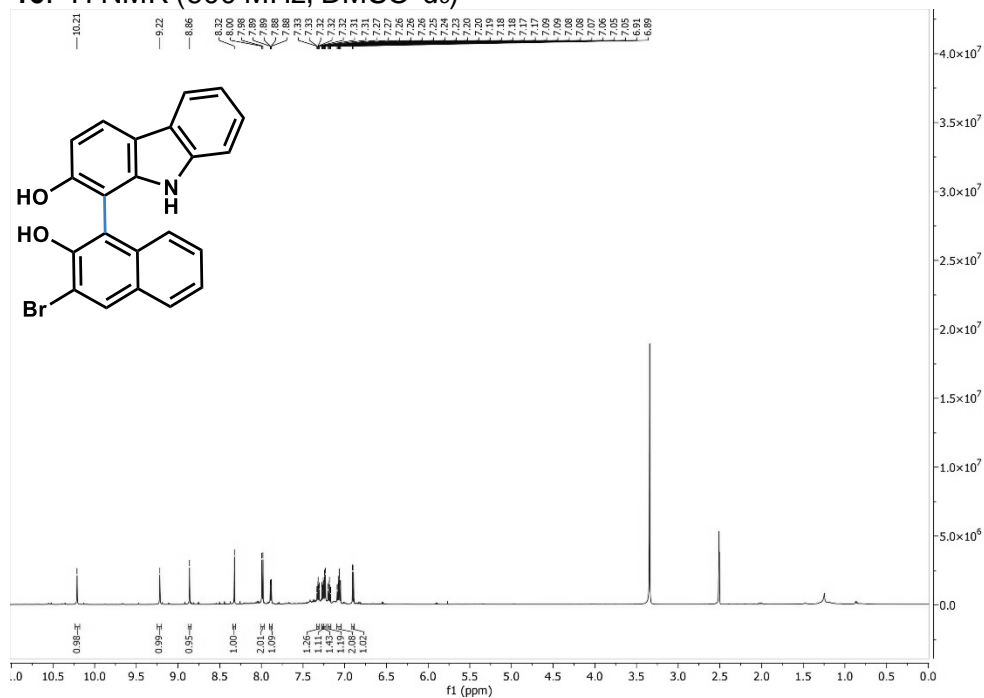

46: <sup>13</sup>C NMR (150 MHz, DMSO-d<sub>6</sub>)

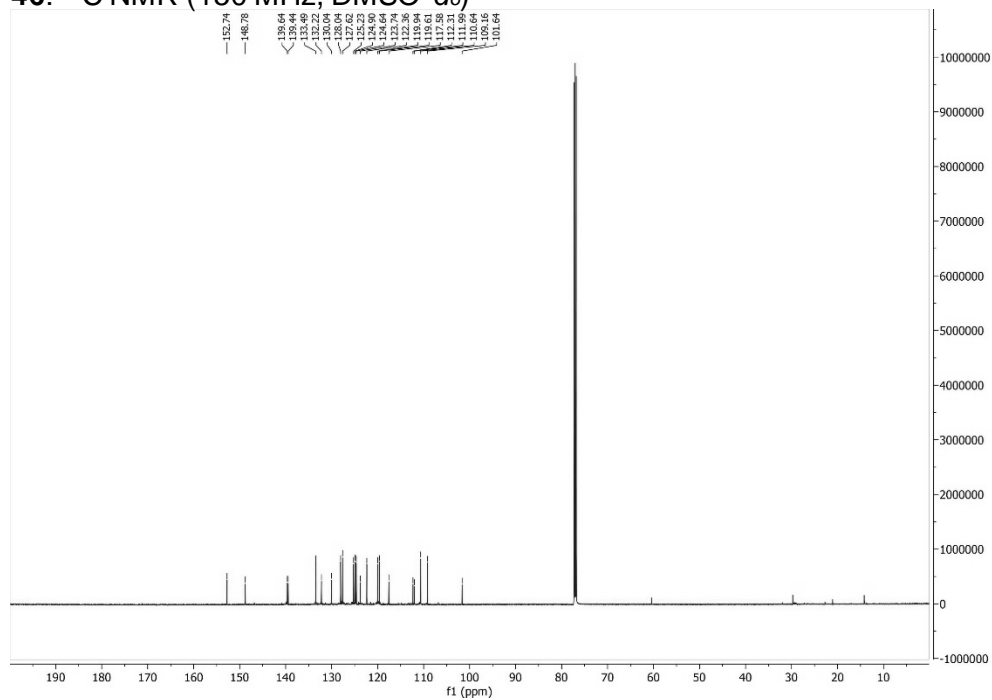

S32: <sup>1</sup>H NMR (600 MHz, CD<sub>3</sub>OD)

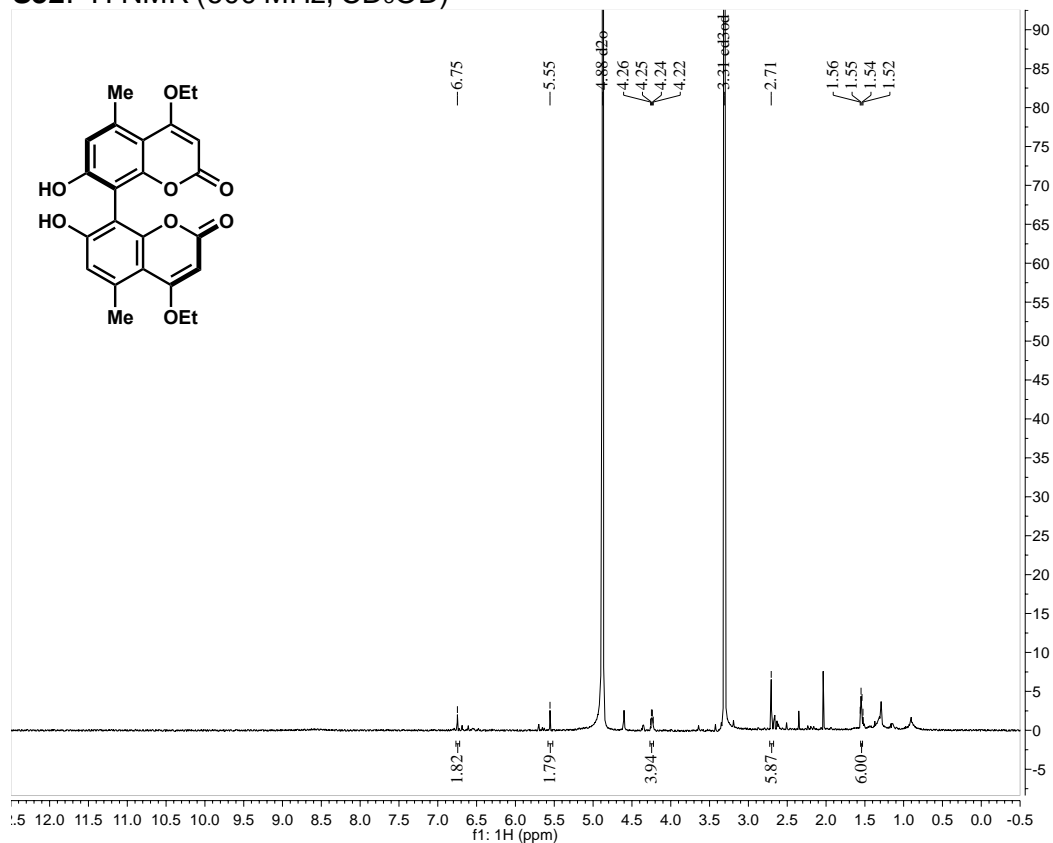

S32: <sup>1</sup>H NMR (600 MHz, acetone-d<sub>6</sub>)

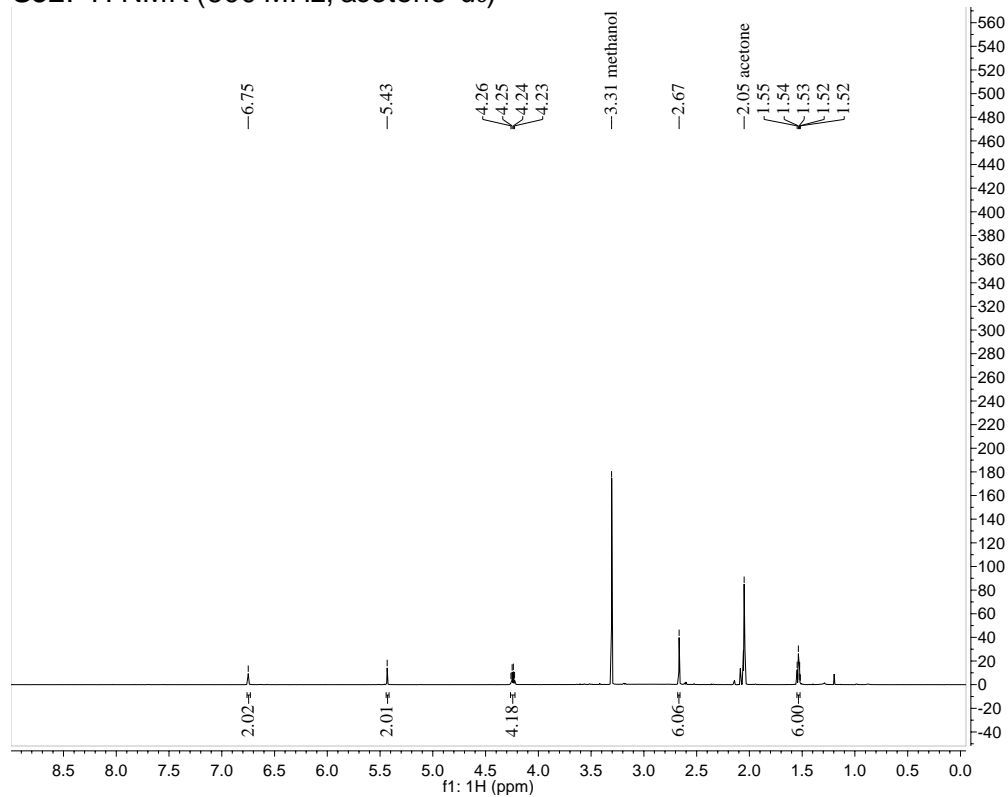

S32:  $^{13}\text{C}$  NMR (150 MHz, acetone- $d_6$ )

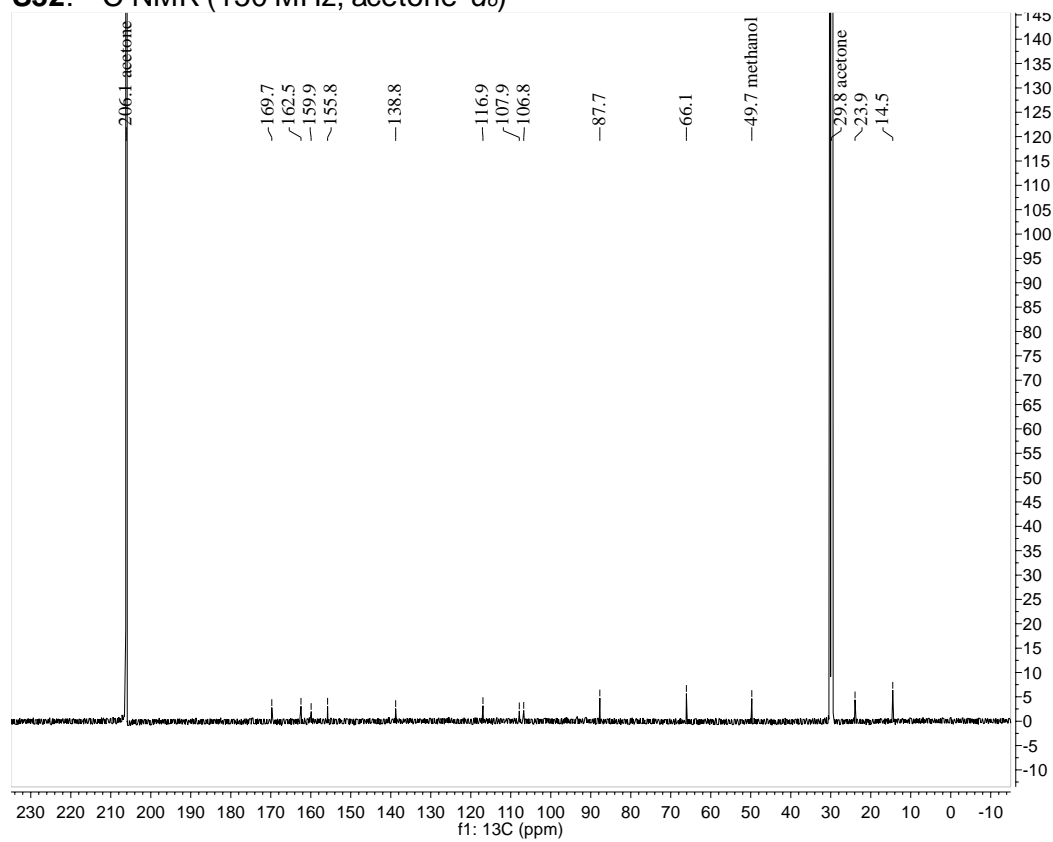

## IX. References

1. Hubbard, J. S. & Harris, T. M. Condensations at the 6 position of the methyl ester and the dimethylamide of 3, 5-dioxohexanoic acid via 2, 4, 6-trianions. *J. Org. Chem.* **46**, 2566-2570 (1981).
2. Gil Girol, C. *et al.* Regio- and stereoselective oxidative phenol coupling in *Aspergillus niger*. *Angew. Chem. Int. Ed.* **51**, 9788-9791 (2012).
3. Xie, S.-S. *et al.* Multi-target tacrine-coumarin hybrids: cholinesterase and monoamine oxidase B inhibition properties against Alzheimer's disease. *Eur. J. Med. Chem.* **95**, 153-165 (2015).
4. Cao, J.-L., Shen, S.-L., Yang, P. & Qu, J. A catalyst-free one-pot construction of skeletons of 5-methoxyseselin and alloxanthoxyletin in water. *Org. Lett.* **15**, 3856-3859 (2013).
5. Pandey, G., Muralikrishna, C. & Bhalerao, U. Mushroom tyrosinase catalysed synthesis of coumestans, bebzofuranderivatives and related heterocyclic compounds. *Tetrahedron* **45**, 6867-6874 (1989).
6. Chaudhuri, D. *et al.* Metal - free OLED triplet emitters by side - stepping Kasha' s rule. *Angew. Chem. Int. Ed.* **52**, 13449-13452 (2013).
7. Conradt, D., Hermann, B., Gerhardt, S., Einsle, O. & Müller, M. Biocatalytic properties and structural analysis of phloroglucinol reductases. *Angew. Chem. Int. Ed.* **55**, 15531-15534 (2016).
8. Linusson, A. *et al.* Statistical molecular design, parallel synthesis, and biological evaluation of a library of thrombin inhibitors. *J. Med. Chem.* **44**, 3424-3439 (2001).
9. Cutler, H. G. *et al.* Orlandin: a nontoxic fungal metabolite with plant growth inhibiting properties. *J. Agric. Food Chem.* **27**, 592-595 (1979).
10. Nozawa, K., Seyea, H., Nakajima, S., Udagawa, S.-i. & Kawai, K.-i. Studies on fungal products. Part 10. Isolation and structures of novel bicoumarins, desertorins A, B, and C, from *Emericella desertorum*. *J. Chem. Soc.*, 1735-1738 (1987).
11. Laakso, J. A., Narske, E. D., Gloer, J. B., Wicklow, D. T. & Dowd, P. F. Isokotanins AC: new bicoumarins from the sclerotia of *Aspergillus alliceus*. *J. Nat. Prod.* **57**, 128-133 (1994).
12. Devji, T. *et al.* Pancreatic anticancer activity of a novel geranylgeranylated coumarin derivative. *Bioorg. Med. Chem. Lett.* **21**, 5770-5773 (2011).
13. Dubuffet, T., Loutz, A. & Lavielle, G. An efficient large scale synthesis of coumarins by a dealkylative boron-mediated ring closure of 3-(ortho-methoxyaryl) propenoic esters. *Syn. Comm.* **29**, 929-936 (1999).
14. Leonetti, F. *et al.* Design, synthesis, and 3D QSAR of novel potent and selective aromatase inhibitors. *J. Med. Chem.* **47**, 6792-6803 (2004).
15. Maiti, D. & Buchwald, S. L. Cu-catalyzed arylation of phenols: synthesis of sterically hindered and heteroaryl diaryl ethers. *J. Org. Chem.* **75**, 1791-1794 (2010).
16. Qu, S., Greenhalgh, M. D. & Smith, A. D. Isothiourea-catalysed regioselective acylative kinetic resolution of axially chiral biaryl diols. *Chem. Eur. J.* (2019).
17. Li, Y. & Li, Q. Photochemically reversible and thermally stable axially chiral diarylethene switches. *Org. Lett.* **14**, 4362-4365 (2012).
18. Yang, Y., Lan, J. & You, J. Oxidative C–H/C–H coupling reactions between two (hetero)arenes. *Chem. Rev.* **117**, 8787-8863 (2017).
19. Noji, M., Nakajima, M. & Koga, K. A new catalytic system for aerobic oxidative coupling of 2-naphthol derivatives by the use of CuCl-amine complex: a practical synthesis of binaphthol derivatives. *Tet. Lett.* **35**, 7983-7984 (1994).
20. Nakajima, M. Synthesis and application of novel biaryl compounds with axial chirality as catalysts in enantioselective reactions. *Yakugaku Zasshi* **120**, 68-75 (2000).
21. Wu, X. *et al.* Asymmetric synthesis of gonytolide A: strategic use of an aryl halide blocking group for oxidative coupling. *J. Am. Chem. Soc.* **140**, 5969-5975 (2018).
22. Feldman, K. S. & Ensel, S. M. Ellagitannin chemistry. Preparative and mechanistic studies of the biomimetic oxidative coupling of galloyl esters. *J. Am. Chem. Soc.* **116**, 3357-3366 (1994).



23. Langeslay, R. R. *et al.* Catalytic applications of vanadium: a mechanistic perspective. *Chem. Rev.* **119**, 2128-2191 (2018).
24. Hirao, T. Vanadium in modern organic synthesis. *Chem. Rev.* **97**, 2707-2724 (1997).
25. Libman, A. *et al.* Synthetic and predictive approach to unsymmetrical biphenols by iron-catalyzed chelated radical–anion oxidative coupling. *J. Am. Chem. Soc.* **137**, 11453-11460 (2015).
26. Shalit, H., Libman, A. & Pappo, D. *meso*-Tetraphenylporphyrin iron chloride catalyzed selective oxidative cross-coupling of phenols. *J. Am. Chem. Soc.* **139**, 13404-13413 (2017).
27. Lee, Y. E., Cao, T., Torruellas, C. & Kozlowski, M. C. Selective oxidative homo- and cross-coupling of phenols with aerobic catalysts. *J. Am. Chem. Soc.* **136**, 6782-6785 (2014).
28. Effenberger, I. *et al.* Dirigent proteins from cotton (*Gossypium* sp.) for the atropselective synthesis of gossypol. *Angew. Chem. Int. Ed.* **54**, 14660-14663 (2015).
29. Hu, J., Li, H. & Chooi, Y.-H. Fungal dirigent protein controls the stereoselectivity of multicopper oxidase-catalyzed phenol coupling in viriditoxin biosynthesis. *J. Am. Chem. Soc.* **141**, 8068-8072 (2019).
30. Obermaier, S., Thiele, W., Fürtges, L. & Müller, M. Enantioselective phenol coupling by laccases in the biosynthesis of fungal dimeric naphthopyrones. *Angew. Chem. Int. Ed.* **58**, 9125-9128 (2019).
31. Mazzaferro, L. S., Huttel, W., Fries, A. & Müller, M. Cytochrome P450-catalyzed regio- and stereoselective phenol coupling of fungal natural products. *J. Am. Chem. Soc.* **137**, 12289-12295 (2015).
32. Obermaier, S. & Müller, M. Biaryl-forming enzymes from *Aspergilli* exhibit substrate-dependent stereoselectivity. *Biochemistry* **58**, 2589-2593 (2019).
33. Thiele, W., Froede, R., Steglich, W. & Müller, M. Enzymatic formation of rufoschweinitzin, a binaphthalene from the basidiomycete *Cortinarius rufolivaceus*. *ChemBioChem* **21**, 1423-1427 (2020).
34. Griffiths, S. *et al.* Elucidation of cladofulvin biosynthesis reveals a cytochrome P450 monooxygenase required for anthraquinone dimerization. *Proc. Natl. Acad. Sci.* **113**, 6851 (2016).
35. Matsuda, Y., Gottfredsen, C. H. & Larsen, T. O. Genetic characterization of neosartorin biosynthesis provides insight into heterodimeric natural product generation. *Org. Lett.* **20**, 7197-7200 (2018).
36. Präg, A. *et al.* Regio- and stereoselective intermolecular oxidative phenol coupling in *Streptomyces*. *J. Am. Chem. Soc.* **136**, 6195-6198 (2014).
37. Funa, N., Funabashi, M., Ohnishi, Y. & Horinouchi, S. Biosynthesis of hexahydroxyperylenequinone melanin via oxidative aryl coupling by cytochrome P-450 in *Streptomyces griseus*. *J. Bacteriol.* **187**, 8149-8155 (2005).
38. Zhao, B. *et al.* Different binding modes of two flaviolin substrate molecules in cytochrome P450 158A1 (CYP158A1) compared to CYP158A2. *Biochemistry* **46**, 8725-8733 (2007).
39. Zhao, B. *et al.* Binding of two flaviolin substrate molecules, oxidative coupling, and crystal structure of *Streptomyces coelicolor* A3 (2) cytochrome P450 158A2. *J. Biol. Chem.* **280**, 11599-11607 (2005).
40. Lim, Y.-R. *et al.* Characterization of a biflaviolin synthase CYP158A3 from *Streptomyces avermitilis* and its role in the biosynthesis of secondary metabolites. *Biomol. Ther.* **25**, 171-176 (2017).
41. Gerlt, J. A. *et al.* Enzyme Function Initiative-Enzyme Similarity Tool (EFI-EST): a web tool for generating protein sequence similarity networks. *Biochim. Biophys. Acta.* **1854**, 1019-1037 (2015).
42. Zallot, R., Oberg, N. & Gerlt, J. A. The EFI web resource for genomic enzymology tools: leveraging protein, genome, and metagenome databases to discover novel enzymes and metabolic pathways. *Biochemistry* **58**, 4169-4182 (2019).
43. Zallot, R., Oberg, N. O. & Gerlt, J. A. 'Democratized' genomic enzymology web tools for functional assignment. *Curr. Opin. Chem. Biol.* **47**, 77-85 (2018).

44. Shannon, P. *et al.* Cytoscape: A software environment for integrated models of biomolecular interaction networks. *Genome Res.* **13**, 2498-2504 (2003).
45. Gietz, R. D. & Woods, R. A. Transformation of yeast by lithium acetate/single-stranded carrier DNA/polyethylene glycol method. *Meth. Enzymol.* **350**, 87-96 (2002).
46. Madden, K., Tolstorukov, I. & Cregg, J. in *Genetic Transformation Systems in Fungi, Volume 1* 87-91 (Springer, 2015).
47. Guengerich, F. P., Martin, M. V., Sohl, C. D. & Cheng, Q. Measurement of cytochrome P450 and NADPH–cytochrome P450 reductase. *Nat. Prot.* **4**, 1245-1251 (2009).
48. Sherer, E. C. *et al.* Systematic approach to conformational sampling for assigning absolute configuration using vibrational circular dichroism. *J. Med. Chem.* **57**, 477-494 (2014).
49. Liu, Z. *et al.* Highly enantioselective synthesis of anti aryl  $\beta$ -hydroxy  $\alpha$ -amino esters via DKR transfer hydrogenation. *Tet. Lett.* **52**, 1685-1688 (2011).
50. Joyce, L. A. *et al.* Beyond optical rotation: what's left is not always right in total synthesis. *Chem. Sci.* **9**, 415-424 (2018).
51. Petersson, a. *et al.* A complete basis set model chemistry. I. The total energies of closed - shell atoms and hydrides of the first - row elements. *J. Chem. Phys.* **89**, 2193-2218 (1988).
52. Petersson, G. & Al - Laham, M. A. A complete basis set model chemistry. II. Open - shell systems and the total energies of the first - row atoms. *J. Chem. Phys.* **94**, 6081-6090 (1991).
53. Rassolov, V. A., Pople, J. A., Ratner, M. A. & Windus, T. L. 6-31G\* basis set for atoms K through Zn. *J. Chem. Phys.* **109**, 1223-1229 (1998).
54. Rassolov, V. A., Ratner, M. A., Pople, J. A., Redfern, P. C. & Curtiss, L. A. 6 - 31G\* basis set for third - row atoms. *J. Comp. Chem.* **22**, 976-984 (2001).
55. Francl, M. M. *et al.* Self - consistent molecular orbital methods. XXIII. A polarization - type basis set for second - row elements. *J. Chem. Phys.* **77**, 3654-3665 (1982).
56. Hehre, W. J., Ditchfield, R. & Pople, J. A. Self—consistent molecular orbital methods. XII. Further extensions of Gaussian—type basis sets for use in molecular orbital studies of organic molecules. *J. Chem. Phys.* **56**, 2257-2261 (1972).
57. Becke, A. D. A new mixing of Hartree - Fock and local density - functional theories. *J. Chem. Phys.* **98**, 1372-1377 (1993).
58. Lee, C., Yang, W. & Parr, R. G. Development of the Colle-Salvetti correlation-energy formula into a functional of the electron density. *Phys. Rev. B* **37**, 785 (1988).
59. Miehlich, B., Savin, A., Stoll, H. & Preuss, H. Results obtained with the correlation energy density functionals of Becke and Lee, Yang and Parr. *Chem. Phys. Lett.* **157**, 200-206 (1989).
60. Gaussian 09, Revision A.02 (Gaussian, Inc., Wallingford, CT, 2009).
61. Yanai, T., Tew, D. P. & Handy, N. C. A new hybrid exchange–correlation functional using the Coulomb-attenuating method (CAM-B3LYP). *Chem. Phys. Lett.* **393**, 51-57 (2004).
62. Marenich, A. V., Cramer, C. J. & Truhlar, D. G. Performance of SM6, SM8, and SMD on the SAMPL1 test set for the prediction of small-molecule solvation free energies. *J. Phys. Chem. B* **113**, 4538-4543 (2009).
63. Clark, T., Chandrasekhar, J., Spitznagel, G. W. & Schleyer, P. V. R. Efficient diffuse function - augmented basis sets for anion calculations. III. The 3 - 21+ G basis set for first - row elements, Li-F. *J. Comp. Chem.* **4**, 294-301 (1983).
64. Bauernschmitt, R. & Ahlrichs, R. Treatment of electronic excitations within the adiabatic approximation of time dependent density functional theory. *Chem. Phys. Lett.* **256**, 454-464 (1996).
65. Bruhn, T., Schaumlöffel, A., Hemberger, Y. & Bringmann, G. SpecDis: Quantifying the comparison of calculated and experimental electronic circular dichroism spectra. *Chirality* **25**, 243-249 (2013).

66. Mazzeo, G. *et al.* Absolute configurations of fungal and plant metabolites by chiroptical methods. ORD, ECD, and VCD studies on phyllostin, scytolide, and oxysporone. *J. Nat. Prod.* **76**, 588-599 (2013).
67. CYLview 1.0b (Université de Sherbrooke, <http://www.cylview.org>, 2009).
